# Supplementary material for: Mitochondrial pyruvate carrier is required for optimal brown fat thermogenesis
Source: eLife journal article supplement (doi:10.7554/elife.52558), 2020-08-14
Supplement: supp [file elife-52558-supp-v1.zip]

Archive with 16 entries (16 files):
- elife_poa_e52558_Transparent_Reporting_File.docx
- elife_poa_e52558_Supplementary_file_1.xlsx
- elife_poa_e52558_Supplementary_file_2.xlsx
- elife_poa_e52558_Supplementary_file_3.xlsx
- elife_poa_e52558_Supplementary_file_4.xlsx
- elife_poa_e52558_Supplementary_file_5.xlsx
- elife_poa_e52558_Supplementary_file_6.xlsx
- elife_poa_e52558_Supplementary_file_7.xlsx
- elife_poa_e52558_Figure_1_figure_supplement_1.pdf
- elife_poa_e52558_Figure_2_figure_supplement_1.pdf
- elife_poa_e52558_Figure_3_figure_supplement_1.pdf
- elife_poa_e52558_Figure_4_figure_supplement_1.pdf
- elife_poa_e52558_Figure_5_figure_supplement_1.pdf
- elife_poa_e52558_Figure_6_figure_supplement_1.pdf
- elife_poa_e52558_Figure_7_figure_supplement_1.pdf
- elife_poa_e52558_Figure_8_figure_supplement_1.pdf
