# Supplementary material for: Mitochondrial pyruvate carrier is required for optimal brown fat thermogenesis
Source: eLife journal article supplement (doi:10.7554/elife.52558), 2020-08-14
Supplement: supp [file elife-52558-supp-v1.zip › elife_poa_e52558_Supplementary_file_1.xlsx]

## Sheet: SuppleTable1_UpInCR_q0.25_1907g
Supplementary File 1. List of 1,907 genes up-regulated in response to the cold.
GeneID	Symbol	Description	Foldchange (log)	t-value	p-value	FDR q-value
15370	Nr4a1	nuclear receptor subfamily 4, group A, member 1	3.69178	35.5764	1.15956e-10	1.31146e-06
216233	Socs2	suppressor of cytokine signaling 2	2.66636	32.0596	2.82904e-10	1.49367e-06
19252	Dusp1	dual specificity phosphatase 1	2.74905	30.8226	3.96199e-10	1.49367e-06
21684	Tectb	tectorin beta	2.12933	27.1153	1.18477e-09	2.98535e-06
18030	Nfil3	nuclear factor, interleukin 3, regulated	2.39543	26.2419	1.56669e-09	2.98535e-06
12737	Cldn1	claudin 1	3.50283	26.2086	1.58374e-09	2.98535e-06
21676	Tead1	TEA domain family member 1	2.70603	24.8049	2.53212e-09	4.09118e-06
99929	Tiparp	TCDD-inducible poly(ADP-ribose) polymerase	1.82469	23.5923	3.87984e-09	4.13411e-06
19017	Ppargc1a	peroxisome proliferative activated receptor, gamma, coactivator 1 alpha	4.36263	23.4936	4.0208e-09	4.13411e-06
70097	Sash1	SAM and SH3 domain containing 1	2.02529	23.0222	4.77713e-09	4.50245e-06
230379	Acer2	alkaline ceramidase 2	1.81101	22.2966	6.27148e-09	5.06646e-06
28248	Slco1a1	solute carrier organic anion transporter family, member 1a1	1.74405	21.1448	9.83741e-09	7.4174e-06
27219	Sgk2	serum/glucocorticoid regulated kinase 2	2.81924	19.6907	1.79851e-08	1.19654e-05
56706	Ccnl1	cyclin L1	1.23508	19.3655	2.07042e-08	1.30092e-05
11910	Atf3	activating transcription factor 3	3.63329	18.6334	2.86682e-08	1.54399e-05
13024	Ctla2a	cytotoxic T lymphocyte-associated protein 2 alpha	1.6167	18.1795	3.52956e-08	1.72055e-05
50934	Slc7a8	solute carrier family 7 (cationic amino acid transporter, y+ system), member 8	2.83764	18.1067	3.65104e-08	1.72055e-05
20515	Slc20a1	solute carrier family 20, member 1	2.7229	17.5314	4.79177e-08	2.08442e-05
64010	Sav1	salvador family WW domain containing 1	2.69081	17.0852	5.95193e-08	2.32125e-05
20971	Sdc4	syndecan 4	2.85144	17.0086	6.18085e-08	2.33018e-05
17164	Mapkapk2	MAP kinase-activated protein kinase 2	1.93624	16.7828	6.91497e-08	2.3505e-05
384783	Irs2	insulin receptor substrate 2	3.30999	16.7396	7.06605e-08	2.3505e-05
66355	Gmpr	guanosine monophosphate reductase	5.00143	16.6249	7.4861e-08	2.41381e-05
58250	Chst11	carbohydrate sulfotransferase 11	2.11129	16.5059	7.95098e-08	2.41381e-05
12575	Cdkn1a	cyclin-dependent kinase inhibitor 1A (P21)	3.30258	16.4872	8.02707e-08	2.41381e-05
14718	Got1	glutamic-oxaloacetic transaminase 1, soluble	2.8322	16.467	8.11005e-08	2.41381e-05
16780	Lamb3	laminin, beta 3	2.29186	16.1767	9.4136e-08	2.51815e-05
56705	Ranbp9	RAN binding protein 9	1.85132	16.1707	9.44288e-08	2.51815e-05
11911	Atf4	activating transcription factor 4	2.00049	16.1258	9.66581e-08	2.51815e-05
56200	Ddx21	DEAD (Asp-Glu-Ala-Asp) box polypeptide 21	0.986316	16.0902	9.8462e-08	2.51815e-05
74155	Errfi1	ERBB receptor feedback inhibitor 1	1.87487	15.9235	1.07431e-07	2.58521e-05
12795	Plk3	polo like kinase 3	2.99803	15.8552	1.11368e-07	2.62411e-05
50500	Ttpa	tocopherol (alpha) transfer protein	2.65533	15.8152	1.13746e-07	2.62544e-05
11489	Adam12	a disintegrin and metallopeptidase domain 12 (meltrin alpha)	1.89751	15.7089	1.20351e-07	2.67327e-05
17254	Slc3a2	solute carrier family 3 (activators of dibasic and neutral amino acid transport), member 2	2.79532	15.7058	1.20546e-07	2.67327e-05
23882	Gadd45g	growth arrest and DNA-damage-inducible 45 gamma	3.12592	15.5431	1.31511e-07	2.67453e-05
213053	Slc39a14	solute carrier family 39 (zinc transporter), member 14	2.22078	15.5302	1.32426e-07	2.67453e-05
14579	Gem	GTP binding protein (gene overexpressed in skeletal muscle)	1.81588	15.4162	1.40838e-07	2.72686e-05
15516	Hsp90ab1	heat shock protein 90 alpha (cytosolic), class B member 1	1.73444	15.3325	1.47391e-07	2.72686e-05
83493	Sacm1l	SAC1 suppressor of actin mutations 1-like (yeast)	1.16632	15.3107	1.49155e-07	2.72686e-05
67045	Riok2	RIO kinase 2	1.45143	15.2967	1.50298e-07	2.72686e-05
18451	P4ha1	procollagen-proline, 2-oxoglutarate 4-dioxygenase (proline 4-hydroxylase), alpha 1 polypeptide	2.40036	15.2773	1.51894e-07	2.72686e-05
63954	Rbp7	retinol binding protein 7, cellular	2.87818	15.1907	1.59278e-07	2.73615e-05
11865	Arntl	aryl hydrocarbon receptor nuclear translocator-like	1.70816	15.1743	1.60719e-07	2.73615e-05
18227	Nr4a2	nuclear receptor subfamily 4, group A, member 2	1.69572	15.1742	1.60726e-07	2.73615e-05
12662	Chm	choroidermia (RAB escort protein 1)	0.656589	14.8883	1.88354e-07	3.13278e-05
20397	Sgpl1	sphingosine phosphate lyase 1	2.17999	14.677	2.12173e-07	3.47779e-05
17912	Myo1b	myosin IB	1.48384	14.6085	2.20607e-07	3.53017e-05
15159	Hccs	holocytochrome c synthetase	1.42777	14.6005	2.21611e-07	3.53017e-05
57754	Cend1	cell cycle exit and neuronal differentiation 1	2.31959	14.493	2.35672e-07	3.6513e-05
15505	Hsph1	heat shock 105kDa/110kDa protein 1	2.31428	14.1518	2.87282e-07	4.16559e-05
16527	Kcnk3	potassium channel, subfamily K, member 3	1.64447	14.1186	2.92938e-07	4.18341e-05
330836	Slc7a6	solute carrier family 7 (cationic amino acid transporter, y+ system), member 6	1.9473	14.1014	2.95909e-07	4.18341e-05
16476	Jun	jun proto-oncogene	1.8222	13.7753	3.59308e-07	4.90235e-05
56336	B4galt5	UDP-Gal:betaGlcNAc beta 1,4-galactosyltransferase, polypeptide 5	1.55562	13.6773	3.81196e-07	5.13253e-05
22271	Upp1	uridine phosphorylase 1	1.02747	13.6325	3.91692e-07	5.21181e-05
18787	Serpine1	serine (or cysteine) peptidase inhibitor, clade E, member 1	1.40626	13.5212	4.19193e-07	5.37329e-05
14389	Gab2	growth factor receptor bound protein 2-associated protein 2	0.810312	13.3319	4.7105e-07	5.79084e-05
17691	Sik1	salt inducible kinase 1	2.12482	13.2529	4.94756e-07	6.01687e-05
57436	Gabarapl1	gamma-aminobutyric acid (GABA) A receptor-associated protein-like 1	1.92935	13.1914	5.14135e-07	6.14834e-05
27273	Pdk4	pyruvate dehydrogenase kinase, isoenzyme 4	2.07704	13.151	5.27311e-07	6.14834e-05
29810	Bag3	BCL2-associated athanogene 3	1.69531	13.0808	5.5113e-07	6.28044e-05
27362	Dnajb9	DnaJ heat shock protein family (Hsp40) member B9	1.72612	13.0616	5.57862e-07	6.28044e-05
216558	Ugp2	UDP-glucose pyrophosphorylase 2	1.97645	13.0346	5.67475e-07	6.29229e-05
14313	Fst	follistatin	1.46868	12.9099	6.14289e-07	6.74525e-05
208449	Sgms1	sphingomyelin synthase 1	1.31456	12.8525	6.37247e-07	6.86406e-05
14585	Gfra1	glial cell line derived neurotrophic factor family receptor alpha 1	0.915465	12.8162	6.52278e-07	6.89463e-05
17133	Maff	v-maf musculoaponeurotic fibrosarcoma oncogene family, protein F (avian)	2.17849	12.7977	6.60082e-07	6.91252e-05
80515	Rnf227	ring finger protein 227	0.924063	12.7774	6.68761e-07	6.93916e-05
217378	Dnajc27	DnaJ heat shock protein family (Hsp40) member C27	1.61446	12.7591	6.76726e-07	6.95798e-05
17748	Mt1	metallothionein 1	1.93276	12.7356	6.87076e-07	6.96838e-05
11861	Arl4a	ADP-ribosylation factor-like 4A	1.13265	12.718	6.94942e-07	6.96838e-05
13088	Cyp2b10	cytochrome P450, family 2, subfamily b, polypeptide 10	4.13804	12.7151	6.96222e-07	6.96838e-05
217698	Acot5	acyl-CoA thioesterase 5	1.88004	12.6808	7.11882e-07	7.06046e-05
20926	Supt6	SPT6, histone chaperone and transcription elongation factor	0.911655	12.6678	7.17907e-07	7.06046e-05
108767	Pnrc1	proline-rich nuclear receptor coactivator 1	1.35233	12.639	7.31478e-07	7.08657e-05
12660	Chka	choline kinase alpha	1.23852	12.3482	8.85712e-07	7.86818e-05
17750	Mt2	metallothionein 2	2.84654	12.3401	8.90475e-07	7.86818e-05
70686	Dusp16	dual specificity phosphatase 16	1.01609	12.2819	9.25678e-07	7.99192e-05
17158	Man2a1	mannosidase 2, alpha 1	1.14502	12.176	9.93831e-07	8.3261e-05
19084	Prkar1a	protein kinase, cAMP dependent regulatory, type I, alpha	0.751215	12.1516	1.01033e-06	8.35134e-05
11931	Atp1b1	ATPase, Na+/K+ transporting, beta 1 polypeptide	1.36753	12.1497	1.01161e-06	8.35134e-05
30059	Timm10	translocase of inner mitochondrial membrane 10	0.894158	12.0833	1.05804e-06	8.60892e-05
18858	Pmp22	peripheral myelin protein 22	1.26684	11.9032	1.19643e-06	9.46265e-05
170460	Stard5	StAR-related lipid transfer (START) domain containing 5	1.28817	11.8806	1.21519e-06	9.49957e-05
14284	Fosl2	fos-like antigen 2	1.29284	11.8774	1.21789e-06	9.49957e-05
14219	Ccn2	cellular communication network factor 2	1.0925	11.8665	1.22701e-06	9.50511e-05
116914	Slc19a2	solute carrier family 19 (thiamine transporter), member 2	0.832165	11.6739	1.40253e-06	0.000103806
16956	Lpl	lipoprotein lipase	1.25582	11.6721	1.40427e-06	0.000103806
74747	Ddit4	DNA-damage-inducible transcript 4	2.21279	11.5782	1.49996e-06	0.000109448
16777	Lamb1	laminin B1	1.46827	11.5529	1.52693e-06	0.000109997
11555	Adrb2	adrenergic receptor, beta 2	1.32108	11.3981	1.70436e-06	0.000120477
18124	Nr4a3	nuclear receptor subfamily 4, group A, member 3	3.09801	11.3727	1.73557e-06	0.000121921
328365	Zmiz1	zinc finger, MIZ-type containing 1	0.81437	11.3556	1.75698e-06	0.000122663
29863	Pde7b	phosphodiesterase 7B	1.54516	11.3467	1.76823e-06	0.000122691
15528	Hspe1	heat shock protein 1 (chaperonin 10)	1.27738	11.2416	1.90725e-06	0.000128399
326618	Tpm4	tropomyosin 4	1.00958	11.1885	1.98192e-06	0.000131856
16880	Lifr	LIF receptor alpha	1.17798	11.0978	2.1174e-06	0.000140046
14451	Gas1	growth arrest specific 1	1.89354	11.0706	2.15994e-06	0.000141208
22210	Ube2b	ubiquitin-conjugating enzyme E2B	0.906357	11.0167	2.24722e-06	0.00014441
233489	Picalm	phosphatidylinositol binding clathrin assembly protein	0.893208	10.9366	2.38411e-06	0.000150638
60599	Trp53inp1	transformation related protein 53 inducible nuclear protein 1	1.78324	10.912	2.42794e-06	0.000152224
74132	Rnf6	ring finger protein (C3H2C3 type) 6	0.665367	10.8482	2.54608e-06	0.000158221
13664	Eif1a	eukaryotic translation initiation factor 1A	1.81735	10.8286	2.58364e-06	0.000159678
13371	Dio2	deiodinase, iodothyronine, type II	4.34474	10.8128	2.61429e-06	0.000160553
15368	Hmox1	heme oxygenase 1	4.4082	10.8067	2.6262e-06	0.000160553
22057	Tob1	transducer of ErbB-2.1	0.906034	10.7758	2.6877e-06	0.000162556
12457	Noct	nocturnin	2.25158	10.7455	2.74961e-06	0.000165098
14933	Gk	glycerol kinase	2.46977	10.741	2.75894e-06	0.000165098
16891	Lipg	lipase, endothelial	1.38228	10.7072	2.83017e-06	0.000165659
225363	Etf1	eukaryotic translation termination factor 1	1.12506	10.6937	2.8592e-06	0.000165833
215512	Fam117a	family with sequence similarity 117, member A	1.94523	10.6591	2.93492e-06	0.000168497
16210	Impact	impact, RWD domain protein	1.73874	10.6111	3.04387e-06	0.000171824
52014	Nus1	NUS1 dehydrodolichyl diphosphate synthase subunit	0.544713	10.5929	3.08638e-06	0.000171824
213989	Tmem82	transmembrane protein 82	0.711285	10.5477	3.19477e-06	0.000172061
68487	Tmem140	transmembrane protein 140	1.55199	10.4774	3.37174e-06	0.00017915
73130	Tmed5	transmembrane p24 trafficking protein 5	0.966472	10.4765	3.37392e-06	0.00017915
16009	Igfbp3	insulin-like growth factor binding protein 3	1.15623	10.4578	3.42277e-06	0.000180895
66549	Aggf1	angiogenic factor with G patch and FHA domains 1	0.807274	10.4198	3.52465e-06	0.000183681
16364	Irf4	interferon regulatory factor 4	3.44763	10.41	3.55153e-06	0.000183681
66917	Chordc1	cysteine and histidine-rich domain (CHORD)-containing, zinc-binding protein 1	1.19518	10.3857	3.6189e-06	0.000183681
56715	Rabgef1	RAB guanine nucleotide exchange factor (GEF) 1	1.04712	10.3818	3.63002e-06	0.000183681
240442	Adnp2	ADNP homeobox 2	1.13084	10.308	3.84446e-06	0.000192393
51897	Atg13	autophagy related 13	1.35343	10.2568	4.00128e-06	0.000197423
20671	Sox17	SRY (sex determining region Y)-box 17	1.08366	10.2105	4.14923e-06	0.000199693
15568	Elavl1	ELAV (embryonic lethal, abnormal vision)-like 1 (Hu antigen R)	0.784788	10.1876	4.22488e-06	0.000202257
67760	Slc38a2	solute carrier family 38, member 2	1.77251	10.1774	4.25896e-06	0.000202257
16782	Lamc2	laminin, gamma 2	0.889398	10.1173	4.46625e-06	0.000209599
20454	St3gal5	ST3 beta-galactoside alpha-2,3-sialyltransferase 5	1.55301	10.0971	4.53835e-06	0.000210761
68118	Atg101	autophagy related 101	1.50583	10.0396	4.75085e-06	0.000215792
66687	Tbc1d15	TBC1 domain family, member 15	1.05399	10.0234	4.81263e-06	0.000217547
107508	Eprs	glutamyl-prolyl-tRNA synthetase	1.04932	9.9889	4.94748e-06	0.000220646
16658	Mafb	v-maf musculoaponeurotic fibrosarcoma oncogene family, protein B (avian)	2.0132	9.94533	5.12357e-06	0.000224603
78100	Msantd4	Myb/SANT-like DNA-binding domain containing 4 with coiled-coils	0.740805	9.92204	5.22058e-06	0.000226799
170822	Usp33	ubiquitin specific peptidase 33	1.2631	9.91889	5.23383e-06	0.000226799
19356	Rad17	RAD17 checkpoint clamp loader component	0.729089	9.90764	5.28157e-06	0.000227994
328417	Parp4	poly (ADP-ribose) polymerase family, member 4	0.474813	9.89873	5.31969e-06	0.000228767
13544	Dvl3	dishevelled segment polarity protein 3	0.50984	9.87437	5.42551e-06	0.000232434
94219	Cnnm2	cyclin M2	1.52573	9.85943	5.49153e-06	0.000234374
56445	Dnaja2	DnaJ heat shock protein family (Hsp40) member A2	0.7449	9.7899	5.8108e-06	0.000244643
225182	Rbbp8	retinoblastoma binding protein 8, endonuclease	0.513977	9.78825	5.81865e-06	0.000244643
108841	Rdh13	retinol dehydrogenase 13 (all-trans and 9-cis)	0.839574	9.7588	5.96026e-06	0.000249669
208263	Tor1aip1	torsin A interacting protein 1	0.614034	9.72998	6.10252e-06	0.000253533
217737	Ahsa1	AHA1, activator of heat shock protein ATPase 1	1.64049	9.7124	6.19114e-06	0.000254625
30877	Gnl3	guanine nucleotide binding protein-like 3 (nucleolar)	1.51708	9.66334	6.44607e-06	0.000261827
20623	Snrk	SNF related kinase	1.32244	9.63936	6.57491e-06	0.000264634
67379	Dedd2	death effector domain-containing DNA binding protein 2	1.08283	9.56481	6.99397e-06	0.000276866
12583	Cdo1	cysteine dioxygenase 1, cytosolic	1.18295	9.56356	7.00121e-06	0.000276866
108664	Atp6v1h	ATPase, H+ transporting, lysosomal V1 subunit H	1.52157	9.50901	7.32696e-06	0.000287312
15458	Hpx	hemopexin	2.33323	9.48406	7.4815e-06	0.000291779
230734	Yrdc	yrdC domain containing (E.coli)	0.621378	9.46696	7.58949e-06	0.000294973
319475	Zfp672	zinc finger protein 672	1.04156	9.41204	7.94818e-06	0.000306805
233979	Tpcn2	two pore segment channel 2	1.40892	9.38818	8.10981e-06	0.000310666
27279	Tnfrsf12a	tumor necrosis factor receptor superfamily, member 12a	1.03942	9.38527	8.12971e-06	0.000310666
71881	Apmap	adipocyte plasma membrane associated protein	1.44045	9.38514	8.13061e-06	0.000310666
16784	Lamp2	lysosomal-associated membrane protein 2	0.927496	9.37945	8.16982e-06	0.000311113
56722	Litaf	LPS-induced TN factor	1.27508	9.36382	8.2786e-06	0.000314198
12607	Cebpz	CCAAT/enhancer binding protein zeta	0.966384	9.35334	8.35234e-06	0.000314493
227648	Sec16a	SEC16 homolog A, endoplasmic reticulum export factor	0.57463	9.35088	8.3698e-06	0.000314493
17896	Myl4	myosin, light polypeptide 4	0.641282	9.32304	8.56985e-06	0.000320314
14229	Fkbp5	FK506 binding protein 5	1.45771	9.29952	8.74305e-06	0.000324128
12836	Col7a1	collagen, type VII, alpha 1	0.327574	9.29597	8.76951e-06	0.000324128
18003	Nedd9	neural precursor cell expressed, developmentally down-regulated gene 9	1.01542	9.28401	8.85934e-06	0.000326382
105148	Iars	isoleucine-tRNA synthetase	0.66601	9.26278	9.02129e-06	0.000331269
66350	Pla2g12a	phospholipase A2, group XIIA	0.746642	9.24272	9.17737e-06	0.00033439
14626	Gk2	glycerol kinase 2	2.13764	9.24048	9.19499e-06	0.00033439
26889	Cln8	ceroid-lipofuscinosis, neuronal 8	0.531915	9.22441	9.32243e-06	0.000337938
13383	Dlg1	discs large MAGUK scaffold protein 1	0.993731	9.20161	9.50657e-06	0.000342418
21937	Tnfrsf1a	tumor necrosis factor receptor superfamily, member 1a	1.28036	9.18846	9.61466e-06	0.000343481
13367	Diaph1	diaphanous related formin 1	0.735434	9.18695	9.62718e-06	0.000343481
69065	Chac1	ChaC, cation transport regulator 1	2.2242	9.16083	9.84614e-06	0.000348
217335	Fbf1	Fas (TNFRSF6) binding factor 1	0.82034	9.12075	1.0193e-05	0.000356912
192652	Wdr81	WD repeat domain 81	0.709415	9.08384	1.05243e-05	0.000367376
353258	Ltv1	LTV1 ribosome biogenesis factor	0.938763	9.07823	1.05758e-05	0.000368037
18113	Nnmt	nicotinamide N-methyltransferase	3.07422	9.06962	1.06551e-05	0.000369661
56195	Ptbp2	polypyrimidine tract binding protein 2	0.487738	9.05864	1.07574e-05	0.000372069
19014	Med1	mediator complex subunit 1	0.803774	9.03441	1.09869e-05	0.000376551
110197	Dgkg	diacylglycerol kinase, gamma	0.995302	9.02773	1.10511e-05	0.000377609
269966	Nup98	nucleoporin 98	0.540421	8.97863	1.15361e-05	0.000391289
18720	Pip5k1a	phosphatidylinositol-4-phosphate 5-kinase, type 1 alpha	1.16182	8.95999	1.17262e-05	0.000394714
66397	Sar1b	secretion associated Ras related GTPase 1B	1.10685	8.94955	1.18343e-05	0.00039595
56484	Foxo3	forkhead box O3	0.568455	8.94762	1.18543e-05	0.00039595
67955	Sugt1	SGT1, suppressor of G2 allele of SKP1 (S. cerevisiae)	1.15259	8.94297	1.1903e-05	0.00039595
20393	Sgk1	serum/glucocorticoid regulated kinase 1	1.63478	8.90461	1.23122e-05	0.000408295
226641	Atf6	activating transcription factor 6	1.11825	8.90147	1.23463e-05	0.000408295
56636	Fgf21	fibroblast growth factor 21	2.27377	8.87571	1.26307e-05	0.00041429
211770	Trib1	tribbles pseudokinase 1	1.6571	8.86327	1.27706e-05	0.000414819
11972	Atp6v0d1	ATPase, H+ transporting, lysosomal V0 subunit D1	0.774894	8.86064	1.28003e-05	0.000414819
68879	Prpf6	pre-mRNA splicing factor 6	0.659865	8.83155	1.31351e-05	0.000420845
20844	Stam	signal transducing adaptor molecule (SH3 domain and ITAM motif) 1	1.07097	8.81103	1.3377e-05	0.00042572
227731	Slc25a25	solute carrier family 25 (mitochondrial carrier, phosphate carrier), member 25	1.00621	8.80573	1.34404e-05	0.00042572
20525	Slc2a1	solute carrier family 2 (facilitated glucose transporter), member 1	1.07499	8.78711	1.36653e-05	0.000429318
17768	Mthfd2	methylenetetrahydrofolate dehydrogenase (NAD+ dependent), methenyltetrahydrofolate cyclohydrolase	1.56627	8.7416	1.42329e-05	0.000442016
66245	Hspbp1	HSPA (heat shock 70kDa) binding protein, cytoplasmic cochaperone 1	0.693326	8.73716	1.42897e-05	0.000442016
84092	Usp8	ubiquitin specific peptidase 8	0.701944	8.73564	1.43092e-05	0.000442016
68734	Ppp4r3a	protein phosphatase 4 regulatory subunit 3A	0.701488	8.733	1.43431e-05	0.000442016
67949	Nifk	nucleolar protein interacting with the FHA domain of MKI67	0.784433	8.71865	1.4529e-05	0.000444566
12389	Cav1	caveolin 1, caveolae protein	0.959175	8.71661	1.45556e-05	0.000444566
16510	Kcnh1	potassium voltage-gated channel, subfamily H (eag-related), member 1	0.247999	8.71452	1.4583e-05	0.000444566
11800	Api5	apoptosis inhibitor 5	0.940925	8.65895	1.53315e-05	0.000458131
57435	Plin4	perilipin 4	1.0366	8.63506	1.56663e-05	0.000465016
217232	Cdc27	cell division cycle 27	1.26843	8.61789	1.59118e-05	0.000469875
24074	Taf7	TATA-box binding protein associated factor 7	1.1494	8.54232	1.70443e-05	0.000494286
18626	Per1	period circadian clock 1	1.21906	8.51829	1.74228e-05	0.000498865
93736	Aff4	AF4/FMR2 family, member 4	0.964859	8.49731	1.7761e-05	0.000505231
54170	Rragc	Ras-related GTP binding C	0.852001	8.46717	1.82595e-05	0.000512443
11745	Anxa3	annexin A3	1.29887	8.44818	1.85813e-05	0.000520027
76863	Dcun1d5	DCN1, defective in cullin neddylation 1, domain containing 5 (S. cerevisiae)	0.890469	8.44505	1.8635e-05	0.000520027
19386	Ranbp2	RAN binding protein 2	1.09995	8.42652	1.89563e-05	0.000521767
229906	Gtf2b	general transcription factor IIB	0.415517	8.41472	1.9164e-05	0.000524634
209039	Tns2	tensin 2	0.70152	8.41422	1.9173e-05	0.000524634
66595	Aste1	asteroid homolog 1	0.958822	8.41246	1.92041e-05	0.000524634
14547	Gdap2	ganglioside-induced differentiation-associated-protein 2	1.09697	8.40695	1.93022e-05	0.000524779
103466	Nt5dc3	5'-nucleotidase domain containing 3	0.512081	8.36999	1.99747e-05	0.000536613
101118	Tmem168	transmembrane protein 168	0.359515	8.36574	2.00537e-05	0.000537231
268741	Tox4	TOX high mobility group box family member 4	0.609859	8.36364	2.00927e-05	0.000537231
77264	Zfp142	zinc finger protein 142	0.417121	8.35541	2.0247e-05	0.000538563
11504	Adamts1	a disintegrin-like and metallopeptidase (reprolysin type) with thrombospondin type 1 motif, 1	1.06809	8.35337	2.02854e-05	0.000538563
67878	Tmem33	transmembrane protein 33	0.77868	8.31619	2.10003e-05	0.000552357
232087	Mat2a	methionine adenosyltransferase II, alpha	0.994338	8.30144	2.12915e-05	0.000558717
14732	Gpam	glycerol-3-phosphate acyltransferase, mitochondrial	1.25266	8.27818	2.17598e-05	0.000568369
69082	Zc3h15	zinc finger CCCH-type containing 15	0.614945	8.27208	2.18844e-05	0.000568595
56421	Pfkp	phosphofructokinase, platelet	1.2748	8.27076	2.19115e-05	0.000568595
114565	Zbtb21	zinc finger and BTB domain containing 21	0.844909	8.26737	2.19813e-05	0.000568595
26440	Psma1	proteasome (prosome, macropain) subunit, alpha type 1	0.926591	8.26064	2.21204e-05	0.000568595
216805	Flcn	folliculin	1.40611	8.25611	2.22146e-05	0.000569722
18805	Pld1	phospholipase D1	0.514974	8.21766	2.30324e-05	0.000588029
104831	Ptpn23	protein tyrosine phosphatase, non-receptor type 23	0.658374	8.21505	2.3089e-05	0.000588146
193670	Rnf185	ring finger protein 185	0.88363	8.21135	2.31696e-05	0.000588873
19822	Rnf4	ring finger protein 4	0.840352	8.18607	2.37292e-05	0.000600709
22668	Sf1	splicing factor 1	0.717239	8.18552	2.37415e-05	0.000600709
12421	Rb1cc1	RB1-inducible coiled-coil 1	0.938536	8.15777	2.43731e-05	0.000612327
67434	Ankrd33b	ankyrin repeat domain 33B	0.89331	8.14891	2.45786e-05	0.000613651
27049	Etv3	ets variant 3	0.635736	8.12824	2.50657e-05	0.000624433
104111	Adcy3	adenylate cyclase 3	2.06654	8.12366	2.51749e-05	0.000625775
68083	Pak1ip1	PAK1 interacting protein 1	1.1457	8.10431	2.56427e-05	0.000633228
17872	Ppp1r15a	protein phosphatase 1, regulatory subunit 15A	1.30349	8.09591	2.58487e-05	0.000636541
81489	Dnajb1	DnaJ heat shock protein family (Hsp40) member B1	1.53793	8.08227	2.61874e-05	0.000642471
16601	Klf9	Kruppel-like factor 9	1.01564	8.07073	2.64775e-05	0.000648183
14050	Eya3	EYA transcriptional coactivator and phosphatase 3	0.718437	8.06096	2.6726e-05	0.000652853
67812	Ubxn4	UBX domain protein 4	1.05007	8.00632	2.81638e-05	0.000680626
54351	Elp5	elongator acetyltransferase complex subunit 5	0.734665	7.96057	2.94334e-05	0.000698734
22227	Ucp1	uncoupling protein 1 (mitochondrial, proton carrier)	1.32641	7.95728	2.95269e-05	0.000698734
74112	Usp16	ubiquitin specific peptidase 16	0.744208	7.95714	2.95309e-05	0.000698734
12462	Cct3	chaperonin containing Tcp1, subunit 3 (gamma)	0.979859	7.93936	3.00431e-05	0.000706419
69632	Arhgef12	Rho guanine nucleotide exchange factor (GEF) 12	1.0933	7.92509	3.04614e-05	0.000711815
52432	Ppp2r2d	protein phosphatase 2, regulatory subunit B, delta	0.868727	7.91086	3.08846e-05	0.000715788
83429	Ctns	cystinosis, nephropathic	0.963121	7.88685	3.16139e-05	0.000726595
56458	Foxo1	forkhead box O1	1.07682	7.88426	3.16936e-05	0.000726595
100213	Rusc2	RUN and SH3 domain containing 2	1.15815	7.87914	3.18521e-05	0.000726595
67065	Polr3d	polymerase (RNA) III (DNA directed) polypeptide D	0.581159	7.87621	3.19431e-05	0.000726595
19820	Rlim	ring finger protein, LIM domain interacting	0.568815	7.8762	3.19433e-05	0.000726595
114332	Lyve1	lymphatic vessel endothelial hyaluronan receptor 1	1.41771	7.8753	3.19713e-05	0.000726595
235320	Zbtb16	zinc finger and BTB domain containing 16	1.59817	7.87504	3.19793e-05	0.000726595
20496	Slc12a2	solute carrier family 12, member 2	1.71428	7.87254	3.20575e-05	0.000726595
207304	Hectd1	HECT domain E3 ubiquitin protein ligase 1	0.955009	7.86194	3.23905e-05	0.000728302
76650	Srxn1	sulfiredoxin 1 homolog (S. cerevisiae)	0.951292	7.80712	3.41746e-05	0.000762356
71934	Car13	carbonic anhydrase 13	0.81776	7.80093	3.43825e-05	0.000765485
338365	Slc41a2	solute carrier family 41, member 2	0.772583	7.78676	3.48642e-05	0.000771652
30056	Timm9	translocase of inner mitochondrial membrane 9	0.854969	7.78404	3.49577e-05	0.000772209
17190	Mbd1	methyl-CpG binding domain protein 1	1.00129	7.77795	3.51677e-05	0.000773825
74164	Nfx1	nuclear transcription factor, X-box binding 1	0.694503	7.7721	3.53708e-05	0.00077528
13870	Ercc1	excision repair cross-complementing rodent repair deficiency, complementation group 1	0.997182	7.75708	3.58977e-05	0.00078379
58180	Hic2	hypermethylated in cancer 2	0.219614	7.73208	3.67944e-05	0.000795688
11973	Atp6v1e1	ATPase, H+ transporting, lysosomal V1 subunit E1	0.811697	7.71508	3.74181e-05	0.000804561
107094	Rrp12	ribosomal RNA processing 12 homolog (S. cerevisiae)	0.978389	7.7095	3.76255e-05	0.000807484
107817	Jmjd6	jumonji domain containing 6	0.738988	7.7063	3.77449e-05	0.000808514
15502	Dnaja1	DnaJ heat shock protein family (Hsp40) member A1	1.07856	7.66301	3.94025e-05	0.000837673
12492	Scarb2	scavenger receptor class B, member 2	1.01688	7.65923	3.95512e-05	0.000838519
14236	Foxn2	forkhead box N2	1.28089	7.65576	3.96879e-05	0.000838519
73834	Atp6v1d	ATPase, H+ transporting, lysosomal V1 subunit D	0.685177	7.6526	3.9813e-05	0.000838519
20867	Stip1	stress-induced phosphoprotein 1	0.910211	7.64806	3.99935e-05	0.000840755
29808	Mga	MAX gene associated	1.10218	7.64163	4.02506e-05	0.00084459
105675	Ppif	peptidylprolyl isomerase F (cyclophilin F)	0.997445	7.61105	4.14988e-05	0.000861195
105440	Kctd9	potassium channel tetramerisation domain containing 9	0.809256	7.57773	4.29072e-05	0.000883193
18627	Per2	period circadian clock 2	0.591984	7.57676	4.29493e-05	0.000883193
192657	Ell2	elongation factor RNA polymerase II 2	1.00116	7.56837	4.33127e-05	0.00088905
214899	Kdm5a	lysine (K)-specific demethylase 5A	0.534252	7.55375	4.39537e-05	0.000894154
17977	Ncoa1	nuclear receptor coactivator 1	0.694738	7.55369	4.39566e-05	0.000894154
23881	G3bp2	GTPase activating protein (SH3 domain) binding protein 2	0.815647	7.53878	4.46211e-05	0.000905207
20321	Frrs1	ferric-chelate reductase 1	1.36092	7.53516	4.47843e-05	0.000905207
21844	Tiam1	T cell lymphoma invasion and metastasis 1	0.314454	7.53437	4.48201e-05	0.000905207
66409	Rsl1d1	ribosomal L1 domain containing 1	0.783682	7.51858	4.55397e-05	0.000912198
272589	Tbcel	tubulin folding cofactor E-like	0.784952	7.50111	4.63507e-05	0.000922949
11987	Slc7a1	solute carrier family 7 (cationic amino acid transporter, y+ system), member 1	0.852639	7.48652	4.70401e-05	0.000928488
76479	Smndc1	survival motor neuron domain containing 1	0.833843	7.48417	4.71523e-05	0.000928582
75735	Pank1	pantothenate kinase 1	0.866584	7.48127	4.72912e-05	0.000928582
66569	Gdpd1	glycerophosphodiester phosphodiesterase domain containing 1	0.342063	7.47404	4.76387e-05	0.000933257
18412	Sqstm1	sequestosome 1	1.37688	7.4467	4.89799e-05	0.000952067
67072	Cdc37l1	cell division cycle 37-like 1	0.845473	7.43989	4.93209e-05	0.000956808
75416	Nop14	NOP14 nucleolar protein	0.710482	7.43653	4.94894e-05	0.000958045
15186	Hdc	histidine decarboxylase	0.695035	7.41162	5.07621e-05	0.000976812
69077	Psmd11	proteasome (prosome, macropain) 26S subunit, non-ATPase, 11	0.948797	7.40954	5.08702e-05	0.000976812
545156	Kalrn	kalirin, RhoGEF kinase	0.42247	7.39586	5.15862e-05	0.00098888
52187	Rragd	Ras-related GTP binding D	1.17002	7.39386	5.16919e-05	0.000989231
21825	Thbs1	thrombospondin 1	0.949163	7.38619	5.20988e-05	0.000994538
57753	Noc3l	NOC3 like DNA replication regulator	0.711166	7.38292	5.22735e-05	0.000994538
14884	Gtf2h1	general transcription factor II H, polypeptide 1	0.648036	7.38203	5.2321e-05	0.000994538
11790	Speg	SPEG complex locus	0.634858	7.37643	5.26222e-05	0.000996034
26900	Ddx3y	DEAD (Asp-Glu-Ala-Asp) box polypeptide 3, Y-linked	0.460104	7.3595	5.3543e-05	0.00100761
14011	Etv6	ets variant 6	0.497733	7.35056	5.4037e-05	0.00101521
71911	Bdh1	3-hydroxybutyrate dehydrogenase, type 1	0.942407	7.32594	5.54226e-05	0.00103437
56805	Zbtb33	zinc finger and BTB domain containing 33	0.520872	7.31676	5.59488e-05	0.00104247
20524	Slc25a17	solute carrier family 25 (mitochondrial carrier, peroxisomal membrane protein), member 17	1.05908	7.31418	5.60978e-05	0.00104353
18738	Pitpna	phosphatidylinositol transfer protein, alpha	0.531076	7.30056	5.68916e-05	0.00105136
23806	Arih1	ariadne RBR E3 ubiquitin protein ligase 1	0.407452	7.27827	5.82172e-05	0.00106716
12741	Cldn5	claudin 5	1.57315	7.21853	6.19411e-05	0.0011191
20226	Sars	seryl-aminoacyl-tRNA synthetase	0.959032	7.19951	6.31809e-05	0.00113605
213056	Fam126b	family with sequence similarity 126, member B	1.09127	7.17669	6.47047e-05	0.00115427
20918	Eif1	eukaryotic translation initiation factor 1	1.19083	7.16852	6.52601e-05	0.00115858
22339	Vegfa	vascular endothelial growth factor A	1.02887	7.16592	6.54382e-05	0.00115858
12048	Bcl2l1	BCL2-like 1	0.84728	7.16502	6.54996e-05	0.00115858
67204	Eif2s2	eukaryotic translation initiation factor 2, subunit 2 (beta)	0.686487	7.16413	6.55606e-05	0.00115858
68142	Ino80	INO80 complex subunit	0.569529	7.14863	6.66342e-05	0.00117275
74148	Cluh	clustered mitochondria (cluA/CLU1) homolog	0.715474	7.14682	6.67604e-05	0.00117275
53382	Txnl1	thioredoxin-like 1	0.801898	7.12618	6.82231e-05	0.00118526
22063	Trpc1	transient receptor potential cation channel, subfamily C, member 1	0.729975	7.09788	7.02863e-05	0.00120726
107869	Cth	cystathionase (cystathionine gamma-lyase)	1.5159	7.09086	7.08083e-05	0.0012134
94245	Dtnbp1	dystrobrevin binding protein 1	0.814323	7.06974	7.24052e-05	0.00123329
55985	Cxcl13	chemokine (C-X-C motif) ligand 13	1.03138	7.06426	7.28262e-05	0.00123525
24082	Map2k3os	mitogen-activated protein kinase kinase 3, opposite strand	1.0299	7.05719	7.33733e-05	0.00124229
57746	Piwil2	piwi-like RNA-mediated gene silencing 2	0.185709	7.05433	7.35954e-05	0.00124419
67979	Atad1	ATPase family, AAA domain containing 1	0.649888	7.02843	7.56446e-05	0.00127123
70223	Nars	asparaginyl-tRNA synthetase	1.02241	7.01387	7.6824e-05	0.00128532
75089	Uhrf1bp1l	UHRF1 (ICBP90) binding protein 1-like	0.714689	6.99371	7.84908e-05	0.00130357
237336	Tbpl1	TATA box binding protein-like 1	0.85108	6.98962	7.88338e-05	0.00130576
110877	Slc18a1	solute carrier family 18 (vesicular monoamine), member 1	0.213992	6.98938	7.88535e-05	0.00130576
83397	Akap12	A kinase (PRKA) anchor protein (gravin) 12	1.13108	6.97709	7.98945e-05	0.00132106
19255	Ptpn2	protein tyrosine phosphatase, non-receptor type 2	0.563815	6.97159	8.03652e-05	0.00132691
22213	Ube2g2	ubiquitin-conjugating enzyme E2G 2	0.815179	6.95565	8.17463e-05	0.00133715
66684	Tceal8	transcription elongation factor A (SII)-like 8	0.493613	6.95489	8.18131e-05	0.00133715
66827	Ttc1	tetratricopeptide repeat domain 1	1.12132	6.92996	8.40278e-05	0.00136939
18432	Mybbp1a	MYB binding protein (P160) 1a	0.728161	6.92221	8.47295e-05	0.00137685
104263	Kdm3a	lysine (K)-specific demethylase 3A	0.616715	6.91583	8.53114e-05	0.00138432
57261	Brd4	bromodomain containing 4	0.528367	6.91091	8.57638e-05	0.00138967
13056	Cyb561	cytochrome b-561	0.525563	6.90154	8.66328e-05	0.00140174
66629	Golph3	golgi phosphoprotein 3	0.833637	6.88675	8.80235e-05	0.00141891
109212	Pimreg	PICALM interacting mitotic regulator	0.716322	6.88626	8.80701e-05	0.00141891
18769	Pkig	protein kinase inhibitor, gamma	0.539534	6.88296	8.83836e-05	0.00142193
170644	Ubn1	ubinuclein 1	0.577346	6.87987	8.86792e-05	0.00142466
57748	Jmy	junction-mediating and regulatory protein	0.77959	6.87419	8.92234e-05	0.00142934
56690	Mlycd	malonyl-CoA decarboxylase	0.874502	6.86599	9.00172e-05	0.00143774
74840	Manf	mesencephalic astrocyte-derived neurotrophic factor	0.694865	6.8656	9.00553e-05	0.00143774
72170	Chchd4	coiled-coil-helix-coiled-coil-helix domain containing 4	0.783746	6.86484	9.01287e-05	0.00143774
13204	Dhx15	DEAH (Asp-Glu-Ala-His) box polypeptide 15	0.56242	6.82558	9.40421e-05	0.00148456
52118	Pvr	poliovirus receptor	0.571778	6.82078	9.45331e-05	0.00148702
71733	Susd2	sushi domain containing 2	0.225187	6.8172	9.49003e-05	0.0014887
211286	Cln5	ceroid-lipofuscinosis, neuronal 5	0.728164	6.80144	9.654e-05	0.00150366
24086	Tlk2	tousled-like kinase 2 (Arabidopsis)	0.77361	6.79355	9.73715e-05	0.00151066
19181	Psmc2	proteasome (prosome, macropain) 26S subunit, ATPase 2	0.696361	6.7703	9.98699e-05	0.00154097
104027	Synpo	synaptopodin	0.335085	6.76738	0.000100188	0.00154378
108943	Trmt10a	tRNA methyltransferase 10A	0.237617	6.75148	0.000101944	0.00156656
66214	Rgcc	regulator of cell cycle	1.24561	6.74232	0.00010297	0.00157804
22381	Tceal9	transcription elongation factor A like 9	0.990377	6.74081	0.000103141	0.00157851
11491	Adam17	a disintegrin and metallopeptidase domain 17	0.758764	6.73426	0.000103883	0.00158232
241296	Lrrc8a	leucine rich repeat containing 8A VRAC subunit A	0.595114	6.73412	0.000103899	0.00158232
329504	Lcmt2	leucine carboxyl methyltransferase 2	1.05683	6.73275	0.000104054	0.00158232
223753	Cerk	ceramide kinase	0.514446	6.73245	0.000104089	0.00158232
20018	Polr1d	polymerase (RNA) I polypeptide D	0.545622	6.72652	0.000104768	0.00159042
56426	Pdcd10	programmed cell death 10	0.884503	6.71849	0.000105695	0.001596
239510	Phf20l1	PHD finger protein 20-like 1	0.705448	6.71521	0.000106075	0.00159962
64138	Ctsz	cathepsin Z	1.40353	6.6903	0.000109018	0.00163528
232370	Clstn3	calsyntenin 3	1.05695	6.68701	0.000109414	0.00163903
67166	Arl8b	ADP-ribosylation factor-like 8B	0.525648	6.66623	0.000111948	0.00167036
12916	Crem	cAMP responsive element modulator	0.992629	6.66253	0.000112406	0.00167476
67897	Rnmt	RNA (guanine-7-) methyltransferase	0.795875	6.66146	0.000112539	0.00167476
217207	Dhx8	DEAH (Asp-Glu-Ala-His) box polypeptide 8	0.644673	6.65795	0.000112976	0.00167905
11605	Gla	galactosidase, alpha	0.702475	6.65355	0.000113526	0.00167939
27225	Ddx24	DEAD (Asp-Glu-Ala-Asp) box polypeptide 24	0.61518	6.6519	0.000113734	0.00167939
16172	Il17ra	interleukin 17 receptor A	0.433425	6.6471	0.000114338	0.00168161
226352	Epb41l5	erythrocyte membrane protein band 4.1 like 5	0.669864	6.63401	0.000116006	0.00169952
18218	Dusp8	dual specificity phosphatase 8	0.708394	6.62401	0.000117298	0.001714
76559	Atg2b	autophagy related 2B	0.717535	6.61432	0.000118565	0.00172805
22256	Ung	uracil DNA glycosylase	0.971175	6.60408	0.000119919	0.00174131
67556	Pigm	phosphatidylinositol glycan anchor biosynthesis, class M	0.495305	6.60011	0.000120449	0.00174428
21969	Top1	topoisomerase (DNA) I	0.414087	6.59727	0.00012083	0.00174755
67010	Rbm7	RNA binding motif protein 7	0.658077	6.58915	0.000121926	0.00175891
245945	Rbm47	RNA binding motif protein 47	0.710668	6.58517	0.000122467	0.00176222
74559	Elovl7	ELOVL family member 7, elongation of long chain fatty acids (yeast)	0.113814	6.58248	0.000122835	0.00176229
54214	Golga4	golgi autoantigen, golgin subfamily a, 4	0.886954	6.57794	0.000123456	0.00176564
100732	Mapre3	microtubule-associated protein, RP/EB family, member 3	0.688095	6.57662	0.000123638	0.00176564
80289	Lysmd3	LysM, putative peptidoglycan-binding, domain containing 3	0.882827	6.57659	0.000123642	0.00176564
74318	Hopx	HOP homeobox	0.773958	6.57183	0.000124299	0.00177279
107589	Mylk	myosin, light polypeptide kinase	0.991241	6.5618	0.000125697	0.00178597
70380	Mospd1	motile sperm domain containing 1	0.764055	6.5301	0.00013023	0.00182742
17113	M6pr	mannose-6-phosphate receptor, cation dependent	0.394185	6.52707	0.000130671	0.00183134
21763	Tex2	testis expressed gene 2	0.915619	6.51193	0.000132908	0.00183846
240913	Adamts4	a disintegrin-like and metallopeptidase (reprolysin type) with thrombospondin type 1 motif, 4	0.191481	6.51153	0.000132967	0.00183846
98417	Cnih4	cornichon family AMPA receptor auxiliary protein 4	0.46785	6.50627	0.000133753	0.00184554
74718	Snx16	sorting nexin 16	0.701549	6.50592	0.000133806	0.00184554
100019	Mdn1	midasin AAA ATPase 1	0.626624	6.50185	0.000134419	0.00185091
26356	Ing1	inhibitor of growth family, member 1	0.539091	6.50117	0.000134522	0.00185091
216011	Lrrc20	leucine rich repeat containing 20	1.10505	6.48679	0.000136713	0.00187194
83431	Ndel1	nudE neurodevelopment protein 1 like 1	0.784581	6.47933	0.000137865	0.0018821
26410	Map3k8	mitogen-activated protein kinase kinase kinase 8	0.753498	6.47777	0.000138107	0.0018821
78889	Wsb1	WD repeat and SOCS box-containing 1	0.620124	6.47501	0.000138538	0.0018821
55989	Nop58	NOP58 ribonucleoprotein	0.961053	6.4668	0.000139824	0.0018939
67948	Fbxo28	F-box protein 28	0.943089	6.46204	0.000140575	0.0019018
72750	Fam117b	family with sequence similarity 117, member B	0.779497	6.44893	0.00014267	0.00191753
12035	Bcat1	branched chain aminotransferase 1, cytosolic	0.167848	6.44345	0.000143556	0.00192175
225010	Lclat1	lysocardiolipin acyltransferase 1	0.912337	6.44269	0.00014368	0.00192175
19352	Rabggtb	Rab geranylgeranyl transferase, b subunit	1.04614	6.44226	0.000143749	0.00192175
170736	Parvb	parvin, beta	0.404123	6.42418	0.000146719	0.00194993
16007	Ccn1	cellular communication network factor 1	1.15231	6.39155	0.000152249	0.00199189
75750	Slc10a6	solute carrier family 10 (sodium/bile acid cotransporter family), member 6	0.771455	6.38752	0.000152949	0.00199731
13722	Aimp1	aminoacyl tRNA synthetase complex-interacting multifunctional protein 1	0.455399	6.35141	0.000159369	0.00206556
75751	Ipo4	importin 4	0.61613	6.33982	0.000161492	0.00208978
15369	Hmox2	heme oxygenase 2	1.06194	6.33517	0.000162353	0.00209852
71268	Lrrfip2	leucine rich repeat (in FLII) interacting protein 2	0.723782	6.3323	0.000162885	0.00210234
242521	Klhl9	kelch-like 9	0.455941	6.31562	0.000166024	0.00212895
23983	Pcbp1	poly(rC) binding protein 1	0.489493	6.30763	0.000167551	0.00214125
70349	Copb1	coatomer protein complex, subunit beta 1	0.65214	6.3015	0.000168734	0.00215393
114716	Spred2	sprouty-related EVH1 domain containing 2	0.507961	6.28357	0.000172244	0.00219625
20698	Sphk1	sphingosine kinase 1	0.278161	6.2796	0.000173032	0.00220134
77644	C330007P06Rik	RIKEN cDNA C330007P06 gene	0.493979	6.27239	0.000174471	0.00221575
63958	Ube4b	ubiquitination factor E4B	0.714068	6.27197	0.000174556	0.00221575
94242	Tinagl1	tubulointerstitial nephritis antigen-like 1	1.46624	6.26933	0.000175088	0.00221716
67581	Tbc1d23	TBC1 domain family, member 23	0.804043	6.2685	0.000175255	0.00221716
18141	Nup50	nucleoporin 50	0.517812	6.26518	0.000175926	0.00222315
67603	Dusp6	dual specificity phosphatase 6	2.02244	6.26306	0.000176356	0.0022261
54473	Tollip	toll interacting protein	0.76259	6.24381	0.000180314	0.00226343
11765	Ap1g1	adaptor protein complex AP-1, gamma 1 subunit	0.591787	6.23662	0.000181818	0.00227978
93790	Nipa2	non imprinted in Prader-Willi/Angelman syndrome 2 homolog (human)	0.449478	6.23556	0.00018204	0.00228003
19338	Rab33b	RAB33B, member RAS oncogene family	0.509188	6.21886	0.00018559	0.00231425
230125	Slc25a51	solute carrier family 25, member 51	0.667445	6.20933	0.000187649	0.00233478
15381	Hnrnpc	heterogeneous nuclear ribonucleoprotein C	0.481537	6.20019	0.000189648	0.00235446
17714	Grpel2	GrpE-like 2, mitochondrial	0.725047	6.19885	0.000189944	0.00235555
17119	Mxd1	MAX dimerization protein 1	0.363691	6.18916	0.000192091	0.00237203
223697	Sun2	Sad1 and UNC84 domain containing 2	0.927411	6.16987	0.000196447	0.0024124
14997	H2-M9	histocompatibility 2, M region locus 9	0.767637	6.16358	0.00019789	0.00242143
70047	Trnt1	tRNA nucleotidyl transferase, CCA-adding, 1	0.475437	6.16211	0.000198229	0.00242143
20740	Sptan1	spectrin alpha, non-erythrocytic 1	0.819835	6.16201	0.000198253	0.00242143
30960	Vapa	vesicle-associated membrane protein, associated protein A	0.66695	6.14515	0.000202187	0.0024615
12321	Calu	calumenin	0.494186	6.14175	0.000202989	0.00246596
57444	Isg20	interferon-stimulated protein	0.559634	6.1292	0.000205989	0.00248272
229003	Helz2	helicase with zinc finger 2, transcriptional coactivator	0.643746	6.12836	0.00020619	0.00248272
15525	Hspa4	heat shock protein 4	0.743892	6.12382	0.000207286	0.0024914
239217	Kctd12	potassium channel tetramerisation domain containing 12	0.568639	6.11167	0.000210256	0.00251374
22083	Ctr9	CTR9 homolog, Paf1/RNA polymerase II complex component	0.614959	6.1036	0.000212252	0.00252958
65115	Bean1	brain expressed, associated with Nedd4, 1	0.162076	6.08191	0.000217723	0.00257746
66277	Klf15	Kruppel-like factor 15	1.07895	6.07958	0.000218321	0.00257746
320204	Etfbkmt	electron transfer flavoprotein beta subunit lysine methyltransferase	0.671781	6.07032	0.000220709	0.00259753
94044	Bcl2l13	BCL2-like 13 (apoptosis facilitator)	0.566974	6.06219	0.000222831	0.00261434
14007	Celf2	CUGBP, Elav-like family member 2	0.498629	6.04209	0.000228174	0.00265773
57814	Kcne4	potassium voltage-gated channel, Isk-related subfamily, gene 4	0.893032	6.03789	0.000229308	0.00266819
16569	Kif3b	kinesin family member 3B	0.428909	6.03137	0.000231079	0.00268603
107934	Celsr3	cadherin, EGF LAG seven-pass G-type receptor 3	0.187698	6.02821	0.000231942	0.00268778
12804	Cntfr	ciliary neurotrophic factor receptor	1.05849	6.02274	0.000233449	0.00270246
14538	Gcnt2	glucosaminyl (N-acetyl) transferase 2, I-branching enzyme	0.742379	6.0001	0.000239791	0.00275333
14062	F2r	coagulation factor II (thrombin) receptor	0.972716	5.99398	0.000241535	0.00277055
109263	Rlf	rearranged L-myc fusion sequence	0.53262	5.98837	0.000243149	0.00278623
20965	Syn2	synapsin II	0.837204	5.98505	0.000244109	0.0027944
70369	Bag5	BCL2-associated athanogene 5	0.53895	5.98251	0.000244847	0.00280002
18607	Pdpk1	3-phosphoinositide dependent protein kinase 1	0.820164	5.97699	0.000246456	0.00281273
171282	Acot4	acyl-CoA thioesterase 4	0.921514	5.97257	0.000247757	0.00282472
13730	Emp1	epithelial membrane protein 1	0.905757	5.96546	0.000249858	0.00283439
71978	Ppp2r2a	protein phosphatase 2, regulatory subunit B, alpha	0.666979	5.95117	0.000254147	0.00286867
433702	Ncbp1	nuclear cap binding protein subunit 1	0.676201	5.94179	0.000257004	0.00288979
228136	Zdhhc5	zinc finger, DHHC domain containing 5	0.444939	5.94167	0.00025704	0.00288979
18008	Nes	nestin	0.608752	5.93648	0.000258638	0.00289623
14387	Gaa	glucosidase, alpha, acid	0.690618	5.9356	0.00025891	0.00289641
319880	Tmcc3	transmembrane and coiled coil domains 3	0.64608	5.93343	0.000259581	0.00290105
18035	Nfkbia	nuclear factor of kappa light polypeptide gene enhancer in B cells inhibitor, alpha	0.950121	5.92851	0.000261111	0.00291239
22782	Slc30a1	solute carrier family 30 (zinc transporter), member 1	0.7695	5.92377	0.000262595	0.00292606
28185	Tomm70a	translocase of outer mitochondrial membrane 70A	0.554792	5.91375	0.000265761	0.00294971
74570	Zkscan1	zinc finger with KRAB and SCAN domains 1	0.356232	5.89675	0.000271225	0.00299274
66410	Mterf3	mitochondrial transcription termination factor 3	0.647534	5.89165	0.000272889	0.00300231
13011	Cst7	cystatin F (leukocystatin)	1.68248	5.87814	0.000277351	0.00302885
17210	Mcl1	myeloid cell leukemia sequence 1	0.628919	5.87602	0.000278056	0.00303261
75778	Them4	thioesterase superfamily member 4	0.782906	5.86105	0.000283107	0.00307288
56382	Rab9	RAB9, member RAS oncogene family	0.685714	5.85994	0.000283488	0.00307298
26380	Esrrb	estrogen related receptor, beta	0.50728	5.85547	0.000285018	0.00307298
16600	Klf4	Kruppel-like factor 4 (gut)	0.850985	5.85369	0.000285629	0.00307664
23807	Arih2	ariadne RBR E3 ubiquitin protein ligase 2	0.502706	5.84339	0.000289194	0.00310911
64899	Lpin3	lipin 3	0.63029	5.83769	0.000291191	0.00311872
11928	Atp1a1	ATPase, Na+/K+ transporting, alpha 1 polypeptide	1.07799	5.83234	0.000293077	0.00312877
22375	Wars	tryptophanyl-tRNA synthetase	0.67274	5.77912	0.000312584	0.00328257
20019	Polr1a	polymerase (RNA) I polypeptide A	0.554734	5.7727	0.000315028	0.0033021
63955	Cables1	CDK5 and Abl enzyme substrate 1	0.783164	5.76459	0.000318152	0.0033256
101214	Tra2a	transformer 2 alpha	0.799925	5.75871	0.000320435	0.00333405
20133	Rrm1	ribonucleotide reductase M1	0.718826	5.75624	0.0003214	0.00333796
13117	Cyp4a10	cytochrome P450, family 4, subfamily a, polypeptide 10	0.542534	5.75462	0.000322035	0.00334149
98053	Gtf2f1	general transcription factor IIF, polypeptide 1	0.529626	5.73587	0.000329477	0.00340309
94093	Trim33	tripartite motif-containing 33	0.256321	5.73152	0.000331234	0.00341493
17289	Mertk	MER proto-oncogene tyrosine kinase	0.561766	5.72472	0.000333993	0.00343405
73373	Phospho2	phosphatase, orphan 2	0.89416	5.71777	0.000336842	0.00345393
219257	Pcdh20	protocadherin 20	0.247732	5.71633	0.000337438	0.0034569
50790	Acsl4	acyl-CoA synthetase long-chain family member 4	0.440257	5.70281	0.000343064	0.00350186
20648	Snta1	syntrophin, acidic 1	1.35084	5.69639	0.000345773	0.00351884
66390	Prelid3b	PRELI domain containing 3B	0.767456	5.66405	0.000359774	0.00362015
22592	Ercc5	excision repair cross-complementing rodent repair deficiency, complementation group 5	0.54655	5.64536	0.00036815	0.0036913
11906	Zfhx3	zinc finger homeobox 3	0.536488	5.64349	0.000368999	0.00369649
20439	Siah2	siah E3 ubiquitin protein ligase 2	0.601972	5.63474	0.000373002	0.00371688
13350	Dgat1	diacylglycerol O-acyltransferase 1	0.791026	5.61416	0.000382604	0.00378919
69807	Trim32	tripartite motif-containing 32	0.626538	5.58615	0.000396108	0.00390243
12753	Clock	circadian locomotor output cycles kaput	0.717163	5.57546	0.000401396	0.00394421
67526	Atg12	autophagy related 12	0.814946	5.56647	0.000405908	0.0039713
212398	Frat2	frequently rearranged in advanced T cell lymphomas 2	0.561762	5.54008	0.000419459	0.00407711
13663	Ei24	etoposide induced 2.4 mRNA	0.557923	5.5398	0.000419608	0.00407711
30930	Vps26a	VPS26 retromer complex component A	0.662724	5.53694	0.000421105	0.00408465
107503	Atf5	activating transcription factor 5	0.827738	5.52293	0.000428534	0.00414249
71955	Ist1	increased sodium tolerance 1 homolog (yeast)	0.773282	5.52012	0.00043004	0.00414996
12909	Crcp	calcitonin gene-related peptide-receptor component protein	0.729894	5.51823	0.000431056	0.00415622
67040	Ddx17	DEAD (Asp-Glu-Ala-Asp) box polypeptide 17	0.790987	5.51406	0.000433307	0.00417037
19324	Rab1a	RAB1A, member RAS oncogene family	0.743268	5.51347	0.00043363	0.00417037
12608	Cebpb	CCAAT/enhancer binding protein (C/EBP), beta	0.762289	5.49533	0.000443586	0.00424446
56758	Mbnl1	muscleblind like splicing factor 1	0.684037	5.49212	0.000445375	0.00425665
11909	Atf2	activating transcription factor 2	0.516826	5.49169	0.000445613	0.00425665
75316	Taf1d	TATA-box binding protein associated factor, RNA polymerase I, D	0.725524	5.48912	0.000447052	0.00425961
217365	Nploc4	NPL4 homolog, ubiquitin recognition factor	1.06382	5.48441	0.000449702	0.00427643
215160	Rhbdd2	rhomboid domain containing 2	0.410704	5.48354	0.000450193	0.00427643
22019	Tpp2	tripeptidyl peptidase II	0.598674	5.48247	0.000450794	0.00427725
11838	Arc	activity regulated cytoskeletal-associated protein	0.848168	5.47858	0.000453002	0.00429352
216821	Tmem11	transmembrane protein 11	0.478757	5.4715	0.000457047	0.00431227
22134	Tgoln1	trans-golgi network protein	0.645006	5.46133	0.000462924	0.00434856
17528	Mpz	myelin protein zero	0.591941	5.45051	0.000469266	0.00438991
76867	Rhbdd1	rhomboid domain containing 1	0.600164	5.43666	0.000477527	0.00444879
69237	Gtpbp4	GTP binding protein 4	0.691383	5.42936	0.000481945	0.00448256
231002	Plekhn1	pleckstrin homology domain containing, family N member 1	0.773099	5.42573	0.000484161	0.00449804
18491	Pappa	pregnancy-associated plasma protein A	0.471468	5.42533	0.000484405	0.00449804
18613	Pecam1	platelet/endothelial cell adhesion molecule 1	0.846819	5.42352	0.000485512	0.00450463
104416	Bap1	Brca1 associated protein 1	0.583629	5.41837	0.000488684	0.00451989
66930	Fank1	fibronectin type 3 and ankyrin repeat domains 1	0.358215	5.41035	0.000493659	0.00455681
108954	Ppp1r15b	protein phosphatase 1, regulatory subunit 15B	0.595282	5.40925	0.000494345	0.00455681
228361	Ambra1	autophagy/beclin 1 regulator 1	0.348829	5.40783	0.000495238	0.00455748
228607	Mavs	mitochondrial antiviral signaling protein	0.792777	5.40477	0.000497159	0.00455951
269424	Jade1	jade family PHD finger 1	0.57209	5.40426	0.000497474	0.00455951
65103	Arl6ip6	ADP-ribosylation factor-like 6 interacting protein 6	0.41014	5.40348	0.000497966	0.00456032
75678	Ippk	inositol 1,3,4,5,6-pentakisphosphate 2-kinase	0.454376	5.40063	0.000499771	0.00457314
11798	Xiap	X-linked inhibitor of apoptosis	0.381508	5.39559	0.000502967	0.00459496
223775	Pim3	proviral integration site 3	0.950425	5.38603	0.000509099	0.00462738
67996	Srsf6	serine/arginine-rich splicing factor 6	0.605298	5.38324	0.0005109	0.00463091
13609	S1pr1	sphingosine-1-phosphate receptor 1	0.899277	5.37447	0.000516618	0.00466317
67973	Mphosph10	M-phase phosphoprotein 10 (U3 small nucleolar ribonucleoprotein)	0.605222	5.36258	0.000524482	0.00471909
67958	U2surp	U2 snRNP-associated SURP domain containing	0.430854	5.35376	0.000530398	0.00475926
56480	Tbk1	TANK-binding kinase 1	0.883155	5.35341	0.00053063	0.00475926
13618	Ednrb	endothelin receptor type B	0.596181	5.35024	0.000532779	0.00477097
12469	Cct8	chaperonin containing Tcp1, subunit 8 (theta)	0.720267	5.34909	0.000533559	0.0047733
67889	Rbm18	RNA binding motif protein 18	0.612997	5.34267	0.000537937	0.00478818
12848	Cops2	COP9 signalosome subunit 2	0.60191	5.34013	0.000539685	0.0047972
217342	Ube2o	ubiquitin-conjugating enzyme E2O	0.625051	5.33912	0.000540374	0.0047972
72098	Tmem68	transmembrane protein 68	0.339917	5.33635	0.00054229	0.00480666
212528	Trmt1	tRNA methyltransferase 1	0.425128	5.33427	0.000543727	0.00481562
109900	Asl	argininosuccinate lyase	0.881059	5.33334	0.000544376	0.00481713
80888	Hspb8	heat shock protein 8	1.13112	5.32973	0.000546889	0.00482097
218811	Sec24c	Sec24 related gene family, member C (S. cerevisiae)	0.613741	5.32907	0.000547344	0.00482123
68501	Nsmce2	NSE2/MMS21 homolog, SMC5-SMC6 complex SUMO ligase	0.788888	5.31401	0.000557977	0.00490725
80886	Senp3	SUMO/sentrin specific peptidase 3	0.526502	5.31263	0.000558957	0.00491205
213109	Phf3	PHD finger protein 3	0.547375	5.30644	0.000563402	0.00494347
99650	4933434E20Rik	RIKEN cDNA 4933434E20 gene	0.507741	5.30368	0.000565395	0.00494557
227937	Pkp4	plakophilin 4	0.534229	5.29528	0.000571505	0.00498744
69627	Fam89a	family with sequence similarity 89, member A	0.502339	5.29101	0.000574642	0.00501095
52696	Zwint	ZW10 interactor	0.933683	5.28866	0.000576369	0.00501929
13025	Ctla2b	cytotoxic T lymphocyte-associated protein 2 beta	1.2521	5.28851	0.000576486	0.00501929
140630	Ube4a	ubiquitination factor E4A	0.522229	5.27749	0.000584684	0.00507115
85031	Pla1a	phospholipase A1 member A	0.962596	5.26993	0.000590388	0.00510745
193740	Hspa1a	heat shock protein 1A	1.13473	5.26745	0.000592274	0.00511345
225131	Wac	WW domain containing adaptor with coiled-coil	0.465752	5.26358	0.000595226	0.00513501
193116	Slu7	SLU7 splicing factor homolog (S. cerevisiae)	0.401105	5.25546	0.000601473	0.00516527
19108	Prkx	protein kinase, X-linked	0.435359	5.24793	0.000607323	0.00519971
76763	Mospd2	motile sperm domain containing 2	0.426322	5.2446	0.000609938	0.00521507
76707	Clasp1	CLIP associating protein 1	0.517406	5.24447	0.000610038	0.00521507
191578	Helq	helicase, POLQ-like	0.482384	5.23507	0.000617469	0.00527062
404634	H2afy2	H2A histone family, member Y2	0.653761	5.23417	0.000618185	0.00527195
99480	Dnttip2	deoxynucleotidyltransferase, terminal, interacting protein 2	0.557968	5.22793	0.000623179	0.0052914
218121	Mboat1	membrane bound O-acyltransferase domain containing 1	0.210403	5.22162	0.000628277	0.00532669
67469	Abhd5	abhydrolase domain containing 5	0.739399	5.21845	0.000630853	0.00534453
217995	Heatr1	HEAT repeat containing 1	0.520065	5.21346	0.000634934	0.00537106
53872	Caprin1	cell cycle associated protein 1	0.522186	5.20708	0.000640194	0.00540746
70984	4931406C07Rik	RIKEN cDNA 4931406C07 gene	0.664248	5.20449	0.000642341	0.00542155
19359	Rad23b	RAD23 homolog B, nucleotide excision repair protein	0.442139	5.19687	0.000648706	0.00546711
217039	Ggnbp2	gametogenetin binding protein 2	0.549422	5.19292	0.000652034	0.00549106
98258	Txndc9	thioredoxin domain containing 9	0.478559	5.19065	0.000653946	0.00549898
16169	Il15ra	interleukin 15 receptor, alpha chain	0.521811	5.18682	0.000657202	0.00552225
14312	Brd2	bromodomain containing 2	0.385581	5.17663	0.000665941	0.00554213
17135	Mafk	v-maf musculoaponeurotic fibrosarcoma oncogene family, protein K (avian)	0.785404	5.17631	0.000666224	0.00554213
110109	Nop2	NOP2 nucleolar protein	0.856543	5.17417	0.000668072	0.00554998
12826	Col4a1	collagen, type IV, alpha 1	1.00036	5.17385	0.000668353	0.00554998
75826	Senp2	SUMO/sentrin specific peptidase 2	0.536509	5.16725	0.000674105	0.00558544
78248	Armcx1	armadillo repeat containing, X-linked 1	0.479625	5.16096	0.000679633	0.005623
93671	Cd163	CD163 antigen	0.607311	5.15772	0.0006825	0.00563487
26445	Psmb2	proteasome (prosome, macropain) subunit, beta type 2	0.405014	5.14716	0.000691939	0.00569565
80281	Cttnbp2nl	CTTNBP2 N-terminal like	0.492297	5.13936	0.000699001	0.00574856
26919	Zfp346	zinc finger protein 346	0.732011	5.13782	0.000700408	0.00574863
19735	Rgs2	regulator of G-protein signaling 2	1.6801	5.12208	0.000714934	0.00583819
105203	Tasor2	transcription activation suppressor family member 2	0.540886	5.10002	0.00073584	0.00598299
70495	Atp6ap2	ATPase, H+ transporting, lysosomal accessory protein 2	0.640971	5.09914	0.000736686	0.00598557
23849	Klf6	Kruppel-like factor 6	0.632942	5.09229	0.000743326	0.00602222
24010	Ik	IK cytokine	0.563167	5.07862	0.000756761	0.00611355
15081	H3f3b	H3 histone, family 3B	0.581944	5.06104	0.000774419	0.0062295
83885	Slc25a2	solute carrier family 25 (mitochondrial carrier, ornithine transporter) member 2	0.351961	5.0588	0.000776703	0.00623874
100336	Ppp1r8	protein phosphatase 1, regulatory subunit 8	0.662404	5.05829	0.000777222	0.00623874
75785	Klhl24	kelch-like 24	0.890311	5.04636	0.000789515	0.00629275
67657	Rabl3	RAB, member RAS oncogene family-like 3	0.481019	5.03949	0.000796689	0.00633654
56085	Ubqln1	ubiquilin 1	0.572947	5.03735	0.000798939	0.00634997
12461	Cct2	chaperonin containing Tcp1, subunit 2 (beta)	0.715216	5.02785	0.000808999	0.0064209
67035	Dnajb4	DnaJ heat shock protein family (Hsp40) member B4	0.390315	5.01767	0.000819941	0.00648953
14359	Fxr1	fragile X mental retardation gene 1, autosomal homolog	0.528124	5.01127	0.000826899	0.00653554
230700	Foxj3	forkhead box J3	0.409671	5.01126	0.00082691	0.00653554
13614	Edn1	endothelin 1	0.457588	5.00385	0.000835051	0.00658136
56809	Gmeb1	glucocorticoid modulatory element binding protein 1	0.284531	5.00174	0.000837383	0.00659067
67769	Gpatch2	G patch domain containing 2	0.517788	4.99322	0.000846872	0.00664497
69276	Sec62	SEC62 homolog (S. cerevisiae)	0.309796	4.98227	0.00085924	0.00672061
232853	Zfp954	zinc finger protein 954	0.397163	4.97592	0.000866503	0.00675896
65020	Zfp110	zinc finger protein 110	0.608847	4.9759	0.000866534	0.00675896
16478	Jund	jun D proto-oncogene	0.650545	4.9749	0.000867676	0.00676321
54672	Adgrg3	adhesion G protein-coupled receptor G3	0.256054	4.96579	0.000878233	0.00682615
70356	St13	suppression of tumorigenicity 13	0.584518	4.9525	0.000893881	0.00691032
72344	Usp36	ubiquitin specific peptidase 36	0.484031	4.94428	0.000903705	0.00696086
228775	Trib3	tribbles pseudokinase 3	1.10945	4.93817	0.000911088	0.00699664
227331	Gigyf2	GRB10 interacting GYF protein 2	0.463412	4.93389	0.000916289	0.00702592
19185	Psmd4	proteasome (prosome, macropain) 26S subunit, non-ATPase, 4	0.727889	4.93016	0.000920861	0.00705619
13120	Cyp4b1	cytochrome P450, family 4, subfamily b, polypeptide 1	2.08937	4.9267	0.000925116	0.0070792
20305	Ccl6	chemokine (C-C motif) ligand 6	1.56403	4.9261	0.000925849	0.00708002
14828	Hspa5	heat shock protein 5	0.59377	4.92232	0.000930527	0.0070966
108160	Fam50a	family with sequence similarity 50, member A	0.62604	4.90586	0.000951208	0.00722509
75705	Eif4b	eukaryotic translation initiation factor 4B	0.502362	4.90477	0.000952594	0.00723076
13424	Dync1h1	dynein cytoplasmic 1 heavy chain 1	0.538608	4.89601	0.000963818	0.00730126
100383	Bsdc1	BSD domain containing 1	0.591137	4.89073	0.000970648	0.00733825
11426	Macf1	microtubule-actin crosslinking factor 1	0.67489	4.88903	0.00097286	0.00735006
17873	Gadd45b	growth arrest and DNA-damage-inducible 45 beta	0.657551	4.88205	0.000981994	0.00740424
21679	Tead4	TEA domain family member 4	0.178003	4.881	0.000983383	0.00740484
102866	Pls3	plastin 3 (T-isoform)	0.41501	4.87974	0.00098504	0.00741237
22209	Ube2a	ubiquitin-conjugating enzyme E2A	0.357527	4.87174	0.000995661	0.00747737
74182	Gpcpd1	glycerophosphocholine phosphodiesterase 1	0.616234	4.86908	0.000999223	0.00749417
66664	Tmem41a	transmembrane protein 41a	0.70454	4.86017	0.00101124	0.00755122
18704	Pik3c2a	phosphatidylinositol-4-phosphate 3-kinase catalytic subunit type 2 alpha	0.450124	4.85517	0.00101805	0.00758509
59090	Midn	midnolin	0.359858	4.85211	0.00102225	0.00760136
70683	Utp20	UTP20 small subunit processome component	0.364829	4.84951	0.00102582	0.00761976
231452	Sdad1	SDA1 domain containing 1	0.443744	4.84933	0.00102607	0.00761976
226551	Suco	SUN domain containing ossification factor	0.449962	4.84846	0.00102728	0.0076237
224598	Zfp758	zinc finger protein 758	0.432579	4.84649	0.00103001	0.00763895
13548	Dyrk1a	dual-specificity tyrosine-(Y)-phosphorylation regulated kinase 1a	0.465695	4.84399	0.00103348	0.00765965
13709	Elf1	E74-like factor 1	0.355954	4.82986	0.00105332	0.00777614
56219	Extl1	exostoses (multiple)-like 1	0.609308	4.81738	0.00107119	0.00789285
12728	Clcn5	chloride channel, voltage-sensitive 5	0.370648	4.81604	0.00107313	0.00790177
50493	Txnrd1	thioredoxin reductase 1	0.726552	4.80091	0.00109529	0.00804395
11430	Acox1	acyl-Coenzyme A oxidase 1, palmitoyl	0.679517	4.79952	0.00109734	0.00805378
108829	Jmjd1c	jumonji domain containing 1C	0.512048	4.79698	0.00110112	0.00806062
12827	Col4a2	collagen, type IV, alpha 2	0.709907	4.79111	0.00110989	0.00810912
12814	Col11a1	collagen, type XI, alpha 1	0.039825	4.78387	0.00112082	0.00817307
20448	St6galnac4	ST6 (alpha-N-acetyl-neuraminyl-2,3-beta-galactosyl-1,3)-N-acetylgalactosaminide alpha-2,6-sialyltransferase 4	0.401098	4.77625	0.00113245	0.00824728
100662	D930016D06Rik	RIKEN cDNA D930016D06 gene	0.476126	4.76828	0.00114475	0.0083187
18036	Nfkbib	nuclear factor of kappa light polypeptide gene enhancer in B cells inhibitor, beta	0.626916	4.76168	0.00115505	0.00836959
17755	Map1b	microtubule-associated protein 1B	0.409058	4.75738	0.0011618	0.00838567
94220	Cnnm4	cyclin M4	0.248489	4.75736	0.00116183	0.00838567
26901	Ss18l2	SS18, nBAF chromatin remodeling complex subunit like 2	0.46912	4.7405	0.00118876	0.00854187
106326	Osbpl11	oxysterol binding protein-like 11	0.723635	4.73853	0.00119195	0.00855754
13669	Eif3a	eukaryotic translation initiation factor 3, subunit A	0.521114	4.73776	0.00119321	0.00855754
66352	Blzf1	basic leucine zipper nuclear factor 1	0.414356	4.73539	0.00119707	0.00857975
213539	Bag2	BCL2-associated athanogene 2	0.43498	4.7223	0.0012186	0.00868452
11443	Chrnb1	cholinergic receptor, nicotinic, beta polypeptide 1 (muscle)	0.64376	4.71812	0.00122556	0.00872316
223601	Fam49b	family with sequence similarity 49, member B	0.729264	4.70864	0.00124152	0.00882007
22757	Zkscan5	zinc finger with KRAB and SCAN domains 5	0.306205	4.69179	0.00127042	0.00898588
16588	Kin	Kin17 DNA and RNA binding protein	0.632108	4.68871	0.00127579	0.00900137
18988	Pou2f3	POU domain, class 2, transcription factor 3	0.156068	4.6862	0.00128017	0.00901993
56298	Atl2	atlastin GTPase 2	1.04067	4.68538	0.00128161	0.00901993
22215	Ube3a	ubiquitin protein ligase E3A	0.308782	4.67683	0.0012967	0.00909214
53332	Mtmr1	myotubularin related protein 1	0.377855	4.67217	0.00130499	0.00912538
66087	Emc3	ER membrane protein complex subunit 3	0.516324	4.66833	0.0013119	0.00915376
110454	Ly6a	lymphocyte antigen 6 complex, locus A	0.801259	4.6651	0.00131771	0.00918824
17246	Mdm2	transformed mouse 3T3 cell double minute 2	0.475863	4.66351	0.00132059	0.00920179
66309	Tmem128	transmembrane protein 128	0.491761	4.66313	0.00132128	0.00920179
224794	Enpp4	ectonucleotide pyrophosphatase/phosphodiesterase 4	0.57451	4.65797	0.00133066	0.00923863
27406	Abcf3	ATP-binding cassette, sub-family F (GCN20), member 3	0.590817	4.64489	0.00135478	0.00936014
22151	Tubb2a	tubulin, beta 2A class IIA	0.837334	4.64391	0.00135661	0.0093671
67246	Resf1	retroelement silencing factor 1	1.10915	4.64019	0.00136357	0.00940093
230157	Tmeff1	transmembrane protein with EGF-like and two follistatin-like domains 1	0.486257	4.63952	0.00136482	0.00940093
56338	Txnip	thioredoxin interacting protein	1.20659	4.6337	0.00137578	0.0094548
16798	Lats1	large tumor suppressor	0.404353	4.63359	0.001376	0.0094548
110957	D1Pas1	DNA segment, Chr 1, Pasteur Institute 1	0.437486	4.63099	0.00138092	0.00947133
269180	Inpp4a	inositol polyphosphate-4-phosphatase, type I	0.295536	4.62837	0.00138591	0.00949979
22695	Zfp36	zinc finger protein 36	0.721927	4.61392	0.00141379	0.00966159
234678	D230025D16Rik	RIKEN cDNA D230025D16 gene	0.71934	4.61157	0.00141837	0.00968706
76932	Arfip2	ADP-ribosylation factor interacting protein 2	0.516657	4.609	0.0014234	0.00971554
66552	Sppl2a	signal peptide peptidase like 2A	0.603704	4.59174	0.00145773	0.0098902
27277	Golga5	golgi autoantigen, golgin subfamily a, 5	0.649111	4.58593	0.0014695	0.00992909
108837	Ibtk	inhibitor of Bruton agammaglobulinemia tyrosine kinase	0.351315	4.58574	0.00146989	0.00992909
22025	Nr2c1	nuclear receptor subfamily 2, group C, member 1	0.394481	4.58079	0.00147998	0.0099872
19012	Plpp1	phospholipid phosphatase 1	0.833309	4.57933	0.00148298	0.0100015
104458	Rars	arginyl-tRNA synthetase	0.620946	4.57703	0.00148769	0.0100203
66580	Esf1	ESF1 nucleolar pre-rRNA processing protein homolog	0.487689	4.57414	0.00149365	0.010047
81000	Rad54l2	RAD54 like 2 (S. cerevisiae)	0.476459	4.57334	0.00149532	0.0100488
13089	Cyp2b13	cytochrome P450, family 2, subfamily b, polypeptide 13	0.742487	4.56948	0.00150334	0.0100907
100494	Zfand2a	zinc finger, AN1-type domain 2A	0.640886	4.56281	0.0015173	0.0101783
50877	Neu3	neuraminidase 3	0.503457	4.55366	0.00153667	0.01029
69104	2019-03-05	membrane-associated ring finger (C3HC4) 5	0.515111	4.55302	0.00153804	0.010293
17769	Mthfr	methylenetetrahydrofolate reductase	0.482967	4.55187	0.00154049	0.0102972
67123	Ubap1	ubiquitin-associated protein 1	0.296796	4.54625	0.00155255	0.010323
53608	Map3k6	mitogen-activated protein kinase kinase kinase 6	0.609178	4.545	0.00155526	0.0103309
18766	Pkdrej	polycystin (PKD) family receptor for egg jelly	0.257034	4.53821	0.00157001	0.0103946
108143	Taf9	TATA-box binding protein associated factor 9	0.559535	4.52587	0.00159718	0.0105305
72658	2700097O09Rik	RIKEN cDNA 2700097O09 gene	0.533111	4.52428	0.00160072	0.0105318
66164	Nip7	NIP7, nucleolar pre-rRNA processing protein	0.518333	4.52174	0.00160639	0.0105507
71336	Rbks	ribokinase	0.423457	4.51482	0.00162193	0.0106316
243272	Sbno1	strawberry notch 1	0.372992	4.51264	0.00162687	0.0106481
20516	Slc20a2	solute carrier family 20, member 2	0.517163	4.50935	0.00163436	0.0106847
72057	Phf10	PHD finger protein 10	0.793663	4.49506	0.00166726	0.010875
27226	Pla2g7	phospholipase A2, group VII (platelet-activating factor acetylhydrolase, plasma)	0.792651	4.488	0.00168377	0.0109571
22200	Uba3	ubiquitin-like modifier activating enzyme 3	0.32377	4.48693	0.00168631	0.0109643
15259	Hipk3	homeodomain interacting protein kinase 3	0.607519	4.48595	0.00168862	0.0109643
80837	Rhoj	ras homolog family member J	0.42538	4.48313	0.00169527	0.0109814
67453	Slc25a46	solute carrier family 25, member 46	0.470097	4.47674	0.0017105	0.011061
71994	Cnn3	calponin 3, acidic	0.653062	4.47614	0.00171193	0.011064
64602	Ireb2	iron responsive element binding protein 2	0.299053	4.47407	0.00171691	0.0110771
104009	Qsox1	quiescin Q6 sulfhydryl oxidase 1	0.307379	4.46227	0.00174549	0.0111976
20024	Sub1	SUB1 homolog, transcriptional regulator	0.447419	4.46133	0.00174779	0.0112055
11938	Atp2a2	ATPase, Ca++ transporting, cardiac muscle, slow twitch 2	0.776784	4.45618	0.00176046	0.0112682
74322	Cxxc1	CXXC finger 1 (PHD domain)	0.558145	4.44889	0.00177855	0.0113711
17187	Max	Max protein	0.433625	4.44813	0.00178045	0.0113768
18782	Pla2g2d	phospholipase A2, group IID	0.409829	4.44756	0.00178187	0.0113794
24066	Spry4	sprouty RTK signaling antagonist 4	1.05869	4.43023	0.00182578	0.0116205
207352	Sec23ip	Sec23 interacting protein	0.360449	4.42887	0.00182926	0.0116361
11484	Aspa	aspartoacylase	0.739891	4.42596	0.00183676	0.0116731
16924	Lnx1	ligand of numb-protein X 1	0.77084	4.42518	0.00183878	0.0116769
319277	Washc4	WASH complex subunit 4	0.544308	4.41724	0.00185944	0.0117882
229715	Amigo1	adhesion molecule with Ig like domain 1	0.570752	4.41624	0.00186204	0.0117982
16573	Kif5b	kinesin family member 5B	0.521848	4.41463	0.00186628	0.0118184
225055	Fbxo11	F-box protein 11	0.491949	4.40943	0.00187999	0.0118852
63953	Dusp10	dual specificity phosphatase 10	0.671751	4.40613	0.00188877	0.0119341
29812	Ndrg3	N-myc downstream regulated gene 3	0.608294	4.4038	0.00189496	0.0119532
71844	Nupl1	nucleoporin like 1	0.581482	4.39726	0.00191252	0.0120331
52440	Tax1bp1	Tax1 (human T cell leukemia virus type I) binding protein 1	0.445771	4.3964	0.00191486	0.0120331
27275	Nufip1	nuclear fragile X mental retardation protein interacting protein 1	0.485669	4.39636	0.00191495	0.0120331
80744	Cwc22	CWC22 spliceosome-associated protein	0.431259	4.39631	0.00191509	0.0120331
22327	Vbp1	von Hippel-Lindau binding protein 1	0.428681	4.3944	0.00192026	0.0120509
14595	B4galt1	UDP-Gal:betaGlcNAc beta 1,4- galactosyltransferase, polypeptide 1	0.433921	4.3879	0.00193794	0.0121363
224250	Cldnd1	claudin domain containing 1	0.83866	4.37629	0.00197001	0.0122962
70186	Fam162a	family with sequence similarity 162, member A	0.509632	4.37392	0.00197662	0.0123239
28081	Fam104a	family with sequence similarity 104, member A	0.5622	4.37316	0.00197873	0.0123292
66213	Med7	mediator complex subunit 7	0.570331	4.37274	0.00197992	0.0123292
260409	Cdc42ep3	CDC42 effector protein (Rho GTPase binding) 3	0.579377	4.37244	0.00198074	0.0123292
12464	Cct4	chaperonin containing Tcp1, subunit 4 (delta)	0.631907	4.36603	0.0019988	0.0124143
329252	Lgr6	leucine-rich repeat-containing G protein-coupled receptor 6	1.35212	4.36262	0.00200848	0.0124607
102247	Gpat4	glycerol-3-phosphate acyltransferase 4	0.895841	4.35606	0.00202721	0.0125416
12286	Cacna1a	calcium channel, voltage-dependent, P/Q type, alpha 1A subunit	0.162186	4.33932	0.00207588	0.0127599
67821	Atp1b4	ATPase, (Na+)/K+ transporting, beta 4 polypeptide	0.128713	4.33886	0.00207725	0.0127614
15500	Hsf2	heat shock factor 2	0.592111	4.33765	0.0020808	0.0127693
66609	Cryzl1	crystallin, zeta (quinone reductase)-like 1	0.393459	4.33466	0.00208967	0.012796
66997	Psmd12	proteasome (prosome, macropain) 26S subunit, non-ATPase, 12	0.589395	4.32769	0.00211044	0.0128953
11540	Adora2a	adenosine A2a receptor	0.746735	4.31919	0.00213612	0.01301
27267	Cars	cysteinyl-tRNA synthetase	0.479774	4.31522	0.00214821	0.0130695
72349	Dusp3	dual specificity phosphatase 3 (vaccinia virus phosphatase VH1-related)	0.519217	4.3092	0.00216667	0.0131535
20924	Supt5	suppressor of Ty 5, DSIF elongation factor subunit	0.812178	4.3037	0.0021837	0.0132498
110595	Timp4	tissue inhibitor of metalloproteinase 4	0.774371	4.30275	0.00218666	0.0132535
229731	Slc25a24	solute carrier family 25 (mitochondrial carrier, phosphate carrier), member 24	0.351266	4.29916	0.00219788	0.0133073
105351	AW209491	expressed sequence AW209491	0.56828	4.28971	0.00222768	0.0134517
15185	Hdac6	histone deacetylase 6	0.513787	4.28549	0.00224112	0.0135112
110157	Raf1	v-raf-leukemia viral oncogene 1	0.492	4.28335	0.00224798	0.0135381
68705	Gtf2f2	general transcription factor IIF, polypeptide 2	0.562079	4.27856	0.00226342	0.0136021
14824	Grn	granulin	0.620086	4.27505	0.00227478	0.0136559
319615	Zfp944	zinc finger protein 944	0.383201	4.27311	0.00228108	0.0136792
66105	Ube2d3	ubiquitin-conjugating enzyme E2D 3	0.24838	4.27072	0.0022889	0.0136933
106298	Rrn3	RRN3 RNA polymerase I transcription factor homolog (yeast)	0.510584	4.26743	0.00229969	0.0137326
21819	Tg	thyroglobulin	0.134451	4.2643	0.00230998	0.0137755
67222	Srfbp1	serum response factor binding protein 1	0.721804	4.25506	0.00234073	0.0139262
70381	Tecpr1	tectonin beta-propeller repeat containing 1	0.712061	4.25297	0.00234776	0.0139533
12455	Ccnt1	cyclin T1	0.564907	4.24931	0.00236007	0.0140108
100042165	BC005561	cDNA sequence BC005561	0.442594	4.24899	0.00236115	0.0140108
244886	Tmem266	transmembrane protein 266	0.22525	4.24317	0.00238091	0.0140985
64656	Mrps23	mitochondrial ribosomal protein S23	0.424058	4.23488	0.0024094	0.0142138
107071	Wdr74	WD repeat domain 74	0.649334	4.23458	0.00241043	0.0142138
60365	Rbm8a	RNA binding motif protein 8a	0.568616	4.23332	0.00241477	0.0142319
78825	Desi2	desumoylating isopeptidase 2	0.502565	4.23193	0.0024196	0.014253
69260	Ing2	inhibitor of growth family, member 2	0.379799	4.23134	0.00242167	0.0142577
211673	Arfgef1	ADP-ribosylation factor guanine nucleotide-exchange factor 1(brefeldin A-inhibited)	0.493711	4.23028	0.00242533	0.0142656
286940	Flnb	filamin, beta	0.485658	4.22986	0.00242682	0.0142657
78832	Cacul1	CDK2 associated, cullin domain 1	0.624494	4.22113	0.0024574	0.0144305
102162	Taf5l	TATA-box binding protein associated factor 5 like	0.333286	4.21827	0.0024675	0.0144598
68018	Col4a3bp	collagen, type IV, alpha 3 (Goodpasture antigen) binding protein	0.55001	4.21093	0.00249368	0.0145856
66960	Mindy3	MINDY lysine 48 deubiquitinase 3	0.45137	4.2108	0.00249413	0.0145856
12468	Cct7	chaperonin containing Tcp1, subunit 7 (eta)	0.577588	4.20797	0.00250432	0.0146244
21815	Tgif1	TGFB-induced factor homeobox 1	0.377068	4.20178	0.00252672	0.014723
13803	Enc1	ectodermal-neural cortex 1	0.529485	4.20043	0.00253162	0.0147363
216238	Eea1	early endosome antigen 1	0.437175	4.19832	0.00253934	0.0147736
68724	Arl8a	ADP-ribosylation factor-like 8A	0.668302	4.19245	0.00256087	0.0148759
67602	Necap1	NECAP endocytosis associated 1	0.32313	4.18869	0.0025748	0.0149262
57267	Apba3	amyloid beta (A4) precursor protein-binding, family A, member 3	0.59711	4.18688	0.00258151	0.0149574
68738	Acss1	acyl-CoA synthetase short-chain family member 1	0.723596	4.18307	0.00259573	0.0150309
212772	Arl14ep	ADP-ribosylation factor-like 14 effector protein	0.545438	4.17987	0.00260771	0.0150672
56351	Ptges3	prostaglandin E synthase 3	1.12473	4.1783	0.00261365	0.0150818
70351	Ppp4r1	protein phosphatase 4, regulatory subunit 1	0.242937	4.17579	0.00262313	0.0151134
18845	Plxna2	plexin A2	0.48267	4.16928	0.00264788	0.0152173
13836	Epha2	Eph receptor A2	0.386265	4.16842	0.00265118	0.0152284
26554	Cul3	cullin 3	0.39716	4.16688	0.00265708	0.0152546
66335	Atp6v1c1	ATPase, H+ transporting, lysosomal V1 subunit C1	0.467274	4.16646	0.00265869	0.0152561
226412	R3hdm1	R3H domain containing 1	0.299345	4.163	0.00267199	0.0153091
58233	Dnaja4	DnaJ heat shock protein family (Hsp40) member A4	0.680421	4.155	0.00270305	0.015448
20539	Slc7a5	solute carrier family 7 (cationic amino acid transporter, y+ system), member 5	0.220871	4.15195	0.00271502	0.0155042
28018	Ubfd1	ubiquitin family domain containing 1	0.305953	4.15144	0.00271701	0.0155042
53414	Bysl	bystin-like	0.551771	4.15023	0.00272177	0.0155236
100604	Lrrc8c	leucine rich repeat containing 8 family, member C	0.306117	4.14704	0.00273436	0.0155718
11758	Prdx6	peroxiredoxin 6	0.694088	4.14348	0.00274847	0.0156097
72567	Bclaf1	BCL2-associated transcription factor 1	0.376718	4.14328	0.00274929	0.0156097
67921	Ube2f	ubiquitin-conjugating enzyme E2F (putative)	0.587734	4.14115	0.00275777	0.01565
74252	Armc1	armadillo repeat containing 1	0.451533	4.13406	0.00278625	0.015772
214855	Arid5a	AT rich interactive domain 5A (MRF1-like)	0.203737	4.13204	0.00279438	0.0158101
18027	Nfia	nuclear factor I/A	0.322041	4.12133	0.00283813	0.0159936
104662	Tsr1	TSR1 20S rRNA accumulation	0.493074	4.12048	0.00284164	0.0160054
13406	Dmp1	dentin matrix protein 1	0.0612301	4.11936	0.00284623	0.0160233
106248	Qtrt2	queuine tRNA-ribosyltransferase accessory subunit 2	0.383231	4.11103	0.00288084	0.016186
19027	Sypl	synaptophysin-like protein	0.428869	4.1094	0.0028877	0.0162003
26443	Psma6	proteasome (prosome, macropain) subunit, alpha type 6	0.6816	4.10774	0.00289465	0.0162313
209212	Osgin2	oxidative stress induced growth inhibitor family member 2	0.443635	4.10281	0.00291547	0.0163157
67414	Mfn1	mitofusin 1	0.468368	4.0777	0.00302392	0.0167897
112407	Egln3	egl-9 family hypoxia-inducible factor 3	0.793078	4.069	0.00306253	0.0169707
19416	Rasd1	RAS, dexamethasone-induced 1	1.19821	4.06769	0.00306838	0.0169865
13008	Csrp2	cysteine and glycine-rich protein 2	0.632451	4.06058	0.00310034	0.0171215
11304	Abca4	ATP-binding cassette, sub-family A (ABC1), member 4	0.0734823	4.05005	0.0031484	0.0173192
11908	Atf1	activating transcription factor 1	0.376889	4.04777	0.00315887	0.0173356
26942	Spag1	sperm associated antigen 1	0.179627	4.04608	0.00316667	0.0173607
71777	Ing3	inhibitor of growth family, member 3	0.485346	4.04093	0.00319064	0.0174565
72692	Hnrnpll	heterogeneous nuclear ribonucleoprotein L-like	0.4998	4.04033	0.00319341	0.0174565
20238	Atxn1	ataxin 1	0.631742	4.03574	0.00321492	0.0175422
23996	Psmc4	proteasome (prosome, macropain) 26S subunit, ATPase, 4	0.540183	4.03109	0.00323688	0.0176291
11535	Adm	adrenomedullin	0.566452	4.02812	0.00325098	0.0176942
98238	Lrrc59	leucine rich repeat containing 59	0.54865	4.02532	0.00326433	0.0177583
218210	Nup153	nucleoporin 153	0.418635	4.01874	0.00329591	0.01787
109019	Nabp1	nucleic acid binding protein 1	0.842702	4.00943	0.0033412	0.0180636
30046	Zfp292	zinc finger protein 292	0.30332	4.00106	0.0033825	0.0182189
13726	Emd	emerin	0.447467	3.99761	0.00339969	0.0182923
22764	Zfx	zinc finger protein X-linked	0.338882	3.99525	0.00341146	0.0183414
68652	Tab2	TGF-beta activated kinase 1/MAP3K7 binding protein 2	0.384643	3.99242	0.00342567	0.018391
228576	Mall	mal, T cell differentiation protein-like	0.411757	3.99112	0.0034322	0.0184147
67118	Bfar	bifunctional apoptosis regulator	0.48849	3.98963	0.00343973	0.0184376
215303	Camk1g	calcium/calmodulin-dependent protein kinase I gamma	0.0783999	3.9839	0.00346883	0.018576
58248	1700123O20Rik	RIKEN cDNA 1700123O20 gene	0.659168	3.98325	0.00347216	0.0185762
353172	Gars	glycyl-tRNA synthetase	0.521427	3.98081	0.0034846	0.0186162
28075	Desi1	desumoylating isopeptidase 1	0.618911	3.97777	0.00350023	0.0186558
107035	Fbxo38	F-box protein 38	0.437739	3.9716	0.00353214	0.0187993
232146	Eva1a	eva-1 homolog A (C. elegans)	0.329303	3.96887	0.00354638	0.0188396
56442	Serinc1	serine incorporator 1	0.509127	3.96623	0.0035602	0.0188864
19024	Ppfibp2	PTPRF interacting protein, binding protein 2 (liprin beta 2)	0.290387	3.95964	0.00359488	0.0190525
20402	Zfp106	zinc finger protein 106	0.575523	3.94813	0.00365641	0.0193286
16337	Insr	insulin receptor	0.476672	3.94774	0.00365851	0.0193286
12301	Cacybp	calcyclin binding protein	0.482948	3.94145	0.00369264	0.0194431
19243	Ptp4a1	protein tyrosine phosphatase 4a1	1.2229	3.93756	0.0037139	0.0195277
13479	Dpep1	dipeptidase 1	0.536256	3.93464	0.00372996	0.0195716
20339	Sele	selectin, endothelial cell	0.127587	3.93447	0.0037309	0.0195716
21927	Tnfaip1	tumor necrosis factor, alpha-induced protein 1 (endothelial)	0.453513	3.93137	0.003748	0.019625
12227	Btg2	B cell translocation gene 2, anti-proliferative	0.687195	3.93018	0.0037546	0.0196413
74838	Naa15	N(alpha)-acetyltransferase 15, NatA auxiliary subunit	0.334833	3.92714	0.00377153	0.0196934
56205	Ensa	endosulfine alpha	0.34074	3.92514	0.00378267	0.0197425
224088	Atp13a3	ATPase type 13A3	0.447652	3.92438	0.00378695	0.0197557
382423	Atxn7l3b	ataxin 7-like 3B	0.457329	3.92359	0.00379136	0.0197696
230596	Prpf38a	PRP38 pre-mRNA processing factor 38 (yeast) domain containing A	0.302293	3.92277	0.00379592	0.0197828
20520	Slc22a5	solute carrier family 22 (organic cation transporter), member 5	0.51301	3.92251	0.00379739	0.0197828
215351	Senp6	SUMO/sentrin specific peptidase 6	0.292131	3.91483	0.00384081	0.0199631
26398	Map2k4	mitogen-activated protein kinase kinase 4	0.369665	3.91418	0.00384446	0.0199728
211978	Zfyve26	zinc finger, FYVE domain containing 26	0.426792	3.91291	0.00385171	0.0199942
64930	Tsc1	TSC complex subunit 1	0.483389	3.91075	0.00386402	0.0200227
72795	Ttc19	tetratricopeptide repeat domain 19	0.418905	3.90838	0.00387761	0.0200346
69863	Ttc39b	tetratricopeptide repeat domain 39B	0.393606	3.90172	0.00391605	0.0202148
264064	Cdk8	cyclin-dependent kinase 8	0.265116	3.89586	0.00395025	0.0203712
140629	Ubox5	U box domain containing 5	0.32	3.8956	0.00395176	0.0203712
26430	Parg	poly (ADP-ribose) glycohydrolase	0.481772	3.89209	0.00397235	0.0204308
77128	Crebrf	CREB3 regulatory factor	0.566702	3.88967	0.00398666	0.0204765
11966	Atp6v1b2	ATPase, H+ transporting, lysosomal V1 subunit B2	0.501261	3.88752	0.0039994	0.0205325
52717	Anapc16	anaphase promoting complex subunit 16	0.483619	3.88333	0.00402433	0.0206324
109006	Ciapin1	cytokine induced apoptosis inhibitor 1	0.45492	3.87223	0.00409121	0.0209184
12454	Ccnk	cyclin K	0.455532	3.87157	0.00409521	0.02092
213753	Zfp598	zinc finger protein 598	0.586446	3.87117	0.00409765	0.020923
99031	Osbpl6	oxysterol binding protein-like 6	0.26554	3.86639	0.00412683	0.021034
69962	Mettl18	methyltransferase like 18	0.468155	3.84418	0.00426548	0.0216071
240832	Tor1aip2	torsin A interacting protein 2	0.504878	3.83704	0.00431113	0.0217927
54198	Snx3	sorting nexin 3	0.304348	3.83686	0.00431229	0.0217927
54403	Slc4a4	solute carrier family 4 (anion exchanger), member 4	0.711424	3.83457	0.00432703	0.021857
106957	Slc39a6	solute carrier family 39 (metal ion transporter), member 6	0.237688	3.83428	0.00432888	0.021857
109254	Adtrp	androgen dependent TFPI regulating protein	0.671383	3.83311	0.00433646	0.0218817
53376	Usp2	ubiquitin specific peptidase 2	0.567093	3.83164	0.00434596	0.0218944
75909	Vmp1	vacuole membrane protein 1	0.595547	3.83018	0.00435539	0.0219223
224014	Fgd4	FYVE, RhoGEF and PH domain containing 4	0.485963	3.82881	0.00436433	0.0219439
26397	Map2k3	mitogen-activated protein kinase kinase 3	0.492647	3.82714	0.00437518	0.0219828
76453	Prss23	protease, serine 23	0.654442	3.8247	0.00439115	0.0220434
13543	Dvl2	dishevelled segment polarity protein 2	0.308359	3.82357	0.00439858	0.0220612
76088	Dock8	dedicator of cytokinesis 8	0.64213	3.82018	0.00442088	0.0221534
22694	Zfp35	zinc finger protein 35	0.317414	3.81397	0.00446208	0.0223302
17764	Mtf1	metal response element binding transcription factor 1	0.21969	3.81096	0.00448215	0.0224207
20843	Stag2	stromal antigen 2	0.274054	3.80399	0.00452912	0.0226356
12465	Cct5	chaperonin containing Tcp1, subunit 5 (epsilon)	0.474849	3.79932	0.00456081	0.0227493
16450	Jag2	jagged 2	0.47279	3.79534	0.00458807	0.0228595
230737	Gnl2	guanine nucleotide binding protein-like 2 (nucleolar)	0.661597	3.79348	0.00460084	0.022913
22343	Lin7c	lin-7 homolog C (C. elegans)	0.361814	3.79254	0.00460729	0.0229351
544752	Tug1	taurine upregulated gene 1	0.4991	3.78979	0.0046263	0.0230196
71795	Pitpnc1	phosphatidylinositol transfer protein, cytoplasmic 1	0.510413	3.78895	0.00463212	0.0230384
66011	Ranbp17	RAN binding protein 17	0.0555295	3.78575	0.00465437	0.0231287
140780	Bmp2k	BMP2 inducible kinase	0.283133	3.78391	0.00466726	0.0231724
26943	Serinc3	serine incorporator 3	0.403773	3.77805	0.00470836	0.023343
52521	Zfp622	zinc finger protein 622	0.551961	3.77784	0.00470989	0.023343
16151	Ikbkg	inhibitor of kappaB kinase gamma	0.469971	3.77378	0.00473862	0.0234546
22337	Vdr	vitamin D (1,25-dihydroxyvitamin D3) receptor	0.253238	3.77313	0.00474324	0.0234672
67109	Zfp787	zinc finger protein 787	0.880503	3.77053	0.00476172	0.023538
56812	Dnajb2	DnaJ heat shock protein family (Hsp40) member B2	0.489087	3.76876	0.00477443	0.0235803
269682	Golga3	golgi autoantigen, golgin subfamily a, 3	0.267753	3.76558	0.0047972	0.0236617
81898	Sf3b1	splicing factor 3b, subunit 1	0.476631	3.76015	0.00483645	0.0238043
69228	Zfp746	zinc finger protein 746	0.265132	3.75984	0.00483874	0.0238043
17155	Man1a	mannosidase 1, alpha	0.40962	3.75416	0.00488012	0.0239715
17203	Mc5r	melanocortin 5 receptor	0.394065	3.7522	0.00489453	0.0240057
80291	Rilpl2	Rab interacting lysosomal protein-like 2	0.684318	3.74847	0.00492203	0.0241301
107271	Yars	tyrosyl-tRNA synthetase	0.493597	3.74675	0.00493475	0.0241715
70285	Rpf1	ribosome production factor 1 homolog	0.407223	3.7444	0.00495221	0.0242465
108857	Ankhd1	ankyrin repeat and KH domain containing 1	0.452956	3.74333	0.00496019	0.0242709
12396	Cbfa2t2	CBFA2/RUNX1 translocation partner 2	0.277176	3.73701	0.00500758	0.024441
20841	Zfp143	zinc finger protein 143	0.349196	3.72896	0.00506853	0.0246985
72289	Malat1	metastasis associated lung adenocarcinoma transcript 1 (non-coding RNA)	0.314033	3.72556	0.00509461	0.0247868
69524	Esam	endothelial cell-specific adhesion molecule	0.725881	3.72545	0.00509542	0.0247868
213673	9530068E07Rik	RIKEN cDNA 9530068E07 gene	0.425406	3.72383	0.00510786	0.0248125
225339	Ammecr1l	AMME chromosomal region gene 1-like	0.508998	3.72362	0.00510949	0.0248125
12750	Clk4	CDC like kinase 4	0.575368	3.722	0.00512196	0.0248517
71908	Cldn23	claudin 23	0.1375	3.71444	0.00518058	0.0250823
69116	Ubr4	ubiquitin protein ligase E3 component n-recognin 4	0.525855	3.71192	0.00520034	0.0251469
70769	Nolc1	nucleolar and coiled-body phosphoprotein 1	0.304219	3.71167	0.00520225	0.0251469
74569	Ttc17	tetratricopeptide repeat domain 17	0.287461	3.7116	0.00520281	0.0251469
19060	Ppp5c	protein phosphatase 5, catalytic subunit	0.480571	3.70952	0.00521919	0.0252045
53881	Slc5a3	solute carrier family 5 (inositol transporters), member 3	0.445031	3.70912	0.00522231	0.0252088
117198	Ivns1abp	influenza virus NS1A binding protein	0.499409	3.70728	0.00523683	0.0252466
210998	Fam91a1	family with sequence similarity 91, member A1	0.321016	3.70574	0.00524897	0.0252878
381022	Kmt2d	lysine (K)-specific methyltransferase 2D	0.169331	3.70309	0.00527002	0.0253634
21767	Tex264	testis expressed gene 264	0.506299	3.70164	0.00528152	0.025392
74180	Muc5b	mucin 5, subtype B, tracheobronchial	0.0360936	3.69661	0.00532181	0.0255366
72465	Zfp131	zinc finger protein 131	0.535549	3.69474	0.00533683	0.0255653
192160	Casc3	cancer susceptibility candidate 3	0.160241	3.69369	0.00534527	0.0255949
11832	Aqp7	aquaporin 7	0.347098	3.69168	0.00536155	0.0256568
118451	Mrps2	mitochondrial ribosomal protein S2	0.373027	3.68379	0.00542586	0.025904
76846	Rps9	ribosomal protein S9	0.403951	3.677	0.0054818	0.0261269
59025	Usp14	ubiquitin specific peptidase 14	0.34627	3.67594	0.00549058	0.0261578
83410	Cstf2t	cleavage stimulation factor, 3' pre-RNA subunit 2, tau	0.545238	3.6751	0.00549759	0.0261691
69608	Sec24d	Sec24 related gene family, member D (S. cerevisiae)	0.420441	3.67011	0.00553919	0.0263339
22364	Vpreb3	pre-B lymphocyte gene 3	0.378343	3.66672	0.00556766	0.026447
75734	Mff	mitochondrial fission factor	0.457553	3.66584	0.0055751	0.0264601
74022	Glyr1	glyoxylate reductase 1 homolog (Arabidopsis)	0.479938	3.66	0.00562459	0.0266502
17261	Mef2d	myocyte enhancer factor 2D	0.412795	3.65651	0.00565443	0.0267692
20361	Sema7a	sema domain, immunoglobulin domain (Ig), and GPI membrane anchor, (semaphorin) 7A	0.451242	3.64824	0.0057257	0.0270274
63959	Slc29a1	solute carrier family 29 (nucleoside transporters), member 1	0.805843	3.64272	0.00577384	0.0272092
54427	Dnmt3l	DNA (cytosine-5-)-methyltransferase 3-like	0.258105	3.64083	0.00579034	0.0272473
56375	B4galt4	UDP-Gal:betaGlcNAc beta 1,4-galactosyltransferase, polypeptide 4	0.424592	3.64069	0.00579157	0.0272473
20308	Ccl9	chemokine (C-C motif) ligand 9	1.20901	3.63767	0.00581816	0.027327
96957	Tmem62	transmembrane protein 62	0.6613	3.63437	0.00584742	0.0274075
269061	Cpsf7	cleavage and polyadenylation specific factor 7	0.386935	3.63006	0.00588575	0.0275415
19248	Ptpn12	protein tyrosine phosphatase, non-receptor type 12	0.406162	3.63006	0.00588575	0.0275415
192170	Eif4a3	eukaryotic translation initiation factor 4A3	0.328186	3.62843	0.00590038	0.0275986
216344	Rab21	RAB21, member RAS oncogene family	0.36819	3.61518	0.00602029	0.028056
56360	Acot9	acyl-CoA thioesterase 9	0.309403	3.60816	0.00608484	0.0282864
51786	Cpsf2	cleavage and polyadenylation specific factor 2	0.426353	3.60491	0.006115	0.0284027
216549	Aftph	aftiphilin	0.409792	3.60086	0.00615287	0.0285201
56349	Net1	neuroepithelial cell transforming gene 1	0.633238	3.59364	0.00622079	0.0287759
27399	Ip6k1	inositol hexaphosphate kinase 1	0.521361	3.59281	0.00622869	0.0287808
216760	Mfap3	microfibrillar-associated protein 3	0.317245	3.5927	0.00622968	0.0287808
57750	Wdr12	WD repeat domain 12	0.319459	3.58858	0.00626897	0.0288924
73658	Spns1	spinster homolog 1	0.408933	3.57806	0.00637021	0.0292636
23984	Pde10a	phosphodiesterase 10A	0.225827	3.56771	0.00647162	0.0296212
22190	Ubc	ubiquitin C	0.947503	3.56528	0.00649569	0.0296953
80914	Uck2	uridine-cytidine kinase 2	0.530221	3.56289	0.00651935	0.0297915
67846	Tmem39a	transmembrane protein 39a	0.389968	3.56094	0.00653879	0.0298562
28250	Slco1a4	solute carrier organic anion transporter family, member 1a4	0.108507	3.55766	0.00657164	0.029994
108707	Fam207a	family with sequence similarity 207, member A	0.417451	3.55089	0.00663995	0.0302326
72354	Ttc4	tetratricopeptide repeat domain 4	0.336161	3.54392	0.00671103	0.0304956
55990	Fmo2	flavin containing monooxygenase 2	0.569771	3.54391	0.00671119	0.0304956
26432	Plod2	procollagen lysine, 2-oxoglutarate 5-dioxygenase 2	0.511664	3.54267	0.00672387	0.0305313
19069	Nup88	nucleoporin 88	0.390063	3.54035	0.00674781	0.0305882
13007	Csrp1	cysteine and glycine-rich protein 1	0.492712	3.53448	0.00680868	0.0308025
242646	Tctex1d4	Tctex1 domain containing 4	0.280199	3.53411	0.00681249	0.0308074
16558	Kif16b	kinesin family member 16B	0.446362	3.53329	0.00682101	0.0308336
26371	Ciao1	cytosolic iron-sulfur protein assembly 1	0.495748	3.53265	0.00682776	0.0308517
21743	Inmt	indolethylamine N-methyltransferase	1.00586	3.53168	0.00683785	0.030885
112405	Egln1	egl-9 family hypoxia-inducible factor 1	0.428546	3.53125	0.00684241	0.0308933
13039	Ctsl	cathepsin L	0.516151	3.53002	0.00685525	0.0309122
57259	Tob2	transducer of ERBB2, 2	0.656503	3.52927	0.00686318	0.0309122
11964	Atp6v1a	ATPase, H+ transporting, lysosomal V1 subunit A	0.498123	3.52902	0.00686573	0.0309122
20491	Sla	src-like adaptor	0.229167	3.52424	0.0069162	0.031127
217203	Tmem106a	transmembrane protein 106A	0.53184	3.52125	0.00694796	0.031233
12675	Chuk	conserved helix-loop-helix ubiquitous kinase	0.465744	3.52031	0.00695796	0.0312652
81703	Jdp2	Jun dimerization protein 2	0.376702	3.51296	0.00703677	0.0315191
19744	Rheb	Ras homolog enriched in brain	0.413453	3.50985	0.00707036	0.031632
110532	Adarb1	adenosine deaminase, RNA-specific, B1	0.3522	3.50478	0.00712555	0.031816
216965	Taok1	TAO kinase 1	0.444747	3.5042	0.00713196	0.0318321
101943	Sf3b3	splicing factor 3b, subunit 3	0.434613	3.50258	0.00714967	0.0318859
229096	Ythdf3	YTH N6-methyladenosine RNA binding protein 3	0.252908	3.49453	0.0072385	0.0321672
226442	Zfp281	zinc finger protein 281	0.372149	3.49429	0.00724118	0.0321672
18793	Plaur	plasminogen activator, urokinase receptor	0.616514	3.48632	0.00733035	0.0324723
170483	Grin3b	glutamate receptor, ionotropic, NMDA3B	0.17898	3.48603	0.00733362	0.0324723
27428	Shroom3	shroom family member 3	0.102235	3.48557	0.0073388	0.0324723
15357	Hmgcr	3-hydroxy-3-methylglutaryl-Coenzyme A reductase	0.445954	3.48533	0.00734144	0.0324723
12223	Btc	betacellulin, epidermal growth factor family member	0.765162	3.47973	0.00740488	0.032689
70248	Dazap1	DAZ associated protein 1	0.491209	3.4791	0.00741205	0.0327079
270066	Slc35e1	solute carrier family 35, member E1	0.465634	3.47818	0.0074226	0.0327289
26572	Cops3	COP9 signalosome subunit 3	0.33854	3.47717	0.00743411	0.0327669
70652	Tmem144	transmembrane protein 144	0.210204	3.46862	0.0075325	0.0331231
269593	Luzp1	leucine zipper protein 1	0.347343	3.46688	0.00755267	0.0331533
109711	Actn1	actinin, alpha 1	0.362156	3.46263	0.00760226	0.033352
228994	Ythdf1	YTH N6-methyladenosine RNA binding protein 1	0.415008	3.46126	0.00761827	0.0333927
70611	Fbxo33	F-box protein 33	0.376322	3.45822	0.00765398	0.0335269
74133	Smg8	smg-8 homolog, nonsense mediated mRNA decay factor (C. elegans)	0.482388	3.4575	0.00766244	0.033538
27215	Azi2	5-azacytidine induced gene 2	0.326097	3.45589	0.00768146	0.0336082
170936	Zfp369	zinc finger protein 369	0.398573	3.45228	0.00772437	0.0337239
50527	Ero1l	ERO1-like (S. cerevisiae)	0.259212	3.45182	0.00772975	0.0337239
108124	Napa	N-ethylmaleimide sensitive fusion protein attachment protein alpha	0.489695	3.44585	0.00780125	0.0339246
14390	Gabpa	GA repeat binding protein, alpha	0.538146	3.4458	0.00780175	0.0339246
22599	Slc6a20b	solute carrier family 6 (neurotransmitter transporter), member 20B	0.188278	3.44416	0.00782158	0.0339846
18742	Pitx3	paired-like homeodomain transcription factor 3	0.449696	3.43525	0.00792967	0.0343619
12995	Csnk2a1	casein kinase 2, alpha 1 polypeptide	0.375734	3.43157	0.00797481	0.0345311
20597	Smpd1	sphingomyelin phosphodiesterase 1, acid lysosomal	0.50616	3.42989	0.00799554	0.0345829
13205	Ddx3x	DEAD/H (Asp-Glu-Ala-Asp/His) box polypeptide 3, X-linked	0.595093	3.42985	0.00799597	0.0345829
67207	Lsm1	LSM1 homolog, mRNA degradation associated	0.363646	3.42237	0.00808879	0.0348246
76793	Snip1	Smad nuclear interacting protein 1	0.472599	3.41746	0.00815044	0.0350234
68966	Ngdn	neuroguidin, EIF4E binding protein	0.534067	3.41493	0.00818229	0.0351469
18452	P4ha2	procollagen-proline, 2-oxoglutarate 4-dioxygenase (proline 4-hydroxylase), alpha II polypeptide	0.395424	3.41343	0.00820127	0.0351889
15894	Icam1	intercellular adhesion molecule 1	0.463067	3.41318	0.00820451	0.0351889
70470	Rprd1b	regulation of nuclear pre-mRNA domain containing 1B	0.350883	3.41288	0.00820819	0.0351913
15526	Hspa9	heat shock protein 9	0.40708	3.41087	0.00823384	0.0352611
110960	Tars	threonyl-tRNA synthetase	0.507341	3.40973	0.00824834	0.035291
13119	Cyp4a14	cytochrome P450, family 4, subfamily a, polypeptide 14	0.191071	3.40942	0.00825223	0.035291
217864	Rcor1	REST corepressor 1	0.364261	3.40934	0.00825329	0.035291
56709	Dnajb12	DnaJ heat shock protein family (Hsp40) member B12	0.364667	3.4074	0.00827807	0.0353702
67292	Pigc	phosphatidylinositol glycan anchor biosynthesis, class C	0.226685	3.40678	0.00828595	0.0353905
16598	Klf2	Kruppel-like factor 2 (lung)	0.576508	3.40521	0.00830614	0.03545
106894	Hmgxb3	HMG box domain containing 3	0.37641	3.40246	0.0083415	0.0355535
107022	Gramd3	GRAM domain containing 3	0.570533	3.40195	0.00834811	0.0355535
24015	Abce1	ATP-binding cassette, sub-family E (OABP), member 1	0.451932	3.40135	0.00835588	0.0355601
52036	Ppp6r3	protein phosphatase 6, regulatory subunit 3	0.401061	3.40019	0.00837083	0.0355918
74158	Josd1	Josephin domain containing 1	0.548974	3.39729	0.00840842	0.0357382
68350	Mul1	mitochondrial ubiquitin ligase activator of NFKB 1	0.442352	3.39698	0.00841243	0.0357417
76448	Ppp1r18	protein phosphatase 1, regulatory subunit 18	0.239953	3.39425	0.00844813	0.035853
79263	Trim39	tripartite motif-containing 39	0.270156	3.39235	0.00847297	0.0359315
12913	Creb3	cAMP responsive element binding protein 3	0.420298	3.38915	0.00851504	0.0360693
80859	Nfkbiz	nuclear factor of kappa light polypeptide gene enhancer in B cells inhibitor, zeta	0.268462	3.38822	0.00852722	0.0360939
56347	Eif3c	eukaryotic translation initiation factor 3, subunit C	0.353656	3.38641	0.00855115	0.0361681
67388	Rab5if	RAB5 interacting factor	0.400275	3.38575	0.00855995	0.0361782
67073	Pi4k2b	phosphatidylinositol 4-kinase type 2 beta	0.318269	3.38154	0.00861587	0.036393
664883	Nova1	neuro-oncological ventral antigen 1	0.23638	3.38106	0.00862229	0.036401
24001	Tiam2	T cell lymphoma invasion and metastasis 2	0.309631	3.37893	0.00865074	0.0365035
19346	Rab6a	RAB6A, member RAS oncogene family	0.251092	3.37044	0.0087653	0.0368865
58178	Sorcs1	sortilin-related VPS10 domain containing receptor 1	0.046655	3.37034	0.00876667	0.0368865
14766	Adgrg1	adhesion G protein-coupled receptor G1	0.654133	3.36931	0.00878067	0.036918
103583	Fbxw11	F-box and WD-40 domain protein 11	0.399516	3.36744	0.00880621	0.0369978
14715	Gnrhr	gonadotropin releasing hormone receptor	0.0403829	3.36713	0.00881038	0.0370016
67223	Rrp15	ribosomal RNA processing 15 homolog (S. cerevisiae)	0.462655	3.36651	0.00881884	0.0370234
216971	Fam222b	family with sequence similarity 222, member B	0.283072	3.36507	0.00883852	0.0370923
114741	Supt16	SPT16, facilitates chromatin remodeling subunit	0.294154	3.36156	0.00888676	0.0372256
18654	Pgf	placental growth factor	0.523448	3.35906	0.00892137	0.0373291
67731	Fbxo32	F-box protein 32	1.03622	3.35865	0.00892703	0.037339
72129	Pex13	peroxisomal biogenesis factor 13	0.550266	3.35726	0.00894625	0.037378
66665	Msantd3	Myb/SANT-like DNA-binding domain containing 3	0.639365	3.35651	0.00895671	0.0374078
16396	Itch	itchy, E3 ubiquitin protein ligase	0.425418	3.35412	0.00898987	0.0375324
218333	Ice1	interactor of little elongation complex ELL subunit 1	0.342986	3.35169	0.0090239	0.0376467
16190	Il4ra	interleukin 4 receptor, alpha	0.4914	3.34658	0.00909578	0.0378907
100503659	Cbarp	calcium channel, voltage-dependent, beta subunit associated regulatory protein	0.154464	3.34599	0.0091041	0.0379114
15571	Elavl3	ELAV like RNA binding protein 3	0.153139	3.34384	0.00913455	0.0379828
17463	Psmd7	proteasome (prosome, macropain) 26S subunit, non-ATPase, 7	0.395241	3.34376	0.00913567	0.0379828
16201	Ilf3	interleukin enhancer binding factor 3	0.346371	3.34198	0.00916095	0.0380176
67458	Ergic1	endoplasmic reticulum-golgi intermediate compartment (ERGIC) 1	0.614608	3.34072	0.00917887	0.0380686
64934	Pes1	pescadillo ribosomal biogenesis factor 1	0.488276	3.33812	0.00921597	0.0382084
320720	Fastkd1	FAST kinase domains 1	0.421759	3.33779	0.00922074	0.0382142
99890	Prmt6	protein arginine N-methyltransferase 6	0.296518	3.33721	0.00922898	0.0382343
72388	Ripk4	receptor-interacting serine-threonine kinase 4	0.487238	3.3359	0.0092478	0.0382703
14420	Galc	galactosylceramidase	0.378327	3.33115	0.00931636	0.0385117
67630	Samd8	sterile alpha motif domain containing 8	0.418955	3.33081	0.00932132	0.0385181
30952	Cngb3	cyclic nucleotide gated channel beta 3	0.0356997	3.33016	0.00933076	0.0385418
15288	Hmbs	hydroxymethylbilane synthase	0.410414	3.32767	0.00936685	0.0386357
12630	Cfi	complement component factor i	0.293035	3.32634	0.00938624	0.0387015
68441	Rraga	Ras-related GTP binding A	0.351371	3.32074	0.00946839	0.0389834
230648	Efcab14	EF-hand calcium binding domain 14	0.222561	3.31709	0.00952222	0.039148
68051	Nutf2	nuclear transport factor 2	0.388815	3.31562	0.00954408	0.0392237
68077	Nop53	NOP53 ribosome biogenesis factor	0.415233	3.30744	0.00966638	0.0396111
114143	Atp6v0b	ATPase, H+ transporting, lysosomal V0 subunit B	0.478489	3.30587	0.00968994	0.0396933
217980	Larp4b	La ribonucleoprotein domain family, member 4B	0.457977	3.30433	0.00971328	0.0397485
11840	Arf1	ADP-ribosylation factor 1	0.397096	3.30428	0.00971396	0.0397485
19291	Purb	purine rich element binding protein B	0.440555	3.30273	0.00973753	0.0398253
67477	Abhd15	abhydrolase domain containing 15	0.415226	3.30258	0.00973977	0.0398253
12283	Cab39	calcium binding protein 39	0.428041	3.28889	0.00994976	0.0405082
66229	Rpl7l1	ribosomal protein L7-like 1	0.486361	3.2871	0.00997744	0.0405835
67268	Myl12a	myosin, light chain 12A, regulatory, non-sarcomeric	0.421713	3.28601	0.00999449	0.0406026
13026	Pcyt1a	phosphate cytidylyltransferase 1, choline, alpha isoform	0.426252	3.28264	0.0100471	0.0407725
50817	Capn15	calpain 15	0.339776	3.27711	0.0101341	0.0410078
11514	Adcy8	adenylate cyclase 8	0.045085	3.27651	0.0101437	0.0410319
67917	Zcchc3	zinc finger, CCHC domain containing 3	0.366872	3.27626	0.0101476	0.0410328
217684	Susd6	sushi domain containing 6	0.413367	3.27457	0.0101744	0.0411121
23879	Fxr2	fragile X mental retardation, autosomal homolog 2	0.547255	3.27191	0.0102168	0.0412242
192157	Socs7	suppressor of cytokine signaling 7	0.32476	3.26757	0.0102861	0.0414154
60321	Wbp11	WW domain binding protein 11	0.434775	3.2671	0.0102937	0.0414313
66136	Znrd1	zinc ribbon domain containing 1	0.2839	3.26601	0.0103112	0.0414869
51886	Fubp1	far upstream element (FUSE) binding protein 1	0.306421	3.26276	0.0103637	0.0416436
16194	Il6ra	interleukin 6 receptor, alpha	0.431587	3.25972	0.010413	0.0418219
18133	Ccn3	cellular communication network factor 3	0.296549	3.25746	0.0104498	0.0419075
69993	Chn2	chimerin 2	0.116223	3.25728	0.0104528	0.0419075
19716	Bex1	brain expressed X-linked 1	0.131082	3.25454	0.0104976	0.0420426
22436	Xdh	xanthine dehydrogenase	0.522915	3.25373	0.0105109	0.0420658
56095	Ftsj3	FtsJ RNA methyltransferase homolog 3 (E. coli)	0.562947	3.2532	0.0105197	0.0420728
57080	Gtf2ird1	general transcription factor II I repeat domain-containing 1	0.576666	3.25272	0.0105275	0.0420728
13202	Ddt	D-dopachrome tautomerase	0.560713	3.25234	0.0105338	0.042083
227736	Cfap157	cilia and flagella associated protein 157	0.219646	3.24741	0.0106153	0.0423683
67300	Cltc	clathrin, heavy polypeptide (Hc)	0.378178	3.24642	0.0106317	0.0424144
22228	Ucp2	uncoupling protein 2 (mitochondrial, proton carrier)	0.331749	3.23928	0.0107511	0.0427467
12751	Tpp1	tripeptidyl peptidase I	0.271607	3.23831	0.0107673	0.0427893
19092	Prkg2	protein kinase, cGMP-dependent, type II	0.143385	3.23499	0.0108234	0.0429671
224902	Safb2	scaffold attachment factor B2	0.349537	3.23428	0.0108355	0.0429996
73656	Ms4a6c	membrane-spanning 4-domains, subfamily A, member 6C	0.609507	3.23053	0.0108992	0.0431891
16400	Itga3	integrin alpha 3	0.199977	3.22993	0.0109095	0.0431912
22709	Zfp51	zinc finger protein 51	0.34871	3.22968	0.0109137	0.0431912
56543	Kcnd3	potassium voltage-gated channel, Shal-related family, member 3	0.111293	3.22327	0.0110237	0.0435177
56228	Ube2j1	ubiquitin-conjugating enzyme E2J 1	0.298977	3.22035	0.0110742	0.0436866
72580	Zup1	zinc finger containing ubiquitin peptidase 1	0.369607	3.21791	0.0111167	0.0437591
104721	Ddx1	DEAD (Asp-Glu-Ala-Asp) box polypeptide 1	0.356555	3.21669	0.0111379	0.0438004
30940	Usp25	ubiquitin specific peptidase 25	0.34201	3.2147	0.0111728	0.0438839
73647	Capn9	calpain 9	0.23194	3.21459	0.0111747	0.0438839
101612	Grwd1	glutamate-rich WD repeat containing 1	0.337497	3.21231	0.0112147	0.0440103
20437	Siah1a	siah E3 ubiquitin protein ligase 1A	0.640354	3.20953	0.0112637	0.0441568
100470	Lao1	L-amino acid oxidase 1	0.0840343	3.20613	0.0113239	0.0443535
19134	Prpf4b	pre-mRNA processing factor 4B	0.373318	3.20582	0.0113294	0.0443535
53623	Gria3	glutamate receptor, ionotropic, AMPA3 (alpha 3)	0.0322471	3.2058	0.0113296	0.0443535
382073	Ccdc84	coiled-coil domain containing 84	0.374227	3.20368	0.0113673	0.0444704
67532	Mfap1a	microfibrillar-associated protein 1A	0.492804	3.20273	0.0113844	0.0445219
225160	Thoc1	THO complex 1	0.303983	3.19749	0.0114781	0.0448266
29876	Clic4	chloride intracellular channel 4 (mitochondrial)	0.388412	3.19635	0.0114988	0.0448916
56030	Tmem131	transmembrane protein 131	0.354233	3.19464	0.0115296	0.0449655
97112	Nmd3	NMD3 ribosome export adaptor	0.55456	3.18741	0.0116612	0.0453222
269536	Tex10	testis expressed gene 10	0.20089	3.18555	0.0116952	0.0454098
66143	Eef1e1	eukaryotic translation elongation factor 1 epsilon 1	0.608935	3.18196	0.0117614	0.0456489
665775	Bod1l	biorientation of chromosomes in cell division 1-like	0.278882	3.18061	0.0117863	0.0457302
14281	Fos	FBJ osteosarcoma oncogene	0.470071	3.17519	0.0118871	0.0460479
12028	Bax	BCL2-associated X protein	0.612161	3.17511	0.0118886	0.0460479
59030	Mkks	McKusick-Kaufman syndrome	0.444918	3.17428	0.0119041	0.0460921
57815	Spata5	spermatogenesis associated 5	0.267082	3.17351	0.0119185	0.0461313
109637	Upk1a	uroplakin 1A	0.297441	3.17316	0.011925	0.0461313
26372	Clcn6	chloride channel, voltage-sensitive 6	0.302455	3.17149	0.0119563	0.0461838
223739	5031439G07Rik	RIKEN cDNA 5031439G07 gene	0.333941	3.16973	0.0119894	0.0462485
234344	Naf1	nuclear assembly factor 1 ribonucleoprotein	0.256332	3.16949	0.0119939	0.0462501
75007	Mindy1	MINDY lysine 48 deubiquitinase 1	0.275855	3.16613	0.0120574	0.0463842
319817	Rc3h2	ring finger and CCCH-type zinc finger domains 2	0.393173	3.16414	0.0120953	0.0464981
13716	Ell	elongation factor RNA polymerase II	0.454421	3.16352	0.012107	0.0465236
235040	Atg4d	autophagy related 4D, cysteine peptidase	0.532633	3.16336	0.0121101	0.0465236
58207	Slc43a3	solute carrier family 43, member 3	0.323139	3.15716	0.0122286	0.0469152
67655	Ctdp1	CTD (carboxy-terminal domain, RNA polymerase II, polypeptide A) phosphatase, subunit 1	0.232477	3.15686	0.0122345	0.0469167
231386	Ythdc1	YTH domain containing 1	0.282565	3.153	0.012309	0.0471276
19294	Nectin2	nectin cell adhesion molecule 2	0.496328	3.15238	0.0123209	0.0471573
66849	Ppp1r2	protein phosphatase 1, regulatory inhibitor subunit 2	0.435217	3.15047	0.012358	0.0472833
18132	Notch4	notch 4	0.392763	3.14667	0.012432	0.0475047
16646	Kpna1	karyopherin (importin) alpha 1	0.43432	3.14194	0.0125249	0.0478066
20224	Sar1a	secretion associated Ras related GTPase 1A	0.469409	3.14175	0.0125286	0.0478066
224903	Safb	scaffold attachment factor B	0.300086	3.13768	0.0126092	0.0480328
229534	Pbxip1	pre B cell leukemia transcription factor interacting protein 1	0.590099	3.13744	0.012614	0.0480351
98985	Clp1	CLP1, cleavage and polyadenylation factor I subunit	0.49956	3.13469	0.0126688	0.0482114
50780	Rgs3	regulator of G-protein signaling 3	0.452332	3.13231	0.0127163	0.0483596
52231	Ankzf1	ankyrin repeat and zinc finger domain containing 1	0.321611	3.13159	0.0127307	0.0483819
213541	Ythdf2	YTH N6-methyladenosine RNA binding protein 2	0.452484	3.13055	0.0127517	0.0484289
67753	Eqtn	equatorin, sperm acrosome associated	0.329172	3.12412	0.0128815	0.0488236
52504	Cenpo	centromere protein O	0.311392	3.12331	0.0128978	0.0488691
67554	Slc25a30	solute carrier family 25, member 30	0.424962	3.11178	0.0131343	0.0493846
14156	Fen1	flap structure specific endonuclease 1	0.0514365	3.11083	0.013154	0.0494179
53892	Ppm1d	protein phosphatase 1D magnesium-dependent, delta isoform	0.282519	3.10968	0.013178	0.0494504
68744	Zfp740	zinc finger protein 740	0.441951	3.10621	0.0132502	0.0496553
50490	Nox4	NADPH oxidase 4	0.249076	3.10341	0.013309	0.0497932
217194	Klhl11	kelch-like 11	0.557918	3.10073	0.0133654	0.0499215
218624	Il31ra	interleukin 31 receptor A	0.0512299	3.10027	0.0133751	0.0499413
27981	Rsrp1	arginine/serine rich protein 1	0.505559	3.0997	0.0133871	0.0499698
69085	Zcchc9	zinc finger, CCHC domain containing 9	0.418934	3.09914	0.0133988	0.049997
66413	Psmd6	proteasome (prosome, macropain) 26S subunit, non-ATPase, 6	0.496167	3.09435	0.0135006	0.0503104
72123	Ccdc71l	coiled-coil domain containing 71 like	0.426863	3.08913	0.0136122	0.0506594
74890	Morn3	MORN repeat containing 3	0.0684608	3.08785	0.0136398	0.0507289
27407	Abcf2	ATP-binding cassette, sub-family F (GCN20), member 2	0.354434	3.08692	0.0136598	0.0507863
20482	Skil	SKI-like	0.30217	3.08232	0.0137595	0.0510256
68039	Nmb	neuromedin B	0.586433	3.08202	0.0137658	0.0510256
108989	Tpr	translocated promoter region, nuclear basket protein	0.235921	3.08108	0.0137864	0.0510726
320717	Pptc7	PTC7 protein phosphatase homolog	0.512844	3.07323	0.0139584	0.051532
12330	Canx	calnexin	0.469428	3.07313	0.0139606	0.051532
171210	Acot2	acyl-CoA thioesterase 2	0.390996	3.07185	0.0139889	0.0515861
56089	Ramp3	receptor (calcitonin) activity modifying protein 3	0.286895	3.07093	0.0140092	0.0516439
231889	Bud31	BUD31 homolog	0.374792	3.07032	0.0140228	0.0516607
272382	Spib	Spi-B transcription factor (Spi-1/PU.1 related)	0.066255	3.07007	0.0140283	0.0516641
74320	Wdr33	WD repeat domain 33	0.302354	3.06768	0.0140814	0.0517922
22284	Usp9x	ubiquitin specific peptidase 9, X chromosome	0.254134	3.06247	0.0141978	0.0521186
215449	Rap1b	RAS related protein 1b	0.320185	3.05945	0.0142658	0.052334
235567	Dnajc13	DnaJ heat shock protein family (Hsp40) member C13	0.354678	3.05802	0.0142982	0.052385
59003	Maea	macrophage erythroblast attacher	0.408516	3.05609	0.0143418	0.0525279
13185	Vps26c	VPS26 endosomal protein sorting factor C	0.466681	3.05223	0.0144297	0.0528171
66249	Pno1	partner of NOB1 homolog	0.380519	3.05166	0.0144428	0.0528171
66878	Riok3	RIO kinase 3	0.460692	3.05164	0.0144433	0.0528171
80294	Pofut2	protein O-fucosyltransferase 2	0.368159	3.05158	0.0144446	0.0528171
226757	Wdr26	WD repeat domain 26	0.381281	3.05125	0.0144521	0.0528171
66642	Ctnnbl1	catenin, beta like 1	0.287916	3.04092	0.0146902	0.0535437
68833	Pdcl3	phosducin-like 3	0.40351	3.04069	0.0146957	0.0535466
74841	Usp38	ubiquitin specific peptidase 38	0.339862	3.04018	0.0147076	0.0535725
14853	Gspt2	G1 to S phase transition 2	0.17911	3.03978	0.0147169	0.0535891
68048	Aen	apoptosis enhancing nuclease	0.262931	3.0349	0.0148309	0.0539349
93687	Csnk1a1	casein kinase 1, alpha 1	0.370025	3.03091	0.014925	0.0542248
17179	Matk	megakaryocyte-associated tyrosine kinase	0.148016	3.0265	0.0150297	0.0545175
22687	Zpr1	ZPR1 zinc finger	0.431608	3.02523	0.0150598	0.0546094
53975	Ddx20	DEAD (Asp-Glu-Ala-Asp) box polypeptide 20	0.236488	3.01895	0.0152105	0.0550324
19384	Ran	RAN, member RAS oncogene family	0.404196	3.01868	0.0152171	0.0550374
68480	Card19	caspase recruitment domain family, member 19	0.652633	3.01301	0.0153545	0.0554644
72726	Tbcc	tubulin-specific chaperone C	0.538642	3.01235	0.0153705	0.0555046
108098	Med21	mediator complex subunit 21	0.240351	3.00998	0.0154284	0.0556602
26570	Slc7a11	solute carrier family 7 (cationic amino acid transporter, y+ system), member 11	0.168144	3.00939	0.0154428	0.0556945
54645	Gripap1	GRIP1 associated protein 1	0.211024	3.00837	0.0154678	0.0557492
67683	Pbdc1	polysaccharide biosynthesis domain containing 1	0.312696	3.00684	0.0155054	0.0558607
71472	Usp19	ubiquitin specific peptidase 19	0.435839	3.00616	0.0155221	0.0558914
56698	Phax	phosphorylated adaptor for RNA export	0.485146	3.00519	0.0155461	0.0559599
105439	Slain1	SLAIN motif family, member 1	0.0452442	3.0045	0.0155631	0.0560035
72590	Ppme1	protein phosphatase methylesterase 1	0.517482	3.00164	0.0156337	0.0562395
12775	Ccr7	chemokine (C-C motif) receptor 7	0.077183	2.99531	0.0157917	0.0567177
19011	Endou	endonuclease, polyU-specific	0.268319	2.99441	0.0158142	0.0567804
99712	Cept1	choline/ethanolaminephosphotransferase 1	0.409541	2.98657	0.0160121	0.0573637
19217	Ptger2	prostaglandin E receptor 2 (subtype EP2)	0.223042	2.98498	0.0160527	0.0574568
15239	Hgs	HGF-regulated tyrosine kinase substrate	0.351477	2.97958	0.016191	0.0577666
57751	Rnf25	ring finger protein 25	0.34528	2.97822	0.0162259	0.0578728
19663	Rbpms	RNA binding protein gene with multiple splicing	0.432457	2.97727	0.0162504	0.0579264
15490	Hsd17b7	hydroxysteroid (17-beta) dehydrogenase 7	0.496012	2.97714	0.0162538	0.0579264
56550	Ube2d2a	ubiquitin-conjugating enzyme E2D 2A	0.412141	2.97671	0.0162648	0.0579385
229700	Rbm15	RNA binding motif protein 15	0.325768	2.97364	0.0163444	0.0581544
217109	Utp18	UTP18 small subunit processome component	0.290371	2.97246	0.016375	0.0582211
22359	Vldlr	very low density lipoprotein receptor	0.576343	2.96497	0.0165711	0.0586969
52906	Ahi1	Abelson helper integration site 1	0.231476	2.96113	0.0166726	0.0589646
67845	Rnf115	ring finger protein 115	0.348893	2.95852	0.0167419	0.0591555
17130	Smad6	SMAD family member 6	0.385965	2.95673	0.0167895	0.0592295
140917	Dclre1b	DNA cross-link repair 1B	0.2516	2.95645	0.0167972	0.0592357
328110	Prpf39	pre-mRNA processing factor 39	0.321007	2.95383	0.0168672	0.0594476
76332	Cog2	component of oligomeric golgi complex 2	0.315792	2.95314	0.0168858	0.059493
237928	Phospho1	phosphatase, orphan 1	0.516616	2.95296	0.0168906	0.059493
192174	Rwdd4a	RWD domain containing 4A	0.33358	2.9523	0.0169084	0.0595188
11520	Plin2	perilipin 2	0.612301	2.9496	0.0169811	0.0597376
15257	Hipk1	homeodomain interacting protein kinase 1	0.377769	2.94425	0.0171261	0.0600796
18553	Pcsk6	proprotein convertase subtilisin/kexin type 6	0.625866	2.94129	0.017207	0.0603071
107065	Lrrtm2	leucine rich repeat transmembrane neuronal 2	0.405502	2.93675	0.0173319	0.0606696
216543	Cep68	centrosomal protein 68	0.331541	2.936	0.0173526	0.0607233
22289	Kdm6a	lysine (K)-specific demethylase 6A	0.202983	2.93573	0.01736	0.0607304
17131	Smad7	SMAD family member 7	0.233533	2.93545	0.0173678	0.060739
72630	Hspa12b	heat shock protein 12B	0.373279	2.93483	0.0173849	0.0607799
68421	Lmbrd1	LMBR1 domain containing 1	0.352106	2.93345	0.0174231	0.060876
76497	Ppp1r11	protein phosphatase 1, regulatory inhibitor subunit 11	0.426869	2.93149	0.0174776	0.0610285
66293	Snhg16	small nucleolar RNA host gene 16	0.183063	2.92268	0.0177246	0.0616816
22034	Traf6	TNF receptor-associated factor 6	0.258751	2.91425	0.0179642	0.0623199
217127	Kat7	K(lysine) acetyltransferase 7	0.361665	2.9124	0.018017	0.0624493
77031	Slc9a8	solute carrier family 9 (sodium/hydrogen exchanger), member 8	0.305307	2.90248	0.0183042	0.0632895
21923	Tnc	tenascin C	0.275068	2.8997	0.0183855	0.0634266
54723	Tfip11	tuftelin interacting protein 11	0.289124	2.89696	0.018466	0.0635512
17299	Mettl1	methyltransferase like 1	0.300809	2.89615	0.0184899	0.063582
170799	Rtkn2	rhotekin 2	0.0240616	2.89519	0.0185183	0.0636407
22631	Ywhaz	tyrosine 3-monooxygenase/tryptophan 5-monooxygenase activation protein, zeta polypeptide	0.581171	2.89387	0.0185573	0.0636781
19279	Ptprr	protein tyrosine phosphatase, receptor type, R	0.135576	2.89182	0.0186179	0.0638667
19339	Rab3a	RAB3A, member RAS oncogene family	0.52205	2.89044	0.018659	0.063969
102115	Dohh	deoxyhypusine hydroxylase/monooxygenase	0.422219	2.886	0.0187916	0.0642483
69156	Comtd1	catechol-O-methyltransferase domain containing 1	0.469454	2.88502	0.0188209	0.0643289
192970	Dhrs11	dehydrogenase/reductase (SDR family) member 11	0.689132	2.88192	0.0189143	0.0645857
29858	Pmm1	phosphomannomutase 1	0.458196	2.88192	0.0189143	0.0645857
51811	Clec4f	C-type lectin domain family 4, member f	0.0442041	2.87949	0.0189878	0.064743
75646	Rai14	retinoic acid induced 14	0.274231	2.87894	0.0190044	0.064753
109880	Braf	Braf transforming gene	0.234438	2.87775	0.0190405	0.0648247
71793	Ints12	integrator complex subunit 12	0.240554	2.8722	0.0192101	0.0653236
68927	Ptcd2	pentatricopeptide repeat domain 2	0.388394	2.87043	0.0192644	0.0654813
243846	Ccdc9	coiled-coil domain containing 9	0.160437	2.87031	0.0192681	0.0654813
71971	Zswim1	zinc finger SWIM-type containing 1	0.279175	2.86638	0.0193893	0.0658341
12215	Bsg	basigin	0.549647	2.86232	0.0195153	0.0661826
100177	Zmym6	zinc finger, MYM-type 6	0.251087	2.86145	0.0195427	0.0662354
228869	Ncoa5	nuclear receptor coactivator 5	0.292834	2.85897	0.01962	0.0664378
19124	Procr	protein C receptor, endothelial	0.442217	2.85348	0.019793	0.0668436
104271	Tex15	testis expressed gene 15	0.0252515	2.85203	0.0198387	0.066938
226747	Ahctf1	AT hook containing transcription factor 1	0.310432	2.8504	0.0198905	0.0670725
225341	Lims2	LIM and senescent cell antigen like domains 2	0.482827	2.84941	0.0199219	0.0670931
66405	Mcts2	malignant T cell amplified sequence 2	0.399971	2.8471	0.0199955	0.0673064
544817	Arhgap27	Rho GTPase activating protein 27	0.219132	2.84684	0.0200039	0.0673145
14674	Gna13	guanine nucleotide binding protein, alpha 13	0.390989	2.84091	0.0201943	0.0678343
81702	Ankrd17	ankyrin repeat domain 17	0.244232	2.83842	0.0202749	0.0680171
27387	Sh2d3c	SH2 domain containing 3C	0.374112	2.83726	0.0203127	0.0680904
17169	Mark3	MAP/microtubule affinity regulating kinase 3	0.373527	2.83498	0.0203869	0.0682176
54130	Actr1a	ARP1 actin-related protein 1A, centractin alpha	0.261854	2.83235	0.0204727	0.0684334
19687	Rfc1	replication factor C (activator 1) 1	0.18705	2.83226	0.0204756	0.0684334
67181	Ctdnep1	CTD nuclear envelope phosphatase 1	0.229039	2.82603	0.0206807	0.0689358
12815	Col11a2	collagen, type XI, alpha 2	0.2485	2.82272	0.0207902	0.0691617
21376	Tbrg1	transforming growth factor beta regulated gene 1	0.286314	2.82019	0.0208747	0.0693372
216705	Clint1	clathrin interactor 1	0.26141	2.81866	0.0209257	0.0694046
234138	Tti2	TELO2 interacting protein 2	0.274457	2.8165	0.0209981	0.0695677
210973	Kbtbd2	kelch repeat and BTB (POZ) domain containing 2	0.268906	2.81638	0.0210023	0.0695677
106039	Gga1	golgi associated, gamma adaptin ear containing, ARF binding protein 1	0.330992	2.81382	0.0210886	0.0698015
13495	Drg2	developmentally regulated GTP binding protein 2	0.242387	2.81329	0.0211062	0.0698393
20855	Stc1	stanniocalcin 1	0.225425	2.808	0.0212857	0.0703101
12757	Clta	clathrin, light polypeptide (Lca)	0.334364	2.80719	0.0213134	0.070381
14694	Rack1	receptor for activated C kinase 1	0.362154	2.80118	0.0215193	0.0709364
12495	Entpd1	ectonucleoside triphosphate diphosphohydrolase 1	0.255624	2.79839	0.0216156	0.0711917
268420	Alkbh5	alkB homolog 5, RNA demethylase	0.368136	2.79751	0.021646	0.0712713
13666	Eif2ak3	eukaryotic translation initiation factor 2 alpha kinase 3	0.29288	2.79423	0.02176	0.071584
210044	Adcy2	adenylate cyclase 2	0.274309	2.7909	0.0218764	0.0719221
66423	Coprs	coordinator of PRMT5, differentiation stimulator	0.590906	2.79029	0.0218979	0.071954
268903	Nrip1	nuclear receptor interacting protein 1	0.351896	2.7897	0.0219184	0.0719795
50789	Fbxl3	F-box and leucine-rich repeat protein 3	0.34334	2.78438	0.022106	0.0724691
26413	Mapk1	mitogen-activated protein kinase 1	0.375614	2.78203	0.0221895	0.0727219
68031	Rnf146	ring finger protein 146	0.295417	2.7805	0.0222438	0.0728425
13090	Cyp2b19	cytochrome P450, family 2, subfamily b, polypeptide 19	0.250815	2.78039	0.0222479	0.0728425
56632	Sphk2	sphingosine kinase 2	0.347075	2.77787	0.0223377	0.0730595
100503895	Tpsab1	tryptase alpha/beta 1	0.109285	2.77625	0.0223957	0.0731857
11776	Ap3d1	adaptor-related protein complex 3, delta 1 subunit	0.427777	2.77439	0.0224626	0.0733665
104570	Ppp4r3b	protein phosphatase 4 regulatory subunit 3B	0.327761	2.77395	0.0224786	0.0733665
27045	Nit1	nitrilase 1	0.289319	2.77393	0.0224792	0.0733665
14455	Gas5	growth arrest specific 5	0.383331	2.76998	0.0226218	0.0737541
225870	Rin1	Ras and Rab interactor 1	0.174703	2.76932	0.0226457	0.0738
432940	Otulin	OTU deubiquitinase with linear linkage specificity	0.564487	2.76832	0.022682	0.0738865
18591	Pdgfb	platelet derived growth factor, B polypeptide	0.354004	2.76343	0.0228608	0.074383
21425	Tfeb	transcription factor EB	0.169182	2.76296	0.022878	0.0744162
21859	Timp3	tissue inhibitor of metalloproteinase 3	0.414369	2.76214	0.0229078	0.0744504
18789	Papola	poly (A) polymerase alpha	0.373134	2.76061	0.0229642	0.0745694
106064	AW549877	expressed sequence AW549877	0.351087	2.75778	0.0230687	0.0748658
13712	Elk1	ELK1, member of ETS oncogene family	0.236853	2.75638	0.0231203	0.074929
21379	Tbrg4	transforming growth factor beta regulated gene 4	0.276655	2.75635	0.0231213	0.074929
107338	Gbf1	golgi-specific brefeldin A-resistance factor 1	0.323669	2.75234	0.0232706	0.0753048
56771	Med20	mediator complex subunit 20	0.30381	2.75121	0.023313	0.0753773
80880	Kank3	KN motif and ankyrin repeat domains 3	0.387281	2.75	0.0233582	0.0754587
106583	Scaf8	SR-related CTD-associated factor 8	0.209698	2.74889	0.0233999	0.0755502
28040	D6Wsu163e	DNA segment, Chr 6, Wayne State University 163, expressed	0.270155	2.74567	0.023521	0.0758762
170789	Acot8	acyl-CoA thioesterase 8	0.368108	2.73689	0.0238543	0.076864
108089	Rnf144a	ring finger protein 144A	0.370669	2.73625	0.023879	0.0769216
66440	Cdc26	cell division cycle 26	0.181749	2.73513	0.0239217	0.0770154
69554	Klhdc2	kelch domain containing 2	0.233371	2.73019	0.024112	0.0774736
494468	Armcx5	armadillo repeat containing, X-linked 5	0.281221	2.72751	0.0242162	0.0777198
52712	Zkscan6	zinc finger with KRAB and SCAN domains 6	0.324947	2.723	0.024392	0.0781732
20901	Strap	serine/threonine kinase receptor associated protein	0.282849	2.71979	0.0245182	0.0785331
78929	Polr3h	polymerase (RNA) III (DNA directed) polypeptide H	0.350397	2.71828	0.0245773	0.0786779
11789	Apc	APC, WNT signaling pathway regulator	0.311706	2.71749	0.0246086	0.0787337
67900	Mtfp1	mitochondrial fission process 1	0.319953	2.71019	0.0248985	0.0795712
12388	Ctnnd1	catenin (cadherin associated protein), delta 1	0.323167	2.70765	0.0250002	0.0798384
72169	Trim29	tripartite motif-containing 29	0.0612821	2.69719	0.025424	0.0808846
215814	Ccdc28a	coiled-coil domain containing 28A	0.27667	2.69646	0.0254538	0.0809341
22027	Hsp90b1	heat shock protein 90, beta (Grp94), member 1	0.252258	2.6943	0.025542	0.0811382
67920	Mak16	MAK16 homolog	0.325668	2.69378	0.0255636	0.0811691
66757	Adat2	adenosine deaminase, tRNA-specific 2	0.235294	2.6916	0.0256532	0.0813394
21380	Tbx1	T-box 1	0.0550337	2.68941	0.0257435	0.08158
20595	Smn1	survival motor neuron 1	0.368289	2.68903	0.0257591	0.0816064
67245	Peli1	pellino 1	0.327618	2.68732	0.02583	0.081694
170760	Acbd3	acyl-Coenzyme A binding domain containing 3	0.331765	2.68389	0.0259729	0.0820957
216363	Rab3ip	RAB3A interacting protein	0.285994	2.68357	0.0259861	0.0820957
13078	Cyp1b1	cytochrome P450, family 1, subfamily b, polypeptide 1	0.345753	2.68228	0.0260403	0.082198
240283	Dmxl1	Dmx-like 1	0.284239	2.67921	0.0261689	0.082466
83768	Dpp7	dipeptidylpeptidase 7	0.359104	2.67853	0.0261975	0.0825293
331401	Thoc2	THO complex 2	0.25545	2.67762	0.0262359	0.0825849
22290	Uty	ubiquitously transcribed tetratricopeptide repeat gene, Y chromosome	0.160356	2.67382	0.0263965	0.0830214
12484	Cd24a	CD24a antigen	0.588405	2.67235	0.0264587	0.0831244
67239	Rpf2	ribosome production factor 2 homolog	0.358526	2.6706	0.0265336	0.083244
70536	Qpct	glutaminyl-peptide cyclotransferase (glutaminyl cyclase)	0.196324	2.66658	0.0267053	0.0836437
56215	Acin1	apoptotic chromatin condensation inducer 1	0.225607	2.66599	0.0267306	0.0836996
70465	Wdr77	WD repeat domain 77	0.380445	2.66222	0.0268933	0.0841393
72999	Insig2	insulin induced gene 2	0.352146	2.66185	0.0269092	0.0841656
68493	Ndufaf4	NADH:ubiquinone oxidoreductase complex assembly factor 4	0.306741	2.65905	0.0270305	0.0844283
328133	Slc39a9	solute carrier family 39 (zinc transporter), member 9	0.454028	2.65827	0.0270643	0.0845106
76740	Efr3a	EFR3 homolog A	0.36744	2.65752	0.0270969	0.0845657
58800	Trpm7	transient receptor potential cation channel, subfamily M, member 7	0.362383	2.65341	0.0272768	0.0850803
74192	Arpc5l	actin related protein 2/3 complex, subunit 5-like	0.371891	2.65195	0.0273407	0.0852559
217011	Nle1	notchless homolog 1	0.202185	2.65065	0.0273979	0.0853589
69714	Tfpt	TCF3 (E2A) fusion partner	0.399424	2.64976	0.0274372	0.0854192
12042	Bcl10	B cell leukemia/lymphoma 10	0.367731	2.64841	0.0274971	0.0855078
76580	Mib2	mindbomb E3 ubiquitin protein ligase 2	0.295213	2.64729	0.0275466	0.0855912
71371	Arid5b	AT rich interactive domain 5B (MRF1-like)	0.372164	2.64456	0.0276677	0.0858731
76130	Las1l	LAS1-like (S. cerevisiae)	0.193148	2.64302	0.0277361	0.0859912
11642	Akap3	A kinase (PRKA) anchor protein 3	0.0623688	2.64214	0.0277753	0.0860891
22239	Ugt8a	UDP galactosyltransferase 8A	0.0712288	2.64093	0.0278294	0.0862331
72020	Zfp654	zinc finger protein 654	0.248324	2.64017	0.0278634	0.0863148
270624	Spin4	spindlin family, member 4	0.146667	2.6368	0.0280149	0.0866654
94227	Pi15	peptidase inhibitor 15	0.0633761	2.63067	0.0282928	0.0873339
59289	Ackr2	atypical chemokine receptor 2	0.14886	2.62996	0.028325	0.0874095
20349	Sema3e	sema domain, immunoglobulin domain (Ig), short basic domain, secreted, (semaphorin) 3E	0.103603	2.62929	0.0283556	0.0874802
72333	Palld	palladin, cytoskeletal associated protein	0.104045	2.62786	0.028421	0.0876238
227800	Rabgap1	RAB GTPase activating protein 1	0.349387	2.62776	0.0284254	0.0876238
78244	Dnajc21	DnaJ heat shock protein family (Hsp40) member C21	0.27123	2.6273	0.0284466	0.0876651
381990	Zbtb2	zinc finger and BTB domain containing 2	0.317415	2.62213	0.0286841	0.0882047
80981	Arl4d	ADP-ribosylation factor-like 4D	0.543135	2.62036	0.0287659	0.0884322
20522	Slc23a1	solute carrier family 23 (nucleobase transporters), member 1	0.198495	2.61767	0.0288904	0.0887668
74374	Clec16a	C-type lectin domain family 16, member A	0.227762	2.61737	0.0289046	0.0887862
20591	Kdm5c	lysine (K)-specific demethylase 5C	0.410373	2.61451	0.0290378	0.0891471
70247	Psmd1	proteasome (prosome, macropain) 26S subunit, non-ATPase, 1	0.344345	2.60975	0.0292612	0.0896673
66663	Uba5	ubiquitin-like modifier activating enzyme 5	0.440413	2.60953	0.0292715	0.0896698
67399	Pdlim7	PDZ and LIM domain 7	0.240426	2.60766	0.0293596	0.0898248
67891	Rpl4	ribosomal protein L4	0.217367	2.60761	0.0293618	0.0898248
20350	Sema3f	sema domain, immunoglobulin domain (Ig), short basic domain, secreted, (semaphorin) 3F	0.279925	2.6066	0.0294096	0.0898981
14629	Gclc	glutamate-cysteine ligase, catalytic subunit	0.411265	2.60404	0.0295311	0.0902206
56321	Aatf	apoptosis antagonizing transcription factor	0.412941	2.60056	0.029697	0.0907029
18828	Plscr2	phospholipid scramblase 2	0.223121	2.59893	0.0297751	0.0908925
69257	Elf2	E74-like factor 2	0.228776	2.59852	0.0297947	0.0909276
18703	Pigr	polymeric immunoglobulin receptor	0.130956	2.59526	0.0299513	0.0913397
27357	Gyg	glycogenin	0.417303	2.58816	0.0302958	0.0921825
229603	Otud7b	OTU domain containing 7B	0.277954	2.58524	0.0304386	0.0925182
22258	Usp4	ubiquitin specific peptidase 4 (proto-oncogene)	0.323421	2.58219	0.0305882	0.0928558
226591	Tiprl	TIP41, TOR signalling pathway regulator-like (S. cerevisiae)	0.257716	2.58096	0.0306487	0.0930069
80879	Slc16a3	solute carrier family 16 (monocarboxylic acid transporters), member 3	0.248093	2.58068	0.0306626	0.0930243
223864	Rapgef3	Rap guanine nucleotide exchange factor (GEF) 3	0.453984	2.57865	0.0307629	0.0932973
19192	Psme3	proteaseome (prosome, macropain) activator subunit 3 (PA28 gamma, Ki)	0.176735	2.57789	0.0308006	0.0933675
14536	Nr6a1	nuclear receptor subfamily 6, group A, member 1	0.213382	2.57449	0.0309696	0.0937793
70999	Naa40	N(alpha)-acetyltransferase 40, NatD catalytic subunit	0.506845	2.57374	0.0310073	0.0938433
22121	Rpl13a	ribosomal protein L13A	0.434656	2.56938	0.0312259	0.0943565
353187	Nr1d2	nuclear receptor subfamily 1, group D, member 2	0.325178	2.56935	0.0312269	0.0943565
213895	Bms1	BMS1, ribosome biogenesis factor	0.263219	2.56587	0.0314024	0.0947856
51799	Rundc3a	RUN domain containing 3A	0.322911	2.56461	0.0314663	0.0949276
78521	B230219D22Rik	RIKEN cDNA B230219D22 gene	0.370065	2.56089	0.0316555	0.0954475
72515	Wdr43	WD repeat domain 43	0.306343	2.56002	0.0316999	0.0955267
73233	Zfp942	zinc finger protein 942	0.194182	2.5566	0.0318747	0.0959807
11495	Adam2	a disintegrin and metallopeptidase domain 2	0.125266	2.55363	0.0320279	0.0963393
75612	Gns	glucosamine (N-acetyl)-6-sulfatase	0.296737	2.55268	0.0320768	0.0964606
67089	Psmc6	proteasome (prosome, macropain) 26S subunit, ATPase, 6	0.457758	2.55232	0.0320954	0.0964911
72727	B3gat3	beta-1,3-glucuronyltransferase 3 (glucuronosyltransferase I)	0.356951	2.55007	0.0322119	0.0968155
21753	Tes	testis derived transcript	0.307595	2.54534	0.0324585	0.0973183
20227	Sart1	squamous cell carcinoma antigen recognized by T cells 1	0.106396	2.54428	0.0325137	0.097412
67755	Ddx47	DEAD (Asp-Glu-Ala-Asp) box polypeptide 47	0.177485	2.54241	0.0326119	0.0976053
70118	Srrd	SRR1 domain containing	0.344887	2.5421	0.0326282	0.097615
57738	Slc15a2	solute carrier family 15 (H+/peptide transporter), member 2	0.485825	2.53885	0.0327993	0.098008
74094	Tjap1	tight junction associated protein 1	0.318222	2.53867	0.0328088	0.0980103
12211	Birc6	baculoviral IAP repeat-containing 6	0.334139	2.5356	0.0329713	0.098314
228545	Vps18	VPS18 CORVET/HOPS core subunit	0.24475	2.5348	0.0330139	0.0984153
26897	Acot1	acyl-CoA thioesterase 1	1.06283	2.5339	0.0330621	0.0985136
14201	Fhl3	four and a half LIM domains 3	0.507557	2.53369	0.033073	0.0985136
80292	Zxdc	ZXD family zinc finger C	0.213459	2.5321	0.0331581	0.0987411
329015	Atg2a	autophagy related 2A	0.302932	2.53116	0.0332084	0.0988386
13180	Pcbd1	pterin 4 alpha carbinolamine dehydratase/dimerization cofactor of hepatocyte nuclear factor 1 alpha (TCF1) 1	0.410843	2.53037	0.0332505	0.0989119
18518	Igbp1	immunoglobulin (CD79A) binding protein 1	0.152965	2.52714	0.033424	0.0993756
72056	1810055G02Rik	RIKEN cDNA 1810055G02 gene	0.398216	2.52426	0.0335793	0.0998113
68818	Zfand2b	zinc finger, AN1 type domain 2B	0.531208	2.52367	0.0336114	0.0998805
22334	Vdac2	voltage-dependent anion channel 2	0.201598	2.52315	0.0336397	0.0999381
69852	Tcf23	transcription factor 23	0.116695	2.5223	0.0336856	0.100048
54189	Rabep1	rabaptin, RAB GTPase binding effector protein 1	0.326804	2.51818	0.0339098	0.10053
14605	Tsc22d3	TSC22 domain family, member 3	0.491763	2.51187	0.0342564	0.101477
14154	Fem1a	feminization 1 homolog a (C. elegans)	0.30162	2.50794	0.0344738	0.101988
66810	Rbm22	RNA binding motif protein 22	0.389182	2.50575	0.0345959	0.102269
56494	Gosr2	golgi SNAP receptor complex member 2	0.308811	2.50243	0.0347814	0.102656
19177	Psmb7	proteasome (prosome, macropain) subunit, beta type 7	0.381876	2.49392	0.0352615	0.10391
19182	Psmc3	proteasome (prosome, macropain) 26S subunit, ATPase 3	0.320509	2.49249	0.0353428	0.104068
69540	Klk10	kallikrein related-peptidase 10	0.122278	2.4904	0.0354621	0.104322
227298	Retreg2	reticulophagy regulator family member 2	0.319787	2.49018	0.0354749	0.104322
64833	Acot10	acyl-CoA thioesterase 10	0.27528	2.48942	0.035518	0.104369
66979	Pole4	polymerase (DNA-directed), epsilon 4 (p12 subunit)	0.325487	2.48941	0.0355188	0.104369
53417	Hif3a	hypoxia inducible factor 3, alpha subunit	0.0895581	2.48851	0.0355706	0.104494
26936	Mprip	myosin phosphatase Rho interacting protein	0.349993	2.48521	0.0357601	0.104915
58184	Cnot9	CCR4-NOT transcription complex, subunit 9	0.218738	2.48451	0.0358005	0.104974
18121	Nog	noggin	0.107578	2.48063	0.0360248	0.105522
71745	Cul2	cullin 2	0.248813	2.4805	0.0360322	0.105522
18771	Pknox1	Pbx/knotted 1 homeobox	0.28801	2.47979	0.036074	0.105577
17341	Bhlha15	basic helix-loop-helix family, member a15	0.0780642	2.47954	0.0360883	0.105577
56041	Uso1	USO1 vesicle docking factor	0.246516	2.47934	0.0361	0.105583
72831	Dhx30	DEAH (Asp-Glu-Ala-His) box polypeptide 30	0.357308	2.47889	0.0361258	0.105623
227377	Farp2	FERM, RhoGEF and pleckstrin domain protein 2	0.180073	2.47568	0.0363135	0.105934
12633	Cflar	CASP8 and FADD-like apoptosis regulator	0.254201	2.47378	0.0364247	0.106204
22785	Slc30a4	solute carrier family 30 (zinc transporter), member 4	0.345219	2.47195	0.0365324	0.106429
170757	Adgrl4	adhesion G protein-coupled receptor L4	0.367314	2.47185	0.0365385	0.106429
16416	Itgb3	integrin beta 3	0.0858561	2.47183	0.0365397	0.106429
66631	Mfsd14b	major facilitator superfamily domain containing 14B	0.378411	2.46975	0.036662	0.106703
69640	Fam83g	family with sequence similarity 83, member G	0.2087	2.46804	0.0367636	0.106971
22234	Ugcg	UDP-glucose ceramide glucosyltransferase	0.210259	2.46682	0.0368355	0.107086
75624	Metap1	methionyl aminopeptidase 1	0.303708	2.4611	0.0371768	0.107951
19877	Rock1	Rho-associated coiled-coil containing protein kinase 1	0.278673	2.45941	0.0372783	0.10819
75320	Etnk1	ethanolamine kinase 1	0.326386	2.4584	0.0373391	0.108311
12585	Cdr2	cerebellar degeneration-related 2	0.280982	2.45823	0.0373491	0.108312
233724	Tmem41b	transmembrane protein 41B	0.240901	2.45666	0.0374439	0.108504
269113	Nup54	nucleoporin 54	0.220264	2.45544	0.0375173	0.108661
18521	Pcbp2	poly(rC) binding protein 2	0.126256	2.45457	0.0375699	0.108686
66611	Ribc1	RIB43A domain with coiled-coils 1	0.39492	2.45451	0.0375741	0.108686
18230	Nxn	nucleoredoxin	0.280799	2.45295	0.0376686	0.108904
69757	Leng1	leukocyte receptor cluster (LRC) member 1	0.232842	2.44937	0.0378864	0.10931
16477	Junb	jun B proto-oncogene	0.501126	2.44644	0.0380659	0.109716
20016	Polr1c	polymerase (RNA) I polypeptide C	0.450062	2.44578	0.0381064	0.109765
67382	Brd3	bromodomain containing 3	0.271107	2.4449	0.0381604	0.109869
52874	Pum3	pumilio RNA-binding family member 3	0.225644	2.43592	0.0387163	0.111137
170643	Kirrel	kirre like nephrin family adhesion molecule 1	0.226697	2.43247	0.0389326	0.111617
16776	Lama5	laminin, alpha 5	0.239087	2.43033	0.039067	0.111832
22697	Zscan21	zinc finger and SCAN domain containing 21	0.298039	2.43008	0.0390827	0.111835
14084	Faf1	Fas-associated factor 1	0.263236	2.43	0.0390878	0.111835
101861	Ints4	integrator complex subunit 4	0.282741	2.42976	0.0391028	0.111849
18605	Enpp1	ectonucleotide pyrophosphatase/phosphodiesterase 1	0.0602303	2.42802	0.0392129	0.112108
56389	Stx5a	syntaxin 5A	0.293069	2.41914	0.0397778	0.113293
230810	Slc30a2	solute carrier family 30 (zinc transporter), member 2	0.123418	2.41607	0.0399751	0.113732
12785	Cnbp	cellular nucleic acid binding protein	0.171324	2.41584	0.0399897	0.113732
73825	Ppp1r21	protein phosphatase 1, regulatory subunit 21	0.302778	2.41571	0.039998	0.113732
16153	Il10	interleukin 10	0.0834447	2.41565	0.0400024	0.113732
72960	Top1mt	DNA topoisomerase 1, mitochondrial	0.352088	2.41055	0.0403322	0.114497
11692	Gfer	growth factor, augmenter of liver regeneration	0.305377	2.40405	0.040757	0.115442
80517	Herpud2	HERPUD family member 2	0.175235	2.4016	0.0409178	0.115811
214290	Tut7	terminal uridylyl transferase 7	0.268769	2.4006	0.040984	0.115888
226245	Plekhs1	pleckstrin homology domain containing, family S member 1	0.175118	2.39964	0.0410476	0.115917
218952	Fermt2	fermitin family member 2	0.206632	2.39751	0.0411887	0.116232
19883	Rora	RAR-related orphan receptor alpha	0.219461	2.39699	0.0412236	0.116298
224826	Ubr2	ubiquitin protein ligase E3 component n-recognin 2	0.345167	2.39651	0.0412548	0.116357
26419	Mapk8	mitogen-activated protein kinase 8	0.387907	2.38776	0.0418408	0.117658
56517	Slc22a21	solute carrier family 22 (organic cation transporter), member 21	0.49626	2.38482	0.0420394	0.118099
170791	Rbm39	RNA binding motif protein 39	0.333807	2.38429	0.0420753	0.118148
22223	Uchl1	ubiquitin carboxy-terminal hydrolase L1	0.118709	2.38348	0.0421305	0.118267
57339	Jph1	junctophilin 1	0.454124	2.38222	0.0422158	0.118476
13487	Slc26a3	solute carrier family 26, member 3	0.0233109	2.38188	0.042239	0.118491
103710	Slc35e4	solute carrier family 35, member E4	0.326867	2.37995	0.0423705	0.118766
212391	Lcor	ligand dependent nuclear receptor corepressor	0.245111	2.37852	0.0424683	0.118943
76295	Atp11b	ATPase, class VI, type 11B	0.177402	2.3784	0.0424768	0.118943
12747	Clk1	CDC-like kinase 1	0.395246	2.37564	0.0426658	0.119304
107769	Tm6sf1	transmembrane 6 superfamily member 1	0.26925	2.37543	0.0426803	0.119304
60507	Qtrt1	queuine tRNA-ribosyltransferase catalytic subunit 1	0.471895	2.37535	0.0426863	0.119304
28193	Reep3	receptor accessory protein 3	0.241927	2.37533	0.0426873	0.119304
74302	Mtmr3	myotubularin related protein 3	0.298926	2.36646	0.0433016	0.120567
11974	Atp6v0e	ATPase, H+ transporting, lysosomal V0 subunit E	0.324106	2.36607	0.043329	0.120594
12411	Cbs	cystathionine beta-synthase	0.140869	2.36454	0.0434356	0.120812
56075	Pdss1	prenyl (solanesyl) diphosphate synthase, subunit 1	0.309387	2.36418	0.0434613	0.120833
386612	Thoc6	THO complex 6	0.554546	2.36258	0.0435735	0.121024
57276	Vsig2	V-set and immunoglobulin domain containing 2	0.562938	2.36183	0.043626	0.121082
68770	Phtf2	putative homeodomain transcription factor 2	0.263947	2.35823	0.0438798	0.121637
226251	Ablim1	actin-binding LIM protein 1	0.315094	2.35554	0.0440706	0.122106
11764	Ap1b1	adaptor protein complex AP-1, beta 1 subunit	0.229991	2.35323	0.0442343	0.12247
78757	Rictor	RPTOR independent companion of MTOR, complex 2	0.307651	2.35261	0.0442784	0.122539
22715	Zfp57	zinc finger protein 57	0.0848908	2.35258	0.0442807	0.122539
19158	Cyth2	cytohesin 2	0.27762	2.35184	0.0443339	0.12263
18813	Pa2g4	proliferation-associated 2G4	0.221102	2.35154	0.044355	0.12263
74480	Samd4	sterile alpha motif domain containing 4	0.185519	2.35148	0.0443594	0.12263
14807	Grik3	glutamate receptor, ionotropic, kainate 3	0.0228589	2.34903	0.0445346	0.12294
16341	Eif3e	eukaryotic translation initiation factor 3, subunit E	0.329194	2.34723	0.0446643	0.123214
214764	Edrf1	erythroid differentiation regulatory factor 1	0.202407	2.34485	0.0448357	0.12356
97130	C77080	expressed sequence C77080	0.173286	2.34407	0.0448919	0.123685
14121	Fbp1	fructose bisphosphatase 1	0.378261	2.34217	0.0450293	0.124003
235431	Coro2b	coronin, actin binding protein, 2B	0.184118	2.34035	0.0451621	0.124308
67019	Actr6	ARP6 actin-related protein 6	0.300904	2.33697	0.0454084	0.124926
12952	Cry1	cryptochrome 1 (photolyase-like)	0.32753	2.33576	0.0454966	0.125107
66805	Tspan1	tetraspanin 1	0.118141	2.33282	0.0457125	0.125579
244867	Arhgap20	Rho GTPase activating protein 20	0.05771	2.33208	0.0457671	0.125668
14465	Gata6	GATA binding protein 6	0.0868832	2.33112	0.045838	0.125771
69009	Thap7	THAP domain containing 7	0.347693	2.33003	0.0459185	0.125933
98766	Ubac1	ubiquitin associated domain containing 1	0.341774	2.32944	0.045962	0.125989
26444	Psma7	proteasome (prosome, macropain) subunit, alpha type 7	0.343158	2.32837	0.0460416	0.12616
21771	Utp4	UTP4 small subunit processome component	0.353191	2.3283	0.0460467	0.12616
66641	Sike1	suppressor of IKBKE 1	0.262478	2.32767	0.0460937	0.126233
59007	Ngly1	N-glycanase 1	0.315345	2.32691	0.0461498	0.12632
66989	Kctd20	potassium channel tetramerisation domain containing 20	0.265689	2.3263	0.0461953	0.126414
98732	Rab3gap2	RAB3 GTPase activating protein subunit 2	0.304992	2.32229	0.0464944	0.12714
73274	Gpbp1	GC-rich promoter binding protein 1	0.326353	2.3194	0.0467116	0.127672
70233	Cd2bp2	CD2 cytoplasmic tail binding protein 2	0.231694	2.31679	0.0469083	0.128086
13612	Edil3	EGF-like repeats and discoidin I-like domains 3	0.0411514	2.31488	0.0470524	0.128379
20463	Cox7a2l	cytochrome c oxidase subunit 7A2 like	0.409904	2.31462	0.047072	0.128379
218699	Pxk	PX domain containing serine/threonine kinase	0.318798	2.31462	0.0470722	0.128379
15214	Hey2	hairy/enhancer-of-split related with YRPW motif 2	0.300487	2.31444	0.0470861	0.128386
66711	Sbds	SBDS ribosome maturation factor	0.248824	2.31111	0.0473386	0.12895
67015	Ccdc91	coiled-coil domain containing 91	0.180215	2.31062	0.0473766	0.129019
76501	Commd9	COMM domain containing 9	0.332647	2.30894	0.047505	0.129278
22413	Wnt2	wingless-type MMTV integration site family, member 2	0.0641602	2.3061	0.0477219	0.12965
30957	Mapk8ip3	mitogen-activated protein kinase 8 interacting protein 3	0.263347	2.30469	0.0478304	0.129821
54607	Socs6	suppressor of cytokine signaling 6	0.191977	2.30118	0.0481018	0.130418
74144	Robo4	roundabout guidance receptor 4	0.436077	2.29907	0.0482651	0.130749
20474	Six4	sine oculis-related homeobox 4	0.194127	2.29829	0.0483258	0.130851
78455	Helz	helicase with zinc finger domain	0.147434	2.29808	0.0483424	0.130865
232784	Zfp212	Zinc finger protein 212	0.190353	2.29769	0.0483725	0.130915
66448	Mrpl20	mitochondrial ribosomal protein L20	0.27958	2.29591	0.0485116	0.131197
381356	Cacfd1	calcium channel flower domain containing 1	0.0948804	2.29411	0.0486523	0.131515
56070	Tcerg1	transcription elongation regulator 1 (CA150)	0.177066	2.29203	0.0488151	0.131923
80720	Pbx4	pre B cell leukemia homeobox 4	0.116181	2.29141	0.0488642	0.132024
67154	Mtdh	metadherin	0.207858	2.28779	0.0491498	0.132638
12532	Cdc25c	cell division cycle 25C	0.0457342	2.28515	0.0493588	0.133136
56486	Gabarap	gamma-aminobutyric acid receptor associated protein	0.311374	2.28471	0.0493934	0.133136
70044	Tut1	terminal uridylyl transferase 1, U6 snRNA-specific	0.301829	2.28428	0.0494279	0.133197
319448	Fndc3a	fibronectin type III domain containing 3A	0.209763	2.28275	0.0495497	0.133395
15463	Agfg1	ArfGAP with FG repeats 1	0.196822	2.28262	0.0495602	0.133395
74241	Chpf	chondroitin polymerizing factor	0.255536	2.27703	0.0500077	0.134344
107652	Uap1	UDP-N-acetylglucosamine pyrophosphorylase 1	0.328126	2.27608	0.0500841	0.134453
18976	Pomc	pro-opiomelanocortin-alpha	0.230376	2.2731	0.0503249	0.135035
66261	Tm4sf20	transmembrane 4 L six family member 20	0.358453	2.27236	0.0503847	0.13512
108078	Olr1	oxidized low density lipoprotein (lectin-like) receptor 1	0.0319763	2.27206	0.0504093	0.13512
64340	Dhx38	DEAH (Asp-Glu-Ala-His) box polypeptide 38	0.326441	2.27198	0.050416	0.13512
15936	Ier2	immediate early response 2	0.371647	2.27088	0.050505	0.135316
56335	Mettl3	methyltransferase like 3	0.208909	2.27078	0.0505133	0.135316
13211	Dhx9	DEAH (Asp-Glu-Ala-His) box polypeptide 9	0.229349	2.26777	0.0507581	0.135843
64381	Ms4a8a	membrane-spanning 4-domains, subfamily A, member 8A	0.316474	2.26342	0.0511145	0.136522
21828	Thbs4	thrombospondin 4	0.492243	2.26318	0.0511342	0.136522
17191	Mbd2	methyl-CpG binding domain protein 2	0.251283	2.25758	0.0515967	0.137534
74196	Ttc27	tetratricopeptide repeat domain 27	0.295431	2.25685	0.0516574	0.137599
140887	Lnx2	ligand of numb-protein X 2	0.226708	2.25599	0.0517289	0.13775
19157	Cyth1	cytohesin 1	0.347443	2.25054	0.0521845	0.138742
14661	Glud1	glutamate dehydrogenase 1	0.33173	2.24831	0.0523717	0.139146
16832	Ldhb	lactate dehydrogenase B	0.12775	2.2475	0.0524398	0.139268
17152	Mak	male germ cell-associated kinase	0.16394	2.24745	0.052444	0.139268
55944	Eif3d	eukaryotic translation initiation factor 3, subunit D	0.303608	2.24509	0.0526434	0.139699
67298	Gprasp1	G protein-coupled receptor associated sorting protein 1	0.206875	2.24086	0.0530025	0.14052
13447	Doc2b	double C2, beta	0.0551601	2.23676	0.0533531	0.141284
66208	Nenf	neuron derived neurotrophic factor	0.337905	2.23629	0.0533935	0.141335
75812	Tasp1	taspase, threonine aspartase 1	0.114034	2.23255	0.0537151	0.142076
17344	Pias2	protein inhibitor of activated STAT 2	0.199908	2.23216	0.0537494	0.142134
17063	Muc13	mucin 13, epithelial transmembrane	0.0483248	2.23162	0.0537956	0.142223
226525	Rasal2	RAS protein activator like 2	0.253262	2.23139	0.0538158	0.142243
70790	Ubr5	ubiquitin protein ligase E3 component n-recognin 5	0.270418	2.2301	0.0539272	0.142492
19227	Pthlh	parathyroid hormone-like peptide	0.104578	2.22978	0.0539553	0.142492
50530	Mfap5	microfibrillar associated protein 5	0.278697	2.22829	0.0540846	0.142753
68016	Cavin4	caveolae associated 4	0.48825	2.22736	0.0541655	0.1429
66201	Vta1	vesicle (multivesicular body) trafficking 1	0.301098	2.22662	0.0542298	0.142969
14625	Gykl1	glycerol kinase-like 1	0.194533	2.22604	0.0542803	0.143069
21345	Tagln	transgelin	0.363939	2.22406	0.0544528	0.143491
57296	Psmd8	proteasome (prosome, macropain) 26S subunit, non-ATPase, 8	0.212782	2.22375	0.0544802	0.143496
74383	Ubap2l	ubiquitin-associated protein 2-like	0.126896	2.22185	0.0546467	0.143901
170676	Peg10	paternally expressed 10	0.0833228	2.22103	0.0547191	0.144058
232023	Vopp1	vesicular, overexpressed in cancer, prosurvival protein 1	0.188649	2.22033	0.0547806	0.144186
232854	Zfp418	zinc finger protein 418	0.260629	2.21953	0.0548513	0.144339
12385	Ctnna1	catenin (cadherin associated protein), alpha 1	0.353221	2.20991	0.0557054	0.14628
67736	Ccdc130	coiled-coil domain containing 130	0.267171	2.20965	0.0557281	0.146306
54383	Phc2	polyhomeotic 2	0.21634	2.20671	0.0559917	0.146929
230709	Zmpste24	zinc metallopeptidase, STE24	0.177054	2.20362	0.0562706	0.147524
68243	A930018P22Rik	RIKEN cDNA A930018P22 gene	0.260489	2.20088	0.0565189	0.147936
67608	Narf	nuclear prelamin A recognition factor	0.33983	2.19869	0.0567172	0.148351
70208	Med23	mediator complex subunit 23	0.193514	2.19121	0.0574029	0.149764
74203	Eif4enif1	eukaryotic translation initiation factor 4E nuclear import factor 1	0.115232	2.18943	0.0575668	0.149997
81630	Zbtb22	zinc finger and BTB domain containing 22	0.242185	2.18749	0.0577469	0.150349
30926	Glrx3	glutaredoxin 3	0.47823	2.18564	0.0579179	0.150725
76251	Ercc6l2	excision repair cross-complementing rodent repair deficiency, complementation group 6 like 2	0.227932	2.17631	0.0587919	0.152648
20259	Scin	scinderin	0.104294	2.17575	0.0588443	0.15274
64136	Sdf2l1	stromal cell-derived factor 2-like 1	0.310397	2.17496	0.0589188	0.152767
230796	Wdtc1	WD and tetratricopeptide repeats 1	0.35707	2.17379	0.0590298	0.152915
20887	Sult1a1	sulfotransferase family 1A, phenol-preferring, member 1	0.331436	2.17322	0.0590835	0.153019
16525	Kcnk1	potassium channel, subfamily K, member 1	0.0416063	2.16784	0.0595957	0.153993
18554	Pcsk7	proprotein convertase subtilisin/kexin type 7	0.284993	2.16383	0.0599805	0.154846
228875	Slc35c2	solute carrier family 35, member C2	0.15627	2.16248	0.0601101	0.15511
103554	Psme4	proteasome (prosome, macropain) activator subunit 4	0.28973	2.15582	0.0607549	0.15653
74145	F13a1	coagulation factor XIII, A1 subunit	0.433881	2.15523	0.0608126	0.156618
11566	Adss	adenylosuccinate synthetase, non muscle	0.260021	2.15064	0.0612614	0.157492
71702	Cdc5l	cell division cycle 5-like (S. pombe)	0.240044	2.15055	0.0612703	0.157492
21374	Tbp	TATA box binding protein	0.169179	2.14976	0.0613487	0.157633
14427	Galr1	galanin receptor 1	0.267646	2.14972	0.0613526	0.157633
66166	S100a14	S100 calcium binding protein A14	0.140979	2.14475	0.0618432	0.158785
68523	Ciao2b	cytosolic iron-sulfur assembly component 2B	0.193232	2.14093	0.0622223	0.159449
18015	Nf1	neurofibromin 1	0.232063	2.13905	0.0624097	0.159768
13805	Eng	endoglin	0.314424	2.13881	0.0624343	0.159794
67285	Cwc27	CWC27 spliceosome-associated protein	0.224973	2.13819	0.0624964	0.159917
107765	Ankrd1	ankyrin repeat domain 1 (cardiac muscle)	0.108521	2.13657	0.0626588	0.160224
268527	Greb1	gene regulated by estrogen in breast cancer protein	0.0267955	2.13611	0.062705	0.160306
93692	Glrx	glutaredoxin	0.235567	2.13408	0.0629088	0.160718
72454	Ccdc71	coiled-coil domain containing 71	0.14308	2.13374	0.0629429	0.160741
68278	Ddx39	DEAD (Asp-Glu-Ala-Asp) box polypeptide 39	0.244114	2.13371	0.0629461	0.160741
67582	Slc25a26	solute carrier family 25 (mitochondrial carrier, phosphate carrier), member 26	0.140635	2.13297	0.0630205	0.160858
28254	Slco1a6	solute carrier organic anion transporter family, member 1a6	0.0318314	2.13143	0.0631767	0.161039
70579	Zc3h11a	zinc finger CCCH type containing 11A	0.265083	2.13085	0.0632352	0.161151
94315	Prcc	papillary renal cell carcinoma (translocation-associated)	0.388733	2.12828	0.0634954	0.161669
22230	Ufd1	ubiquitin recognition factor in ER-associated degradation 1	0.240879	2.12742	0.0635828	0.161782
78610	Uvrag	UV radiation resistance associated gene	0.206201	2.1271	0.0636153	0.161829
94213	Ddx50	DEAD (Asp-Glu-Ala-Asp) box polypeptide 50	0.212614	2.12563	0.0637655	0.162138
226049	Dmrt2	doublesex and mab-3 related transcription factor 2	0.526389	2.12493	0.063837	0.16221
52898	Rnasek	ribonuclease, RNase K	0.217409	2.12233	0.0641035	0.162704
52535	Mettl17	methyltransferase like 17	0.291962	2.11845	0.0645025	0.163534
69774	Ms4a6b	membrane-spanning 4-domains, subfamily A, member 6B	0.414764	2.11759	0.0645911	0.16365
268656	Sptlc1	serine palmitoyltransferase, long chain base subunit 1	0.352208	2.11748	0.0646034	0.16365
224833	AI661453	expressed sequence AI661453	0.0616995	2.11717	0.0646345	0.16365
56516	Rbms2	RNA binding motif, single stranded interacting protein 2	0.258037	2.11717	0.0646354	0.16365
22680	Zfp207	zinc finger protein 207	0.288021	2.11618	0.0647374	0.163802
67180	Yipf5	Yip1 domain family, member 5	0.307334	2.11617	0.0647386	0.163802
67509	Saysd1	SAYSVFN motif domain containing 1	0.144647	2.11118	0.0652576	0.16482
12409	Cbr2	carbonyl reductase 2	0.431801	2.1068	0.0657158	0.165679
66454	Nmnat1	nicotinamide nucleotide adenylyltransferase 1	0.226893	2.10458	0.0659504	0.165977
69981	Tmem30a	transmembrane protein 30A	0.122027	2.10427	0.0659824	0.16602
18740	Pitx1	paired-like homeodomain transcription factor 1	0.0462037	2.10286	0.0661313	0.166255
13094	Cyp2b9	cytochrome P450, family 2, subfamily b, polypeptide 9	0.718508	2.10278	0.0661406	0.166255
329154	Ankrd44	ankyrin repeat domain 44	0.139171	2.10269	0.0661494	0.166255
14683	Gnas	GNAS (guanine nucleotide binding protein, alpha stimulating) complex locus	0.293924	2.10184	0.0662401	0.166262
11990	Atrn	attractin	0.205499	2.10142	0.0662838	0.166334
20532	Slc3a1	solute carrier family 3, member 1	0.0711658	2.10046	0.0663864	0.166444
13003	Vcan	versican	0.374595	2.10017	0.0664172	0.166469
16469	Jrk	jerky	0.0839684	2.09995	0.0664403	0.166469
228998	Arfgap1	ADP-ribosylation factor GTPase activating protein 1	0.250867	2.09945	0.0664933	0.166553
13002	Dnajc5	DnaJ heat shock protein family (Hsp40) member C5	0.248238	2.09874	0.0665685	0.166679
64383	Sirt2	sirtuin 2	0.208065	2.09521	0.0669456	0.167512
211945	Plekhh1	pleckstrin homology domain containing, family H (with MyTH4 domain) member 1	0.0739959	2.09374	0.0671034	0.16787
232164	Paip2b	poly(A) binding protein interacting protein 2B	0.248434	2.09163	0.0673303	0.168288
67516	Kctd4	potassium channel tetramerisation domain containing 4	0.175136	2.09122	0.0673743	0.168361
67418	Ppil4	peptidylprolyl isomerase (cyclophilin)-like 4	0.207672	2.09068	0.0674323	0.168416
11464	Actc1	actin, alpha, cardiac muscle 1	0.600608	2.08944	0.0675655	0.168514
66471	Anp32e	acidic (leucine-rich) nuclear phosphoprotein 32 family, member E	0.264815	2.08735	0.0677916	0.168956
69162	Sec31a	Sec31 homolog A (S. cerevisiae)	0.260305	2.0852	0.0680254	0.169464
12491	Cd36	CD36 molecule	0.26149	2.08413	0.068142	0.169717
378431	Txlnb	taxilin beta	0.516914	2.0839	0.0681668	0.169742
72114	Zbed3	zinc finger, BED type containing 3	0.154811	2.08353	0.0682065	0.169766
26896	Med14	mediator complex subunit 14	0.21169	2.08063	0.0685241	0.170406
26939	Polr3e	polymerase (RNA) III (DNA directed) polypeptide E	0.21624	2.07936	0.0686628	0.170714
18552	Pcsk5	proprotein convertase subtilisin/kexin type 5	0.179549	2.07822	0.0687884	0.170888
14184	Fgfr3	fibroblast growth factor receptor 3	0.177129	2.07817	0.0687933	0.170888
22329	Vcam1	vascular cell adhesion molecule 1	0.463876	2.07435	0.0692148	0.171746
68205	Urm1	ubiquitin related modifier 1	0.285586	2.07251	0.0694184	0.172122
17121	Mxd3	Max dimerization protein 3	0.122027	2.0725	0.0694192	0.172122
54720	Rcan1	regulator of calcineurin 1	0.274262	2.07243	0.0694271	0.172122
26951	Zw10	zw10 kinetochore protein	0.429751	2.0712	0.0695635	0.172347
19043	Ppm1b	protein phosphatase 1B, magnesium dependent, beta isoform	0.252693	2.0709	0.0695962	0.17239
21454	Tcp1	t-complex protein 1	0.265343	2.07053	0.0696376	0.172455
69368	Wdfy1	WD repeat and FYVE domain containing 1	0.219026	2.07037	0.0696558	0.172462
104360	Isl2	insulin related protein 2 (islet 2)	0.0691678	2.07007	0.0696889	0.172506
68691	Kansl1l	KAT8 regulatory NSL complex subunit 1-like	0.195352	2.06722	0.0700062	0.173027
18575	Pde1c	phosphodiesterase 1C	0.0429889	2.06708	0.0700226	0.17303
19374	Rag2	recombination activating gene 2	0.0207548	2.06217	0.0705734	0.174314
67515	Ttc33	tetratricopeptide repeat domain 33	0.323765	2.06123	0.0706796	0.1745
15979	Ifngr1	interferon gamma receptor 1	0.33864	2.05363	0.0715411	0.176277
14825	Cxcl1	chemokine (C-X-C motif) ligand 1	0.192752	2.05331	0.0715786	0.176297
14977	Slc39a7	solute carrier family 39 (zinc transporter), member 7	0.26983	2.05293	0.0716211	0.176363
53625	B3gnt2	UDP-GlcNAc:betaGal beta-1,3-N-acetylglucosaminyltransferase 2	0.0278212	2.05218	0.0717069	0.176536
67487	Dhx40	DEAH (Asp-Glu-Ala-His) box polypeptide 40	0.29288	2.04795	0.072192	0.177614
231413	Grsf1	G-rich RNA sequence binding factor 1	0.211889	2.04725	0.0722731	0.177754
12931	Crlf1	cytokine receptor-like factor 1	0.0619442	2.04719	0.0722802	0.177754
56323	Dnajb5	DnaJ heat shock protein family (Hsp40) member B5	0.281071	2.04668	0.0723393	0.177822
80902	Zfp202	zinc finger protein 202	0.230222	2.04651	0.0723589	0.177831
110611	Hdlbp	high density lipoprotein (HDL) binding protein	0.250575	2.04633	0.0723787	0.177841
13480	Dpm1	dolichol-phosphate (beta-D) mannosyltransferase 1	0.182307	2.04608	0.0724076	0.177874
68777	Tmem53	transmembrane protein 53	0.298874	2.04256	0.0728161	0.178683
236193	Zfp709	zinc finger protein 709	0.176264	2.04241	0.0728324	0.178684
109978	Art4	ADP-ribosyltransferase 4	0.0510342	2.04204	0.0728755	0.178751
17966	Nbr1	NBR1, autophagy cargo receptor	0.339759	2.04131	0.0729607	0.178883
14187	Akr1b8	aldo-keto reductase family 1, member B8	0.236277	2.04005	0.0731074	0.179165
14085	Fah	fumarylacetoacetate hydrolase	0.390698	2.03833	0.0733086	0.179502
67770	Caap1	caspase activity and apoptosis inhibitor 1	0.07368	2.03507	0.0736901	0.180258
76294	Asb5	ankyrin repeat and SOCs box-containing 5	1.01865	2.03473	0.0737296	0.18026
18475	Pafah1b2	platelet-activating factor acetylhydrolase, isoform 1b, subunit 2	0.20901	2.03167	0.07409	0.180945
104318	Csnk1d	casein kinase 1, delta	0.203387	2.03078	0.0741948	0.181045
18301	Fxyd5	FXYD domain-containing ion transport regulator 5	0.194534	2.03024	0.0742591	0.181124
12738	Cldn2	claudin 2	0.0374755	2.02989	0.0743001	0.181127
21873	Tjp2	tight junction protein 2	0.289524	2.02982	0.0743094	0.181127
268390	Ahsa2	AHA1, activator of heat shock protein ATPase 2	0.26324	2.02885	0.0744241	0.181298
74150	Slc35f5	solute carrier family 35, member F5	0.283211	2.02875	0.0744358	0.181298
252870	Usp7	ubiquitin specific peptidase 7	0.214573	2.02869	0.0744428	0.181298
78394	Ddx52	DEAD (Asp-Glu-Ala-Asp) box polypeptide 52	0.310109	2.02765	0.0745666	0.18156
230935	Dnajc11	DnaJ heat shock protein family (Hsp40) member C11	0.247725	2.02457	0.074933	0.182256
67279	Med31	mediator complex subunit 31	0.28173	2.02266	0.0751608	0.182771
230654	Lrrc41	leucine rich repeat containing 41	0.330325	2.02012	0.0754662	0.183317
235439	Herc1	HECT and RLD domain containing E3 ubiquitin protein ligase family member 1	0.210447	2.01589	0.0759751	0.184395
56055	Gtpbp2	GTP binding protein 2	0.312378	2.01477	0.0761105	0.184565
20316	Sdf2	stromal cell derived factor 2	0.306445	2.01211	0.0764345	0.185163
15932	Idua	iduronidase, alpha-L	0.19934	2.01207	0.0764392	0.185163
21353	Tank	TRAF family member-associated Nf-kappa B activator	0.237482	2.01133	0.076529	0.185222
56310	Gps2	G protein pathway suppressor 2	0.244124	2.0101	0.0766782	0.185531
104110	Adcy4	adenylate cyclase 4	0.348669	2.0093	0.0767758	0.185581
22318	Vamp2	vesicle-associated membrane protein 2	0.186283	2.00609	0.0771695	0.186337
20355	Sema4f	sema domain, immunoglobulin domain (Ig), TM domain, and short cytoplasmic domain	0.0177134	2.00608	0.0771709	0.186337
12994	Csn3	casein kappa	0.0196144	2.00545	0.0772478	0.186443
93759	Sirt1	sirtuin 1	0.304367	2.00471	0.0773392	0.186586
319765	Igf2bp2	insulin-like growth factor 2 mRNA binding protein 2	0.10229	2.00444	0.0773728	0.186586
55950	Bri3	brain protein I3	0.283818	2.00084	0.0778161	0.187495
227290	Aamp	angio-associated migratory protein	0.223917	1.99991	0.0779313	0.187692
57752	Tacc2	transforming, acidic coiled-coil containing protein 2	0.791249	1.99892	0.0780545	0.187949
14525	Gcsam	germinal center associated, signaling and motility	0.0427888	1.99774	0.0782007	0.188221
170826	Ppargc1b	peroxisome proliferative activated receptor, gamma, coactivator 1 beta	0.373129	1.99722	0.0782659	0.188338
56194	Prpf40a	pre-mRNA processing factor 40A	0.210719	1.99604	0.0784129	0.188571
26405	Map3k2	mitogen-activated protein kinase kinase kinase 2	0.20005	1.99507	0.078534	0.188782
17087	Ly96	lymphocyte antigen 96	0.760202	1.99235	0.0788742	0.189505
108673	Ccdc86	coiled-coil domain containing 86	0.320365	1.99222	0.0788904	0.189505
320938	Tnpo3	transportin 3	0.208139	1.98961	0.0792178	0.189988
12224	Klf5	Kruppel-like factor 5	0.0680259	1.98959	0.0792207	0.189988
14275	Folr1	folate receptor 1 (adult)	0.0470677	1.98629	0.0796365	0.190662
14123	Fbrs	fibrosin	0.308567	1.98435	0.079882	0.191088
17975	Ncl	nucleolin	0.308538	1.98029	0.0803996	0.192083
56430	Clip1	CAP-GLY domain containing linker protein 1	0.303616	1.97817	0.0806708	0.192608
234728	Cmtr2	cap methyltransferase 2	0.230432	1.97476	0.0811086	0.19349
71707	Ubiad1	UbiA prenyltransferase domain containing 1	0.248234	1.9743	0.081168	0.193551
103098	Slc6a15	solute carrier family 6 (neurotransmitter transporter), member 15	0.0275088	1.97389	0.0812203	0.193635
76626	Msi2	musashi RNA-binding protein 2	0.224536	1.97276	0.0813665	0.193844
14004	Chchd2	coiled-coil-helix-coiled-coil-helix domain containing 2	0.244254	1.97032	0.0816818	0.194407
70717	Medag	mesenteric estrogen dependent adipogenesis	0.132741	1.96975	0.0817562	0.194502
19053	Ppp2cb	protein phosphatase 2 (formerly 2A), catalytic subunit, beta isoform	0.298321	1.96699	0.0821149	0.195232
72482	Acbd6	acyl-Coenzyme A binding domain containing 6	0.22607	1.95894	0.0831694	0.197366
12018	Bak1	BCL2-antagonist/killer 1	0.276448	1.95746	0.083365	0.197747
216578	Papolg	poly(A) polymerase gamma	0.164979	1.9555	0.0836248	0.19828
15200	Hbegf	heparin-binding EGF-like growth factor	0.15786	1.95448	0.0837599	0.198517
235072	2019-09-07	septin 7	0.145532	1.95152	0.0841536	0.199242
170744	Tlr8	toll-like receptor 8	0.255486	1.95019	0.0843312	0.199495
67834	Idh3a	isocitrate dehydrogenase 3 (NAD+) alpha	0.243142	1.94899	0.0844918	0.19975
30945	Rnf19a	ring finger protein 19A	0.178124	1.94687	0.0847761	0.200171
67452	Pnpla8	patatin-like phospholipase domain containing 8	0.274821	1.94672	0.0847963	0.200177
21928	Tnfaip2	tumor necrosis factor, alpha-induced protein 2	0.249004	1.94549	0.0849618	0.200526
80913	Pum2	pumilio RNA-binding family member 2	0.310556	1.94529	0.0849877	0.200545
26754	Cops5	COP9 signalosome subunit 5	0.303488	1.9431	0.0852828	0.200966
217410	Trib2	tribbles pseudokinase 2	0.236012	1.93973	0.0857391	0.201855
65961	Utp3	UTP3 small subunit processome component	0.25506	1.93951	0.0857695	0.201884
57439	Tmem183a	transmembrane protein 183A	0.215139	1.93803	0.085971	0.202274
21366	Slc6a6	solute carrier family 6 (neurotransmitter transporter, taurine), member 6	0.372744	1.93735	0.0860639	0.202324
14391	Gabpb1	GA repeat binding protein, beta 1	0.203313	1.93661	0.0861636	0.202403
107939	Pom121	nuclear pore membrane protein 121	0.12903	1.93658	0.0861689	0.202403
13340	Slc29a2	solute carrier family 29 (nucleoside transporters), member 2	0.121717	1.93511	0.086369	0.202747
20964	Syn1	synapsin I	0.069022	1.93463	0.0864343	0.202858
56532	Ripk3	receptor-interacting serine-threonine kinase 3	0.158999	1.93391	0.0865333	0.203006
99738	Kcnc4	potassium voltage gated channel, Shaw-related subfamily, member 4	0.208859	1.92767	0.0873918	0.204808
65112	Pmepa1	prostate transmembrane protein, androgen induced 1	0.651357	1.92625	0.0875886	0.205151
213499	Fbxo42	F-box protein 42	0.179646	1.92622	0.0875928	0.205151
19671	Rce1	Ras converting CAAX endopeptidase 1	0.254099	1.92467	0.0878068	0.20561
66055	Sf3b6	splicing factor 3B, subunit 6	0.185442	1.92255	0.0881024	0.206217
13047	Cux1	cut-like homeobox 1	0.201656	1.92116	0.0882965	0.206543
226971	Plekhb2	pleckstrin homology domain containing, family B (evectins) member 2	0.193037	1.92005	0.0884516	0.206863
72350	Zc2hc1c	zinc finger, C2HC-type containing 1C	0.0834679	1.91659	0.0889355	0.207651
64435	Fcamr	Fc receptor, IgA, IgM, high affinity	0.0432756	1.91623	0.0889863	0.207684
107272	Psat1	phosphoserine aminotransferase 1	0.346743	1.91456	0.0892225	0.208063
14367	Fzd5	frizzled class receptor 5	0.0920767	1.91328	0.0894032	0.208441
64144	Mllt1	myeloid/lymphoid or mixed-lineage leukemia; translocated to, 1	0.174307	1.91091	0.0897385	0.209051
76055	Oga	O-GlcNAcase	0.265403	1.90548	0.0905102	0.210544
231050	Galnt11	polypeptide N-acetylgalactosaminyltransferase 11	0.233267	1.90542	0.0905194	0.210544
14343	Fut1	fucosyltransferase 1	0.0250909	1.90517	0.0905552	0.210544
320119	Rps6kc1	ribosomal protein S6 kinase polypeptide 1	0.220074	1.90295	0.0908728	0.211041
71900	Tmem106b	transmembrane protein 106B	0.170276	1.90277	0.0908991	0.211059
232341	Wnk1	WNK lysine deficient protein kinase 1	0.158528	1.90198	0.0910124	0.211192
106618	Wdr90	WD repeat domain 90	0.107591	1.90184	0.0910321	0.211195
69792	Med6	mediator complex subunit 6	0.362837	1.90005	0.0912904	0.211663
14155	Fem1b	feminization 1 homolog b (C. elegans)	0.157441	1.8993	0.0913973	0.211868
12069	Bex2	brain expressed X-linked 2	0.110566	1.89887	0.0914602	0.21197
11468	Actg2	actin, gamma 2, smooth muscle, enteric	0.187335	1.8957	0.0919186	0.212945
77038	Arfgap2	ADP-ribosylation factor GTPase activating protein 2	0.245048	1.89546	0.091954	0.212984
16978	Lrrfip1	leucine rich repeat (in FLII) interacting protein 1	0.23301	1.89503	0.092016	0.21304
321006	Dcaf1	DDB1 and CUL4 associated factor 1	0.179636	1.89402	0.092162	0.213291
53312	Nub1	negative regulator of ubiquitin-like proteins 1	0.158184	1.89219	0.0924296	0.213771
67387	Unc50	unc-50 homolog	0.308946	1.88854	0.0929626	0.21473
56784	Ralgapa1	Ral GTPase activating protein, alpha subunit 1	0.247805	1.8866	0.0932477	0.215187
68149	Otub2	OTU domain, ubiquitin aldehyde binding 2	0.26591	1.8856	0.0933937	0.215392
74525	Fam234b	family with sequence similarity 234, member B	0.182945	1.88541	0.0934229	0.215413
78783	Brpf1	bromodomain and PHD finger containing, 1	0.250623	1.88499	0.0934845	0.21547
66899	Fip1l1	FIP1 like 1 (S. cerevisiae)	0.160305	1.88457	0.0935455	0.215566
12873	Cpa3	carboxypeptidase A3, mast cell	0.221085	1.88354	0.0936981	0.215848
73712	Dmkn	dermokine	0.160722	1.88081	0.0941022	0.216673
66523	2810004N23Rik	RIKEN cDNA 2810004N23 gene	0.359858	1.87943	0.0943073	0.217056
11815	Apod	apolipoprotein D	0.40544	1.87804	0.0945129	0.217441
52705	Krr1	KRR1, small subunit (SSU) processome component, homolog (yeast)	0.21442	1.87532	0.0949193	0.218153
107767	Scamp1	secretory carrier membrane protein 1	0.19178	1.8752	0.094938	0.218153
14912	Nkx6-2	NK6 homeobox 2	0.0752203	1.87227	0.0953765	0.218983
56422	Hbs1l	Hbs1-like (S. cerevisiae)	0.226076	1.87151	0.0954906	0.219135
94280	Sfxn3	sideroflexin 3	0.171406	1.87087	0.0955864	0.219284
74551	Pck2	phosphoenolpyruvate carboxykinase 2 (mitochondrial)	0.249837	1.87029	0.0956746	0.219355
19153	Prx	periaxin	0.0950217	1.86779	0.0960509	0.220084
56348	Hsd17b12	hydroxysteroid (17-beta) dehydrogenase 12	0.224678	1.8673	0.0961249	0.220209
18198	Musk	muscle, skeletal, receptor tyrosine kinase	0.22539	1.86691	0.0961842	0.220249
22173	Tyr	tyrosinase	0.0452345	1.86614	0.0963011	0.220345
235441	Usp3	ubiquitin specific peptidase 3	0.184358	1.86286	0.0968	0.221263
14133	Fcna	ficolin A	0.470224	1.86217	0.0969041	0.221418
12121	Bicd1	BICD cargo adaptor 1	0.0360353	1.86111	0.0970665	0.221613
19725	Rfx2	regulatory factor X, 2 (influences HLA class II expression)	0.176924	1.861	0.0970824	0.221613
15275	Hk1	hexokinase 1	0.34303	1.85724	0.0976585	0.22255
60363	Cldn15	claudin 15	0.325152	1.85537	0.0979468	0.223072
17149	Magoh	mago homolog, exon junction complex core component	0.323968	1.85473	0.0980443	0.223205
243328	Slc29a4	solute carrier family 29 (nucleoside transporters), member 4	0.0621811	1.85222	0.0984328	0.223909
18983	Cnot7	CCR4-NOT transcription complex, subunit 7	0.169611	1.85038	0.0987166	0.224419
66617	Ntmt1	N-terminal Xaa-Pro-Lys N-methyltransferase 1	0.305621	1.8467	0.0992898	0.225383
78834	Zfp623	zinc finger protein 623	0.265244	1.84663	0.0993	0.225383
68431	Fbxl15	F-box and leucine-rich repeat protein 15	0.279009	1.84209	0.100012	0.226543
76688	Arfrp1	ADP-ribosylation factor related protein 1	0.172875	1.84141	0.100117	0.226737
59033	Slc4a8	solute carrier family 4 (anion exchanger), member 8	0.0852926	1.84014	0.100317	0.227099
26564	Ror2	receptor tyrosine kinase-like orphan receptor 2	0.0266088	1.83935	0.100441	0.227335
67465	Sf3a1	splicing factor 3a, subunit 1	0.155893	1.83829	0.100609	0.227624
18483	Palm	paralemmin	0.224671	1.83711	0.100796	0.227955
23948	Mmp17	matrix metallopeptidase 17	0.0727171	1.83693	0.100824	0.227973
243905	Zfp568	zinc finger protein 568	0.121744	1.83572	0.101016	0.228316
219149	Xkr6	X-linked Kx blood group related 6	0.151952	1.83141	0.101701	0.22968
52708	Zfp410	zinc finger protein 410	0.304923	1.82698	0.102411	0.230915
68970	Dcaf12	DDB1 and CUL4 associated factor 12	0.256251	1.82591	0.102583	0.231256
73192	Xpot	exportin, tRNA (nuclear export receptor for tRNAs)	0.19191	1.82422	0.102855	0.231777
20300	Ccl25	chemokine (C-C motif) ligand 25	0.146221	1.8232	0.103019	0.232054
59026	Huwe1	HECT, UBA and WWE domain containing 1	0.208548	1.82133	0.103322	0.232591
71902	Cand1	cullin associated and neddylation disassociated 1	0.187234	1.8169	0.10404	0.233982
72293	Nkd2	naked cuticle 2	0.0957377	1.81589	0.104205	0.234259
232441	Rerg	RAS-like, estrogen-regulated, growth-inhibitor	0.038823	1.81459	0.104418	0.234598
11477	Acvr1	activin A receptor, type 1	0.180983	1.81405	0.104506	0.234749
28169	Agpat3	1-acylglycerol-3-phosphate O-acyltransferase 3	0.200006	1.81326	0.104635	0.234993
213956	Fam83f	family with sequence similarity 83, member F	0.0574344	1.81233	0.104789	0.235244
14282	Fosb	FBJ osteosarcoma oncogene B	0.137008	1.81198	0.104846	0.235297
63873	Trpv4	transient receptor potential cation channel, subfamily V, member 4	0.124299	1.81181	0.104874	0.235297
16177	Il1r1	interleukin 1 receptor, type I	0.292211	1.80969	0.105222	0.235816
68135	Eif3h	eukaryotic translation initiation factor 3, subunit H	0.217167	1.80918	0.105306	0.235937
67472	Mtfr1	mitochondrial fission regulator 1	0.249559	1.80843	0.105429	0.236073
105239	Rnf44	ring finger protein 44	0.194576	1.80835	0.105443	0.236073
19247	Ptpn11	protein tyrosine phosphatase, non-receptor type 11	0.247303	1.80799	0.105503	0.236073
22022	Tpst2	protein-tyrosine sulfotransferase 2	0.236527	1.80653	0.105743	0.236401
11308	Abi1	abl-interactor 1	0.238044	1.80568	0.105884	0.236622
18143	Npas2	neuronal PAS domain protein 2	0.0539105	1.80394	0.106172	0.237127
66266	Eapp	E2F-associated phosphoprotein	0.199765	1.80368	0.106216	0.237177
57743	Sec61a2	Sec61, alpha subunit 2 (S. cerevisiae)	0.23642	1.80296	0.106336	0.237303
51792	Ppp2r1a	protein phosphatase 2, regulatory subunit A, alpha	0.198821	1.80273	0.106374	0.237303
67843	Slc35a4	solute carrier family 35, member A4	0.276548	1.80271	0.106377	0.237303
16197	Il7r	interleukin 7 receptor	0.0741899	1.80189	0.106514	0.237546
59020	Pdzk1	PDZ domain containing 1	0.0351155	1.8018	0.106528	0.237546
215193	Utp25	UTP25 small subunit processome component	0.0992593	1.80043	0.106757	0.237962
230249	Ecpas	Ecm29 proteasome adaptor and scaffold	0.202024	1.80005	0.106822	0.238013
77305	Wdr82	WD repeat domain containing 82	0.16846	1.79952	0.106909	0.238161
56697	Akap10	A kinase (PRKA) anchor protein 10	0.237715	1.79915	0.106971	0.238207
22632	Yy1	YY1 transcription factor	0.228186	1.79824	0.107124	0.23832
54614	Prpf40b	pre-mRNA processing factor 40B	0.21666	1.79741	0.107263	0.238526
17876	Myef2	myelin basic protein expression factor 2, repressor	0.165707	1.79638	0.107435	0.238767
226169	Pprc1	peroxisome proliferative activated receptor, gamma, coactivator-related 1	0.106405	1.79622	0.107462	0.238781
67797	Snrnp48	small nuclear ribonucleoprotein 48 (U11/U12)	0.256383	1.79553	0.107579	0.238947
28036	Larp7	La ribonucleoprotein domain family, member 7	0.23948	1.79343	0.107933	0.239544
12569	Cdk5r1	cyclin-dependent kinase 5, regulatory subunit 1 (p35)	0.097099	1.79148	0.108261	0.240226
11767	Ap1m1	adaptor-related protein complex AP-1, mu subunit 1	0.244786	1.79111	0.108323	0.240316
17474	Clec4d	C-type lectin domain family 4, member d	0.142795	1.79004	0.108505	0.240578
225884	Gstp3	glutathione S-transferase pi 3	0.188584	1.78862	0.108746	0.241067
12164	Bmp8b	bone morphogenetic protein 8b	0.0588881	1.78839	0.108785	0.241105
15273	Hivep2	human immunodeficiency virus type I enhancer binding protein 2	0.161585	1.78678	0.109059	0.241571
20218	Khdrbs1	KH domain containing, RNA binding, signal transduction associated 1	0.156888	1.786	0.109191	0.241768
53861	Zranb2	zinc finger, RAN-binding domain containing 2	0.166975	1.78458	0.109433	0.242257
544963	Iqgap2	IQ motif containing GTPase activating protein 2	0.149292	1.78392	0.109546	0.242404
21390	Tbxa2r	thromboxane A2 receptor	0.0639461	1.78342	0.109633	0.242404
66151	Prr13	proline rich 13	0.216493	1.78332	0.109649	0.242404
67943	Mesd	mesoderm development LRP chaperone	0.236222	1.78224	0.109834	0.242716
67039	Rbm25	RNA binding motif protein 25	0.152	1.78157	0.10995	0.2429
20658	Son	Son DNA binding protein	0.264457	1.78025	0.110177	0.243236
15896	Icam2	intercellular adhesion molecule 2	0.369582	1.77832	0.110508	0.243798
246048	Chodl	chondrolectin	0.0468497	1.77714	0.110711	0.244083
223870	Senp1	SUMO1/sentrin specific peptidase 1	0.133671	1.77551	0.110994	0.24461
103551	Epop	elongin BC and polycomb repressive complex 2 associated protein	0.0690444	1.77493	0.111093	0.244782
18706	Pik3ca	phosphatidylinositol-4,5-bisphosphate 3-kinase catalytic subunit alpha	0.167624	1.77331	0.111375	0.245308
232333	Slc6a1	solute carrier family 6 (neurotransmitter transporter, GABA), member 1	0.0233369	1.77297	0.111434	0.245341
51796	Srrm1	serine/arginine repetitive matrix 1	0.127164	1.77278	0.111467	0.245365
53356	Eif3g	eukaryotic translation initiation factor 3, subunit G	0.281179	1.77205	0.111593	0.245459
230789	Fam76a	family with sequence similarity 76, member A	0.142682	1.77204	0.111596	0.245459
67887	Saraf	store-operated calcium entry-associated regulatory factor	0.237779	1.77105	0.111768	0.245742
100504663	Atg14	autophagy related 14	0.281633	1.77053	0.111859	0.245895
22110	Tspyl1	testis-specific protein, Y-encoded-like 1	0.201961	1.7704	0.111882	0.245897
68837	Foxk2	forkhead box K2	0.202878	1.77011	0.111932	0.245923
213417	Klhdc8a	kelch domain containing 8A	0.0192757	1.76995	0.111959	0.245923
14081	Acsl1	acyl-CoA synthetase long-chain family member 1	0.197429	1.76926	0.112081	0.246046
30806	Adamts8	a disintegrin-like and metallopeptidase (reprolysin type) with thrombospondin type 1 motif, 8	0.0205044	1.76856	0.112203	0.246231
56622	Adam21	a disintegrin and metallopeptidase domain 21	0.0793285	1.76708	0.112461	0.24669
224742	Abcf1	ATP-binding cassette, sub-family F (GCN20), member 1	0.175493	1.76673	0.112524	0.246747
18226	Nup62	nucleoporin 62	0.263051	1.76605	0.112643	0.246898
14783	Grb10	growth factor receptor bound protein 10	0.21273	1.76495	0.112836	0.247177
224585	Zfp160	zinc finger protein 160	0.164204	1.76363	0.113069	0.247591
15163	Hcls1	hematopoietic cell specific Lyn substrate 1	0.254423	1.76327	0.113131	0.247631
11512	Adcy6	adenylate cyclase 6	0.214796	1.76315	0.113153	0.247632
381845	Rnf225	ring finger protein 225	0.0573048	1.76191	0.113371	0.248013
29867	Cabp1	calcium binding protein 1	0.0924657	1.76119	0.113498	0.248164
16431	Itm2a	integral membrane protein 2A	0.362629	1.76006	0.113698	0.248536
69072	Ebna1bp2	EBNA1 binding protein 2	0.20857	1.75555	0.1145	0.249998
Note. The table was sorted by t-value in ascending order. Fold change (log) and t-value were round off to three decimal digits.
