# Supplementary material for: Mitochondrial pyruvate carrier is required for optimal brown fat thermogenesis
Source: eLife journal article supplement (doi:10.7554/elife.52558), 2020-08-14
Supplement: supp [file elife-52558-supp-v1.zip › elife_poa_e52558_Supplementary_file_2.xlsx]

## Sheet: SuppleTable2_DwInCR_q0.25_3273g
Supplementary File 2. List of 3,273 genes down-regulated in response to the cold.
GeneID	Symbol	Description	Foldchange (log)	t-value	p-value	FDR q-value
68041	Mid1ip1	Mid1 interacting protein 1 (gastrulation specific G12-like (zebrafish))	-2.66634	-24.4075	2.90561e-09	4.1078e-06
217082	Hlf	hepatic leukemia factor	-1.30167	-23.8016	3.59895e-09	4.13411e-06
17685	Msh2	mutS homolog 2	-1.14633	-22.6985	5.38824e-09	4.68777e-06
12580	Cdkn2c	cyclin dependent kinase inhibitor 2C	-1.7379	-20.8421	1.11163e-08	7.85786e-06
94045	P2rx5	purinergic receptor P2X, ligand-gated ion channel, 5	-2.58049	-18.8734	2.57337e-08	1.45809e-05
72787	Ndc1	NDC1 transmembrane nucleoporin	-1.65494	-18.869	2.5784e-08	1.45809e-05
18628	Per3	period circadian clock 3	-2.0037	-18.3783	3.2204e-08	1.65558e-05
70355	Gprc5c	G protein-coupled receptor, family C, group 5, member C	-1.03298	-17.5476	4.75478e-08	2.08442e-05
20787	Srebf1	sterol regulatory element binding transcription factor 1	-3.01251	-17.4254	5.04253e-08	2.11226e-05
12571	Cdk6	cyclin-dependent kinase 6	-1.28062	-17.2183	5.57606e-08	2.25233e-05
20443	St3gal4	ST3 beta-galactoside alpha-2,3-sialyltransferase 4	-1.61791	-16.8639	6.64077e-08	2.3505e-05
16543	Mdfic	MyoD family inhibitor domain containing	-0.872863	-16.8138	6.80851e-08	2.3505e-05
69606	Mtfmt	mitochondrial methionyl-tRNA formyltransferase	-0.652917	-16.3307	8.69518e-08	2.51815e-05
13822	Epb41l2	erythrocyte membrane protein band 4.1 like 2	-1.92194	-16.0942	9.82577e-08	2.51815e-05
277010	Marveld1	MARVEL (membrane-associating) domain containing 1	-1.70627	-16.0568	1.00192e-07	2.51815e-05
66943	Pqlc1	PQ loop repeat containing 1	-0.531126	-15.9263	1.07273e-07	2.58521e-05
208795	Tmem63a	transmembrane protein 63a	-0.427249	-15.6179	1.26339e-07	2.67453e-05
16369	Irs3	insulin receptor substrate 3	-2.00322	-15.556	1.30607e-07	2.67453e-05
19009	Pou6f1	POU domain, class 6, transcription factor 1	-0.660323	-15.5426	1.31549e-07	2.67453e-05
71774	Shroom1	shroom family member 1	-0.665392	-15.3027	1.49801e-07	2.72686e-05
268739	Arhgef40	Rho guanine nucleotide exchange factor (GEF) 40	-0.927784	-15.295	1.50432e-07	2.72686e-05
70784	Rasl12	RAS-like, family 12	-2.80917	-15.1589	1.62088e-07	2.73615e-05
74246	Gale	galactose-4-epimerase, UDP	-1.35055	-14.4942	2.35501e-07	3.6513e-05
21835	Thrsp	thyroid hormone responsive	-3.16661	-14.4425	2.42613e-07	3.70804e-05
226422	Rab29	RAB29, member RAS oncogene family	-1.36888	-14.3727	2.52589e-07	3.80904e-05
217198	Plekhh3	pleckstrin homology domain containing, family H (with MyTH4 domain) member 3	-1.6187	-14.1778	2.82928e-07	4.15947e-05
71706	Slc46a3	solute carrier family 46, member 3	-1.14964	-14.1763	2.83182e-07	4.15947e-05
69710	Arap1	ArfGAP with RhoGAP domain, ankyrin repeat and PH domain 1	-1.01006	-13.8924	3.34957e-07	4.677e-05
71683	Gypc	glycophorin C	-1.93502	-13.7731	3.59766e-07	4.90235e-05
19250	Ptpn14	protein tyrosine phosphatase, non-receptor type 14	-1.08358	-13.6009	3.99285e-07	5.25107e-05
22779	Ikzf2	IKAROS family zinc finger 2	-0.913103	-13.54	4.14416e-07	5.37329e-05
22418	Wnt5a	wingless-type MMTV integration site family, member 5A	-0.951533	-13.5071	4.22832e-07	5.37329e-05
18844	Plxna1	plexin A1	-0.998239	-13.4181	4.4659e-07	5.61215e-05
56405	Dusp14	dual specificity phosphatase 14	-1.37936	-13.396	4.52735e-07	5.62685e-05
60533	Cd274	CD274 antigen	-1.7431	-13.1695	5.21223e-07	6.14834e-05
235293	Sc5d	sterol-C5-desaturase	-1.37555	-13.1643	5.22922e-07	6.14834e-05
67486	Polr3g	polymerase (RNA) III (DNA directed) polypeptide G	-1.41928	-13.1335	5.33146e-07	6.15294e-05
78894	Aacs	acetoacetyl-CoA synthetase	-2.5686	-13.0531	5.60853e-07	6.28044e-05
73910	Arhgap18	Rho GTPase activating protein 18	-0.981344	-12.8841	6.24504e-07	6.79148e-05
17118	Marcks	myristoylated alanine rich protein kinase C substrate	-1.17781	-12.8231	6.49407e-07	6.89463e-05
11600	Angpt1	angiopoietin 1	-2.00504	-12.6356	7.33093e-07	7.08657e-05
71904	Paqr7	progestin and adipoQ receptor family member VII	-0.739608	-12.6204	7.40427e-07	7.0968e-05
16651	Sspn	sarcospan	-1.53961	-12.5872	7.56627e-07	7.16631e-05
232339	Ankrd26	ankyrin repeat domain 26	-0.486278	-12.5797	7.60351e-07	7.16631e-05
231123	Haus3	HAUS augmin-like complex, subunit 3	-1.12387	-12.5383	7.81212e-07	7.30208e-05
72475	Ssbp3	single-stranded DNA binding protein 3	-0.771532	-12.5135	7.94029e-07	7.36104e-05
14366	Fzd4	frizzled class receptor 4	-0.829824	-12.4812	8.11071e-07	7.4579e-05
65116	Prrg2	proline-rich Gla (G-carboxyglutamic acid) polypeptide 2	-0.874234	-12.464	8.20336e-07	7.48013e-05
53618	Fut8	fucosyltransferase 8	-1.20064	-12.4523	8.26717e-07	7.48013e-05
71670	Acy3	aspartoacylase (aminoacylase) 3	-0.953336	-12.3779	8.68396e-07	7.79489e-05
15902	Id2	inhibitor of DNA binding 2	-1.70818	-12.2982	9.15672e-07	7.99192e-05
319942	A530016L24Rik	RIKEN cDNA A530016L24 gene	-3.2424	-12.2846	9.24033e-07	7.99192e-05
66902	Mtap	methylthioadenosine phosphorylase	-1.04751	-12.252	9.44406e-07	8.09184e-05
18709	Pik3r2	phosphoinositide-3-kinase regulatory subunit 2	-0.861071	-12.2192	9.65364e-07	8.20922e-05
30878	Apln	apelin	-1.44949	-12.203	9.75921e-07	8.23706e-05
329828	Myorg	myogenesis regulating glycosidase (putative)	-1.54207	-12.13	1.02518e-06	8.40203e-05
94187	Zfp423	zinc finger protein 423	-0.582632	-12.03	1.09709e-06	8.86289e-05
12369	Casp7	caspase 7	-0.844826	-12.0054	1.11562e-06	8.94869e-05
66510	Rnf181	ring finger protein 181	-1.15179	-11.9936	1.12463e-06	8.95747e-05
14345	Fut4	fucosyltransferase 4	-0.50886	-11.8416	1.24829e-06	9.6042e-05
121021	Cspg4	chondroitin sulfate proteoglycan 4	-1.69593	-11.8191	1.26783e-06	9.61465e-05
24136	Zeb2	zinc finger E-box binding homeobox 2	-1.13436	-11.8124	1.27378e-06	9.61465e-05
224823	Rrp36	ribosomal RNA processing 36 homolog (S. cerevisiae)	-0.392838	-11.8108	1.27515e-06	9.61465e-05
23971	Papss1	3'-phosphoadenosine 5'-phosphosulfate synthase 1	-0.927177	-11.7199	1.35824e-06	0.000101733
217119	Xylt2	xylosyltransferase II	-0.862895	-11.6151	1.46154e-06	0.000107338
23796	Aplnr	apelin receptor	-1.62252	-11.567	1.51181e-06	0.000109606
83946	Phip	pleckstrin homology domain interacting protein	-0.798843	-11.4507	1.64158e-06	0.000117508
64933	Ap3m2	adaptor-related protein complex 3, mu 2 subunit	-0.808943	-11.4135	1.68568e-06	0.000119906
13610	S1pr3	sphingosine-1-phosphate receptor 3	-0.744442	-11.2832	1.85081e-06	0.000127638
15446	Hpgd	hydroxyprostaglandin dehydrogenase 15 (NAD)	-1.49997	-11.2652	1.87492e-06	0.000127661
67800	Dgat2	diacylglycerol O-acyltransferase 2	-2.2872	-11.2643	1.87615e-06	0.000127661
22673	Zfp185	zinc finger protein 185	-1.32695	-11.2578	1.885e-06	0.000127661
14886	Gtf2i	general transcription factor II I	-0.746384	-11.196	1.97124e-06	0.000131856
67759	Plgrkt	plasminogen receptor, C-terminal lysine transmembrane protein	-1.37363	-11.0877	2.13306e-06	0.000140261
20821	Trim21	tripartite motif-containing 21	-1.15647	-11.0368	2.21425e-06	0.000143926
64075	Smoc1	SPARC related modular calcium binding 1	-1.81723	-11.0206	2.24068e-06	0.00014441
67468	Mmd	monocyte to macrophage differentiation-associated	-1.33031	-10.9673	2.33062e-06	0.000148922
94226	S1pr5	sphingosine-1-phosphate receptor 5	-0.725089	-10.9478	2.36444e-06	0.000150235
109674	Ampd2	adenosine monophosphate deaminase 2	-1.53663	-10.9075	2.43613e-06	0.000152224
99011	Pomt1	protein-O-mannosyltransferase 1	-1.10832	-10.7783	2.6827e-06	0.000162556
60344	Fign	fidgetin	-0.406003	-10.7191	2.80491e-06	0.000165659
53860	2019-09-09	septin 9	-1.35587	-10.7102	2.82373e-06	0.000165659
70296	Tbc1d13	TBC1 domain family, member 13	-0.857336	-10.7024	2.84052e-06	0.000165659
20981	Syt3	synaptotagmin III	-0.677523	-10.7019	2.84155e-06	0.000165659
18797	Plcb3	phospholipase C, beta 3	-1.02593	-10.6685	2.91419e-06	0.000168161
77605	H2afv	H2A histone family, member V	-0.855712	-10.6391	2.97978e-06	0.000170208
17772	Mtm1	X-linked myotubular myopathy gene 1	-0.891014	-10.6146	3.03581e-06	0.000171824
68121	Cep70	centrosomal protein 70	-0.822479	-10.6025	3.06397e-06	0.000171824
13559	E2f5	E2F transcription factor 5	-0.58002	-10.5885	3.09671e-06	0.000171824
13982	Esr1	estrogen receptor 1 (alpha)	-1.22604	-10.5759	3.12668e-06	0.000171824
15401	Hoxa4	homeobox A4	-0.92909	-10.5725	3.1348e-06	0.000171824
11539	Adora1	adenosine A1 receptor	-1.37006	-10.5703	3.14003e-06	0.000171824
108902	B4gat1	beta-1,4-glucuronyltransferase 1	-0.884111	-10.5644	3.15409e-06	0.000171824
58804	Cdc42ep5	CDC42 effector protein (Rho GTPase binding) 5	-0.857614	-10.562	3.15998e-06	0.000171824
67870	Enoph1	enolase-phosphatase 1	-0.885843	-10.551	3.18674e-06	0.000172061
20514	Slc1a5	solute carrier family 1 (neutral amino acid transporter), member 5	-2.11228	-10.5345	3.22712e-06	0.00017298
14388	Gab1	growth factor receptor bound protein 2-associated protein 1	-0.99713	-10.4072	3.55921e-06	0.000183681
69719	Cad	carbamoyl-phosphate synthetase 2, aspartate transcarbamylase, and dihydroorotase	-1.13401	-10.4072	3.55925e-06	0.000183681
16145	Igtp	interferon gamma induced GTPase	-1.75396	-10.4065	3.56128e-06	0.000183681
30949	Lcmt1	leucine carboxyl methyltransferase 1	-1.15636	-10.3967	3.58828e-06	0.000183681
67155	Smarca2	SWI/SNF related, matrix associated, actin dependent regulator of chromatin, subfamily a, member 2	-1.1403	-10.3918	3.60183e-06	0.000183681
232560	Caprin2	caprin family member 2	-0.36107	-10.379	3.63789e-06	0.000183681
17536	Meis2	Meis homeobox 2	-0.546948	-10.3266	3.78899e-06	0.00019046
22325	Vav2	vav 2 oncogene	-0.904855	-10.2565	4.00236e-06	0.000197423
214137	Arhgap29	Rho GTPase activating protein 29	-0.854652	-10.2548	4.00763e-06	0.000197423
27280	Phlda3	pleckstrin homology like domain, family A, member 3	-1.84937	-10.2525	4.01479e-06	0.000197423
66401	Nudt2	nudix (nucleoside diphosphate linked moiety X)-type motif 2	-0.740245	-10.2363	4.06626e-06	0.000198604
19360	Rad50	RAD50 double strand break repair protein	-0.599045	-10.2339	4.07393e-06	0.000198604
107975	Pacs1	phosphofurin acidic cluster sorting protein 1	-0.523735	-10.2191	4.12158e-06	0.000199693
208967	Thnsl1	threonine synthase-like 1 (bacterial)	-0.888264	-10.2153	4.13382e-06	0.000199693
228019	Mettl8	methyltransferase like 8	-0.513896	-10.1744	4.26908e-06	0.000202257
17470	Cd200	CD200 antigen	-1.46702	-10.1729	4.27404e-06	0.000202257
93686	Rbfox2	RNA binding protein, fox-1 homolog (C. elegans) 2	-1.29099	-10.1651	4.30049e-06	0.000202661
233549	Mogat2	monoacylglycerol O-acyltransferase 2	-0.499061	-10.1083	4.49834e-06	0.000210232
19340	Rab3d	RAB3D, member RAS oncogene family	-1.11976	-10.0947	4.54692e-06	0.000210761
100637	N4bp2l1	NEDD4 binding protein 2-like 1	-1.30017	-10.0715	4.6317e-06	0.00021339
12606	Cebpa	CCAAT/enhancer binding protein (C/EBP), alpha	-2.40655	-10.0688	4.64151e-06	0.00021339
246738	Dnajc28	DnaJ heat shock protein family (Hsp40) member C28	-1.58066	-10.0638	4.66024e-06	0.00021339
74198	Dtx2	deltex 2, E3 ubiquitin ligase	-0.672622	-10.0487	4.71667e-06	0.000215103
56693	Crtap	cartilage associated protein	-1.02653	-10.0194	4.82797e-06	0.000217547
68910	Zfp467	zinc finger protein 467	-1.17663	-10.0053	4.88298e-06	0.000219153
83669	Wdr6	WD repeat domain 6	-1.37266	-9.98693	4.95526e-06	0.000220646
50883	Chek2	checkpoint kinase 2	-0.529338	-9.98181	4.97566e-06	0.000220685
26360	Angptl2	angiopoietin-like 2	-1.52804	-9.95831	5.07039e-06	0.000224008
50773	Nt5c	5',3'-nucleotidase, cytosolic	-0.548134	-9.95043	5.10262e-06	0.000224555
16328	Cep250	centrosomal protein 250	-0.485341	-9.9293	5.19014e-06	0.000226643
72421	Ttc30b	tetratricopeptide repeat domain 30B	-0.846986	-9.83984	5.5795e-06	0.000237234
11522	Adh1	alcohol dehydrogenase 1 (class I)	-0.98941	-9.81465	5.69488e-06	0.000241232
54343	Atf7ip	activating transcription factor 7 interacting protein	-0.527052	-9.74722	6.01698e-06	0.000251114
14218	Sh3pxd2a	SH3 and PX domains 2A	-1.39764	-9.72211	6.14202e-06	0.000253533
319953	Ttll1	tubulin tyrosine ligase-like 1	-0.44107	-9.72208	6.14217e-06	0.000253533
235584	Dusp7	dual specificity phosphatase 7	-1.14957	-9.69801	6.26474e-06	0.000256718
14958	H1f0	H1 histone family, member 0	-1.04788	-9.66918	6.41514e-06	0.000261827
11428	Aco1	aconitase 1	-1.28716	-9.66094	6.45886e-06	0.000261827
209224	Enox2	ecto-NOX disulfide-thiol exchanger 2	-0.568854	-9.64128	6.56451e-06	0.000264634
22035	Tnfsf10	tumor necrosis factor (ligand) superfamily, member 10	-1.08708	-9.61221	6.7242e-06	0.000269683
20519	Slc22a3	solute carrier family 22 (organic cation transporter), member 3	-1.61699	-9.59295	6.83238e-06	0.000272755
66193	Pithd1	PITH (C-terminal proteasome-interacting domain of thioredoxin-like) domain containing 1	-0.858993	-9.59002	6.84902e-06	0.000272755
23966	Tenm4	teneurin transmembrane protein 4	-0.744997	-9.55895	7.02816e-06	0.000276963
20850	Stat5a	signal transducer and activator of transcription 5A	-1.31726	-9.50663	7.34156e-06	0.000287312
19679	Pitpnm2	phosphatidylinositol transfer protein, membrane-associated 2	-0.5413	-9.41253	7.9449e-06	0.000306805
29807	Tpk1	thiamine pyrophosphokinase	-0.494816	-9.35942	8.30945e-06	0.000314314
74114	Crot	carnitine O-octanoyltransferase	-1.45564	-9.32146	8.58137e-06	0.000320314
18028	Nfib	nuclear factor I/B	-0.907329	-9.30428	8.70771e-06	0.000323961
83925	Trps1	transcriptional repressor GATA binding 1	-0.933451	-9.24641	9.14842e-06	0.00033439
13829	Dmtn	dematin actin binding protein	-1.00871	-9.2108	9.43186e-06	0.000340812
68303	Fam114a1	family with sequence similarity 114, member A1	-0.711156	-9.19066	9.59645e-06	0.000343481
12190	Brca2	breast cancer 2, early onset	-0.401135	-9.18168	9.67087e-06	0.000343955
56441	Naa80	N(alpha)-acetyltransferase 80, NatH catalytic subunit	-1.24523	-9.17111	9.75931e-06	0.000346012
80884	Maged2	melanoma antigen, family D, 2	-0.670491	-9.15683	9.88014e-06	0.000348113
70110	Ifi35	interferon-induced protein 35	-0.840479	-9.14232	1.00047e-05	0.000351408
68659	Gask1b	golgi associated kinase 1B	-0.593743	-9.04619	1.08747e-05	0.000374977
12499	Entpd5	ectonucleoside triphosphate diphosphohydrolase 5	-0.828492	-9.03798	1.09528e-05	0.000376522
13170	Dbp	D site albumin promoter binding protein	-1.48641	-9.01287	1.11954e-05	0.000381386
66083	Setd6	SET domain containing 6	-0.537056	-8.97673	1.15553e-05	0.000391289
19712	Rest	RE1-silencing transcription factor	-0.417902	-8.96805	1.16436e-05	0.000393102
13593	Ebf3	early B cell factor 3	-1.17978	-8.94478	1.1884e-05	0.00039595
104175	Sbk1	SH3-binding kinase 1	-2.08427	-8.87673	1.26193e-05	0.00041429
11933	Atp1b3	ATPase, Na+/K+ transporting, beta 3 polypeptide	-0.611046	-8.87315	1.26594e-05	0.00041429
66420	Polr2e	polymerase (RNA) II (DNA directed) polypeptide E	-0.812483	-8.86954	1.26998e-05	0.00041429
329650	Med12l	mediator complex subunit 12-like	-0.90709	-8.86857	1.27108e-05	0.00041429
216846	Cntrob	centrobin, centrosomal BRCA2 interacting protein	-0.309158	-8.85032	1.29181e-05	0.000417438
13592	Ebf2	early B cell factor 2	-1.03017	-8.84176	1.30166e-05	0.000419423
68861	Dipk2a	divergent protein kinase domain 2A	-1.00071	-8.83155	1.31351e-05	0.000420845
11652	Akt2	thymoma viral proto-oncogene 2	-1.01994	-8.82695	1.31889e-05	0.000421373
68526	Gpr155	G protein-coupled receptor 155	-0.701152	-8.80715	1.34233e-05	0.00042572
27355	Pald1	phosphatase domain containing, paladin 1	-1.21005	-8.8018	1.34874e-05	0.00042572
102032	Smim19	small integral membrane protein 19	-0.836253	-8.79967	1.35131e-05	0.00042572
57431	Dnajc4	DnaJ heat shock protein family (Hsp40) member C4	-0.496225	-8.78172	1.37313e-05	0.000430195
74257	Tspan17	tetraspanin 17	-0.609011	-8.74079	1.42432e-05	0.000442016
66881	Pcyox1	prenylcysteine oxidase 1	-1.22583	-8.73538	1.43124e-05	0.000442016
225994	Nmrk1	nicotinamide riboside kinase 1	-0.731983	-8.72223	1.44824e-05	0.000444566
223917	Krt79	keratin 79	-0.930605	-8.69875	1.47911e-05	0.000449698
58193	Extl2	exostoses (multiple)-like 2	-0.786462	-8.68106	1.50287e-05	0.000453906
79196	Osbpl5	oxysterol binding protein-like 5	-1.19545	-8.67894	1.50575e-05	0.000453906
142980	Tlr3	toll-like receptor 3	-0.726729	-8.67749	1.50771e-05	0.000453906
52055	Rab11fip5	RAB11 family interacting protein 5 (class I)	-0.730145	-8.67654	1.50901e-05	0.000453906
213948	Atg9b	autophagy related 9B	-1.04411	-8.66769	1.52111e-05	0.000456332
103844	Inca1	inhibitor of CDK, cyclin A1 interacting protein 1	-0.948961	-8.65746	1.53521e-05	0.000458131
69572	Mfsd3	major facilitator superfamily domain containing 3	-0.958643	-8.63358	1.56872e-05	0.000465016
16011	Igfbp5	insulin-like growth factor binding protein 5	-1.74796	-8.63225	1.57061e-05	0.000465016
80885	Hcar2	hydroxycarboxylic acid receptor 2	-1.07137	-8.60179	1.61459e-05	0.000475548
116939	Pnpla3	patatin-like phospholipase domain containing 3	-1.95664	-8.58693	1.63654e-05	0.000480055
20678	Sox5	SRY (sex determining region Y)-box 5	-0.474603	-8.58569	1.63839e-05	0.000480055
16449	Jag1	jagged 1	-0.922648	-8.58127	1.64499e-05	0.000480746
12091	Glb1	galactosidase, beta 1	-0.8149	-8.56031	1.67668e-05	0.000488744
58185	Rsad2	radical S-adenosyl methionine domain containing 2	-0.942448	-8.54561	1.69931e-05	0.000494068
23821	Bace1	beta-site APP cleaving enzyme 1	-0.700144	-8.53776	1.71154e-05	0.000495076
192156	Mvd	mevalonate (diphospho) decarboxylase	-1.21676	-8.53239	1.71996e-05	0.000496245
214424	Parp16	poly (ADP-ribose) polymerase family, member 16	-1.18373	-8.5227	1.73527e-05	0.00049846
20503	Slc16a7	solute carrier family 16 (monocarboxylic acid transporters), member 7	-1.07977	-8.52195	1.73646e-05	0.00049846
27029	Sgsh	N-sulfoglucosamine sulfohydrolase (sulfamidase)	-0.777692	-8.4945	1.78067e-05	0.000505231
17960	Nat1	N-acetyl transferase 1	-1.04722	-8.4941	1.78133e-05	0.000505231
14563	Gdf5	growth differentiation factor 5	-0.823215	-8.49346	1.78238e-05	0.000505231
20502	Slc16a2	solute carrier family 16 (monocarboxylic acid transporters), member 2	-0.608708	-8.48785	1.79158e-05	0.00050657
80987	Nckipsd	NCK interacting protein with SH3 domain	-0.558321	-8.47252	1.81698e-05	0.000512443
207565	Camkk2	calcium/calmodulin-dependent protein kinase kinase 2, beta	-1.06674	-8.46974	1.82163e-05	0.000512443
19286	Pts	6-pyruvoyl-tetrahydropterin synthase	-0.78191	-8.44315	1.86676e-05	0.000520027
30045	Dnajc12	DnaJ heat shock protein family (Hsp40) member C12	-0.58499	-8.43337	1.88369e-05	0.000521767
18708	Pik3r1	phosphoinositide-3-kinase regulatory subunit 1	-2.65158	-8.43028	1.88907e-05	0.000521767
76260	Ttc8	tetratricopeptide repeat domain 8	-0.90143	-8.42938	1.89064e-05	0.000521767
11637	Ak2	adenylate kinase 2	-0.935346	-8.42626	1.89608e-05	0.000521767
230257	Ptbp3	polypyrimidine tract binding protein 3	-0.31398	-8.40852	1.92741e-05	0.000524779
20358	Sema6a	sema domain, transmembrane domain (TM), and cytoplasmic domain, (semaphorin) 6A	-0.63514	-8.38502	1.96981e-05	0.000534257
224650	Anks1	ankyrin repeat and SAM domain containing 1	-0.989524	-8.3802	1.97864e-05	0.000535369
14302	Frk	fyn-related kinase	-0.452863	-8.37595	1.98645e-05	0.000536198
235050	Zfp810	zinc finger protein 810	-0.811411	-8.37031	1.99688e-05	0.000536613
17380	Mme	membrane metallo endopeptidase	-0.625794	-8.35632	2.02299e-05	0.000538563
18007	Neo1	neogenin	-0.773492	-8.34018	2.0536e-05	0.000543939
17281	Fyco1	FYVE and coiled-coil domain containing 1	-0.998685	-8.33493	2.06366e-05	0.000545328
16997	Ltbp2	latent transforming growth factor beta binding protein 2	-1.3806	-8.31868	2.09515e-05	0.000552357
232223	Txnrd3	thioredoxin reductase 3	-0.832905	-8.28609	2.15992e-05	0.000565478
17984	Ndn	necdin	-1.3455	-8.26729	2.19828e-05	0.000568595
16775	Lama4	laminin, alpha 4	-1.56259	-8.26535	2.2023e-05	0.000568595
16590	Kit	KIT proto-oncogene receptor tyrosine kinase	-1.75961	-8.26155	2.21016e-05	0.000568595
80285	Parp9	poly (ADP-ribose) polymerase family, member 9	-1.07998	-8.25047	2.23325e-05	0.000571449
66394	Nosip	nitric oxide synthase interacting protein	-0.570165	-8.18099	2.38433e-05	0.000601938
98952	Fam102a	family with sequence similarity 102, member A	-0.736803	-8.16733	2.41535e-05	0.00060841
16206	Lrig1	leucine-rich repeats and immunoglobulin-like domains 1	-1.25641	-8.15586	2.44173e-05	0.000612327
68178	Cgnl1	cingulin-like 1	-1.16848	-8.15288	2.44864e-05	0.000612701
320940	Atp11c	ATPase, class VI, type 11C	-0.505504	-8.12052	2.52502e-05	0.000626271
21354	Tap1	transporter 1, ATP-binding cassette, sub-family B (MDR/TAP)	-0.896261	-8.11251	2.54434e-05	0.000629683
69737	Ttl	tubulin tyrosine ligase	-0.821504	-8.09427	2.58894e-05	0.000636541
56292	Naa10	N(alpha)-acetyltransferase 10, NatA catalytic subunit	-0.425014	-8.05333	2.69218e-05	0.000656219
235041	Kank2	KN motif and ankyrin repeat domains 2	-1.32791	-8.04037	2.7258e-05	0.000662985
432486	Gnptab	N-acetylglucosamine-1-phosphate transferase, alpha and beta subunits	-1.22735	-8.01943	2.7811e-05	0.000674985
18129	Notch2	notch 2	-0.824324	-8.00785	2.81222e-05	0.000680626
58805	Mlxipl	MLX interacting protein-like	-1.16766	-8.00026	2.83283e-05	0.000683043
227612	Tor4a	torsin family 4, member A	-1.04796	-7.99382	2.85045e-05	0.000683043
17688	Msh6	mutS homolog 6	-0.811359	-7.9927	2.85351e-05	0.000683043
76816	Sdccag8	serologically defined colon cancer antigen 8	-0.720052	-7.99184	2.8559e-05	0.000683043
21813	Tgfbr2	transforming growth factor, beta receptor II	-1.45873	-7.99159	2.85658e-05	0.000683043
67980	Gnpda2	glucosamine-6-phosphate deaminase 2	-0.351953	-7.98785	2.86687e-05	0.000684058
26401	Map3k1	mitogen-activated protein kinase kinase kinase 1	-0.905385	-7.9855	2.87339e-05	0.00068417
56637	Gsk3b	glycogen synthase kinase 3 beta	-0.838462	-7.94664	2.98322e-05	0.000703067
66540	Fam107b	family with sequence similarity 107, member B	-1.15272	-7.94643	2.98384e-05	0.000703067
18441	P2ry1	purinergic receptor P2Y, G-protein coupled 1	-1.00336	-7.9277	3.03843e-05	0.000711815
67426	Coq8a	coenzyme Q8A	-1.67036	-7.92589	3.04376e-05	0.000711815
16000	Igf1	insulin-like growth factor 1	-1.37652	-7.91504	3.07595e-05	0.000715788
13855	Epn2	epsin 2	-1.03788	-7.91129	3.08719e-05	0.000715788
70082	Lysmd2	LysM, putative peptidoglycan-binding, domain containing 2	-0.728882	-7.91109	3.08778e-05	0.000715788
218865	Chdh	choline dehydrogenase	-1.56784	-7.88923	3.15406e-05	0.000726595
230162	Zfp189	zinc finger protein 189	-0.682982	-7.87626	3.19413e-05	0.000726595
52468	Ctdsp2	CTD (carboxy-terminal domain, RNA polymerase II, polypeptide A) small phosphatase 2	-0.744215	-7.8728	3.20493e-05	0.000726595
229473	Tmem131l	transmembrane 131 like	-1.07028	-7.87034	3.21262e-05	0.000726694
19651	Rbl2	RB transcriptional corepressor like 2	-0.635914	-7.86508	3.22914e-05	0.000728302
192193	Edem1	ER degradation enhancer, mannosidase alpha-like 1	-0.798193	-7.86258	3.23702e-05	0.000728302
213233	Tapbpl	TAP binding protein-like	-0.996757	-7.85252	3.26894e-05	0.000732928
14137	Fdft1	farnesyl diphosphate farnesyl transferase 1	-0.915408	-7.85138	3.27258e-05	0.000732928
66659	Acp6	acid phosphatase 6, lysophosphatidic	-0.971501	-7.82681	3.35214e-05	0.000749264
101502	Hsd3b7	hydroxy-delta-5-steroid dehydrogenase, 3 beta- and steroid delta-isomerase 7	-1.17856	-7.79489	3.45869e-05	0.000768523
108699	Chn1	chimerin 1	-1.36403	-7.7892	3.47807e-05	0.000771314
240753	Plekha6	pleckstrin homology domain containing, family A member 6	-0.424877	-7.77866	3.51432e-05	0.000773825
233079	Ffar2	free fatty acid receptor 2	-0.497836	-7.77209	3.53709e-05	0.00077528
16005	Igfals	insulin-like growth factor binding protein, acid labile subunit	-1.04243	-7.7601	3.57912e-05	0.000782975
73873	Fam161a	family with sequence similarity 161, member A	-0.527244	-7.7443	3.63531e-05	0.000790923
110460	Acat2	acetyl-Coenzyme A acetyltransferase 2	-0.971602	-7.74399	3.63643e-05	0.000790923
52563	Cdc23	CDC23 cell division cycle 23	-0.553806	-7.73978	3.65156e-05	0.000792689
100515	Zfp518b	zinc finger protein 518B	-0.505951	-7.73265	3.67737e-05	0.000795688
71712	Dram1	DNA-damage regulated autophagy modulator 1	-1.4924	-7.72313	3.71212e-05	0.000801224
54006	Deaf1	DEAF1, transcription factor	-0.653082	-7.71729	3.73365e-05	0.000804334
12497	Entpd6	ectonucleoside triphosphate diphosphohydrolase 6	-1.03732	-7.68683	3.84807e-05	0.000822715
21881	Tkt	transketolase	-1.12963	-7.67157	3.90686e-05	0.00083371
19090	Prkdc	protein kinase, DNA activated, catalytic polypeptide	-0.775687	-7.66358	3.93804e-05	0.000837673
70508	Bbx	bobby sox HMG box containing	-0.798761	-7.65413	3.97525e-05	0.000838519
170742	Sertad3	SERTA domain containing 3	-0.689592	-7.65313	3.97921e-05	0.000838519
232539	Klhl42	kelch-like 42	-1.07302	-7.62483	4.0931e-05	0.000854752
17760	Map6	microtubule-associated protein 6	-0.605478	-7.62472	4.09355e-05	0.000854752
15945	Cxcl10	chemokine (C-X-C motif) ligand 10	-0.660127	-7.62409	4.09616e-05	0.000854752
72307	2510002D24Rik	RIKEN cDNA 2510002D24 gene	-0.863286	-7.62217	4.104e-05	0.00085481
208943	Myo5c	myosin VC	-1.19217	-7.61413	4.13709e-05	0.00086012
74008	Arsg	arylsulfatase G	-0.303268	-7.60468	4.17642e-05	0.000865116
17025	Alad	aminolevulinate, delta-, dehydratase	-1.18954	-7.59346	4.22358e-05	0.000873284
230577	Pars2	prolyl-tRNA synthetase (mitochondrial)(putative)	-0.625552	-7.58353	4.26586e-05	0.000880417
18569	Pdcd4	programmed cell death 4	-1.07331	-7.56185	4.35972e-05	0.00089327
60534	Fancg	Fanconi anemia, complementation group G	-0.524528	-7.55629	4.38415e-05	0.000894154
217258	Abca8a	ATP-binding cassette, sub-family A (ABC1), member 8a	-1.09884	-7.55598	4.38553e-05	0.000894154
13631	Eef2k	eukaryotic elongation factor-2 kinase	-0.731802	-7.5358	4.47553e-05	0.000905207
66515	Cul7	cullin 7	-0.513563	-7.53169	4.4941e-05	0.000905698
68778	Gucd1	guanylyl cyclase domain containing 1	-1.08514	-7.53029	4.50046e-05	0.000905698
624219	Angptl8	angiopoietin-like 8	-1.59912	-7.51867	4.55354e-05	0.000912198
234407	Colgalt1	collagen beta(1-O)galactosyltransferase 1	-0.488385	-7.51793	4.55696e-05	0.000912198
100088	Rcc1	regulator of chromosome condensation 1	-0.427932	-7.50578	4.61324e-05	0.000921832
93694	Clec2d	C-type lectin domain family 2, member d	-0.920225	-7.50109	4.63515e-05	0.000922949
12579	Cdkn2b	cyclin dependent kinase inhibitor 2B	-0.734092	-7.49469	4.66528e-05	0.000926305
217716	Mlh3	mutL homolog 3	-0.693983	-7.49403	4.66838e-05	0.000926305
227695	Spout1	SPOUT domain containing methyltransferase 1	-0.3639	-7.49034	4.68587e-05	0.000928147
85308	Emc9	ER membrane protein complex subunit 9	-0.884041	-7.48665	4.70337e-05	0.000928488
236790	Ints6l	integrator complex subunit 6 like	-0.621553	-7.48214	4.72495e-05	0.000928582
11554	Adrb1	adrenergic receptor, beta 1	-0.963915	-7.47221	4.77272e-05	0.000933257
80892	Zfhx4	zinc finger homeodomain 4	-0.708308	-7.47119	4.77768e-05	0.000933257
66939	Aagab	alpha- and gamma-adaptin binding protein	-0.888023	-7.45051	4.87906e-05	0.000951417
68385	Tlcd1	TLC domain containing 1	-1.00787	-7.44646	4.89923e-05	0.000952067
108735	Sft2d2	SFT2 domain containing 2	-0.983201	-7.43525	4.9554e-05	0.000958045
231464	Cnot6l	CCR4-NOT transcription complex, subunit 6-like	-0.519545	-7.42781	4.99312e-05	0.000963689
109979	Art3	ADP-ribosyltransferase 3	-0.85912	-7.40967	5.08634e-05	0.000976812
21847	Klf10	Kruppel-like factor 10	-1.18951	-7.38401	5.22154e-05	0.000994538
16890	Lipe	lipase, hormone sensitive	-1.33017	-7.37566	5.26632e-05	0.000996034
12704	Cit	citron	-0.0974041	-7.37565	5.26639e-05	0.000996034
11545	Parp1	poly (ADP-ribose) polymerase family, member 1	-0.945978	-7.37386	5.27607e-05	0.0009962
19650	Rbl1	RB transcriptional corepressor like 1	-0.341864	-7.36985	5.29778e-05	0.000998632
56364	Zmym3	zinc finger, MYM-type 3	-0.813588	-7.33446	5.49385e-05	0.00102941
671535	Parp10	poly (ADP-ribose) polymerase family, member 10	-1.0315	-7.33382	5.49747e-05	0.00102941
70552	Lrrc56	leucine rich repeat containing 56	-0.493777	-7.32986	5.51995e-05	0.00103191
331026	Gmppb	GDP-mannose pyrophosphorylase B	-0.701365	-7.30617	5.65633e-05	0.0010488
16439	Itpr2	inositol 1,4,5-triphosphate receptor 2	-0.940389	-7.30611	5.65668e-05	0.0010488
104884	Tdp1	tyrosyl-DNA phosphodiesterase 1	-0.26475	-7.30397	5.66918e-05	0.0010494
94061	Mrpl1	mitochondrial ribosomal protein L1	-0.600488	-7.29899	5.69838e-05	0.00105136
12304	Pdia4	protein disulfide isomerase associated 4	-1.06134	-7.29525	5.72043e-05	0.00105371
231861	Tnrc18	trinucleotide repeat containing 18	-0.497362	-7.29254	5.73645e-05	0.00105495
108153	Adamts7	a disintegrin-like and metallopeptidase (reprolysin type) with thrombospondin type 1 motif, 7	-0.223707	-7.28061	5.80769e-05	0.00106631
13017	Ctbp2	C-terminal binding protein 2	-0.441835	-7.2761	5.8348e-05	0.00106783
68465	Adipor2	adiponectin receptor 2	-0.83156	-7.27199	5.8597e-05	0.00107065
217057	Ptrh2	peptidyl-tRNA hydrolase 2	-0.682388	-7.2681	5.88337e-05	0.00107324
93737	Pard6g	par-6 family cell polarity regulator gamma	-0.591848	-7.26178	5.92203e-05	0.00107855
12371	Casp9	caspase 9	-0.417573	-7.25825	5.94371e-05	0.00108035
83796	Smarcd2	SWI/SNF related, matrix associated, actin dependent regulator of chromatin, subfamily d, member 2	-0.885141	-7.25707	5.95098e-05	0.00108035
11515	Adcy9	adenylate cyclase 9	-0.911103	-7.23465	6.09114e-05	0.00110332
19730	Ralgds	ral guanine nucleotide dissociation stimulator	-0.401717	-7.23371	6.09706e-05	0.00110332
12777	Ccr10	chemokine (C-C motif) receptor 10	-1.04054	-7.20882	6.25708e-05	0.00112867
20475	Six5	sine oculis-related homeobox 5	-0.777231	-7.20028	6.31306e-05	0.00113605
19299	Abcd3	ATP-binding cassette, sub-family D (ALD), member 3	-0.828004	-7.19369	6.35662e-05	0.00113944
71778	Klhl5	kelch-like 5	-0.880933	-7.19361	6.35711e-05	0.00113944
67326	1700037H04Rik	RIKEN cDNA 1700037H04 gene	-1.01761	-7.18908	6.38729e-05	0.00114224
52588	Tspan14	tetraspanin 14	-1.25691	-7.18823	6.39292e-05	0.00114224
105670	Rcbtb2	regulator of chromosome condensation (RCC1) and BTB (POZ) domain containing protein 2	-0.829431	-7.17125	6.50741e-05	0.00115858
74653	Pomk	protein-O-mannose kinase	-0.490609	-7.16415	6.55595e-05	0.00115858
69263	Rfc3	replication factor C (activator 1) 3	-0.425352	-7.1522	6.63853e-05	0.00117132
72713	Angptl1	angiopoietin-like 1	-1.04672	-7.1454	6.68604e-05	0.00117275
219072	Haus4	HAUS augmin-like complex, subunit 4	-0.670322	-7.14382	6.6971e-05	0.00117275
14385	Slc37a4	solute carrier family 37 (glucose-6-phosphate transporter), member 4	-1.50448	-7.14363	6.69847e-05	0.00117275
94275	Maged1	melanoma antigen, family D, 1	-0.852808	-7.1419	6.71061e-05	0.00117306
55936	Ctps2	cytidine 5'-triphosphate synthase 2	-0.485942	-7.13893	6.73155e-05	0.00117333
12419	Cbx5	chromobox 5	-0.897042	-7.13874	6.73293e-05	0.00117333
107435	Hat1	histone aminotransferase 1	-0.525738	-7.13541	6.75648e-05	0.00117563
69274	Ctdspl	CTD (carboxy-terminal domain, RNA polymerase II, polypeptide A) small phosphatase-like	-0.732246	-7.12365	6.84053e-05	0.0011866
234309	Cbr4	carbonyl reductase 4	-0.588198	-7.12193	6.85285e-05	0.00118692
69091	Vps26b	VPS26 retromer complex component B	-0.633233	-7.11943	6.87089e-05	0.00118822
20512	Slc1a3	solute carrier family 1 (glial high affinity glutamate transporter), member 3	-1.12736	-7.10906	6.94633e-05	0.00119943
213603	Slc44a3	solute carrier family 44, member 3	-0.9321	-7.10478	6.97768e-05	0.00120157
27274	Zfp354b	zinc finger protein 354B	-0.247442	-7.10448	6.97992e-05	0.00120157
19729	Slc50a1	solute carrier family 50 (sugar transporter), member 1	-0.925175	-7.09711	7.03434e-05	0.00120726
230279	Tmem268	transmembrane protein 268	-1.00955	-7.08148	7.15128e-05	0.00122362
56485	Slc2a5	solute carrier family 2 (facilitated glucose transporter), member 5	-1.87203	-7.07616	7.19158e-05	0.00122865
14450	Gart	phosphoribosylglycinamide formyltransferase	-0.792201	-7.07233	7.22077e-05	0.00123178
68393	Mogat1	monoacylglycerol O-acyltransferase 1	-0.80212	-7.06724	7.25973e-05	0.0012347
56199	Abcb10	ATP-binding cassette, sub-family B (MDR/TAP), member 10	-0.912443	-7.06398	7.28478e-05	0.00123525
114642	Brdt	bromodomain, testis-specific	-0.210416	-7.05072	7.38775e-05	0.00124606
229615	Pias3	protein inhibitor of activated STAT 3	-0.469704	-7.0501	7.39263e-05	0.00124606
110074	Dut	deoxyuridine triphosphatase	-0.717641	-7.04386	7.44164e-05	0.00125245
212285	Arap2	ArfGAP with RhoGAP domain, ankyrin repeat and PH domain 2	-0.407142	-7.02436	7.59727e-05	0.00127485
20937	Suv39h1	suppressor of variegation 3-9 1	-0.221732	-7.02017	7.63116e-05	0.00127864
66706	Ndufaf3	NADH:ubiquinone oxidoreductase complex assembly factor 3	-0.789605	-7.00954	7.7179e-05	0.0012881
66839	Dele1	DAP3 binding cell death enhancer 1	-0.863009	-7.00907	7.72177e-05	0.0012881
107986	Ddb2	damage specific DNA binding protein 2	-0.54565	-7.00487	7.75634e-05	0.00129196
14469	Gbp2	guanylate binding protein 2	-1.61816	-6.99587	7.83102e-05	0.00130248
53902	Rcan3	regulator of calcineurin 3	-0.588447	-6.96743	8.07234e-05	0.00133088
70551	Tmtc4	transmembrane and tetratricopeptide repeat containing 4	-0.384274	-6.96602	8.08445e-05	0.00133093
66082	Abhd6	abhydrolase domain containing 6	-0.999502	-6.96331	8.1079e-05	0.00133285
105245	Txndc5	thioredoxin domain containing 5	-1.04608	-6.96177	8.12132e-05	0.00133312
110208	Pgd	phosphogluconate dehydrogenase	-1.1173	-6.95608	8.17086e-05	0.00133715
19079	Prkab1	protein kinase, AMP-activated, beta 1 non-catalytic subunit	-0.919437	-6.93638	8.34506e-05	0.00136194
19367	Rad9a	RAD9 checkpoint clamp component A	-0.558666	-6.92806	8.41984e-05	0.00137019
53321	Cntnap1	contactin associated protein-like 1	-0.965786	-6.89154	8.75704e-05	0.00141489
18194	Nsdhl	NAD(P) dependent steroid dehydrogenase-like	-1.09468	-6.87668	8.89845e-05	0.00142754
50723	Icosl	icos ligand	-0.370662	-6.85937	9.06637e-05	0.00144423
16846	Lep	leptin	-2.78895	-6.85688	9.09081e-05	0.00144609
22754	Zfp92	zinc finger protein 92	-0.0581652	-6.85293	9.12967e-05	0.00145023
26407	Map3k4	mitogen-activated protein kinase kinase kinase 4	-0.637047	-6.8445	9.21333e-05	0.00145895
67393	Cxxc5	CXXC finger 5	-1.01528	-6.84389	9.21944e-05	0.00145895
108687	Edem2	ER degradation enhancer, mannosidase alpha-like 2	-0.552283	-6.84351	9.22325e-05	0.00145895
12589	Ift81	intraflagellar transport 81	-0.923782	-6.82487	9.41141e-05	0.00148456
74122	Tmem43	transmembrane protein 43	-1.04503	-6.82227	9.438e-05	0.00148668
67623	Tm7sf3	transmembrane 7 superfamily member 3	-0.646756	-6.81662	9.49599e-05	0.0014887
68298	Ncapd2	non-SMC condensin I complex, subunit D2	-0.55139	-6.8159	9.50344e-05	0.0014887
66059	Krtcap2	keratinocyte associated protein 2	-0.528683	-6.81209	9.54287e-05	0.00149281
15953	Ifi47	interferon gamma inducible protein 47	-0.561491	-6.80798	9.58553e-05	0.00149737
108105	B3gnt5	UDP-GlcNAc:betaGal beta-1,3-N-acetylglucosaminyltransferase 5	-0.0998424	-6.80674	9.59854e-05	0.00149737
93760	Arid1a	AT rich interactive domain 1A (SWI-like)	-0.429824	-6.80035	9.66542e-05	0.00150366
74048	Vsir	V-set immunoregulatory receptor	-0.76161	-6.79508	9.72102e-05	0.00151023
15950	Ifi203	interferon activated gene 203	-0.57948	-6.78709	9.80589e-05	0.00151924
27359	Sytl4	synaptotagmin-like 4	-0.553478	-6.78	9.88195e-05	0.00152893
69168	Bola1	bolA-like 1 (E. coli)	-0.599211	-6.77534	9.93223e-05	0.00153461
20341	Selenbp1	selenium binding protein 1	-1.076	-6.7575	0.000101275	0.0015584
12460	Ccs	copper chaperone for superoxide dismutase	-0.759558	-6.74384	0.0001028	0.00157756
11302	Aatk	apoptosis-associated tyrosine kinase	-1.08385	-6.73356	0.000103963	0.00158232
19895	Rpia	ribose 5-phosphate isomerase A	-0.937849	-6.72534	0.000104903	0.00159042
67416	Armcx2	armadillo repeat containing, X-linked 2	-0.252706	-6.72351	0.000105114	0.00159148
77113	Klhl2	kelch-like 2, Mayven	-1.00785	-6.72088	0.000105417	0.00159394
229900	Gbp7	guanylate binding protein 7	-1.0969	-6.71215	0.000106432	0.00160286
13821	Epb41l1	erythrocyte membrane protein band 4.1 like 1	-0.632773	-6.70498	0.000107273	0.00161337
17250	Abcc1	ATP-binding cassette, sub-family C (CFTR/MRP), member 1	-0.815827	-6.69945	0.000107927	0.00162106
84004	Mcam	melanoma cell adhesion molecule	-0.858612	-6.67807	0.000110497	0.00165306
70152	Mettl7a1	methyltransferase like 7A1	-1.0301	-6.66782	0.000111752	0.00166964
20679	Sox6	SRY (sex determining region Y)-box 6	-0.933111	-6.65237	0.000113674	0.00167939
68275	Rpa1	replication protein A1	-0.596267	-6.65198	0.000113723	0.00167939
69305	Dcps	decapping enzyme, scavenger	-1.01893	-6.65103	0.000113842	0.00167939
66522	Pgpep1	pyroglutamyl-peptidase I	-0.568278	-6.65066	0.000113889	0.00167939
52428	Rhpn2	rhophilin, Rho GTPase binding protein 2	-0.515914	-6.6483	0.000114187	0.00168158
67226	Tmem19	transmembrane protein 19	-0.62556	-6.6423	0.000114946	0.00168837
30924	Angptl3	angiopoietin-like 3	-0.372355	-6.63952	0.0001153	0.00169137
68323	Nudt22	nudix (nucleoside diphosphate linked moiety X)-type motif 22	-0.608787	-6.6262	0.000117014	0.00171206
27015	Polk	polymerase (DNA directed), kappa	-0.420271	-6.62266	0.000117473	0.00171435
52502	Carhsp1	calcium regulated heat stable protein 1	-0.924982	-6.60358	0.000119986	0.00174131
20111	Rps6ka1	ribosomal protein S6 kinase polypeptide 1	-0.539076	-6.60282	0.000120088	0.00174131
233913	BC017158	cDNA sequence BC017158	-0.522324	-6.6028	0.000120091	0.00174131
75746	Morc4	microrchidia 4	-0.392604	-6.59487	0.000121153	0.00174999
22341	Vegfc	vascular endothelial growth factor C	-0.605589	-6.58594	0.000122363	0.00176222
69922	Vrk2	vaccinia related kinase 2	-0.343072	-6.58351	0.000122693	0.00176229
77569	Limch1	LIM and calponin homology domains 1	-0.836883	-6.58171	0.00012294	0.00176229
69601	Dab2ip	disabled 2 interacting protein	-0.653716	-6.56936	0.000124642	0.00177544
81910	Rrbp1	ribosome binding protein 1	-0.604723	-6.56766	0.000124878	0.00177657
14809	Grik5	glutamate receptor, ionotropic, kainate 5 (gamma 2)	-0.517334	-6.55212	0.000127063	0.00180131
80907	Lactb	lactamase, beta	-0.758737	-6.55189	0.000127095	0.00180131
57373	Akip1	A kinase (PRKA) interacting protein 1	-0.856461	-6.54992	0.000127375	0.00180301
547253	Parp14	poly (ADP-ribose) polymerase family, member 14	-0.558185	-6.54816	0.000127626	0.0018032
60596	Gucy1a1	guanylate cyclase 1, soluble, alpha 1	-0.64379	-6.54759	0.000127707	0.0018032
233552	Gdpd5	glycerophosphodiester phosphodiesterase domain containing 5	-0.688858	-6.53728	0.000129187	0.00182182
100678	Psph	phosphoserine phosphatase	-0.851009	-6.53483	0.000129542	0.00182317
117160	Ttyh2	tweety family member 2	-1.15968	-6.5344	0.000129604	0.00182317
18968	Pola1	polymerase (DNA directed), alpha 1	-0.325635	-6.53327	0.000129768	0.0018232
67374	Jam2	junction adhesion molecule 2	-0.771832	-6.52566	0.000130878	0.00183196
13549	Dyrk1b	dual-specificity tyrosine-(Y)-phosphorylation regulated kinase 1b	-0.904224	-6.52438	0.000131066	0.00183233
12503	Cd247	CD247 antigen	-0.17434	-6.52043	0.000131648	0.00183765
67528	Nudt7	nudix (nucleoside diphosphate linked moiety X)-type motif 7	-0.703537	-6.51959	0.000131771	0.00183765
56072	Lgals12	lectin, galactose binding, soluble 12	-1.18229	-6.51821	0.000131975	0.00183823
19062	Inpp5k	inositol polyphosphate 5-phosphatase K	-0.622487	-6.5147	0.000132495	0.00183846
77590	Chst15	carbohydrate sulfotransferase 15	-1.17215	-6.51283	0.000132773	0.00183846
230738	Zc3h12a	zinc finger CCCH type containing 12A	-0.54656	-6.51212	0.000132879	0.00183846
77697	Mmab	methylmalonic aciduria (cobalamin deficiency) cblB type homolog (human)	-0.956076	-6.51198	0.0001329	0.00183846
208884	Zdhhc9	zinc finger, DHHC domain containing 9	-0.248347	-6.49999	0.0001347	0.0018511
17329	Cxcl9	chemokine (C-X-C motif) ligand 9	-1.03462	-6.49678	0.000135187	0.00185554
58520	Erg28	ergosterol biosynthesis 28	-0.476488	-6.49444	0.000135542	0.00185816
20684	Sp100	nuclear antigen Sp100	-0.383206	-6.4809	0.000137622	0.0018821
208198	Btbd2	BTB (POZ) domain containing 2	-0.860398	-6.47731	0.000138179	0.0018821
330189	Tmem120b	transmembrane protein 120B	-1.19	-6.47552	0.000138457	0.0018821
19106	Eif2ak2	eukaryotic translation initiation factor 2-alpha kinase 2	-0.754684	-6.47448	0.00013862	0.0018821
102791	Tcta	T cell leukemia translocation altered gene	-1.05552	-6.47174	0.000139048	0.00188565
380912	Zfp395	zinc finger protein 395	-0.644111	-6.45877	0.000141095	0.00190655
19212	Pter	phosphotriesterase related	-0.505351	-6.45742	0.00014131	0.00190719
11810	Apobec1	apolipoprotein B mRNA editing enzyme, catalytic polypeptide 1	-0.782525	-6.45222	0.000142142	0.00191482
19411	Rarg	retinoic acid receptor, gamma	-0.594827	-6.45177	0.000142215	0.00191482
72149	Strada	STE20-related kinase adaptor alpha	-0.442148	-6.44786	0.000142843	0.00191753
235559	Topbp1	topoisomerase (DNA) II binding protein 1	-0.514166	-6.44735	0.000142925	0.00191753
110253	Triobp	TRIO and F-actin binding protein	-0.611082	-6.43811	0.000144425	0.0019285
16362	Irf1	interferon regulatory factor 1	-0.974707	-6.43612	0.000144751	0.00193058
214944	Mob3b	MOB kinase activator 3B	-0.733866	-6.4348	0.000144966	0.00193075
11819	Nr2f2	nuclear receptor subfamily 2, group F, member 2	-0.278004	-6.43396	0.000145105	0.00193075
57896	Krcc1	lysine-rich coiled-coil 1	-0.481866	-6.4211	0.000147231	0.00195444
11492	Adam19	a disintegrin and metallopeptidase domain 19 (meltrin beta)	-0.32056	-6.41532	0.000148199	0.0019627
13433	Dnmt1	DNA methyltransferase (cytosine-5) 1	-0.635278	-6.41531	0.0001482	0.0019627
320484	Rasal3	RAS protein activator like 3	-0.158871	-6.41179	0.000148792	0.0019674
66427	Cyb5b	cytochrome b5 type B	-0.880971	-6.41113	0.000148903	0.0019674
13435	Dnmt3a	DNA methyltransferase 3A	-0.46316	-6.40745	0.000149527	0.00197334
16443	Itsn1	intersectin 1 (SH3 domain protein 1A)	-0.272212	-6.40432	0.000150059	0.00197577
245000	Atr	ataxia telangiectasia and Rad3 related	-0.419649	-6.40431	0.00015006	0.00197577
20588	Smarcc1	SWI/SNF related, matrix associated, actin dependent regulator of chromatin, subfamily c, member 1	-0.522565	-6.40252	0.000150365	0.00197747
72029	Cnpy3	canopy FGF signaling regulator 3	-0.422308	-6.39602	0.000151478	0.0019898
229228	Nudt6	nudix (nucleoside diphosphate linked moiety X)-type motif 6	-0.691417	-6.3944	0.000151757	0.00199115
106821	Oard1	O-acyl-ADP-ribose deacylase 1	-0.944062	-6.39336	0.000151937	0.0019912
18186	Nrp1	neuropilin 1	-1.04723	-6.39102	0.000152341	0.00199189
23854	Def8	differentially expressed in FDCP 8	-0.692654	-6.3866	0.000153109	0.00199731
74665	Drc3	dynein regulatory complex subunit 3	-0.124562	-6.38041	0.00015419	0.00200909
21423	Tcf3	transcription factor 3	-0.486508	-6.36011	0.000157795	0.00205185
223693	Tmem184b	transmembrane protein 184b	-0.559532	-6.35989	0.000157834	0.00205185
103743	Tmem98	transmembrane protein 98	-0.377803	-6.35557	0.000158615	0.00205963
110078	Pygb	brain glycogen phosphorylase	-1.33934	-6.35104	0.000159437	0.00206556
53415	Htatip2	HIV-1 Tat interactive protein 2	-0.467641	-6.33158	0.00016302	0.00210234
234353	Psd3	pleckstrin and Sec7 domain containing 3	-0.375684	-6.32918	0.000163467	0.00210571
229877	Rap1gds1	RAP1, GTP-GDP dissociation stimulator 1	-0.60876	-6.32758	0.000163768	0.00210617
116701	Fgfrl1	fibroblast growth factor receptor-like 1	-0.950475	-6.32612	0.000164041	0.00210617
71913	Tmem79	transmembrane protein 79	-1.33224	-6.32601	0.000164061	0.00210617
102693	Phldb1	pleckstrin homology like domain, family B, member 1	-0.824847	-6.31151	0.000166808	0.00213658
12234	Btrc	beta-transducin repeat containing protein	-0.403206	-6.30861	0.000167364	0.00214125
20947	Swap70	SWA-70 protein	-0.358375	-6.28064	0.000172823	0.00220116
233064	Wdr62	WD repeat domain 62	-0.315505	-6.26883	0.000175189	0.00221716
73102	Slc22a23	solute carrier family 22, member 23	-0.540574	-6.25649	0.000177696	0.00224052
68114	Pwwp3a	PWWP domain containing 3A, DNA repair factor	-0.803692	-6.25066	0.000178894	0.00225301
234875	Ttc13	tetratricopeptide repeat domain 13	-0.468255	-6.24974	0.000179085	0.00225301
18105	Nqo2	N-ribosyldihydronicotinamide quinone reductase 2	-0.922657	-6.24615	0.000179827	0.00225983
216134	Pdxk	pyridoxal (pyridoxine, vitamin B6) kinase	-0.606428	-6.23255	0.000182674	0.00228544
72599	Pdia5	protein disulfide isomerase associated 5	-0.874023	-6.22548	0.000184175	0.00230167
107250	Kazald1	Kazal-type serine peptidase inhibitor domain 1	-0.739997	-6.22209	0.000184897	0.00230816
11754	Aoc3	amine oxidase, copper containing 3	-1.27373	-6.21521	0.000186375	0.00232148
66566	Ntpcr	nucleoside-triphosphatase, cancer-related	-0.534397	-6.20776	0.000187991	0.00233646
12354	Car7	carbonic anhydrase 7	-0.405739	-6.19572	0.000190633	0.00236151
68080	Gpn3	GPN-loop GTPase 3	-0.607497	-6.19149	0.000191571	0.00237054
72103	Aplf	aprataxin and PNKP like factor	-0.406668	-6.18888	0.000192154	0.00237203
112403	Dxo	decapping exoribonuclease	-0.669005	-6.18813	0.000192321	0.00237203
99167	Ssx2ip	synovial sarcoma, X 2 interacting protein	-0.620863	-6.1771	0.000194801	0.0024
11804	Aplp2	amyloid beta (A4) precursor-like protein 2	-0.900155	-6.17477	0.000195329	0.00240388
14088	Fancc	Fanconi anemia, complementation group C	-0.251111	-6.17344	0.000195632	0.002405
76491	Abhd14b	abhydrolase domain containing 14b	-1.13716	-6.16868	0.000196718	0.00241275
20187	Ryk	receptor-like tyrosine kinase	-0.530558	-6.16788	0.000196902	0.00241275
54598	Calcrl	calcitonin receptor-like	-0.669468	-6.15116	0.000200774	0.00244957
229521	Syt11	synaptotagmin XI	-0.490097	-6.149	0.000201281	0.00245312
66407	Mrps15	mitochondrial ribosomal protein S15	-0.646633	-6.14246	0.000202822	0.00246596
216565	Ehbp1	EH domain binding protein 1	-0.404562	-6.13417	0.000204796	0.00248272
50915	Grb14	growth factor receptor bound protein 14	-1.09506	-6.13377	0.00020489	0.00248272
103655	Sec14l4	SEC14-like lipid binding 4	-0.927037	-6.1317	0.000205387	0.00248272
110606	Fntb	farnesyltransferase, CAAX box, beta	-0.549091	-6.1285	0.000206157	0.00248272
22771	Zic1	zinc finger protein of the cerebellum 1	-0.538847	-6.12843	0.000206173	0.00248272
66310	Dpy30	dpy-30, histone methyltransferase complex regulatory subunit	-0.779248	-6.12818	0.000206232	0.00248272
69536	Hemk1	HemK methyltransferase family member 1	-0.982746	-6.12772	0.000206345	0.00248272
75578	Fggy	FGGY carbohydrate kinase domain containing	-0.502893	-6.12024	0.000208156	0.00249504
75764	Slx1b	SLX1 structure-specific endonuclease subunit homolog B (S. cerevisiae)	-0.486917	-6.12017	0.000208175	0.00249504
26426	Nubp2	nucleotide binding protein 2	-0.658605	-6.11986	0.000208251	0.00249504
76608	Hectd3	HECT domain E3 ubiquitin protein ligase 3	-0.63886	-6.11888	0.000208488	0.00249524
71756	Cpn2	carboxypeptidase N, polypeptide 2	-0.940135	-6.10994	0.000210682	0.00251617
74167	Nudt9	nudix (nucleoside diphosphate linked moiety X)-type motif 9	-0.559643	-6.10717	0.000211366	0.00252168
22427	Wrn	Werner syndrome RecQ like helicase	-0.708898	-6.10203	0.000212644	0.00253158
12568	Cdk5	cyclin-dependent kinase 5	-0.71201	-6.0962	0.000214103	0.00254565
16825	Ldb1	LIM domain binding 1	-0.578373	-6.09551	0.000214276	0.00254565
22433	Xbp1	X-box binding protein 1	-1.26029	-6.09298	0.000214912	0.00255053
60525	Acss2	acyl-CoA synthetase short-chain family member 2	-1.50152	-6.09082	0.000215458	0.00255433
347722	Agap1	ArfGAP with GTPase domain, ankyrin repeat and PH domain 1	-0.43652	-6.08122	0.0002179	0.00257746
20851	Stat5b	signal transducer and activator of transcription 5B	-0.696737	-6.0803	0.000218137	0.00257746
66116	Nat8f1	N-acetyltransferase 8 (GCN5-related) family member 1	-0.67181	-6.07698	0.000218988	0.00258264
66880	Rsrc1	arginine/serine-rich coiled-coil 1	-0.232238	-6.07224	0.000220212	0.00259437
11496	Adam22	a disintegrin and metallopeptidase domain 22	-0.218609	-6.06815	0.000221275	0.00260122
234796	Klhl36	kelch-like 36	-0.530997	-6.06735	0.000221483	0.00260122
12315	Calm3	calmodulin 3	-0.691847	-6.06078	0.000223201	0.00261596
319565	Syne2	spectrin repeat containing, nuclear envelope 2	-0.774807	-6.05909	0.000223646	0.00261846
94192	C1galt1	core 1 synthase, glycoprotein-N-acetylgalactosamine 3-beta-galactosyltransferase, 1	-0.566277	-6.05617	0.000224417	0.00262477
67956	Kmt5a	lysine methyltransferase 5A	-0.453557	-6.05178	0.000225581	0.00263567
192285	Phf21a	PHD finger protein 21A	-0.399123	-6.04984	0.000226098	0.00263898
228550	Itpka	inositol 1,4,5-trisphosphate 3-kinase A	-0.999138	-6.04778	0.000226648	0.00264267
72265	Tram1	translocating chain-associating membrane protein 1	-0.744448	-6.03048	0.000231324	0.00268611
211347	Pank3	pantothenate kinase 3	-0.986522	-6.02869	0.000231811	0.00268778
56711	Plag1	pleiomorphic adenoma gene 1	-0.406721	-6.02079	0.000233987	0.00270407
14251	Flot1	flotillin 1	-0.700271	-6.02051	0.000234066	0.00270407
17218	Mcm5	minichromosome maintenance complex component 5	-0.354546	-6.01815	0.000234719	0.00270884
100121	Tdrd7	tudor domain containing 7	-0.773411	-6.01441	0.000235759	0.00271808
245886	Ankrd27	ankyrin repeat domain 27 (VPS9 domain)	-0.85474	-6.00475	0.000238471	0.0027438
15425	Hoxc6	homeobox C6	-0.558329	-6.00474	0.000238476	0.0027438
78286	Nav2	neuron navigator 2	-0.482159	-6.00035	0.000239718	0.00275333
17686	Msh3	mutS homolog 3	-0.86844	-5.97908	0.000245845	0.00280859
18514	Pbx1	pre B cell leukemia homeobox 1	-0.431282	-5.97153	0.000248061	0.00282535
22724	Zbtb7b	zinc finger and BTB domain containing 7B	-0.660809	-5.96752	0.000249248	0.00283439
66090	Ypel3	yippee like 3	-0.674703	-5.96676	0.000249472	0.00283439
15504	Dnajb3	DnaJ heat shock protein family (Hsp40) member B3	-0.66243	-5.96581	0.000249756	0.00283439
18624	Pepd	peptidase D	-0.621313	-5.95811	0.000252054	0.00285644
50798	Gne	glucosamine (UDP-N-acetyl)-2-epimerase/N-acetylmannosamine kinase	-0.595297	-5.9563	0.000252599	0.00285976
60440	Iigp1	interferon inducible GTPase 1	-1.57599	-5.95456	0.000253123	0.00286283
11732	Ank	progressive ankylosis	-1.27124	-5.95319	0.000253536	0.00286462
20893	Bhlhe40	basic helix-loop-helix family, member e40	-1.70127	-5.94658	0.000255539	0.00288151
192166	Sardh	sarcosine dehydrogenase	-0.64396	-5.94177	0.00025701	0.00288979
56644	Clec7a	C-type lectin domain family 7, member a	-0.546272	-5.94033	0.000257453	0.00289094
21915	Dtymk	deoxythymidylate kinase	-0.657048	-5.93967	0.000257654	0.00289094
114643	Oas1c	2'-5' oligoadenylate synthetase 1C	-0.221181	-5.93851	0.000258012	0.00289209
12545	Cdc7	cell division cycle 7 (S. cerevisiae)	-0.643588	-5.93245	0.000259887	0.0029016
114886	Cygb	cytoglobin	-0.747946	-5.92056	0.000263604	0.00293382
229658	Vangl1	VANGL planar cell polarity 1	-0.551978	-5.91991	0.00026381	0.00293382
94249	Slc24a3	solute carrier family 24 (sodium/potassium/calcium exchanger), member 3	-0.589767	-5.91714	0.000264684	0.00294065
12479	Cd1d1	CD1d1 antigen	-0.868616	-5.90984	0.000267007	0.00296063
68964	Ctc1	CTS telomere maintenance complex component 1	-0.464169	-5.90673	0.000268002	0.00296876
14792	Lpcat3	lysophosphatidylcholine acyltransferase 3	-0.413659	-5.90422	0.000268808	0.00297477
18207	Nthl1	nth (endonuclease III)-like 1 (E.coli)	-0.822727	-5.90309	0.000269172	0.00297589
171504	Apobr	apolipoprotein B receptor	-0.623918	-5.89812	0.000270781	0.00299075
67213	Cmtm6	CKLF-like MARVEL transmembrane domain containing 6	-0.758118	-5.8954	0.000271666	0.00299469
70155	Ogfrl1	opioid growth factor receptor-like 1	-0.490808	-5.89449	0.00027196	0.002995
66812	Ppcdc	phosphopantothenoylcysteine decarboxylase	-0.794685	-5.88876	0.000273836	0.00300359
70122	Mllt3	myeloid/lymphoid or mixed-lineage leukemia; translocated to, 3	-0.30739	-5.8882	0.000274023	0.00300359
56279	Dipk1b	divergent protein kinase domain 1B	-0.799886	-5.88758	0.000274224	0.00300359
13134	Dach1	dachshund family transcription factor 1	-0.402597	-5.8875	0.000274253	0.00300359
17920	Myo6	myosin VI	-0.428675	-5.88677	0.000274491	0.00300359
18391	Sigmar1	sigma non-opioid intracellular receptor 1	-0.798886	-5.88645	0.000274598	0.00300359
72568	Lin9	lin-9 homolog (C. elegans)	-0.548736	-5.87786	0.000277444	0.00302885
93875	Pcdhb4	protocadherin beta 4	-0.224438	-5.87081	0.000279804	0.00304873
16907	Lmnb2	lamin B2	-0.629203	-5.86799	0.000280753	0.00305328
15587	Hyal2	hyaluronoglucosaminidase 2	-0.585138	-5.86797	0.000280761	0.00305328
20585	Hltf	helicase-like transcription factor	-0.606092	-5.86207	0.00028276	0.00307206
98999	Znfx1	zinc finger, NFX1-type containing 1	-0.575145	-5.85898	0.000283814	0.00307298
66972	Slc25a23	solute carrier family 25 (mitochondrial carrier; phosphate carrier), member 23	-0.663104	-5.85831	0.000284044	0.00307298
230936	Phf13	PHD finger protein 13	-0.227123	-5.85714	0.000284443	0.00307298
52609	Cbx7	chromobox 7	-0.348875	-5.85625	0.000284748	0.00307298
270151	Nlrx1	NLR family member X1	-0.92343	-5.85571	0.000284933	0.00307298
68801	Elovl5	ELOVL family member 5, elongation of long chain fatty acids (yeast)	-0.80136	-5.84525	0.000288546	0.0031051
53886	Cdkl2	cyclin-dependent kinase-like 2 (CDC2-related kinase)	-0.444751	-5.83984	0.000290435	0.00311845
54445	Unc93b1	unc-93 homolog B1, TLR signaling regulator	-0.750821	-5.83918	0.000290669	0.00311845
11666	Abcd1	ATP-binding cassette, sub-family D (ALD), member 1	-0.692081	-5.83855	0.00029089	0.00311845
107932	Chd4	chromodomain helicase DNA binding protein 4	-0.860452	-5.8363	0.000291681	0.00312101
74096	Hvcn1	hydrogen voltage-gated channel 1	-0.394707	-5.83319	0.000292774	0.00312877
59308	Emcn	endomucin	-0.688616	-5.83189	0.000293235	0.00312877
54396	Irgm2	immunity-related GTPase family M member 2	-1.09097	-5.82812	0.000294575	0.0031401
18405	Orm1	orosomucoid 1	-0.833592	-5.82664	0.000295102	0.00314276
212139	Cc2d1a	coiled-coil and C2 domain containing 1A	-0.419952	-5.82251	0.000296576	0.00315548
11920	Atm	ataxia telangiectasia mutated	-0.571569	-5.82041	0.000297332	0.00316055
16548	Khk	ketohexokinase	-1.00453	-5.81429	0.000299539	0.00318102
72018	Fundc1	FUN14 domain containing 1	-0.550017	-5.81227	0.000300272	0.00318581
214580	Pstk	phosphoseryl-tRNA kinase	-0.72039	-5.80873	0.00030156	0.00319648
104112	Acly	ATP citrate lyase	-1.87754	-5.80714	0.000302144	0.00319967
104383	Rcor2	REST corepressor 2	-0.645365	-5.80395	0.00030331	0.00320902
53883	Celsr2	cadherin, EGF LAG seven-pass G-type receptor 2	-0.216655	-5.79922	0.000305055	0.00322446
27360	Add3	adducin 3 (gamma)	-0.605851	-5.7969	0.000305913	0.00323051
68737	Angel1	angel homolog 1	-0.298052	-5.78916	0.000308798	0.00325793
69574	Cmbl	carboxymethylenebutenolidase-like (Pseudomonas)	-0.711014	-5.7882	0.000309158	0.00325869
67037	Pmf1	polyamine-modulated factor 1	-0.805303	-5.78298	0.00031112	0.00327472
20302	Ccl3	chemokine (C-C motif) ligand 3	-0.249435	-5.78262	0.000311257	0.00327472
17101	Lyst	lysosomal trafficking regulator	-0.74275	-5.78033	0.000312124	0.00328079
58245	Gpr180	G protein-coupled receptor 180	-0.815647	-5.77694	0.000313413	0.00328822
207818	Smagp	small cell adhesion glycoprotein	-0.975199	-5.76722	0.000317137	0.00332113
234564	Ces1f	carboxylesterase 1F	-0.956875	-5.7662	0.00031753	0.00332217
66058	Tmem176a	transmembrane protein 176A	-0.91188	-5.7631	0.00031873	0.00332648
79233	Zfp319	zinc finger protein 319	-0.317111	-5.76285	0.000318824	0.00332648
93685	Entpd7	ectonucleoside triphosphate diphosphohydrolase 7	-0.272908	-5.76022	0.000319846	0.00333405
67776	Vwa5a	von Willebrand factor A domain containing 5A	-0.668345	-5.75894	0.000320344	0.00333405
14701	Gng12	guanine nucleotide binding protein (G protein), gamma 12	-0.37763	-5.75717	0.000321035	0.00333723
26399	Map2k6	mitogen-activated protein kinase kinase 6	-0.606547	-5.75227	0.000322958	0.00334799
15944	Irgm1	immunity-related GTPase family M member 1	-0.54568	-5.74388	0.000326275	0.00337927
26358	Aldh1a7	aldehyde dehydrogenase family 1, subfamily A7	-0.848111	-5.74011	0.00032778	0.00339176
52857	Gramd1a	GRAM domain containing 1A	-0.806019	-5.73933	0.000328093	0.00339189
64685	Nmi	N-myc (and STAT) interactor	-0.538891	-5.73214	0.000330984	0.00341493
68192	Leprotl1	leptin receptor overlapping transcript-like 1	-0.328617	-5.73079	0.000331529	0.00341493
228140	Tnks1bp1	tankyrase 1 binding protein 1	-0.906789	-5.727	0.000333064	0.00342762
14534	Kat2a	K(lysine) acetyltransferase 2A	-0.453556	-5.72303	0.000334683	0.00343803
93732	Acox2	acyl-Coenzyme A oxidase 2, branched chain	-0.478531	-5.71894	0.000336361	0.00345213
16570	Kif3c	kinesin family member 3C	-0.320156	-5.71507	0.000337956	0.00345908
17919	Myo5b	myosin VB	-0.727218	-5.70892	0.000340508	0.00348204
14169	Fgf14	fibroblast growth factor 14	-0.691934	-5.70281	0.000343063	0.00350186
17096	Lyn	LYN proto-oncogene, Src family tyrosine kinase	-0.509317	-5.69984	0.000344315	0.00351031
75985	Rab30	RAB30, member RAS oncogene family	-0.81044	-5.69937	0.000344514	0.00351031
55927	Hes6	hairy and enhancer of split 6	-0.716247	-5.69592	0.000345973	0.00351884
22021	Tpst1	protein-tyrosine sulfotransferase 1	-0.697996	-5.69397	0.000346801	0.0035241
232449	Dera	deoxyribose-phosphate aldolase (putative)	-0.90923	-5.69302	0.000347204	0.00352502
54397	Ppt2	palmitoyl-protein thioesterase 2	-0.746696	-5.69189	0.000347686	0.00352675
72194	Fbxl20	F-box and leucine-rich repeat protein 20	-0.557117	-5.6873	0.000349648	0.00354348
57890	Il17re	interleukin 17 receptor E	-0.699392	-5.68588	0.000350259	0.00354649
109136	Mmaa	methylmalonic aciduria (cobalamin deficiency) type A	-0.575899	-5.68113	0.000352304	0.003564
57170	Dolpp1	dolichyl pyrophosphate phosphatase 1	-0.616881	-5.67858	0.000353408	0.00357198
99311	Commd7	COMM domain containing 7	-0.362517	-5.66906	0.000357568	0.0036108
53970	Rfx5	regulatory factor X, 5 (influences HLA class II expression)	-0.409362	-5.66637	0.000358752	0.00361952
56453	Mbtps1	membrane-bound transcription factor peptidase, site 1	-0.446549	-5.66443	0.000359609	0.00362015
67017	Fam210b	family with sequence similarity 210, member B	-0.488004	-5.66406	0.000359772	0.00362015
66406	Sac3d1	SAC3 domain containing 1	-0.758073	-5.65747	0.000362698	0.00364633
24000	Ptpn21	protein tyrosine phosphatase, non-receptor type 21	-0.30108	-5.6552	0.000363715	0.00365331
66648	Tpgs2	tubulin polyglutamylase complex subunit 2	-0.382522	-5.65197	0.000365166	0.00366462
19300	Abcd4	ATP-binding cassette, sub-family D (ALD), member 4	-0.817213	-5.64278	0.000369322	0.00369649
20148	Dhrs3	dehydrogenase/reductase (SDR family) member 3	-0.641258	-5.64168	0.000369823	0.00369823
70615	Ankrd24	ankyrin repeat domain 24	-0.353808	-5.63918	0.000370963	0.00370635
170772	Glcci1	glucocorticoid induced transcript 1	-0.221519	-5.63695	0.000371987	0.00371214
217837	Itpk1	inositol 1,3,4-triphosphate 5/6 kinase	-1.04847	-5.63649	0.000372199	0.00371214
14066	F3	coagulation factor III	-0.974415	-5.62772	0.000376248	0.00374592
66257	Nicn1	nicolin 1	-0.671889	-5.62479	0.000377609	0.0037541
66596	Gtf3a	general transcription factor III A	-0.328861	-5.62453	0.000377734	0.0037541
16155	Il10rb	interleukin 10 receptor, beta	-0.816351	-5.62249	0.000378682	0.00376023
56526	2019-09-06	septin 6	-0.20011	-5.6193	0.000380182	0.00377181
23947	Mid2	midline 2	-0.443667	-5.6145	0.000382443	0.00378919
23885	Gmcl1	germ cell-less, spermatogenesis associated 1	-0.490194	-5.61303	0.000383138	0.00379115
17909	Myo10	myosin X	-0.594049	-5.61104	0.000384083	0.00379718
67013	Oma1	OMA1 zinc metallopeptidase	-0.55619	-5.60337	0.000387743	0.00383002
23972	Papss2	3'-phosphoadenosine 5'-phosphosulfate synthase 2	-0.699802	-5.60216	0.000388328	0.00383246
23943	Esyt1	extended synaptotagmin-like protein 1	-0.878547	-5.58734	0.000395523	0.00390006
66568	Rwdd3	RWD domain containing 3	-0.487894	-5.5847	0.00039682	0.00390604
66365	Ccdc90b	coiled-coil domain containing 90B	-0.458848	-5.58166	0.00039832	0.00391739
118445	Klf16	Kruppel-like factor 16	-0.529805	-5.5742	0.000402024	0.00394696
19891	Rpa2	replication protein A2	-0.559848	-5.57098	0.000403638	0.00395936
67111	Naaa	N-acylethanolamine acid amidase	-0.961052	-5.56938	0.000404438	0.00396377
109929	Zbtb25	zinc finger and BTB domain containing 25	-0.339226	-5.56857	0.000404847	0.00396435
14860	Gsta4	glutathione S-transferase, alpha 4	-0.726873	-5.56461	0.000406846	0.00397703
55934	Rp9	retinitis pigmentosa 9 (human)	-0.782379	-5.56219	0.000408071	0.00398557
52830	Pnrc2	proline-rich nuclear receptor coactivator 2	-0.579349	-5.5608	0.000408777	0.00398867
235627	Nbeal2	neurobeachin-like 2	-0.367597	-5.56018	0.000409094	0.00398867
26429	Orc5	origin recognition complex, subunit 5	-0.583173	-5.54779	0.00041545	0.00404715
19218	Ptger3	prostaglandin E receptor 3 (subtype EP3)	-1.46658	-5.53999	0.000419507	0.00407711
68632	Myct1	myc target 1	-0.850899	-5.53904	0.000420006	0.00407748
30791	Slc39a1	solute carrier family 39 (zinc transporter), member 1	-0.597254	-5.52901	0.000425291	0.00412171
231093	Agbl5	ATP/GTP binding protein-like 5	-0.225462	-5.52462	0.000427632	0.00414086
217473	Ankmy2	ankyrin repeat and MYND domain containing 2	-0.77334	-5.52296	0.000428516	0.00414249
67606	Fibin	fin bud initiation factor homolog (zebrafish)	-0.746663	-5.52036	0.000429913	0.00414996
24018	Rngtt	RNA guanylyltransferase and 5'-phosphatase	-0.283848	-5.51742	0.000431494	0.0041569
103733	Tubg1	tubulin, gamma 1	-0.800025	-5.51027	0.000435366	0.00418351
27410	Abca3	ATP-binding cassette, sub-family A (ABC1), member 3	-0.395476	-5.50731	0.000436982	0.00419548
66307	Isoc1	isochorismatase domain containing 1	-0.765508	-5.50209	0.000439848	0.00421941
52463	Tet1	tet methylcytosine dioxygenase 1	-0.0751703	-5.49848	0.000441842	0.00423494
66291	Smim8	small integral membrane protein 8	-0.654545	-5.49608	0.000443168	0.00424406
17350	Mlh1	mutL homolog 1	-0.460765	-5.49011	0.000446496	0.00425961
66775	Hacd4	3-hydroxyacyl-CoA dehydratase 4	-0.307783	-5.48925	0.000446981	0.00425961
50907	Preb	prolactin regulatory element binding	-0.33462	-5.48684	0.000448332	0.00426821
22288	Utrn	utrophin	-0.686212	-5.48329	0.00045033	0.00427643
17122	Mxd4	Max dimerization protein 4	-0.817192	-5.47811	0.000453268	0.00429352
234311	Ddx60	DEAD (Asp-Glu-Ala-Asp) box polypeptide 60	-0.285019	-5.47593	0.00045451	0.00430168
73828	Dcaf4	DDB1 and CUL4 associated factor 4	-0.983021	-5.47335	0.000455982	0.00431102
74772	Atp13a2	ATPase type 13A2	-0.576786	-5.47287	0.000456259	0.00431102
14182	Fgfr1	fibroblast growth factor receptor 1	-0.618712	-5.47131	0.000457154	0.00431227
17436	Me1	malic enzyme 1, NADP(+)-dependent, cytosolic	-0.800362	-5.46875	0.000458624	0.00432186
19186	Psme1	proteasome (prosome, macropain) activator subunit 1 (PA28 alpha)	-0.632121	-5.46822	0.000458935	0.00432186
328092	Dtd2	D-tyrosyl-tRNA deacylase 2	-0.581994	-5.46503	0.000460779	0.00433561
11433	Acp5	acid phosphatase 5, tartrate resistant	-0.818819	-5.46317	0.000461854	0.00434212
319625	Galm	galactose mutarotase	-0.510817	-5.4573	0.000465279	0.00436401
72278	Ccpg1	cell cycle progression 1	-0.0980704	-5.4568	0.000465571	0.00436401
53871	Pkd2l2	polycystic kidney disease 2-like 2	-0.549666	-5.45653	0.000465726	0.00436401
100198	H6pd	hexose-6-phosphate dehydrogenase (glucose 1-dehydrogenase)	-0.74973	-5.45545	0.000466361	0.00436635
22031	Traf3	TNF receptor-associated factor 3	-0.387838	-5.44665	0.000471558	0.00440631
26457	Slc27a1	solute carrier family 27 (fatty acid transporter), member 1	-1.004	-5.44589	0.000472005	0.00440631
239719	Mrtfb	myocardin related transcription factor B	-0.501537	-5.44559	0.000472188	0.00440631
16848	Lfng	LFNG O-fucosylpeptide 3-beta-N-acetylglucosaminyltransferase	-0.558348	-5.43897	0.00047614	0.00443953
101772	Ano1	anoctamin 1, calcium activated chloride channel	-1.11234	-5.43131	0.000480763	0.00447525
15405	Hoxa9	homeobox A9	-0.183843	-5.41986	0.000487761	0.00451989
21351	Taldo1	transaldolase 1	-0.750557	-5.41841	0.000488658	0.00451989
16909	Lmo2	LIM domain only 2	-0.527423	-5.41825	0.000488756	0.00451989
111175	Pecr	peroxisomal trans-2-enoyl-CoA reductase	-0.928787	-5.41009	0.000493822	0.00455681
17305	Mfng	MFNG O-fucosylpeptide 3-beta-N-acetylglucosaminyltransferase	-0.689583	-5.40886	0.00049459	0.00455681
54353	Skap2	src family associated phosphoprotein 2	-0.83106	-5.40859	0.000494762	0.00455681
110417	Pigh	phosphatidylinositol glycan anchor biosynthesis, class H	-0.429276	-5.40615	0.000496287	0.00455951
110147	Ehmt2	euchromatic histone lysine N-methyltransferase 2	-0.426161	-5.40594	0.000496419	0.00455951
18120	Mrpl49	mitochondrial ribosomal protein L49	-0.796621	-5.40521	0.000496878	0.00455951
66273	Aamdc	adipogenesis associated Mth938 domain containing	-0.781684	-5.39873	0.000500969	0.00458041
15460	Hr	lysine demethylase and nuclear receptor corepressor	-0.48151	-5.39276	0.000504775	0.00460433
21841	Tia1	cytotoxic granule-associated RNA binding protein 1	-0.462715	-5.39271	0.000504807	0.00460433
17295	Met	met proto-oncogene	-0.566787	-5.39063	0.00050614	0.00461276
209378	Itih5	inter-alpha (globulin) inhibitor H5	-1.118	-5.38869	0.000507386	0.00461947
70423	Tspan15	tetraspanin 15	-0.813529	-5.38821	0.000507692	0.00461947
232536	Mrps35	mitochondrial ribosomal protein S35	-0.508786	-5.38508	0.000509714	0.00462738
68428	Steap3	STEAP family member 3	-0.489868	-5.38496	0.000509789	0.00462738
230761	Zfp362	zinc finger protein 362	-0.453461	-5.38309	0.000510997	0.00463091
104923	Adi1	acireductone dioxygenase 1	-0.596079	-5.37787	0.000514395	0.00465797
68058	Chd1l	chromodomain helicase DNA binding protein 1-like	-0.564366	-5.37528	0.000516088	0.00466317
69188	Kmt2e	lysine (K)-specific methyltransferase 2E	-0.273346	-5.37518	0.000516156	0.00466317
67636	Etfrf1	electron transfer flavoprotein regulatory factor 1	-0.41418	-5.3751	0.000516206	0.00466317
57810	Cdon	cell adhesion molecule-related/down-regulated by oncogenes	-0.575013	-5.36983	0.000519674	0.00468701
73836	Slc35b2	solute carrier family 35, member B2	-0.581848	-5.36796	0.000520908	0.00469279
381629	Atraid	all-trans retinoic acid induced differentiation factor	-0.664307	-5.3676	0.000521145	0.00469279
68729	Trim37	tripartite motif-containing 37	-0.37871	-5.35633	0.000528667	0.00474932
15213	Hey1	hairy/enhancer-of-split related with YRPW motif 1	-0.354252	-5.35631	0.000528682	0.00474932
270210	Zfp651	zinc finger protein 651	-0.582591	-5.35144	0.000531964	0.00476744
58206	Zbtb32	zinc finger and BTB domain containing 32	-0.523895	-5.34843	0.000534005	0.0047733
20778	Scarb1	scavenger receptor class B, member 1	-0.533244	-5.34786	0.000534393	0.0047733
70791	Hars2	histidyl-tRNA synthetase 2	-0.858209	-5.34686	0.000535075	0.0047733
18618	Pemt	phosphatidylethanolamine N-methyltransferase	-0.32832	-5.34675	0.000535149	0.0047733
14211	Smc2	structural maintenance of chromosomes 2	-0.32853	-5.34539	0.000536079	0.00477782
66241	Tmem9	transmembrane protein 9	-0.666714	-5.34245	0.000538088	0.00478818
72392	Tmem175	transmembrane protein 175	-0.492289	-5.33972	0.000539968	0.0047972
109689	Arrb1	arrestin, beta 1	-0.528229	-5.33728	0.000541647	0.00480473
215615	Rnpep	arginyl aminopeptidase (aminopeptidase B)	-0.915268	-5.33221	0.000545157	0.00481713
76687	Spcs3	signal peptidase complex subunit 3 homolog (S. cerevisiae)	-0.398422	-5.33176	0.000545469	0.00481713
116748	Lsm10	U7 snRNP-specific Sm-like protein LSM10	-0.990675	-5.33157	0.000545601	0.00481713
70839	P2ry12	purinergic receptor P2Y, G-protein coupled 12	-0.424108	-5.33033	0.00054647	0.00482097
74104	Abcb6	ATP-binding cassette, sub-family B (MDR/TAP), member 6	-0.497786	-5.32744	0.000548485	0.00482752
14012	Mpzl2	myelin protein zero-like 2	-0.880883	-5.3061	0.000563644	0.00494347
12306	Anxa2	annexin A2	-0.957206	-5.30493	0.000564491	0.00494347
233806	Tmem159	transmembrane protein 159	-0.717677	-5.30471	0.000564648	0.00494347
55960	Ebag9	estrogen receptor-binding fragment-associated gene 9	-0.465671	-5.30461	0.000564718	0.00494347
21417	Zeb1	zinc finger E-box binding homeobox 1	-0.591464	-5.30303	0.000565861	0.00494582
209131	Snx30	sorting nexin family member 30	-0.450723	-5.29941	0.000568493	0.00496498
74326	Hnrnpr	heterogeneous nuclear ribonucleoprotein R	-0.35192	-5.28319	0.000580429	0.00504973
20340	Glg1	golgi apparatus protein 1	-0.370553	-5.28246	0.000580975	0.00505059
14248	Flii	flightless I actin binding protein	-0.557318	-5.27961	0.000583102	0.00506374
109552	Sri	sorcin	-0.502532	-5.27923	0.000583382	0.00506374
16835	Ldlr	low density lipoprotein receptor	-1.03639	-5.27615	0.000585694	0.00507601
71843	R3hcc1	R3H domain and coiled-coil containing 1	-0.436207	-5.27411	0.000587227	0.00508541
107569	Nt5c3	5'-nucleotidase, cytosolic III	-0.257118	-5.26955	0.000590676	0.00510745
67200	Ccdc77	coiled-coil domain containing 77	-0.228115	-5.26873	0.000591301	0.00510895
84112	Sucnr1	succinate receptor 1	-1.15715	-5.26251	0.000596046	0.00513519
20452	St8sia4	ST8 alpha-N-acetyl-neuraminide alpha-2,8-sialyltransferase 4	-0.751552	-5.26237	0.000596154	0.00513519
18806	Pld2	phospholipase D2	-0.325787	-5.25921	0.000598574	0.00515211
72543	Mvb12b	multivesicular body subunit 12B	-0.366092	-5.25806	0.000599458	0.0051558
66970	Ssbp2	single-stranded DNA binding protein 2	-0.454296	-5.25585	0.000601165	0.00516527
56213	Htra1	HtrA serine peptidase 1	-0.896981	-5.25463	0.000602111	0.00516682
56177	Olfm1	olfactomedin 1	-0.21742	-5.25314	0.000603265	0.0051728
20911	Stxbp2	syntaxin binding protein 2	-0.607444	-5.25168	0.000604399	0.0051786
102339	Cog4	component of oligomeric golgi complex 4	-0.648867	-5.24336	0.000610913	0.0052186
14069	F8	coagulation factor VIII	-0.22439	-5.233	0.000619118	0.00527195
72479	Hsdl2	hydroxysteroid dehydrogenase like 2	-0.444239	-5.23278	0.000619294	0.00527195
14104	Fasn	fatty acid synthase	-0.777981	-5.23254	0.000619489	0.00527195
329910	Acot11	acyl-CoA thioesterase 11	-1.12967	-5.22899	0.000622332	0.0052908
329735	4933431E20Rik	RIKEN cDNA 4933431E20 gene	-0.225507	-5.2286	0.00062264	0.0052908
66248	Alg5	asparagine-linked glycosylation 5 (dolichyl-phosphate beta-glucosyltransferase)	-0.619429	-5.22325	0.00062696	0.00531952
67299	Dock7	dedicator of cytokinesis 7	-0.452482	-5.21654	0.00063241	0.00535371
72121	Dennd2d	DENN/MADD domain containing 2D	-0.447717	-5.20754	0.000639809	0.00540746
70804	Pgrmc2	progesterone receptor membrane component 2	-0.496046	-5.19849	0.000647348	0.00545974
12695	Patj	PATJ, crumbs cell polarity complex component	-0.111808	-5.19067	0.000653937	0.00549898
65970	Lima1	LIM domain and actin binding 1	-0.4568	-5.18571	0.000658146	0.00552269
100129	Gpr153	G protein-coupled receptor 153	-0.413969	-5.18454	0.000659151	0.00552269
110173	Manba	mannosidase, beta A, lysosomal	-0.378326	-5.1839	0.000659692	0.00552269
66049	Rogdi	rogdi homolog	-0.734345	-5.18356	0.000659982	0.00552269
52064	Coq5	coenzyme Q5 methyltransferase	-0.641289	-5.18326	0.000660246	0.00552269
18792	Plau	plasminogen activator, urokinase	-0.800584	-5.18316	0.00066033	0.00552269
15216	Hfe	homeostatic iron regulator	-0.802994	-5.1826	0.000660806	0.00552269
54616	Extl3	exostoses (multiple)-like 3	-0.634714	-5.18219	0.00066116	0.00552269
110351	Rap1gap	Rap1 GTPase-activating protein	-0.687037	-5.18066	0.000662471	0.00552955
99152	Anapc2	anaphase promoting complex subunit 2	-0.35695	-5.17944	0.000663523	0.00553425
66079	Tmem42	transmembrane protein 42	-0.429158	-5.17854	0.000664295	0.0055366
83922	Cep41	centrosomal protein 41	-0.234354	-5.17607	0.000666428	0.00554213
64297	Gprc5b	G protein-coupled receptor, family C, group 5, member B	-0.920426	-5.1723	0.000669696	0.00555705
67144	Lrrc40	leucine rich repeat containing 40	-0.433673	-5.16967	0.000671982	0.00557193
67005	Polr3k	polymerase (RNA) III (DNA directed) polypeptide K	-0.539051	-5.16339	0.000677486	0.00560935
26420	Mapk9	mitogen-activated protein kinase 9	-0.491497	-5.15931	0.000681091	0.00563095
19280	Ptprs	protein tyrosine phosphatase, receptor type, S	-0.450625	-5.15765	0.000682562	0.00563487
78558	Htra3	HtrA serine peptidase 3	-0.941153	-5.15476	0.000685128	0.00565193
74519	Cyp2j9	cytochrome P450, family 2, subfamily j, polypeptide 9	-0.42202	-5.15307	0.000686639	0.00566027
14163	Fgd1	FYVE, RhoGEF and PH domain containing 1	-0.313453	-5.14891	0.000690367	0.00568686
230872	Crocc	ciliary rootlet coiled-coil, rootletin	-0.212284	-5.13894	0.000699383	0.00574856
11980	Atp8a1	ATPase, aminophospholipid transporter (APLT), class I, type 8A, member 1	-0.661628	-5.13807	0.000700183	0.00574863
68539	Tmem109	transmembrane protein 109	-0.846278	-5.13681	0.000701327	0.005752
14043	Ext2	exostoses (multiple) 2	-0.343476	-5.13404	0.00070387	0.00576867
383295	Ypel5	yippee like 5	-0.878123	-5.13148	0.000706215	0.0057837
103268	Cep57l1	centrosomal protein 57-like 1	-0.447247	-5.12984	0.000707734	0.00579195
27999	Fam3c	family with sequence similarity 3, member C	-0.696457	-5.12739	0.000709993	0.00580623
18639	Pfkfb1	6-phosphofructo-2-kinase/fructose-2,6-biphosphatase 1	-0.689297	-5.12641	0.0007109	0.00580945
26464	Vnn3	vanin 3	-0.62297	-5.11457	0.000721972	0.00589141
110094	Phka2	phosphorylase kinase alpha 2	-0.617653	-5.11345	0.000723033	0.00589582
17120	Mad1l1	MAD1 mitotic arrest deficient 1-like 1	-0.368184	-5.10599	0.000730112	0.00594925
12144	Blm	Bloom syndrome, RecQ like helicase	-0.229044	-5.10133	0.000734575	0.00598131
20351	Sema4a	sema domain, immunoglobulin domain (Ig), transmembrane domain (TM) and short cytoplasmic domain, (semaphorin) 4A	-0.817238	-5.10022	0.000735651	0.00598299
67282	Washc3	WASH complex subunit 3	-0.477867	-5.0967	0.00073904	0.00599823
64540	Tspan4	tetraspanin 4	-0.974146	-5.09596	0.000739756	0.00599823
12009	Cep131	centrosomal protein 131	-0.396815	-5.09588	0.000739835	0.00599823
74055	Plce1	phospholipase C, epsilon 1	-0.596277	-5.08902	0.000746516	0.00604373
234664	Nae1	NEDD8 activating enzyme E1 subunit 1	-0.394709	-5.08612	0.000749353	0.00606236
380712	Tlcd2	TLC domain containing 2	-0.849299	-5.07871	0.000756663	0.00611355
50776	Polg2	polymerase (DNA directed), gamma 2, accessory subunit	-0.414799	-5.07678	0.000758581	0.00612387
13857	Epor	erythropoietin receptor	-0.714137	-5.07494	0.000760413	0.00613429
14158	Fer	fer (fms/fps related) protein kinase	-0.553175	-5.07259	0.000762763	0.00614886
13360	Dhcr7	7-dehydrocholesterol reductase	-0.71534	-5.06815	0.00076722	0.00618039
18131	Notch3	notch 3	-0.661553	-5.06108	0.000774382	0.0062295
100900	Hscb	HscB iron-sulfur cluster co-chaperone	-0.911861	-5.05945	0.000776037	0.00623808
56295	Higd1a	HIG1 domain family, member 1A	-0.376033	-5.05763	0.000777902	0.00623977
20466	Sin3a	transcriptional regulator, SIN3A (yeast)	-0.615725	-5.05707	0.000778474	0.00623993
21853	Timeless	timeless circadian clock 1	-0.314208	-5.0564	0.000779163	0.00624103
69234	Zfp688	zinc finger protein 688	-0.332467	-5.05471	0.000780889	0.00625043
69834	Rab43	RAB43, member RAS oncogene family	-0.443151	-5.05333	0.000782311	0.00625738
23873	Faim	Fas apoptotic inhibitory molecule	-0.678488	-5.05214	0.000783535	0.00626274
12477	Ctla4	cytotoxic T-lymphocyte-associated protein 4	-0.213223	-5.04859	0.000787202	0.00628761
12447	Ccne1	cyclin E1	-0.388355	-5.04778	0.000788045	0.0062899
14362	Fzd1	frizzled class receptor 1	-0.364986	-5.04723	0.000788607	0.00628995
70511	Eef2kmt	eukaryotic elongation factor 2 lysine methyltransferase	-0.817896	-5.0456	0.0007903	0.00629458
110948	Hlcs	holocarboxylase synthetase (biotin- [propriony-Coenzyme A-carboxylase (ATP-hydrolysing)] ligase)	-0.426833	-5.04416	0.000791803	0.00630211
73739	Cby1	chibby family member 1, beta catenin antagonist	-0.921923	-5.0298	0.000806924	0.00640892
100929	Tyw1	tRNA-yW synthesizing protein 1 homolog (S. cerevisiae)	-0.449732	-5.02552	0.000811495	0.00643619
215789	Phactr2	phosphatase and actin regulator 2	-0.287844	-5.02399	0.000813126	0.00644228
68082	Dusp19	dual specificity phosphatase 19	-0.744725	-5.02374	0.000813401	0.00644228
246710	Rhobtb2	Rho-related BTB domain containing 2	-0.540538	-5.0088	0.000829604	0.00655225
17532	Mras	muscle and microspikes RAS	-0.349684	-5.00812	0.000830354	0.0065536
11737	Anp32a	acidic (leucine-rich) nuclear phosphoprotein 32 family, member A	-0.762545	-5.00484	0.000833957	0.00657744
65105	Arl6ip4	ADP-ribosylation factor-like 6 interacting protein 4	-0.495873	-5.00333	0.000835618	0.00658136
55983	Pdzrn3	PDZ domain containing RING finger 3	-0.704798	-4.99905	0.00084037	0.00660959
68458	Ppp1r14a	protein phosphatase 1, regulatory inhibitor subunit 14A	-0.764894	-4.99619	0.000843555	0.00663003
74153	Uba7	ubiquitin-like modifier activating enzyme 7	-0.369287	-4.99422	0.000845756	0.00664271
12348	Car11	carbonic anhydrase 11	-0.589943	-4.99291	0.000847219	0.00664497
18029	Nfic	nuclear factor I/C	-0.675166	-4.98896	0.000851665	0.00667521
69051	Pycr2	pyrroline-5-carboxylate reductase family, member 2	-0.577082	-4.9877	0.000853088	0.00668174
67484	Eepd1	endonuclease/exonuclease/phosphatase family domain containing 1	-0.811349	-4.98622	0.00085476	0.0066902
71151	Eri2	exoribonuclease 2	-0.326062	-4.98083	0.000860882	0.0067288
71665	Fuca1	fucosidase, alpha-L- 1, tissue	-0.488398	-4.97639	0.000865967	0.00675896
15234	Hgf	hepatocyte growth factor	-0.567464	-4.97432	0.00086835	0.0067638
69216	Svbp	small vasohibin binding protein	-0.631672	-4.96984	0.000873522	0.0067994
16404	Itga7	integrin alpha 7	-0.897602	-4.96545	0.000878628	0.00682615
18551	Pcsk4	proprotein convertase subtilisin/kexin type 4	-0.500921	-4.96533	0.000878768	0.00682615
219140	Spata13	spermatogenesis associated 13	-0.411087	-4.96274	0.000881791	0.00684492
22367	Vrk1	vaccinia related kinase 1	-0.389147	-4.96046	0.000884472	0.00686103
67847	Sncaip	synuclein, alpha interacting protein (synphilin)	-0.238344	-4.95884	0.00088638	0.00687112
56807	Scamp5	secretory carrier membrane protein 5	-0.670247	-4.95802	0.000887347	0.0068739
12041	Bckdk	branched chain ketoacid dehydrogenase kinase	-0.596746	-4.95572	0.000890058	0.00689018
223453	Dap	death-associated protein	-0.733577	-4.95519	0.00089069	0.00689035
109093	Rars2	arginyl-tRNA synthetase 2, mitochondrial	-0.583002	-4.95174	0.00089478	0.00691254
16565	Kif21b	kinesin family member 21B	-0.0587895	-4.94977	0.000897133	0.00692599
18747	Prkaca	protein kinase, cAMP dependent, catalytic, alpha	-0.732112	-4.94575	0.00090194	0.00695835
74043	Pex26	peroxisomal biogenesis factor 26	-0.568419	-4.94493	0.000902923	0.00696086
17181	Matn2	matrilin 2	-0.778366	-4.94394	0.000904112	0.00696086
319757	Smo	smoothened, frizzled class receptor	-0.489624	-4.94064	0.000908094	0.00698677
14678	Gnai2	guanine nucleotide binding protein (G protein), alpha inhibiting 2	-0.675761	-4.93869	0.000910453	0.00699664
217031	Tada2a	transcriptional adaptor 2A	-0.479167	-4.93805	0.000911233	0.00699664
22174	Tyro3	TYRO3 protein tyrosine kinase 3	-0.0727585	-4.93597	0.000913751	0.00701121
240665	Ccnj	cyclin J	-0.383843	-4.92946	0.000921717	0.00705797
19301	Pxmp2	peroxisomal membrane protein 2	-0.676343	-4.92451	0.000927816	0.00709027
14381	G6pdx	glucose-6-phosphate dehydrogenase X-linked	-0.491378	-4.92283	0.000929905	0.0070966
13595	Ebp	phenylalkylamine Ca2+ antagonist (emopamil) binding protein	-0.641371	-4.92238	0.000930453	0.0070966
117167	Steap4	STEAP family member 4	-1.65181	-4.91683	0.000937376	0.00714402
12988	Csk	c-src tyrosine kinase	-0.480907	-4.91499	0.00093968	0.00715675
117591	Slc2a9	solute carrier family 2 (facilitated glucose transporter), member 9	-0.304845	-4.90953	0.000946559	0.0072043
246102	Rttn	rotatin	-0.400744	-4.90848	0.000947877	0.00720948
170770	Bbc3	BCL2 binding component 3	-0.701148	-4.90594	0.000951108	0.00722509
15488	Hsd17b4	hydroxysteroid (17-beta) dehydrogenase 4	-0.509766	-4.90261	0.000955342	0.00724676
56470	Rgs19	regulator of G-protein signaling 19	-0.464848	-4.90156	0.000956685	0.00725208
57813	Tk2	thymidine kinase 2, mitochondrial	-0.669608	-4.89296	0.000967757	0.00732619
12298	Cacnb4	calcium channel, voltage-dependent, beta 4 subunit	-0.116083	-4.89143	0.000969745	0.00733633
18127	Nos3	nitric oxide synthase 3, endothelial cell	-0.64741	-4.88378	0.00097972	0.00739695
21892	Tll1	tolloid-like	-0.0941812	-4.88206	0.000981987	0.00740424
106529	Tecr	trans-2,3-enoyl-CoA reductase	-0.688951	-4.88137	0.000982895	0.00740484
68235	Mturn	maturin, neural progenitor differentiation regulator homolog (Xenopus)	-0.592805	-4.87923	0.00098571	0.00741249
13990	Smarcad1	SWI/SNF-related, matrix-associated actin-dependent regulator of chromatin, subfamily a, containing DEAD/H box 1	-0.209793	-4.87714	0.000988479	0.00742837
74646	Spsb1	splA/ryanodine receptor domain and SOCS box containing 1	-0.618822	-4.8704	0.000997446	0.00748581
19055	Ppp3ca	protein phosphatase 3, catalytic subunit, alpha isoform	-0.386315	-4.86751	0.00100133	0.00750501
105445	Dock9	dedicator of cytokinesis 9	-0.761246	-4.86567	0.00100381	0.00751858
235135	Tmem45b	transmembrane protein 45b	-1.16336	-4.86514	0.00100451	0.00751887
67997	Ddx59	DEAD (Asp-Glu-Ala-Asp) box polypeptide 59	-0.675956	-4.863	0.00100741	0.00753558
15199	Hebp1	heme binding protein 1	-0.830663	-4.86047	0.00101084	0.00755122
71790	Anxa9	annexin A9	-0.34172	-4.85998	0.0010115	0.00755122
50997	Mpp2	membrane protein, palmitoylated 2 (MAGUK p55 subfamily member 2)	-0.501255	-4.85735	0.00101508	0.00757292
54446	Nfat5	nuclear factor of activated T cells 5	-0.311694	-4.85628	0.00101654	0.00757884
269702	Mphosph9	M-phase phosphoprotein 9	-0.313971	-4.85374	0.00102002	0.00759379
68017	Mrm2	mitochondrial rRNA methyltransferase 2	-0.706264	-4.85334	0.00102056	0.00759379
22154	Tubb5	tubulin, beta 5 class I	-0.583841	-4.84212	0.00103608	0.00767392
18032	Nfix	nuclear factor I/X	-0.601224	-4.83748	0.00104257	0.00771691
79362	Bhlhe41	basic helix-loop-helix family, member e41	-0.468942	-4.83409	0.00104733	0.00774214
26416	Mapk14	mitogen-activated protein kinase 14	-0.758852	-4.83408	0.00104734	0.00774214
16438	Itpr1	inositol 1,4,5-trisphosphate receptor 1	-0.731616	-4.83148	0.00105102	0.00776426
140483	Hnmt	histamine N-methyltransferase	-0.763753	-4.82741	0.0010568	0.00779673
67201	Glod4	glyoxalase domain containing 4	-0.579512	-4.81736	0.00107122	0.00789285
17188	Maz	MYC-associated zinc finger protein (purine-binding transcription factor)	-0.633394	-4.80858	0.00108399	0.00797653
22619	Siae	sialic acid acetylesterase	-0.756793	-4.80455	0.0010899	0.0080148
68475	Ssna1	SS nuclear autoantigen 1	-0.697037	-4.80199	0.00109368	0.00803739
22033	Traf5	TNF receptor-associated factor 5	-0.318188	-4.79887	0.00109831	0.0080557
63828	Fn3k	fructosamine 3 kinase	-0.546348	-4.79828	0.00109918	0.00805687
27369	Dguok	deoxyguanosine kinase	-0.775862	-4.79749	0.00110035	0.0080602
142688	Asb13	ankyrin repeat and SOCS box-containing 13	-0.457971	-4.79586	0.00110278	0.00806759
26447	Poli	polymerase (DNA directed), iota	-0.393719	-4.79501	0.00110405	0.0080716
19714	Rev3l	REV3 like, DNA directed polymerase zeta catalytic subunit	-0.417005	-4.78664	0.00111662	0.008153
68813	Dock5	dedicator of cytokinesis 5	-0.457773	-4.78546	0.00111841	0.00816081
54447	Asah2	N-acylsphingosine amidohydrolase 2	-0.447913	-4.77672	0.00113173	0.00824728
70127	Dpf3	D4, zinc and double PHD fingers, family 3	-0.632616	-4.77553	0.00113356	0.00825001
227102	Ormdl1	ORM1-like 1 (S. cerevisiae)	-0.336705	-4.77303	0.0011374	0.0082727
15353	Hmg20b	high mobility group 20B	-0.52742	-4.7679	0.00114534	0.0083187
231724	Rad9b	RAD9 checkpoint clamp component B	-0.598419	-4.76752	0.00114594	0.0083187
223918	Spryd3	SPRY domain containing 3	-0.66543	-4.7647	0.00115033	0.00834521
15183	Hdac3	histone deacetylase 3	-0.546923	-4.7612	0.0011558	0.00836959
214444	Cdk5rap2	CDK5 regulatory subunit associated protein 2	-0.239475	-4.76113	0.00115591	0.00836959
73327	Pradc1	protease-associated domain containing 1	-0.570633	-4.76021	0.00115736	0.00837474
27883	Tango2	transport and golgi organization 2	-0.395365	-4.75826	0.00116043	0.00838567
71890	Mad2l2	MAD2 mitotic arrest deficient-like 2	-0.579203	-4.75759	0.00116147	0.00838567
12122	Bid	BH3 interacting domain death agonist	-0.284198	-4.75588	0.00116418	0.00839723
16351	Ipp	IAP promoted placental gene	-0.476937	-4.75531	0.00116509	0.00839842
11518	Add1	adducin 1 (alpha)	-0.58546	-4.75167	0.00117085	0.00843219
114229	Kiss1r	KISS1 receptor	-0.218701	-4.75141	0.00117126	0.00843219
380753	Atxn7l1	ataxin 7-like 1	-0.225943	-4.74689	0.00117848	0.00847874
21917	Tmpo	thymopoietin	-0.489153	-4.74062	0.00118857	0.00854187
18074	Nid2	nidogen 2	-0.507087	-4.73807	0.0011927	0.00855754
80891	Fcrls	Fc receptor-like S, scavenger receptor	-0.498365	-4.73176	0.00120299	0.0086167
78688	Nol3	nucleolar protein 3 (apoptosis repressor with CARD domain)	-0.526652	-4.73035	0.00120531	0.00862562
230793	Ahdc1	AT hook, DNA binding motif, containing 1	-0.568576	-4.73007	0.00120576	0.00862562
12326	Camk4	calcium/calmodulin-dependent protein kinase IV	-0.0511741	-4.72923	0.00120715	0.00863014
54635	Pdgfc	platelet-derived growth factor, C polypeptide	-0.471367	-4.72838	0.00120854	0.00863463
12408	Cbr1	carbonyl reductase 1	-0.704573	-4.72446	0.00121502	0.00867279
64817	Svep1	sushi, von Willebrand factor type A, EGF and pentraxin domain containing 1	-0.886082	-4.72418	0.00121548	0.00867279
105446	Gmpr2	guanosine monophosphate reductase 2	-0.74191	-4.72375	0.00121619	0.00867279
72313	Fryl	FRY like transcription coactivator	-0.52759	-4.72167	0.00121964	0.00868651
53416	Stk39	serine/threonine kinase 39	-0.745074	-4.71556	0.00122985	0.00874817
216853	Wrap53	WD repeat containing, antisense to Trp53	-0.665812	-4.70954	0.00123999	0.00881477
117149	Tirap	toll-interleukin 1 receptor (TIR) domain-containing adaptor protein	-0.455281	-4.70695	0.00124438	0.00883489
56752	Aldh9a1	aldehyde dehydrogenase 9, subfamily A1	-0.45229	-4.70238	0.00125216	0.00888454
17978	Ncoa2	nuclear receptor coactivator 2	-0.309725	-4.70141	0.00125383	0.00889081
170752	Bco2	beta-carotene oxygenase 2	-0.226346	-4.69637	0.00126248	0.00894655
268395	Mpg	N-methylpurine-DNA glycosylase	-0.373887	-4.69396	0.00126665	0.00897048
16564	Kif21a	kinesin family member 21A	-0.579274	-4.69228	0.00126957	0.00898553
100182	Akna	AT-hook transcription factor	-0.191969	-4.69043	0.00127279	0.00899704
192654	Pla2g15	phospholipase A2, group XV	-0.862973	-4.68972	0.00127402	0.00900012
66102	Cxcl16	chemokine (C-X-C motif) ligand 16	-0.359566	-4.68896	0.00127534	0.00900137
74610	Abcb8	ATP-binding cassette, sub-family B (MDR/TAP), member 8	-0.661486	-4.68698	0.00127882	0.00901708
72729	Cdc42se2	CDC42 small effector 2	-0.576682	-4.68569	0.00128107	0.00901993
67967	Pold3	polymerase (DNA-directed), delta 3, accessory subunit	-0.354099	-4.68257	0.00128655	0.00904591
13637	Efna2	ephrin A2	-0.314042	-4.68237	0.0012869	0.00904591
18854	Pml	promyelocytic leukemia	-0.344793	-4.68035	0.00129047	0.00906536
230996	9430015G10Rik	RIKEN cDNA 9430015G10 gene	-0.28364	-4.67934	0.00129224	0.00907215
68401	G6pc3	glucose 6 phosphatase, catalytic, 3	-0.450415	-4.67767	0.00129521	0.00908735
98432	Phlpp1	PH domain and leucine rich repeat protein phosphatase 1	-0.449902	-4.6755	0.00129906	0.00910305
382236	Brwd3	bromodomain and WD repeat domain containing 3	-0.207856	-4.67437	0.00130107	0.00911152
54711	Plagl2	pleiomorphic adenoma gene-like 2	-0.16165	-4.67233	0.00130472	0.00912538
101437	Dhx32	DEAH (Asp-Glu-Ala-His) box polypeptide 32	-0.729391	-4.67191	0.00130547	0.00912538
12892	Cpox	coproporphyrinogen oxidase	-0.529592	-4.66868	0.00131126	0.00915376
72083	Mzt2	mitotic spindle organizing protein 2	-0.702268	-4.66829	0.00131196	0.00915376
14231	Fkbp7	FK506 binding protein 7	-0.409652	-4.66163	0.00132399	0.00921163
72055	Slc38a10	solute carrier family 38, member 10	-0.905718	-4.66145	0.00132432	0.00921163
17268	Meis1	Meis homeobox 1	-0.302396	-4.66061	0.00132586	0.00921663
17777	Mttp	microsomal triglyceride transfer protein	-0.481007	-4.66001	0.00132695	0.00921852
14760	Gpr19	G protein-coupled receptor 19	-0.332912	-4.65623	0.00133384	0.00925008
100434	Slc44a1	solute carrier family 44, member 1	-0.539335	-4.65603	0.00133422	0.00925008
14872	Gstt2	glutathione S-transferase, theta 2	-0.686344	-4.65573	0.00133476	0.00925008
80911	Acox3	acyl-Coenzyme A oxidase 3, pristanoyl	-0.570141	-4.65157	0.0013424	0.00929736
107566	Arl2bp	ADP-ribosylation factor-like 2 binding protein	-0.602474	-4.64658	0.00135163	0.00935552
27055	Fkbp9	FK506 binding protein 9	-0.766845	-4.64534	0.00135394	0.00936014
100504715	Tmppe	transmembrane protein with metallophosphoesterase domain	-0.189271	-4.6451	0.00135439	0.00936014
20847	Stat2	signal transducer and activator of transcription 2	-0.575105	-4.64138	0.00136133	0.00939392
227700	Sh3glb2	SH3-domain GRB2-like endophilin B2	-0.797442	-4.63951	0.00136484	0.00940093
56749	Dhodh	dihydroorotate dehydrogenase	-0.554686	-4.636	0.00137143	0.00944061
71435	Arhgap21	Rho GTPase activating protein 21	-0.338247	-4.63403	0.00137516	0.0094548
17294	Mest	mesoderm specific transcript	-0.39866	-4.63202	0.00137898	0.00946947
18519	Kat2b	K(lysine) acetyltransferase 2B	-0.667219	-4.63122	0.00138049	0.00947133
13617	Ednra	endothelin receptor type A	-0.254646	-4.62777	0.00138706	0.00950194
27419	Naglu	alpha-N-acetylglucosaminidase (Sanfilippo disease IIIB)	-0.530156	-4.62393	0.00139442	0.00954656
14681	Gnao1	guanine nucleotide binding protein, alpha O	-0.502832	-4.62167	0.00139877	0.0095705
67475	Ero1lb	ERO1-like beta (S. cerevisiae)	-0.362667	-4.61962	0.00140272	0.00959175
228852	Ppp1r16b	protein phosphatase 1, regulatory subunit 16B	-0.28353	-4.60853	0.00142434	0.00971609
234404	Nxnl1	nucleoredoxin-like 1	-0.254829	-4.6079	0.00142557	0.00971864
330064	Slc5a6	solute carrier family 5 (sodium-dependent vitamin transporter), member 6	-0.746863	-4.59844	0.0014443	0.00984039
72136	Chst14	carbohydrate sulfotransferase 14	-0.346752	-4.59736	0.00144647	0.00984923
245828	Trappc1	trafficking protein particle complex 1	-0.501348	-4.59575	0.00144969	0.00986092
56541	Habp4	hyaluronic acid binding protein 4	-0.34851	-4.59563	0.00144993	0.00986092
11746	Anxa4	annexin A4	-0.486407	-4.5933	0.0014546	0.00988675
12879	Cys1	cystin 1	-0.20187	-4.59276	0.00145568	0.00988785
55932	Gbp3	guanylate binding protein 3	-1.18506	-4.59235	0.00145651	0.00988785
15064	Mr1	major histocompatibility complex, class I-related	-0.691059	-4.59044	0.00146036	0.00990205
64082	Popdc2	popeye domain containing 2	-1.19637	-4.58987	0.00146151	0.00990394
14862	Gstm1	glutathione S-transferase, mu 1	-0.538935	-4.5894	0.00146247	0.00990448
72284	LTO1	ABCE maturation factor	-0.367628	-4.58882	0.00146363	0.00990643
66176	Nat9	N-acetyltransferase 9 (GCN5-related, putative)	-0.575831	-4.58571	0.00146994	0.00992909
75292	Prkd3	protein kinase D3	-0.47836	-4.58544	0.00147049	0.00992909
21982	Tmem165	transmembrane protein 165	-0.323399	-4.57734	0.00148707	0.0100203
243771	Parp12	poly (ADP-ribose) polymerase family, member 12	-0.755823	-4.57668	0.00148843	0.0100203
54122	Uevld	UEV and lactate/malate dehyrogenase domains	-0.300085	-4.5739	0.00149416	0.010047
227801	Dennd1a	DENN/MADD domain containing 1A	-0.353648	-4.57075	0.0015007	0.0100789
54525	Syt7	synaptotagmin VII	-0.225223	-4.56102	0.00152105	0.0101975
66952	2310030G06Rik	RIKEN cDNA 2310030G06 gene	-0.512585	-4.55598	0.00153174	0.010263
20977	Syp	synaptophysin	-0.30905	-4.55229	0.0015396	0.0102972
12350	Car3	carbonic anhydrase 3	-0.901396	-4.5514	0.0015415	0.0102979
212933	Pm20d1	peptidase M20 domain containing 1	-0.64765	-4.55009	0.0015443	0.010308
12333	Capn1	calpain 1	-0.52006	-4.54983	0.00154486	0.010308
16499	Kcnab3	potassium voltage-gated channel, shaker-related subfamily, beta member 3	-0.349056	-4.549	0.00154664	0.010308
233575	Pgap2	post-GPI attachment to proteins 2	-0.442288	-4.54899	0.00154666	0.010308
232089	Elmod3	ELMO/CED-12 domain containing 3	-0.819231	-4.54816	0.00154844	0.0103138
75541	Nat8f4	N-acetyltransferase 8 (GCN5-related) family member 4	-0.246294	-4.54713	0.00155066	0.0103225
14747	Cmklr1	chemokine-like receptor 1	-0.478515	-4.54646	0.00155211	0.010323
67198	Spats2l	spermatogenesis associated, serine-rich 2-like	-0.117143	-4.54485	0.00155558	0.0103309
19122	Prnp	prion protein	-1.12437	-4.54386	0.00155773	0.0103392
103199	Fig4	FIG4 phosphoinositide 5-phosphatase	-0.686043	-4.54254	0.00156059	0.010352
68177	Ebpl	emopamil binding protein-like	-0.538311	-4.54008	0.00156592	0.0103813
72065	Rap2c	RAP2C, member of RAS oncogene family	-0.232225	-4.538	0.00157046	0.0103946
53603	Tslp	thymic stromal lymphopoietin	-0.192939	-4.5379	0.00157069	0.0103946
20680	Sox7	SRY (sex determining region Y)-box 7	-0.55261	-4.5339	0.00157942	0.010445
80901	Cxcr6	chemokine (C-X-C motif) receptor 6	-0.522818	-4.53357	0.00158015	0.010445
23937	Mab21l2	mab-21-like 2	-0.393563	-4.5327	0.00158206	0.0104506
67119	Ccdc159	coiled-coil domain containing 159	-0.608374	-4.53235	0.00158284	0.0104506
66616	Snx9	sorting nexin 9	-0.545819	-4.52911	0.00158999	0.0104917
18972	Pold2	polymerase (DNA directed), delta 2, regulatory subunit	-0.615698	-4.52524	0.00159858	0.0105305
67615	Ube2r2	ubiquitin-conjugating enzyme E2R 2	-0.431335	-4.52513	0.00159882	0.0105305
19285	Cavin1	caveolae associated 1	-0.766968	-4.52478	0.0015996	0.0105305
14311	Cidec	cell death-inducing DFFA-like effector c	-0.689373	-4.52378	0.00160183	0.010533
18126	Nos2	nitric oxide synthase 2, inducible	-0.23558	-4.52269	0.00160427	0.0105429
67739	Slc48a1	solute carrier family 48 (heme transporter), member 1	-0.710558	-4.51851	0.00161363	0.0105921
17161	Maoa	monoamine oxidase A	-0.375863	-4.51772	0.00161541	0.0105976
16889	Lipa	lysosomal acid lipase A	-0.626076	-4.51456	0.00162253	0.0106316
17540	Mrvi1	MRV integration site 1	-0.185817	-4.51417	0.00162341	0.0106316
106861	Abhd3	abhydrolase domain containing 3	-0.38245	-4.51193	0.00162848	0.0106524
56748	Nfu1	NFU1 iron-sulfur cluster scaffold	-0.293326	-4.49948	0.00165701	0.010821
69920	Polr2i	polymerase (RNA) II (DNA directed) polypeptide I	-0.683662	-4.49943	0.00165711	0.010821
15394	Hoxa1	homeobox A1	-0.335107	-4.49448	0.00166861	0.010875
24060	Slc35a1	solute carrier family 35 (CMP-sialic acid transporter), member 1	-0.520779	-4.4944	0.00166879	0.010875
30944	Zfp354c	zinc finger protein 354C	-0.244787	-4.49421	0.00166923	0.010875
71279	Slc29a3	solute carrier family 29 (nucleoside transporters), member 3	-0.269158	-4.4915	0.00167556	0.01091
14677	Gnai1	guanine nucleotide binding protein (G protein), alpha inhibiting 1	-0.650815	-4.48606	0.00168835	0.0109643
69581	Rhou	ras homolog family member U	-0.840463	-4.48589	0.00168875	0.0109643
69740	Dph5	diphthamide biosynthesis 5	-0.339548	-4.48453	0.00169196	0.0109788
67803	Limd2	LIM domain containing 2	-0.240227	-4.48361	0.00169415	0.0109814
11305	Abca2	ATP-binding cassette, sub-family A (ABC1), member 2	-0.567425	-4.4835	0.00169441	0.0109814
66268	Pigyl	phosphatidylinositol glycan anchor biosynthesis, class Y-like	-0.905891	-4.47991	0.00170293	0.0110228
19044	Ppox	protoporphyrinogen oxidase	-0.613369	-4.47962	0.00170362	0.0110228
22428	Dctn6	dynactin 6	-0.369809	-4.47556	0.00171331	0.0110666
17974	Nck2	non-catalytic region of tyrosine kinase adaptor protein 2	-0.457619	-4.4743	0.00171635	0.0110771
317717	Sec22a	SEC22 homolog A, vesicle trafficking protein	-0.500854	-4.46887	0.00172943	0.0111516
12476	Cd151	CD151 antigen	-0.524533	-4.4682	0.00173106	0.0111527
100952	Emilin1	elastin microfibril interfacer 1	-0.242007	-4.46799	0.00173158	0.0111527
27103	Eif2ak4	eukaryotic translation initiation factor 2 alpha kinase 4	-0.331039	-4.46614	0.00173607	0.0111753
28028	Mrpl50	mitochondrial ribosomal protein L50	-0.638749	-4.46492	0.00173904	0.011188
66928	Dmac1	distal membrane arm assembly complex 1	-0.507574	-4.46408	0.00174107	0.0111947
14815	Nr3c1	nuclear receptor subfamily 3, group C, member 1	-0.568232	-4.46367	0.00174208	0.0111948
16998	Ltbp3	latent transforming growth factor beta binding protein 3	-0.5087	-4.46277	0.00174428	0.0111976
193736	Zbtb12	zinc finger and BTB domain containing 12	-0.377493	-4.46237	0.00174524	0.0111976
109857	Cbr3	carbonyl reductase 3	-0.687928	-4.46095	0.00174874	0.0112055
269589	Sytl1	synaptotagmin-like 1	-0.864594	-4.46056	0.00174968	0.0112055
66821	Bcs1l	BCS1-like (yeast)	-0.597546	-4.45206	0.00177066	0.011327
83704	Slc12a9	solute carrier family 12 (potassium/chloride transporters), member 9	-0.449631	-4.44632	0.00178498	0.0113913
16790	Anpep	alanyl (membrane) aminopeptidase	-0.538017	-4.44601	0.00178575	0.0113913
14854	Gss	glutathione synthetase	-0.484022	-4.44558	0.00178682	0.0113918
246703	Naxe	NAD(P)HX epimerase	-0.374353	-4.43694	0.00180863	0.0115243
22591	Xpc	xeroderma pigmentosum, complementation group C	-0.328335	-4.43174	0.00182189	0.0116022
26370	Cetn2	centrin 2	-0.607091	-4.42581	0.00183714	0.0116731
70099	Smc4	structural maintenance of chromosomes 4	-0.317046	-4.41825	0.00185679	0.0117847
18826	Lcp1	lymphocyte cytosolic protein 1	-0.620504	-4.41749	0.00185878	0.0117882
12763	Cmah	cytidine monophospho-N-acetylneuraminic acid hydroxylase	-0.0704847	-4.41271	0.00187134	0.0118438
14735	Gpc4	glypican 4	-0.699952	-4.41223	0.00187261	0.0118452
71228	Dlg5	discs large MAGUK scaffold protein 5	-0.287587	-4.40485	0.00189218	0.0119486
102566	Ano10	anoctamin 10	-0.653826	-4.40447	0.00189318	0.0119486
16795	Large1	LARGE xylosyl- and glucuronyltransferase 1	-0.29565	-4.40158	0.00190092	0.0119841
76238	Grhpr	glyoxylate reductase/hydroxypyruvate reductase	-0.953243	-4.39816	0.00191009	0.0120331
16562	Kif1c	kinesin family member 1C	-0.527808	-4.39689	0.00191351	0.0120331
319845	Bbs9	Bardet-Biedl syndrome 9 (human)	-0.34742	-4.39445	0.00192012	0.0120509
56791	Ube2l6	ubiquitin-conjugating enzyme E2L 6	-0.339332	-4.39409	0.00192111	0.0120509
234779	Plcg2	phospholipase C, gamma 2	-0.211471	-4.39336	0.00192308	0.0120566
21833	Thra	thyroid hormone receptor alpha	-0.721369	-4.3884	0.00193658	0.0121345
20392	Sgce	sarcoglycan, epsilon	-0.471377	-4.38563	0.00194419	0.0121651
233210	Prr12	proline rich 12	-0.275145	-4.38544	0.0019447	0.0121651
11785	Apbb1	amyloid beta (A4) precursor protein-binding, family B, member 1	-0.625563	-4.38226	0.00195345	0.012213
110279	Bcr	breakpoint cluster region	-0.472113	-4.38188	0.00195451	0.012213
18647	Cdk14	cyclin-dependent kinase 14	-0.273575	-4.37927	0.00196173	0.0122513
73251	Setd7	SET domain containing (lysine methyltransferase) 7	-0.475215	-4.3757	0.00197166	0.0122997
20667	Sox12	SRY (sex determining region Y)-box 12	-0.177853	-4.37169	0.00198285	0.012335
67283	Slc25a19	solute carrier family 25 (mitochondrial thiamine pyrophosphate carrier), member 19	-0.554307	-4.37133	0.00198385	0.012335
13400	Dmpk	dystrophia myotonica-protein kinase	-0.745747	-4.36655	0.00199732	0.0124119
12837	Col8a1	collagen, type VIII, alpha 1	-0.328261	-4.36503	0.00200163	0.0124251
67276	Eri1	exoribonuclease 1	-0.335257	-4.36122	0.00201245	0.0124785
77037	Mrap	melanocortin 2 receptor accessory protein	-0.632695	-4.35968	0.00201683	0.0124989
12496	Entpd2	ectonucleoside triphosphate diphosphohydrolase 2	-0.476134	-4.35799	0.00202166	0.0125219
74187	Katnb1	katanin p80 (WD40-containing) subunit B 1	-0.570398	-4.35636	0.00202635	0.0125416
13685	Eif4ebp1	eukaryotic translation initiation factor 4E binding protein 1	-0.545504	-4.35573	0.00202816	0.0125416
12015	Bad	BCL2-associated agonist of cell death	-0.495319	-4.35454	0.00203158	0.0125558
117109	Pop5	processing of precursor 5, ribonuclease P/MRP family (S. cerevisiae)	-0.568474	-4.35238	0.00203779	0.0125809
80861	Dhx58	DEXH (Asp-Glu-X-His) box polypeptide 58	-0.56844	-4.35236	0.00203786	0.0125809
15258	Hipk2	homeodomain interacting protein kinase 2	-0.538652	-4.34882	0.00204811	0.012631
26875	Pclo	piccolo (presynaptic cytomatrix protein)	-0.295471	-4.34861	0.00204872	0.012631
338523	Kdm7a	lysine (K)-specific demethylase 7A	-0.293701	-4.3484	0.00204933	0.012631
103468	Nup107	nucleoporin 107	-0.369686	-4.3441	0.00206185	0.0127013
16911	Lmo4	LIM domain only 4	-0.496299	-4.34205	0.00206788	0.0127311
229699	Slc16a4	solute carrier family 16 (monocarboxylic acid transporters), member 4	-0.450078	-4.34169	0.00206894	0.0127311
14261	Fmo1	flavin containing monooxygenase 1	-0.56199	-4.34054	0.00207232	0.0127449
52626	Cdkn2aipnl	CDKN2A interacting protein N-terminal like	-0.542109	-4.33785	0.00208023	0.0127693
53945	Slc40a1	solute carrier family 40 (iron-regulated transporter), member 1	-0.82954	-4.33688	0.00208309	0.0127764
140795	P2ry14	purinergic receptor P2Y, G-protein coupled, 14	-0.643756	-4.33605	0.00208553	0.0127845
26450	Rbbp9	retinoblastoma binding protein 9, serine hydrolase	-0.634622	-4.33563	0.00208678	0.0127852
12615	Cenpa	centromere protein A	-0.543848	-4.33146	0.00209917	0.0128472
114142	Foxp2	forkhead box P2	-0.173921	-4.32993	0.00210375	0.0128682
74528	Mgme1	mitochondrial genome maintenance exonuclease 1	-0.502826	-4.32947	0.00210511	0.0128696
75625	Mageh1	melanoma antigen, family H, 1	-0.644329	-4.32487	0.00211893	0.0129401
108911	Rcc2	regulator of chromosome condensation 2	-0.478527	-4.32363	0.00212267	0.012956
18205	Ntf3	neurotrophin 3	-0.362145	-4.32098	0.00213067	0.0129928
54153	Rasa4	RAS p21 protein activator 4	-0.320184	-4.32087	0.002131	0.0129928
74763	Naa60	N(alpha)-acetyltransferase 60, NatF catalytic subunit	-0.474938	-4.31953	0.00213506	0.01301
17342	Mitf	melanogenesis associated transcription factor	-0.320743	-4.31781	0.00214031	0.0130285
76779	Cluap1	clusterin associated protein 1	-0.310713	-4.3144	0.00215069	0.0130776
70314	Rabep2	rabaptin, RAB GTPase binding effector protein 2	-0.334417	-4.31234	0.00215702	0.013109
67775	Rtp4	receptor transporter protein 4	-0.826253	-4.30957	0.00216553	0.0131535
17000	Ltbr	lymphotoxin B receptor	-0.605363	-4.30309	0.00218561	0.0132535
17936	Nab1	Ngfi-A binding protein 1	-0.444783	-4.30215	0.00218852	0.0132577
20969	Sdc1	syndecan 1	-0.208551	-4.29858	0.0021997	0.0133112
66431	Oxld1	oxidoreductase like domain containing 1	-0.949286	-4.29725	0.00220387	0.0133293
23790	Coro1c	coronin, actin binding protein 1C	-0.276356	-4.29509	0.00221064	0.0133631
54721	Tyk2	tyrosine kinase 2	-0.606761	-4.29451	0.00221249	0.0133672
269713	Clip2	CAP-GLY domain containing linker protein 2	-0.597675	-4.28912	0.00222956	0.0134559
56615	Mgst1	microsomal glutathione S-transferase 1	-0.535063	-4.2881	0.00223279	0.0134682
24061	Smc1a	structural maintenance of chromosomes 1A	-0.29484	-4.28424	0.00224514	0.0135283
79554	Cptp	ceramide-1-phosphate transfer protein	-0.325173	-4.28107	0.0022553	0.013575
19206	Ptch1	patched 1	-0.442581	-4.28068	0.00225658	0.0135755
208715	Hmgcs1	3-hydroxy-3-methylglutaryl-Coenzyme A synthase 1	-0.78559	-4.27997	0.00225886	0.013582
11722	Amy1	amylase 1, salivary	-0.545993	-4.27585	0.00227217	0.0136475
76900	Ssbp4	single stranded DNA binding protein 4	-0.805511	-4.27369	0.00227922	0.0136753
19376	Rab34	RAB34, member RAS oncogene family	-0.581654	-4.27232	0.00228367	0.0136809
76467	Msrb2	methionine sulfoxide reductase B2	-0.511159	-4.27229	0.00228377	0.0136809
68024	Hist1h2bc	histone cluster 1, H2bc	-0.688824	-4.27068	0.00228902	0.0136933
71609	Tradd	TNFRSF1A-associated via death domain	-0.45366	-4.27054	0.00228948	0.0136933
16818	Lck	lymphocyte protein tyrosine kinase	-0.139008	-4.269	0.00229453	0.0137162
76282	Gpt	glutamic pyruvic transaminase, soluble	-0.524948	-4.26748	0.00229951	0.0137326
212974	Pgghg	protein glucosylgalactosylhydroxylysine glucosidase	-0.370459	-4.26446	0.00230948	0.0137755
54604	Pcnx	pecanex homolog	-0.364252	-4.26414	0.00231053	0.0137755
12323	Camk2b	calcium/calmodulin-dependent protein kinase II, beta	-0.283498	-4.26128	0.00231998	0.0138245
20846	Stat1	signal transducer and activator of transcription 1	-0.748699	-4.25983	0.00232481	0.013846
74498	Gorasp1	golgi reassembly stacking protein 1	-0.413371	-4.2581	0.00233058	0.0138731
66948	Acad8	acyl-Coenzyme A dehydrogenase family, member 8	-0.606791	-4.2544	0.00234295	0.0139321
77862	Thyn1	thymocyte nuclear protein 1	-0.754601	-4.2503	0.00235673	0.0139992
21770	Ppp2r5d	protein phosphatase 2, regulatory subunit B', delta	-0.61329	-4.24806	0.00236432	0.0140169
14339	Aktip	thymoma viral proto-oncogene 1 interacting protein	-0.336174	-4.24796	0.00236466	0.0140169
67881	Mdp1	magnesium-dependent phosphatase 1	-0.798956	-4.24725	0.00236705	0.0140237
18582	Pde6d	phosphodiesterase 6D, cGMP-specific, rod, delta	-0.398557	-4.24183	0.00238552	0.0141122
230590	Zyg11a	zyg-11 family member A, cell cycle regulator	-0.5287	-4.24177	0.00238572	0.0141122
12793	Cnih1	cornichon family AMPA receptor auxiliary protein 1	-0.532062	-4.24094	0.00238854	0.0141215
70028	Dop1b	DOP1 leucine zipper like protein B	-0.297028	-4.23734	0.00240091	0.0141872
213573	Cracr2b	calcium release activated channel regulator 2B	-0.272128	-4.23641	0.00240409	0.0141986
56531	Ylpm1	YLP motif containing 1	-0.278755	-4.23591	0.00240582	0.0142014
113868	Acaa1a	acetyl-Coenzyme A acyltransferase 1A	-0.644201	-4.23022	0.00242554	0.0142656
27405	Abcg3	ATP binding cassette subfamily G member 3	-0.345546	-4.2282	0.00243259	0.0142923
269224	Pask	PAS domain containing serine/threonine kinase	-0.153553	-4.22006	0.00246117	0.0144452
70361	Lman1	lectin, mannose-binding, 1	-0.464023	-4.21934	0.00246373	0.0144527
67389	C1qtnf12	C1q and tumor necrosis factor related 12	-0.718558	-4.21851	0.00246668	0.0144598
54160	Copg2	coatomer protein complex, subunit gamma 2	-0.698661	-4.216	0.00247557	0.0144996
19691	Recql	RecQ protein-like	-0.289923	-4.21171	0.00249089	0.0145818
22770	Zhx1	zinc fingers and homeoboxes 1	-0.41723	-4.20863	0.00250194	0.0146237
21975	Top3a	topoisomerase (DNA) III alpha	-0.261105	-4.20788	0.00250465	0.0146244
19719	Rfng	RFNG O-fucosylpeptide 3-beta-N-acetylglucosaminyltransferase	-0.386664	-4.20704	0.00250768	0.0146346
57314	Nelfcd	negative elongation factor complex member C/D, Th1l	-0.402665	-4.20612	0.002511	0.0146464
71718	Telo2	telomere maintenance 2	-0.349909	-4.20249	0.00252412	0.0147153
56150	Mad2l1	MAD2 mitotic arrest deficient-like 1	-0.215206	-4.2013	0.00252845	0.0147254
103534	Mgat4b	mannoside acetylglucosaminyltransferase 4, isoenzyme B	-0.853665	-4.19745	0.00254252	0.0147845
12934	Dpysl2	dihydropyrimidinase-like 2	-0.549406	-4.19467	0.00255272	0.0148362
102632	Acad11	acyl-Coenzyme A dehydrogenase family, member 11	-0.563786	-4.19146	0.00256452	0.0148895
68721	1110032A03Rik	RIKEN cDNA 1110032A03 gene	-0.358166	-4.1908	0.00256699	0.0148962
56248	Ak3	adenylate kinase 3	-0.568236	-4.18966	0.00257121	0.014913
223722	Mcat	malonyl CoA:ACP acyltransferase (mitochondrial)	-0.909796	-4.18277	0.00259685	0.0150309
432572	Specc1	sperm antigen with calponin homology and coiled-coil domains 1	-0.0622273	-4.18117	0.00260286	0.0150513
18004	Nek1	NIMA (never in mitosis gene a)-related expressed kinase 1	-0.319888	-4.18112	0.00260303	0.0150513
71989	Rpusd4	RNA pseudouridylate synthase domain containing 4	-0.408206	-4.17942	0.00260941	0.0150672
67473	Slc47a1	solute carrier family 47, member 1	-0.230913	-4.17932	0.00260979	0.0150672
23992	Prkra	protein kinase, interferon inducible double stranded RNA dependent activator	-0.652219	-4.17708	0.00261824	0.0151006
20751	Spr	sepiapterin reductase	-0.670089	-4.17649	0.00262047	0.0151058
223649	Nrbp2	nuclear receptor binding protein 2	-0.581723	-4.17434	0.00262863	0.0151374
171180	Syt12	synaptotagmin XII	-0.61446	-4.17295	0.00263389	0.01516
30840	Fbxl6	F-box and leucine-rich repeat protein 6	-0.57496	-4.17116	0.00264072	0.0151915
235044	Plppr2	phospholipid phosphatase related 2	-0.252817	-4.1704	0.00264361	0.0152004
15926	Idh1	isocitrate dehydrogenase 1 (NADP+), soluble	-0.797777	-4.16521	0.00266346	0.0152758
68520	Zfyve21	zinc finger, FYVE domain containing 21	-0.843757	-4.16445	0.00266639	0.0152848
76074	Gbp8	guanylate-binding protein 8	-0.316724	-4.16169	0.00267706	0.0153304
12566	Cdk2	cyclin-dependent kinase 2	-0.607075	-4.1577	0.00269254	0.0154044
78372	Snrnp25	small nuclear ribonucleoprotein 25 (U11/U12)	-0.590316	-4.15766	0.00269271	0.0154044
319899	Dock6	dedicator of cytokinesis 6	-0.527287	-4.15538	0.00270158	0.0154474
69940	Exoc1	exocyst complex component 1	-0.280471	-4.15171	0.00271595	0.0155042
14675	Gna14	guanine nucleotide binding protein, alpha 14	-0.112327	-4.14835	0.00272917	0.0155579
16572	Kif5a	kinesin family member 5A	-0.127896	-4.14778	0.00273142	0.0155629
209011	Sirt7	sirtuin 7	-0.396047	-4.14635	0.00273708	0.0155795
20649	Sntb1	syntrophin, basic 1	-1.63231	-4.14547	0.0027406	0.0155872
72612	Hpf1	histone PARylation factor 1	-0.3801	-4.14531	0.0027412	0.0155872
15107	Hadh	hydroxyacyl-Coenzyme A dehydrogenase	-0.490921	-4.14352	0.00274834	0.0156097
12418	Cbx4	chromobox 4	-0.661304	-4.14055	0.00276015	0.0156556
52552	Parp8	poly (ADP-ribose) polymerase family, member 8	-0.234779	-4.13582	0.00277912	0.015749
18643	Pfn1	profilin 1	-0.39589	-4.13576	0.00277939	0.015749
66892	Eif4e3	eukaryotic translation initiation factor 4E member 3	-0.66791	-4.13467	0.00278375	0.0157658
435684	Shf	Src homology 2 domain containing F	-0.41559	-4.13082	0.00279932	0.0158302
73723	Sh3bgrl3	SH3 domain binding glutamic acid-rich protein-like 3	-0.449697	-4.12736	0.00281342	0.0159019
66398	Commd5	COMM domain containing 5	-0.59904	-4.12526	0.00282197	0.0159423
17961	Nat2	N-acetyltransferase 2 (arylamine N-acetyltransferase)	-0.715681	-4.12348	0.00282929	0.0159757
67727	Stx17	syntaxin 17	-0.462255	-4.12268	0.00283256	0.0159854
217666	L2hgdh	L-2-hydroxyglutarate dehydrogenase	-0.518468	-4.12237	0.00283385	0.0159854
230514	Leprot	leptin receptor overlapping transcript	-0.565263	-4.12152	0.00283732	0.0159936
13713	Elk3	ELK3, member of ETS oncogene family	-0.437406	-4.1177	0.00285311	0.0160541
228026	Pdk1	pyruvate dehydrogenase kinase, isoenzyme 1	-0.731236	-4.1145	0.00286638	0.0161207
71735	Lrwd1	leucine-rich repeats and WD repeat domain containing 1	-0.184995	-4.11413	0.00286793	0.0161214
57915	Tbc1d1	TBC1 domain family, member 1	-0.254141	-4.11008	0.00288485	0.0161946
69379	C8g	complement component 8, gamma polypeptide	-0.714542	-4.10998	0.00288524	0.0161946
233328	Lrrk1	leucine-rich repeat kinase 1	-0.243986	-4.10691	0.00289814	0.0162428
17855	Mvk	mevalonate kinase	-0.845518	-4.10609	0.00290158	0.016254
231051	Kmt2c	lysine (K)-specific methyltransferase 2C	-0.491653	-4.10376	0.00291145	0.0163013
20250	Scd2	stearoyl-Coenzyme A desaturase 2	-0.718905	-4.10234	0.00291744	0.0163186
20203	S100b	S100 protein, beta polypeptide, neural	-0.743868	-4.09971	0.00292861	0.016373
12336	Capns1	calpain, small subunit 1	-0.384579	-4.09821	0.00293499	0.0164006
233863	Gtf3c1	general transcription factor III C 1	-0.384278	-4.0962	0.0029436	0.0164405
216795	Wnt9a	wingless-type MMTV integration site family, member 9A	-0.124015	-4.09316	0.00295665	0.0165053
14102	Fas	Fas (TNF receptor superfamily member 6)	-0.559902	-4.09235	0.00296015	0.0165167
72792	2810459M11Rik	RIKEN cDNA 2810459M11 gene	-0.275811	-4.09198	0.00296171	0.0165173
69020	Zfp707	zinc finger protein 707	-0.289069	-4.09093	0.00296627	0.0165345
20615	Snapin	SNAP-associated protein	-0.484779	-4.08838	0.00297726	0.0165876
234865	Nup133	nucleoporin 133	-0.368435	-4.08792	0.00297926	0.0165906
241066	Carf	calcium response factor	-0.406681	-4.08675	0.00298436	0.0166108
12819	Col15a1	collagen, type XV, alpha 1	-1.00178	-4.08601	0.00298756	0.0166204
27393	Mrpl39	mitochondrial ribosomal protein L39	-0.304468	-4.08519	0.00299113	0.0166321
11671	Aldh3a2	aldehyde dehydrogenase family 3, subfamily A2	-0.549489	-4.08138	0.00300777	0.0167164
21343	Taf6	TATA-box binding protein associated factor 6	-0.412067	-4.07906	0.00301794	0.0167647
56358	Copz2	coatomer protein complex, subunit zeta 2	-0.675453	-4.07287	0.00304529	0.0168938
81500	Sil1	endoplasmic reticulum chaperone SIL1 homolog (S. cerevisiae)	-0.490914	-4.07279	0.00304566	0.0168938
51789	Tnk2	tyrosine kinase, non-receptor, 2	-0.475337	-4.07245	0.00304717	0.0168939
69917	Nabp2	nucleic acid binding protein 2	-0.612593	-4.06791	0.00306739	0.0169865
76025	Cant1	calcium activated nucleotidase 1	-0.431082	-4.06643	0.00307402	0.0170043
56066	Cxcl11	chemokine (C-X-C motif) ligand 11	-0.220744	-4.0663	0.00307461	0.0170043
23872	Ets2	E26 avian leukemia oncogene 2, 3' domain	-0.587599	-4.06516	0.0030797	0.0170241
15399	Hoxa2	homeobox A2	-0.340785	-4.06177	0.003095	0.0171004
83379	Klb	klotho beta	-0.618123	-4.05906	0.00310723	0.0171512
68099	Fam92a	family with sequence similarity 92, member A	-0.355518	-4.05731	0.00311521	0.0171785
12305	Ddr1	discoidin domain receptor family, member 1	-0.488514	-4.05731	0.00311521	0.0171785
18753	Prkcd	protein kinase C, delta	-0.338976	-4.05588	0.00312169	0.0172058
27398	Mrpl2	mitochondrial ribosomal protein L2	-0.5203	-4.05549	0.00312348	0.0172073
13864	Nr2f6	nuclear receptor subfamily 2, group F, member 6	-0.564843	-4.05195	0.00313967	0.017288
109754	Cyb5r3	cytochrome b5 reductase 3	-0.417123	-4.05096	0.00314421	0.0173046
217664	Mgat2	mannoside acetylglucosaminyltransferase 2	-0.476155	-4.04907	0.00315292	0.0173356
225913	Tkfc	triokinase, FMN cyclase	-0.556157	-4.04874	0.00315443	0.0173356
76893	Cers2	ceramide synthase 2	-0.478388	-4.04797	0.00315794	0.0173356
233046	Rasgrp4	RAS guanyl releasing protein 4	-0.104851	-4.04774	0.00315903	0.0173356
19387	Rangap1	RAN GTPase activating protein 1	-0.530726	-4.04707	0.00316213	0.0173442
97998	Deptor	DEP domain containing MTOR-interacting protein	-0.704603	-4.04481	0.00317259	0.0173847
13476	Reep5	receptor accessory protein 5	-0.760971	-4.04338	0.00317923	0.0174127
232906	Arhgap35	Rho GTPase activating protein 35	-0.54726	-4.04099	0.00319036	0.0174565
110095	Pygl	liver glycogen phosphorylase	-0.724707	-4.04041	0.00319306	0.0174565
13602	Sparcl1	SPARC-like 1	-0.470515	-4.03893	0.00319999	0.0174824
22411	Wnt11	wingless-type MMTV integration site family, member 11	-0.269485	-4.03865	0.00320125	0.0174824
67028	2610002M06Rik	RIKEN cDNA 2610002M06 gene	-0.248411	-4.03566	0.0032153	0.0175422
259302	Srgap3	SLIT-ROBO Rho GTPase activating protein 3	-0.144162	-4.034	0.0032231	0.0175763
218734	3830406C13Rik	RIKEN cDNA 3830406C13 gene	-0.524131	-4.03261	0.00322967	0.0176036
12402	Cbl	Casitas B-lineage lymphoma	-0.391678	-4.03097	0.00323745	0.0176291
26611	Rcn2	reticulocalbin 2	-0.537558	-4.02379	0.00327163	0.0177895
17535	Mre11a	MRE11A homolog A, double strand break repair nuclease	-0.442455	-4.02266	0.00327708	0.0178021
21416	Tcf7l2	transcription factor 7 like 2, T cell specific, HMG box	-0.281942	-4.02265	0.0032771	0.0178021
103213	Traf3ip2	TRAF3 interacting protein 2	-0.303464	-4.02181	0.00328112	0.0178154
68379	Ciz1	CDKN1A interacting zinc finger protein 1	-0.296717	-4.02061	0.0032869	0.0178318
67448	Plxdc2	plexin domain containing 2	-0.511625	-4.02053	0.0032873	0.0178318
55980	Impa1	inositol (myo)-1(or 4)-monophosphatase 1	-0.336323	-4.01437	0.00331712	0.0179763
140742	Sesn1	sestrin 1	-0.503143	-4.01318	0.0033229	0.0179991
11622	Ahr	aryl-hydrocarbon receptor	-0.37081	-4.01244	0.00332652	0.0180101
94218	Cnnm3	cyclin M3	-0.270607	-4.01107	0.00333317	0.0180374
19267	Ptpre	protein tyrosine phosphatase, receptor type, E	-0.207549	-4.0095	0.00334087	0.0180636
19889	Rp2	retinitis pigmentosa 2 homolog	-0.293587	-4.00794	0.00334852	0.0180945
16582	Kifc3	kinesin family member C3	-0.615609	-4.00685	0.00335388	0.0181148
232078	Thnsl2	threonine synthase-like 2 (bacterial)	-0.644679	-4.00542	0.00336091	0.0181441
73225	Fam118a	family with sequence similarity 118, member A	-0.322642	-4.00319	0.00337194	0.0181882
67249	Tbc1d19	TBC1 domain family, member 19	-0.343615	-4.00312	0.00337229	0.0181882
67042	Ift27	intraflagellar transport 27	-0.601036	-4.00259	0.00337492	0.0181937
68044	Chac2	ChaC, cation transport regulator 2	-0.554456	-4.001	0.00338281	0.0182189
16859	Lgals9	lectin, galactose binding, soluble 9	-0.665415	-3.99925	0.00339147	0.0182568
14056	Ezh2	enhancer of zeste 2 polycomb repressive complex 2 subunit	-0.207259	-3.99513	0.00341204	0.0183414
71586	Ifih1	interferon induced with helicase C domain 1	-0.544477	-3.99409	0.0034173	0.0183609
78670	Plekhj1	pleckstrin homology domain containing, family J member 1	-0.372434	-3.99232	0.00342616	0.018391
234371	Tmem161a	transmembrane protein 161A	-0.446682	-3.99072	0.00343425	0.0184169
57441	Gmnn	geminin	-0.358667	-3.98805	0.00344774	0.0184718
109594	Lmo1	LIM domain only 1	-0.846032	-3.98334	0.00347166	0.0185762
13844	Ephb2	Eph receptor B2	-0.188562	-3.98199	0.0034786	0.0186019
76681	Trim12a	tripartite motif-containing 12A	-0.357402	-3.98139	0.00348167	0.0186095
56427	Tubd1	tubulin, delta 1	-0.501699	-3.9805	0.00348622	0.0186162
57312	Mrps31	mitochondrial ribosomal protein S31	-0.384569	-3.98014	0.00348805	0.0186172
16801	Arhgef1	Rho guanine nucleotide exchange factor (GEF) 1	-0.330365	-3.97903	0.00349374	0.0186388
20293	Ccl12	chemokine (C-C motif) ligand 12	-0.504138	-3.97859	0.00349603	0.0186422
76784	Mtif2	mitochondrial translational initiation factor 2	-0.53298	-3.97636	0.0035075	0.0186857
213988	Tnrc6b	trinucleotide repeat containing 6b	-0.442551	-3.97507	0.00351417	0.0187125
74748	Slamf8	SLAM family member 8	-0.238189	-3.97119	0.00353426	0.0188017
54369	Nme6	NME/NM23 nucleoside diphosphate kinase 6	-0.405004	-3.97034	0.00353872	0.0188166
100683	Trrap	transformation/transcription domain-associated protein	-0.290651	-3.96946	0.00354327	0.018832
12483	Cd22	CD22 antigen	-0.102194	-3.96686	0.00355687	0.0188864
68775	Atp6v1c2	ATPase, H+ transporting, lysosomal V1 subunit C2	-0.176112	-3.96637	0.00355944	0.0188864
72656	Ints8	integrator complex subunit 8	-0.255424	-3.96323	0.00357596	0.0189611
209586	Nudcd3	NudC domain containing 3	-0.350238	-3.95861	0.00360039	0.0190728
64436	Inpp5e	inositol polyphosphate-5-phosphatase E	-0.310117	-3.95331	0.00362862	0.0192134
52633	Nit2	nitrilase family, member 2	-0.689063	-3.9506	0.00364311	0.019281
71602	Myo1e	myosin IE	-0.20149	-3.95003	0.00364617	0.0192882
170719	Oxr1	oxidation resistance 1	-0.517159	-3.94754	0.00365958	0.0193286
79464	Lias	lipoic acid synthetase	-0.442318	-3.94735	0.00366064	0.0193286
18799	Plcd1	phospholipase C, delta 1	-0.652415	-3.94677	0.00366378	0.0193306
227624	Rabl6	RAB, member RAS oncogene family-like 6	-0.371938	-3.94665	0.00366443	0.0193306
68742	Tmem219	transmembrane protein 219	-0.431359	-3.94375	0.0036801	0.0194031
23961	Oas1b	2'-5' oligoadenylate synthetase 1B	-0.270985	-3.94348	0.00368162	0.0194031
26874	Abcd2	ATP-binding cassette, sub-family D (ALD), member 2	-1.44251	-3.94207	0.00368929	0.0194345
107528	Magee1	melanoma antigen, family E, 1	-0.335047	-3.93855	0.00370846	0.0195173
53310	Dlg3	discs large MAGUK scaffold protein 3	-0.340203	-3.93805	0.00371119	0.0195226
276846	Pigs	phosphatidylinositol glycan anchor biosynthesis, class S	-0.614613	-3.93665	0.00371891	0.019545
19171	Psmb10	proteasome (prosome, macropain) subunit, beta type 10	-0.741829	-3.93517	0.00372706	0.0195716
217430	Pqlc3	PQ loop repeat containing	-0.576061	-3.93492	0.00372839	0.0195716
15451	Hpn	hepsin	-0.252922	-3.93374	0.00373491	0.0195836
78309	Cul9	cullin 9	-0.305564	-3.93238	0.00374243	0.0196139
16988	Lst1	leukocyte specific transcript 1	-1.00492	-3.93205	0.00374426	0.0196144
235587	Parp3	poly (ADP-ribose) polymerase family, member 3	-0.770879	-3.93078	0.00375126	0.0196329
68201	Ccdc34	coiled-coil domain containing 34	-0.101418	-3.92961	0.00375777	0.0196481
68925	Rpap1	RNA polymerase II associated protein 1	-0.291786	-3.92932	0.00375936	0.0196481
74340	Ahcyl2	S-adenosylhomocysteine hydrolase-like 2	-0.534474	-3.92789	0.00376731	0.0196805
17313	Mgp	matrix Gla protein	-0.665551	-3.92173	0.00380178	0.0197966
26424	Nr5a2	nuclear receptor subfamily 5, group A, member 2	-0.133858	-3.91874	0.00381865	0.0198753
77090	Ocel1	occludin/ELL domain containing 1	-0.277435	-3.91721	0.00382728	0.019911
13830	Stom	stomatin	-0.558003	-3.91682	0.00382951	0.0199135
67432	Hoga1	4-hydroxy-2-oxoglutarate aldolase 1	-0.369869	-3.91284	0.00385211	0.0199942
18971	Pold1	polymerase (DNA directed), delta 1, catalytic subunit	-0.28924	-3.91161	0.00385915	0.0200216
68267	Slc25a22	solute carrier family 25 (mitochondrial carrier, glutamate), member 22	-0.622667	-3.91029	0.0038667	0.0200227
212647	Aldh4a1	aldehyde dehydrogenase 4 family, member A1	-0.499837	-3.91022	0.00386708	0.0200227
70026	Tspo2	translocator protein 2	-0.0605205	-3.91013	0.00386758	0.0200227
54601	Foxo4	forkhead box O4	-0.329601	-3.91002	0.00386822	0.0200227
14645	Glul	glutamate-ammonia ligase (glutamine synthetase)	-0.544093	-3.90941	0.00387172	0.0200316
76954	St5	suppression of tumorigenicity 5	-0.459274	-3.90879	0.00387527	0.0200346
71785	Pdgfd	platelet-derived growth factor, D polypeptide	-0.392425	-3.9084	0.00387753	0.0200346
67725	Nudt13	nudix (nucleoside diphosphate linked moiety X)-type motif 13	-0.713379	-3.9024	0.00391212	0.0202037
106766	Stap2	signal transducing adaptor family member 2	-0.405223	-3.89616	0.00394847	0.0203712
74136	Sec14l1	SEC14-like lipid binding 1	-0.529928	-3.89505	0.00395499	0.0203786
75430	Anapc15	anaphase prompoting complex C subunit 15	-0.199438	-3.89434	0.00395915	0.0203859
98396	Slc41a1	solute carrier family 41, member 1	-0.630462	-3.89394	0.00396148	0.0203859
140484	Pofut1	protein O-fucosyltransferase 1	-0.399005	-3.89388	0.00396183	0.0203859
12774	Ccr5	chemokine (C-C motif) receptor 5	-0.430842	-3.89163	0.00397505	0.0204354
67784	Plxnd1	plexin D1	-0.567175	-3.88987	0.00398546	0.0204765
257633	Acsf3	acyl-CoA synthetase family member 3	-0.574288	-3.88394	0.00402065	0.0206323
94094	Trim34a	tripartite motif-containing 34A	-0.293204	-3.88363	0.00402255	0.0206324
224697	Adamts10	a disintegrin-like and metallopeptidase (reprolysin type) with thrombospondin type 1 motif, 10	-0.438274	-3.88177	0.00403363	0.0206642
18760	Prkd1	protein kinase D1	-0.455978	-3.88168	0.00403417	0.0206642
14456	Gas6	growth arrest specific 6	-0.788053	-3.87981	0.00404542	0.0207115
67384	Bag4	BCL2-associated athanogene 4	-0.402284	-3.87953	0.00404707	0.0207115
12822	Col18a1	collagen, type XVIII, alpha 1	-0.371439	-3.87469	0.00407623	0.0208513
26383	Fto	fat mass and obesity associated	-0.345945	-3.87162	0.00409491	0.02092
106014	Tafa5	TAFA chemokine like family member 5	-0.335425	-3.87038	0.00410246	0.0209381
229285	Spg20	spastic paraplegia 20, spartin (Troyer syndrome) homolog (human)	-0.358603	-3.86979	0.00410607	0.020947
13019	Ctf1	cardiotrophin 1	-0.69371	-3.8671	0.0041225	0.0210214
106947	Slc39a3	solute carrier family 39 (zinc transporter), member 3	-0.409852	-3.86544	0.00413269	0.0210544
22589	Atrx	ATRX, chromatin remodeler	-0.254095	-3.86311	0.00414702	0.0211179
18053	Ngfr	nerve growth factor receptor (TNFR superfamily, member 16)	-0.0992279	-3.85972	0.00416798	0.021215
66375	Dhrs7	dehydrogenase/reductase (SDR family) member 7	-0.724738	-3.85791	0.00417918	0.0212625
80752	Fam20c	family with sequence similarity 20, member C	-0.634875	-3.85526	0.00419571	0.0213303
72461	Prcp	prolylcarboxypeptidase (angiotensinase C)	-0.420233	-3.85517	0.00419628	0.0213303
17079	Cd180	CD180 antigen	-0.233148	-3.84807	0.00424086	0.0215472
107723	Slc12a6	solute carrier family 12, member 6	-0.279316	-3.84656	0.00425039	0.0215859
16452	Jak2	Janus kinase 2	-0.477364	-3.84617	0.00425289	0.021589
225845	Plaat3	phospholipase A and acyltransferase 3	-0.709985	-3.84569	0.0042559	0.0215946
72043	Sulf2	sulfatase 2	-0.710162	-3.84532	0.00425828	0.0215969
225791	Zadh2	zinc binding alcohol dehydrogenase, domain containing 2	-0.576001	-3.84484	0.00426128	0.0216025
24105	Rbck1	RanBP-type and C3HC4-type zinc finger containing 1	-0.568845	-3.8441	0.00426603	0.0216071
22169	Cmpk2	cytidine monophosphate (UMP-CMP) kinase 2, mitochondrial	-0.674565	-3.84337	0.00427065	0.0216209
13197	Gadd45a	growth arrest and DNA-damage-inducible 45 alpha	-0.335698	-3.84007	0.00429166	0.0217175
11844	Arf5	ADP-ribosylation factor 5	-0.388919	-3.8378	0.00430621	0.0217814
69155	1810030O07Rik	RIKEN cDNA 1810030O07 gene	-0.451294	-3.83292	0.00433765	0.0218817
17524	Mpp1	membrane protein, palmitoylated	-0.541649	-3.83225	0.004342	0.0218939
77975	Tmem50b	transmembrane protein 50B	-0.459193	-3.83182	0.00434477	0.0218944
100986	Akap9	A kinase (PRKA) anchor protein (yotiao) 9	-0.360389	-3.83105	0.00434976	0.0219038
69894	Fam241b	family with sequence similarity 241, member B	-0.23907	-3.82898	0.00436325	0.0219439
53611	Vti1a	vesicle transport through interaction with t-SNAREs 1A	-0.480745	-3.82863	0.0043655	0.0219439
109901	Cela1	chymotrypsin-like elastase family, member 1	-0.714986	-3.82597	0.00438288	0.0220117
74238	Mterf2	mitochondrial transcription termination factor 2	-0.642558	-3.8237	0.00439771	0.0220612
21872	Tjp1	tight junction protein 1	-0.543311	-3.82239	0.0044063	0.0220901
12830	Col4a5	collagen, type IV, alpha 5	-0.239803	-3.81967	0.00442424	0.0221604
109154	Mlec	malectin	-0.520198	-3.81425	0.00446023	0.0223302
74012	Rap2b	RAP2B, member of RAS oncogene family	-0.308064	-3.80925	0.00449362	0.0224681
24004	Rai2	retinoic acid induced 2	-0.441353	-3.80291	0.00453643	0.0226621
102580	Alg9	asparagine-linked glycosylation 9 (alpha 1,2 mannosyltransferase)	-0.296632	-3.8025	0.00453922	0.022666
50767	Pnpla6	patatin-like phospholipase domain containing 6	-0.529105	-3.8003	0.00455418	0.0227307
13481	Dpm2	dolichol-phosphate (beta-D) mannosyltransferase 2	-0.373538	-3.79916	0.00456192	0.0227493
23928	Lamc3	laminin gamma 3	-0.529903	-3.79677	0.00457826	0.0228207
20194	S100a10	S100 calcium binding protein A10 (calpactin)	-0.730799	-3.78676	0.00464737	0.0231041
13823	Epb41l3	erythrocyte membrane protein band 4.1 like 3	-0.156008	-3.78498	0.00465974	0.0231452
76560	Prss8	protease, serine 8 (prostasin)	-0.258431	-3.77941	0.00469877	0.0233186
26364	Adgre5	adhesion G protein-coupled receptor E5	-0.541116	-3.77881	0.00470305	0.0233296
11857	Arhgdib	Rho, GDP dissociation inhibitor (GDI) beta	-0.332612	-3.77547	0.00472662	0.0234157
70310	Plscr3	phospholipid scramblase 3	-0.358623	-3.77492	0.00473053	0.0234248
22612	Yes1	YES proto-oncogene 1, Src family tyrosine kinase	-0.259568	-3.77222	0.0047497	0.0234889
72119	Tpx2	TPX2, microtubule-associated	-0.107482	-3.76919	0.0047713	0.0235751
497652	Acd	adrenocortical dysplasia	-0.280234	-3.7683	0.0047777	0.0235861
50791	Magi2	membrane associated guanylate kinase, WW and PDZ domain containing 2	-0.141479	-3.76728	0.00478499	0.0236118
29871	Scmh1	sex comb on midleg homolog 1	-0.231443	-3.76505	0.00480106	0.0236705
19035	Ppib	peptidylprolyl isomerase B	-0.59225	-3.76267	0.00481822	0.0237447
14151	Fech	ferrochelatase	-0.461865	-3.76132	0.00482797	0.0237824
109652	Acy1	aminoacylase 1	-0.526768	-3.76008	0.00483698	0.0238043
19354	Rac2	Rac family small GTPase 2	-0.300273	-3.75562	0.00486945	0.023945
22365	Vps45	vacuolar protein sorting 45	-0.290497	-3.75483	0.00487528	0.0239632
76568	Ift46	intraflagellar transport 46	-0.341931	-3.75402	0.0048812	0.0239715
17828	Bloc1s5	biogenesis of lysosomal organelles complex-1, subunit 5, muted	-0.666596	-3.75338	0.00488591	0.0239842
66435	Uggt2	UDP-glucose glycoprotein glucosyltransferase 2	-0.129681	-3.75259	0.00489169	0.0240022
14453	Gas2	growth arrest specific 2	-0.242955	-3.74784	0.00492673	0.0241427
75805	Nln	neurolysin (metallopeptidase M3 family)	-0.525799	-3.74316	0.00496148	0.0242709
108903	Tbcd	tubulin-specific chaperone d	-0.352417	-3.7426	0.00496563	0.0242807
231327	Ppat	phosphoribosyl pyrophosphate amidotransferase	-0.348516	-3.74153	0.00497367	0.0243095
18108	Nmt2	N-myristoyltransferase 2	-0.529379	-3.73847	0.00499659	0.024411
76905	Lrg1	leucine-rich alpha-2-glycoprotein 1	-0.911558	-3.73765	0.00500275	0.0244305
16068	Il18bp	interleukin 18 binding protein	-0.675934	-3.73679	0.00500921	0.024441
11907	Ate1	arginyltransferase 1	-0.304307	-3.73486	0.00502379	0.0245016
17314	Mgmt	O-6-methylguanine-DNA methyltransferase	-0.750406	-3.73456	0.00502608	0.0245021
68598	Dnajc8	DnaJ heat shock protein family (Hsp40) member C8	-0.421238	-3.72817	0.00507459	0.0247173
13110	Cyp2j6	cytochrome P450, family 2, subfamily j, polypeptide 6	-0.392158	-3.72553	0.00509478	0.0247868
73680	Zbtb8a	zinc finger and BTB domain containing 8a	-0.323083	-3.72462	0.00510182	0.0248072
67865	Rgs10	regulator of G-protein signalling 10	-0.43727	-3.72403	0.00510635	0.0248125
16881	Lig1	ligase I, DNA, ATP-dependent	-0.15519	-3.72261	0.00511724	0.0248395
14865	Gstm4	glutathione S-transferase, mu 4	-0.693761	-3.71852	0.00514884	0.0249714
171508	Creld1	cysteine-rich with EGF-like domains 1	-0.462158	-3.71707	0.00516015	0.0250155
12977	Csf1	colony stimulating factor 1 (macrophage)	-0.385825	-3.71632	0.00516594	0.0250329
67914	Coq9	coenzyme Q9	-0.557848	-3.71462	0.0051792	0.0250823
328977	Zfp532	zinc finger protein 532	-0.353311	-3.71397	0.00518429	0.0250896
217830	Dglucy	D-glutamate cyclase	-0.543109	-3.7104	0.00521227	0.0251819
15434	Hoxd3	homeobox D3	-0.154023	-3.70835	0.00522836	0.0252273
56043	Akr1e1	aldo-keto reductase family 1, member E1	-0.584739	-3.70736	0.00523618	0.0252466
217166	Nr1d1	nuclear receptor subfamily 1, group D, member 1	-0.803777	-3.70563	0.00524984	0.0252878
21356	Tapbp	TAP binding protein	-0.476311	-3.70453	0.00525857	0.025319
16796	Lasp1	LIM and SH3 protein 1	-0.42618	-3.70222	0.00527693	0.0253858
213760	Prepl	prolyl endopeptidase-like	-0.389301	-3.7015	0.00528271	0.025392
56542	Ick	intestinal cell kinase	-0.269479	-3.69985	0.0052958	0.0254351
68180	Hyi	hydroxypyruvate isomerase (putative)	-0.412141	-3.69981	0.00529616	0.0254351
26914	H2afy	H2A histone family, member Y	-0.390315	-3.69693	0.00531923	0.025535
80912	Pum1	pumilio RNA-binding family member 1	-0.42568	-3.6957	0.00532907	0.0255535
18606	Enpp2	ectonucleotide pyrophosphatase/phosphodiesterase 2	-0.679908	-3.69544	0.00533118	0.0255535
19039	Lgals3bp	lectin, galactoside-binding, soluble, 3 binding protein	-0.828334	-3.69533	0.00533211	0.0255535
17347	Mknk2	MAP kinase-interacting serine/threonine kinase 2	-0.659253	-3.69153	0.00536275	0.0256568
16633	Klra2	killer cell lectin-like receptor, subfamily A, member 2	-0.207011	-3.69066	0.00536983	0.0256798
50880	Scly	selenocysteine lyase	-0.334715	-3.68992	0.00537584	0.0256977
71982	Snx10	sorting nexin 10	-0.523886	-3.68922	0.00538147	0.0257138
116733	Vps4a	vacuolar protein sorting 4A	-0.280323	-3.68461	0.0054191	0.0258826
66366	Ergic3	ERGIC and golgi 3	-0.449549	-3.68305	0.00543192	0.025922
245555	Nexmif	neurite extension and migration factor	-0.0371249	-3.67837	0.00547043	0.0260947
66096	Lamtor4	late endosomal/lysosomal adaptor, MAPK and MTOR activator 4	-0.452444	-3.6771	0.00548094	0.0261269
108155	Ogt	O-linked N-acetylglucosamine (GlcNAc) transferase (UDP-N-acetylglucosamine:polypeptide-N-acetylglucosaminyl transferase)	-0.368359	-3.67546	0.00549453	0.0261655
233016	Blvrb	biliverdin reductase B (flavin reductase (NADPH))	-0.706154	-3.67383	0.00550809	0.026208
56459	Sae1	SUMO1 activating enzyme subunit 1	-0.547017	-3.67011	0.00553917	0.0263339
19165	Psen2	presenilin 2	-0.352599	-3.66829	0.00555446	0.0263954
24083	Natd1	N-acetyltransferase domain containing 1	-0.266348	-3.66623	0.00557181	0.0264556
74053	Grip1	glutamate receptor interacting protein 1	-0.209534	-3.66504	0.00558189	0.0264784
223666	Arhgap39	Rho GTPase activating protein 39	-0.293047	-3.66483	0.00558365	0.0264784
12444	Ccnd2	cyclin D2	-0.58664	-3.66455	0.00558598	0.0264784
52163	Camk1	calcium/calmodulin-dependent protein kinase I	-0.35955	-3.65673	0.00565254	0.0267692
66822	Fbxo25	F-box protein 25	-0.635296	-3.65514	0.00566615	0.0268135
53885	Nphp1	nephronophthisis 1 (juvenile) homolog (human)	-0.585308	-3.65406	0.00567541	0.026846
71998	Slc25a35	solute carrier family 25, member 35	-0.476872	-3.65325	0.00568241	0.0268679
101706	Numa1	nuclear mitotic apparatus protein 1	-0.476814	-3.65259	0.00568805	0.0268834
109168	Atl3	atlastin GTPase 3	-0.754564	-3.65099	0.00570187	0.0269374
69287	Odf3	outer dense fiber of sperm tails 3	-0.12123	-3.64951	0.00571464	0.0269865
59010	Sqor	sulfide quinone oxidoreductase	-0.527923	-3.6452	0.00575211	0.0271387
73218	Sppl2b	signal peptide peptidase like 2B	-0.48708	-3.64498	0.00575408	0.0271387
58223	Mmp19	matrix metallopeptidase 19	-0.758981	-3.64407	0.00576197	0.0271646
79202	Tnfrsf22	tumor necrosis factor receptor superfamily, member 22	-0.0855144	-3.64151	0.0057844	0.0272394
67441	Isoc2b	isochorismatase domain containing 2b	-0.669642	-3.64143	0.00578507	0.0272394
16432	Itm2b	integral membrane protein 2B	-0.477588	-3.63945	0.00580247	0.0272823
56613	Rps6ka4	ribosomal protein S6 kinase, polypeptide 4	-0.582893	-3.6393	0.00580381	0.0272823
51875	Tmem141	transmembrane protein 141	-0.609224	-3.63883	0.00580799	0.0272906
52466	Slc46a1	solute carrier family 46, member 1	-0.581165	-3.63705	0.00582365	0.0273398
14600	Ghr	growth hormone receptor	-0.753294	-3.63666	0.00582713	0.0273398
54124	Cks1b	CDC28 protein kinase 1b	-0.493383	-3.63654	0.00582815	0.0273398
19273	Ptpru	protein tyrosine phosphatase, receptor type, U	-0.274383	-3.63601	0.00583282	0.0273504
14057	Sfxn1	sideroflexin 1	-0.560996	-3.63348	0.00585527	0.0274329
93734	Mpv17l	Mpv17 transgene, kidney disease mutant-like	-0.198976	-3.63083	0.00587886	0.027532
26385	Grk6	G protein-coupled receptor kinase 6	-0.616207	-3.62546	0.00592699	0.0277116
14263	Fmo5	flavin containing monooxygenase 5	-0.356735	-3.62235	0.00595507	0.0278313
380967	Tmem106c	transmembrane protein 106C	-0.54024	-3.62185	0.00595958	0.0278409
17859	Mxi1	MAX interactor 1, dimerization protein	-0.446418	-3.62093	0.00596789	0.0278682
67733	Itgb3bp	integrin beta 3 binding protein (beta3-endonexin)	-0.1922	-3.61924	0.00598329	0.0279286
105663	Thtpa	thiamine triphosphatase	-0.467933	-3.61849	0.00599013	0.0279471
77559	Agl	amylo-1,6-glucosidase, 4-alpha-glucanotransferase	-0.47249	-3.61826	0.00599219	0.0279471
107971	Frs3	fibroblast growth factor receptor substrate 3	-0.196571	-3.61516	0.0060205	0.028056
26949	Vat1	vesicle amine transport 1	-0.438068	-3.6147	0.00602471	0.028064
13732	Emp3	epithelial membrane protein 3	-0.553902	-3.61366	0.0060342	0.0280967
56356	Gltp	glycolipid transfer protein	-0.500329	-3.61189	0.00605045	0.0281607
228880	Zmynd8	zinc finger, MYND-type containing 8	-0.198394	-3.61033	0.00606482	0.028216
22248	Unc119	unc-119 lipid binding chaperone	-0.435918	-3.60815	0.00608496	0.0282864
69179	Stimate	STIM activating enhancer	-0.510474	-3.60747	0.00609123	0.028304
14287	Fpgs	folylpolyglutamyl synthetase	-0.238686	-3.60387	0.00612473	0.0284362
106794	Dhx57	DEAH (Asp-Glu-Ala-Asp/His) box polypeptide 57	-0.308802	-3.60267	0.00613587	0.0284763
14667	Gm2a	GM2 ganglioside activator protein	-0.496114	-3.60186	0.00614348	0.0284977
16579	Kifap3	kinesin-associated protein 3	-0.428558	-3.60164	0.00614552	0.0284977
12266	C3	complement component 3	-0.566981	-3.59788	0.00618084	0.028638
215653	Rassf2	Ras association (RalGDS/AF-6) domain family member 2	-0.315703	-3.5957	0.00620133	0.0287211
11982	Atp10a	ATPase, class V, type 10A	-0.255478	-3.59536	0.00620458	0.0287245
80877	Lrba	LPS-responsive beige-like anchor	-0.383339	-3.59502	0.00620776	0.0287274
80751	Rnf34	ring finger protein 34	-0.405981	-3.59325	0.00622453	0.0287808
13132	Dab2	disabled 2, mitogen-responsive phosphoprotein	-0.393877	-3.59236	0.00623291	0.0287808
60409	Trappc4	trafficking protein particle complex 4	-0.550668	-3.59219	0.00623456	0.0287808
170728	Rtn4ip1	reticulon 4 interacting protein 1	-0.298197	-3.58997	0.00625566	0.0288664
17858	Mx2	MX dynamin-like GTPase 2	-0.258124	-3.58937	0.0062614	0.0288811
66044	Dtd1	D-tyrosyl-tRNA deacylase 1	-0.650261	-3.58909	0.00626404	0.0288815
54218	B3galt4	UDP-Gal:betaGlcNAc beta 1,3-galactosyltransferase, polypeptide 4	-0.314756	-3.58386	0.00631419	0.0290878
58200	Ppp1r1a	protein phosphatase 1, regulatory inhibitor subunit 1A	-0.717925	-3.58362	0.0063165	0.0290878
66747	4933400A11Rik	capping protein (actin filament) muscle Z-line, alpha 1 pseudogene	-0.383062	-3.58279	0.00632446	0.0291126
214952	Rhot2	ras homolog family member T2	-0.295061	-3.58215	0.00633063	0.0291155
18596	Pdgfrb	platelet derived growth factor receptor, beta polypeptide	-0.441264	-3.58211	0.006331	0.0291155
16976	Lrpap1	low density lipoprotein receptor-related protein associated protein 1	-0.325598	-3.58193	0.00633282	0.0291155
23805	Apc2	adenomatosis polyposis coli 2	-0.0926384	-3.57902	0.00636097	0.0292331
67763	Prpsap1	phosphoribosyl pyrophosphate synthetase-associated protein 1	-0.296653	-3.57519	0.00639819	0.0293803
98878	Ehd4	EH-domain containing 4	-0.321735	-3.57351	0.00641464	0.0294438
18162	Npr3	natriuretic peptide receptor 3	-0.500959	-3.57264	0.00642311	0.0294649
80707	Wwox	WW domain-containing oxidoreductase	-0.266422	-3.5725	0.00642444	0.0294649
66109	Tspan13	tetraspanin 13	-0.646267	-3.57052	0.00644391	0.0295422
114874	Ddhd1	DDHD domain containing 1	-0.388201	-3.56969	0.00645204	0.0295675
76365	Tbx18	T-box18	-0.146056	-3.56837	0.00646511	0.0296132
76267	Fads1	fatty acid desaturase 1	-0.425356	-3.56815	0.00646725	0.0296132
21856	Timm44	translocase of inner mitochondrial membrane 44	-0.374194	-3.56711	0.00647751	0.0296362
57344	As3mt	arsenic (+3 oxidation state) methyltransferase	-0.510827	-3.5661	0.00648756	0.0296701
18099	Nlk	nemo like kinase	-0.318325	-3.56101	0.00653809	0.0298562
106344	Rfc4	replication factor C (activator 1) 4	-0.288652	-3.55653	0.00658301	0.0300338
56520	Nme4	NME/NM23 nucleoside diphosphate kinase 4	-0.332762	-3.55562	0.00659219	0.0300636
73738	Haus7	HAUS augmin-like complex, subunit 7	-0.64247	-3.55507	0.00659773	0.0300767
266632	Irak4	interleukin-1 receptor-associated kinase 4	-0.262066	-3.55439	0.00660452	0.0300955
26466	Zfp260	zinc finger protein 260	-0.190145	-3.55399	0.00660859	0.030102
74129	Dmgdh	dimethylglycine dehydrogenase precursor	-0.0761149	-3.54894	0.00665972	0.0303104
12617	Cenpc1	centromere protein C1	-0.283253	-3.54703	0.00667922	0.030387
109079	Sephs1	selenophosphate synthetase 1	-0.410342	-3.54613	0.00668845	0.0304167
64009	Syne1	spectrin repeat containing, nuclear envelope 1	-0.675655	-3.54224	0.0067283	0.0305313
76522	Lsm8	LSM8 homolog, U6 small nuclear RNA associated	-0.255884	-3.5422	0.0067287	0.0305313
12902	Cr2	complement receptor 2	-0.101116	-3.54209	0.00672983	0.0305313
226841	Vash2	vasohibin 2	-0.100755	-3.54115	0.00673952	0.0305629
69790	Med30	mediator complex subunit 30	-0.512769	-3.53948	0.00675674	0.0306165
83409	Lamtor2	late endosomal/lysosomal adaptor, MAPK and MTOR activator 2	-0.609996	-3.53877	0.00676413	0.03063
15182	Hdac2	histone deacetylase 2	-0.307157	-3.53867	0.00676514	0.03063
17388	Mmp15	matrix metallopeptidase 15	-0.536854	-3.53479	0.00680538	0.0307999
218194	Phactr1	phosphatase and actin regulator 1	-0.0692026	-3.53053	0.00684997	0.0309122
66388	Cutc	cutC copper transporter	-0.678651	-3.5298	0.00685764	0.0309122
67892	Coa6	cytochrome c oxidase assembly factor 6	-0.390046	-3.52906	0.00686531	0.0309122
75668	Rasl10a	RAS-like, family 10, member A	-0.391228	-3.52905	0.00686542	0.0309122
270192	Rab6b	RAB6B, member RAS oncogene family	-0.589625	-3.52133	0.00694713	0.031233
21807	Tsc22d1	TSC22 domain family, member 1	-0.515947	-3.52124	0.00694802	0.031233
17999	Nedd4	neural precursor cell expressed, developmentally down-regulated 4	-0.405211	-3.51997	0.00696163	0.0312693
22160	Twist1	twist basic helix-loop-helix transcription factor 1	-0.736638	-3.51929	0.00696887	0.0312894
12033	Bcap29	B cell receptor associated protein 29	-0.326428	-3.51699	0.00699345	0.0313872
27060	Tcirg1	T cell, immune regulator 1, ATPase, H+ transporting, lysosomal V0 protein A3	-0.269626	-3.51648	0.0069989	0.0313992
56794	Hacl1	2-hydroxyacyl-CoA lyase 1	-0.607359	-3.51487	0.00701617	0.0314643
13384	Mpp3	membrane protein, palmitoylated 3 (MAGUK p55 subfamily member 3)	-0.0815093	-3.51393	0.00702627	0.0314965
56046	Uqcc1	ubiquinol-cytochrome c reductase complex assembly factor 1	-0.594754	-3.51369	0.00702893	0.0314965
71529	Kazn	kazrin, periplakin interacting protein	-0.0566663	-3.51221	0.00704485	0.0315429
407823	Baz2b	bromodomain adjacent to zinc finger domain, 2B	-0.289233	-3.51137	0.00705388	0.0315708
22352	Vim	vimentin	-0.667647	-3.50736	0.00709741	0.0317405
101206	Tada3	transcriptional adaptor 3	-0.27991	-3.50668	0.00710487	0.0317613
67210	Gatad1	GATA zinc finger domain containing 1	-0.326654	-3.50626	0.00710937	0.0317689
23917	Impdh1	inosine monophosphate dehydrogenase 1	-0.815834	-3.50549	0.00711777	0.0317938
232086	Tmem150a	transmembrane protein 150A	-0.512315	-3.50335	0.0071412	0.0318607
231801	Agfg2	ArfGAP with FG repeats 2	-0.453531	-3.50212	0.0071547	0.0318958
20661	Sort1	sortilin 1	-0.502945	-3.5017	0.00715925	0.0319035
53601	Pcdh12	protocadherin 12	-0.472531	-3.50106	0.00716633	0.0319225
21821	Ift88	intraflagellar transport 88	-0.319234	-3.49754	0.0072051	0.0320826
12406	Serpinh1	serine (or cysteine) peptidase inhibitor, clade H, member 1	-0.448472	-3.49726	0.00720827	0.032084
50911	Exosc9	exosome component 9	-0.191145	-3.4961	0.00722111	0.03211
14020	Evi5	ecotropic viral integration site 5	-0.213491	-3.49602	0.00722195	0.03211
18759	Prkci	protein kinase C, iota	-0.35799	-3.49596	0.00722262	0.03211
16330	Inpp5b	inositol polyphosphate-5-phosphatase B	-0.234314	-3.49375	0.00724718	0.0321688
67785	Zmym4	zinc finger, MYM-type 4	-0.303159	-3.49375	0.00724721	0.0321688
227095	Hibch	3-hydroxyisobutyryl-Coenzyme A hydrolase	-0.552181	-3.49277	0.00725807	0.0322043
83485	Ngrn	neugrin, neurite outgrowth associated	-0.276547	-3.48929	0.00729698	0.0323635
11303	Abca1	ATP-binding cassette, sub-family A (ABC1), member 1	-0.59118	-3.48905	0.00729966	0.0323635
14712	Gnpat	glyceronephosphate O-acyltransferase	-0.500217	-3.48846	0.00730624	0.0323799
20692	Sparc	secreted acidic cysteine rich glycoprotein	-0.464351	-3.48579	0.00733626	0.0324723
13849	Ephx1	epoxide hydrolase 1, microsomal	-0.63832	-3.48484	0.00734705	0.0324844
72106	Jmjd8	jumonji domain containing 8	-0.589987	-3.48328	0.00736459	0.0325492
269955	Rccd1	RCC1 domain containing 1	-0.379294	-3.48211	0.00737786	0.0325952
13639	Efna4	ephrin A4	-0.140084	-3.48153	0.00738443	0.0326114
71960	Myh14	myosin, heavy polypeptide 14	-0.279407	-3.47872	0.00741637	0.0327142
67290	3110040N11Rik	RIKEN cDNA 3110040N11 gene	-0.638173	-3.47657	0.00744096	0.0327834
14797	Tle5	TLE family member 5, transcriptional modulator	-0.521562	-3.47634	0.00744366	0.0327834
12593	Cdyl	chromodomain protein, Y chromosome-like	-0.232548	-3.47402	0.00747018	0.0328874
23792	Adam23	a disintegrin and metallopeptidase domain 23	-0.293676	-3.47322	0.00747936	0.032915
93891	Pcdhb20	protocadherin beta 20	-0.23392	-3.47049	0.00751085	0.0330408
71947	Tmem94	transmembrane protein 94	-0.352283	-3.46827	0.00753651	0.0331278
66795	Atg10	autophagy related 10	-0.54572	-3.46788	0.00754104	0.0331349
244668	Sipa1l2	signal-induced proliferation-associated 1 like 2	-0.304403	-3.46693	0.00755213	0.0331533
68067	Mrnip	MRN complex interacting protein	-0.227187	-3.46676	0.00755403	0.0331533
67099	Mettl21a	methyltransferase like 21A	-0.369751	-3.46161	0.0076142	0.0333915
234373	Sugp2	SURP and G patch domain containing 2	-0.260108	-3.46108	0.00762038	0.0333927
58202	Nelfb	negative elongation factor complex member B	-0.504925	-3.45792	0.00765748	0.0335293
66736	Emc2	ER membrane protein complex subunit 2	-0.318232	-3.45522	0.00768944	0.0336301
21808	Tgfb2	transforming growth factor, beta 2	-0.132779	-3.45413	0.00770233	0.0336669
17095	Lyl1	lymphoblastomic leukemia 1	-0.31185	-3.45401	0.00770379	0.0336669
17245	Mdm1	transformed mouse 3T3 cell double minute 1	-0.404548	-3.4517	0.0077312	0.0337239
16581	Kifc2	kinesin family member C2	-0.433049	-3.45156	0.00773288	0.0337239
72972	Ccser2	coiled-coil serine rich 2	-0.418249	-3.45156	0.00773292	0.0337239
54451	Cpsf3	cleavage and polyadenylation specificity factor 3	-0.357608	-3.4514	0.00773473	0.0337239
94181	Nans	N-acetylneuraminic acid synthase (sialic acid synthase)	-0.225958	-3.45021	0.007749	0.0337731
93887	Pcdhb16	protocadherin beta 16	-0.302835	-3.44904	0.00776292	0.0338207
69270	Gins1	GINS complex subunit 1 (Psf1 homolog)	-0.377296	-3.44877	0.00776621	0.033822
15466	Hrh2	histamine receptor H2	-0.346948	-3.4476	0.00778016	0.0338697
22388	Wdr1	WD repeat domain 1	-0.372883	-3.44722	0.00778469	0.0338764
15400	Hoxa3	homeobox A3	-0.160432	-3.44429	0.00781999	0.0339846
68196	Hsbp1	heat shock factor binding protein 1	-0.370213	-3.4437	0.0078271	0.0339893
73737	1110008P14Rik	RIKEN cDNA 1110008P14 gene	-0.686391	-3.44357	0.00782866	0.0339893
21846	Tie1	tyrosine kinase with immunoglobulin-like and EGF-like domains 1	-0.655197	-3.44196	0.00784804	0.0340604
22275	Urod	uroporphyrinogen decarboxylase	-0.421545	-3.43935	0.00787975	0.0341849
17193	Mbd4	methyl-CpG binding domain protein 4	-0.120819	-3.43793	0.00789697	0.0342464
74761	Mxra8	matrix-remodelling associated 8	-0.40072	-3.43552	0.00792645	0.0343611
20530	Slc31a2	solute carrier family 31, member 2	-0.483585	-3.43313	0.00795573	0.0344616
652925	Tmem243	transmembrane protein 243, mitochondrial	-0.412062	-3.43044	0.00798874	0.0345781
272027	Tstd2	thiosulfate sulfurtransferase (rhodanese)-like domain containing 2	-0.262187	-3.4294	0.00800157	0.0345858
23831	Car14	carbonic anhydrase 14	-0.752163	-3.42931	0.00800275	0.0345858
74108	Parn	poly(A)-specific ribonuclease (deadenylation nuclease)	-0.457017	-3.4286	0.0080114	0.034602
22059	Trp53	transformation related protein 53	-0.210264	-3.42851	0.00801262	0.034602
12877	Cpeb1	cytoplasmic polyadenylation element binding protein 1	-0.437227	-3.42786	0.0080206	0.0346233
192185	Nadk	NAD kinase	-0.377425	-3.42673	0.00803457	0.0346704
212632	Iffo2	intermediate filament family orphan 2	-0.341985	-3.42573	0.00804707	0.0347093
18130	Ints6	integrator complex subunit 6	-0.323442	-3.42551	0.00804974	0.0347093
66962	Swsap1	SWIM type zinc finger 7 associated protein 1	-0.549917	-3.42442	0.00806324	0.0347543
54712	Plxnc1	plexin C1	-0.20468	-3.42414	0.00806682	0.0347565
97287	Mtmr14	myotubularin related protein 14	-0.553711	-3.42256	0.00808651	0.0348246
70561	Txndc16	thioredoxin domain containing 16	-0.203846	-3.41945	0.00812539	0.0349547
80898	Erap1	endoplasmic reticulum aminopeptidase 1	-0.326112	-3.41941	0.00812596	0.0349547
14871	Gstt1	glutathione S-transferase, theta 1	-0.644671	-3.41922	0.00812827	0.0349547
67103	Ptgr1	prostaglandin reductase 1	-0.303334	-3.41821	0.00814093	0.0349958
56726	Sh3bgrl	SH3-binding domain glutamic acid-rich protein like	-0.462578	-3.41468	0.0081855	0.0351473
110355	Grk2	G protein-coupled receptor kinase 2	-0.263141	-3.41328	0.00820324	0.0351889
22678	Zfp2	zinc finger protein 2	-0.286408	-3.41191	0.00822055	0.0352309
66834	Acot13	acyl-CoA thioesterase 13	-0.244462	-3.41109	0.00823104	0.0352611
384281	Gatc	glutamyl-tRNA(Gln) amidotransferase, subunit C	-0.360167	-3.40975	0.00824801	0.035291
16205	Gimap1	GTPase, IMAP family member 1	-0.228521	-3.4078	0.00827289	0.0353614
76192	Abhd12	abhydrolase domain containing 12	-0.347088	-3.40569	0.00829997	0.035437
73804	Kif2c	kinesin family member 2C	-0.0611542	-3.40286	0.0083363	0.0355535
68953	Chmp2a	charged multivesicular body protein 2A	-0.260387	-3.40244	0.0083417	0.0355535
103140	Gstt3	glutathione S-transferase, theta 3	-0.49277	-3.40192	0.00834843	0.0355535
74105	Gga2	golgi associated, gamma adaptin ear containing, ARF binding protein 2	-0.383635	-3.40186	0.00834926	0.0355535
320595	Phf8	PHD finger protein 8	-0.235017	-3.40112	0.00835876	0.0355601
12576	Cdkn1b	cyclin-dependent kinase inhibitor 1B	-0.454139	-3.40101	0.00836025	0.0355601
19718	Rfc2	replication factor C (activator 1) 2	-0.380065	-3.39566	0.00842971	0.0358017
66966	Trit1	tRNA isopentenyltransferase 1	-0.371616	-3.39451	0.00844469	0.0358519
57874	Hacd3	3-hydroxyacyl-CoA dehydratase 3	-0.498826	-3.3928	0.00846703	0.0359198
20347	Sema3b	sema domain, immunoglobulin domain (Ig), short basic domain, secreted, (semaphorin) 3B	-0.339209	-3.39166	0.00848195	0.0359561
15193	Hdgfl2	HDGF like 2	-0.39173	-3.39005	0.00850309	0.0360322
70239	Gtf3c5	general transcription factor IIIC, polypeptide 5	-0.315238	-3.38887	0.00851867	0.0360712
75669	Pik3r4	phosphoinositide-3-kinase regulatory subunit 4	-0.324485	-3.38649	0.00855007	0.0361681
19377	Rai1	retinoic acid induced 1	-0.233079	-3.38589	0.00855806	0.0361782
12038	Bche	butyrylcholinesterase	-0.331002	-3.38144	0.0086172	0.036393
22295	Cdh23	cadherin 23 (otocadherin)	-0.165271	-3.37876	0.00865304	0.0365035
212670	Catsper2	cation channel, sperm associated 2	-0.274177	-3.37796	0.00866377	0.0365351
18717	Pip5k1c	phosphatidylinositol-4-phosphate 5-kinase, type 1 gamma	-0.320912	-3.37726	0.00867316	0.0365611
66940	Shisa5	shisa family member 5	-0.611309	-3.37685	0.00867863	0.0365705
67856	Echdc3	enoyl Coenzyme A hydratase domain containing 3	-0.565393	-3.37356	0.00872307	0.0367441
13361	Dhfr	dihydrofolate reductase	-0.253742	-3.37275	0.008734	0.0367764
66395	Ahnak	AHNAK nucleoprotein (desmoyokin)	-0.438621	-3.36971	0.00877523	0.0369088
69666	Psmg4	proteasome (prosome, macropain) assembly chaperone 4	-0.402229	-3.36751	0.00880515	0.0369978
53627	Porcn	porcupine O-acyltransferase	-0.432194	-3.36473	0.00884315	0.0370979
71801	Plekhf2	pleckstrin homology domain containing, family F (with FYVE domain) member 2	-0.39451	-3.36429	0.00884928	0.0371099
66599	Rdm1	RAD52 motif 1	-0.565302	-3.36263	0.0088721	0.037189
18751	Prkcb	protein kinase C, beta	-0.195204	-3.36244	0.00887472	0.037189
72655	Snhg5	small nucleolar RNA host gene 5	-0.342927	-3.36121	0.00889157	0.0372281
66870	Serbp1	serpine1 mRNA binding protein 1	-0.197565	-3.36104	0.00889393	0.0372281
98365	Slamf9	SLAM family member 9	-0.525039	-3.35827	0.00893225	0.037347
14924	Magi1	membrane associated guanylate kinase, WW and PDZ domain containing 1	-0.1979	-3.35737	0.00894477	0.037378
223254	Farp1	FERM, RhoGEF (Arhgef) and pleckstrin domain protein 1 (chondrocyte-derived)	-0.415478	-3.35273	0.00900929	0.0375996
69190	Dym	dymeclin	-0.445168	-3.351	0.00903362	0.0376734
74016	Phf19	PHD finger protein 19	-0.317443	-3.3493	0.00905739	0.0377483
233406	Prc1	protein regulator of cytokinesis 1	-0.101517	-3.34924	0.00905826	0.0377483
29815	Bcar3	breast cancer anti-estrogen resistance 3	-0.500561	-3.34483	0.00912044	0.0379655
20587	Smarcb1	SWI/SNF related, matrix associated, actin dependent regulator of chromatin, subfamily b, member 1	-0.294702	-3.34458	0.00912408	0.0379666
22323	Vasp	vasodilator-stimulated phosphoprotein	-0.180192	-3.34359	0.00913804	0.0379828
68055	Dmac2l	distal membrane arm assembly complex 2 like	-0.648093	-3.34282	0.00914902	0.0380055
69202	Ptms	parathymosin	-0.800176	-3.34273	0.00915023	0.0380055
108958	Miga2	mitoguardin 2	-0.533949	-3.34247	0.009154	0.0380072
73181	Nfatc4	nuclear factor of activated T cells, cytoplasmic, calcineurin dependent 4	-0.295127	-3.34182	0.00916321	0.0380176
64292	Ptges	prostaglandin E synthase	-0.791072	-3.3367	0.0092364	0.0382511
234356	Csgalnact1	chondroitin sulfate N-acetylgalactosaminyltransferase 1	-0.361258	-3.33623	0.0092431	0.0382648
104771	Jkamp	JNK1/MAPK8-associated membrane protein	-0.279522	-3.33439	0.00926956	0.0383463
57432	Zc3h8	zinc finger CCCH type containing 8	-0.497586	-3.33285	0.00929178	0.0384241
109145	Gins4	GINS complex subunit 4 (Sld5 homolog)	-0.386704	-3.32994	0.00933385	0.0385418
230767	Iqcc	IQ motif containing C	-0.498705	-3.32794	0.00936288	0.0386357
70445	Cd248	CD248 antigen, endosialin	-0.467486	-3.3277	0.00936642	0.0386357
72832	Crtac1	cartilage acidic protein 1	-0.177155	-3.32472	0.00940996	0.0387852
16164	Il13ra1	interleukin 13 receptor, alpha 1	-0.207048	-3.32211	0.00944822	0.0389287
246198	Mllt6	myeloid/lymphoid or mixed-lineage leukemia; translocated to, 6	-0.504253	-3.32144	0.00945812	0.0389553
17534	Mrc2	mannose receptor, C type 2	-0.286494	-3.31888	0.00949583	0.0390822
76482	Rmc1	regulator of MON1-CCZ1	-0.402065	-3.31815	0.00950654	0.039112
64050	Yeats4	YEATS domain containing 4	-0.414302	-3.31787	0.00951072	0.039115
15937	Ier3	immediate early response 3	-0.817536	-3.31501	0.00955311	0.0392465
104103	Airn	antisense Igf2r RNA	-0.32819	-3.31468	0.00955804	0.0392525
14664	Slc6a9	solute carrier family 6 (neurotransmitter transporter, glycine), member 9	-0.0731047	-3.31349	0.00957578	0.0393111
14998	H2-DMa	histocompatibility 2, class II, locus DMa	-0.616719	-3.31286	0.00958507	0.039335
214932	Hdhd5	haloacid dehalogenase like hydrolase domain containing 5	-0.286653	-3.30973	0.00963193	0.0395129
69833	Polr2f	polymerase (RNA) II (DNA directed) polypeptide F	-0.392484	-3.30825	0.00965408	0.0395827
50770	Atp11a	ATPase, class VI, type 11A	-0.299505	-3.30813	0.00965595	0.0395827
23871	Ets1	E26 avian leukemia oncogene 1, 5' domain	-0.49422	-3.30439	0.00971226	0.0397485
17390	Mmp2	matrix metallopeptidase 2	-0.702789	-3.29857	0.0098008	0.0400604
27965	Spg21	SPG21, maspardin	-0.349443	-3.29691	0.0098261	0.0401493
268882	Fbxo45	F-box protein 45	-0.443506	-3.29583	0.00984272	0.0401733
223337	Ugt3a2	UDP glycosyltransferases 3 family, polypeptide A2	-0.0910679	-3.29578	0.00984349	0.0401733
19082	Prkag1	protein kinase, AMP-activated, gamma 1 non-catalytic subunit	-0.416875	-3.29577	0.00984362	0.0401733
20868	Stk10	serine/threonine kinase 10	-0.259505	-3.2956	0.00984618	0.0401733
69870	Polr3gl	polymerase (RNA) III (DNA directed) polypeptide G like	-0.682731	-3.29523	0.00985186	0.0401819
12834	Col6a2	collagen, type VI, alpha 2	-0.632016	-3.29489	0.00985715	0.040189
72931	Swi5	SWI5 recombination repair homolog (yeast)	-0.43621	-3.2929	0.00988768	0.040299
12393	Runx2	runt related transcription factor 2	-0.0711332	-3.29234	0.00989633	0.0403197
386463	Cdsn	corneodesmosin	-0.617699	-3.28981	0.00993547	0.0404646
30941	Usp21	ubiquitin specific peptidase 21	-0.347117	-3.28726	0.00997509	0.0405835
24058	Sigirr	single immunoglobulin and toll-interleukin 1 receptor (TIR) domain	-0.389524	-3.2869	0.00998062	0.0405835
12478	Cd19	CD19 antigen	-0.0886883	-3.28677	0.00998262	0.0405835
56079	Astn2	astrotactin 2	-0.0834237	-3.28608	0.00999339	0.0406026
14373	G0s2	G0/G1 switch gene 2	-0.863005	-3.28468	0.0100152	0.0406721
110911	Cds2	CDP-diacylglycerol synthase (phosphatidate cytidylyltransferase) 2	-0.356747	-3.2841	0.0100243	0.0406945
76843	Dtl	denticleless E3 ubiquitin protein ligase	-0.120929	-3.28199	0.0100573	0.0407993
66179	Ogfod3	2-oxoglutarate and iron-dependent oxygenase domain containing 3	-0.341283	-3.28	0.0100885	0.0408995
12696	Cirbp	cold inducible RNA binding protein	-0.459245	-3.27986	0.0100907	0.0408995
72503	2610507B11Rik	RIKEN cDNA 2610507B11 gene	-0.417474	-3.27954	0.0100959	0.0408995
26879	B3galnt1	UDP-GalNAc:betaGlcNAc beta 1,3-galactosaminyltransferase, polypeptide 1	-0.651581	-3.2795	0.0100965	0.0408995
20909	Stx4a	syntaxin 4A (placental)	-0.492195	-3.27927	0.0101001	0.0408995
22235	Ugdh	UDP-glucose dehydrogenase	-0.242746	-3.27768	0.0101252	0.0409863
231130	Tnip2	TNFAIP3 interacting protein 2	-0.203792	-3.27477	0.0101713	0.0411121
19765	Ralbp1	ralA binding protein 1	-0.45328	-3.2741	0.0101819	0.0411275
230376	Haus6	HAUS augmin-like complex, subunit 6	-0.269053	-3.27354	0.0101908	0.041149
67286	Ift22	intraflagellar transport 22	-0.41908	-3.27319	0.0101964	0.0411567
319196	Ankef1	ankyrin repeat and EF-hand domain containing 1	-0.441306	-3.27063	0.0102371	0.0412918
76498	Paqr4	progestin and adipoQ receptor family member IV	-0.324953	-3.26992	0.0102485	0.0413227
20230	Satb1	special AT-rich sequence binding protein 1	-0.158522	-3.26933	0.0102579	0.0413367
56220	Zfp386	zinc finger protein 386 (Kruppel-like)	-0.306505	-3.26912	0.0102613	0.0413367
117600	Srgap1	SLIT-ROBO Rho GTPase activating protein 1	-0.118512	-3.26902	0.0102629	0.0413367
105428	Fam149b	family with sequence similarity 149, member B	-0.386796	-3.26556	0.0103184	0.0415011
27059	Sh3d19	SH3 domain protein D19	-0.298834	-3.26325	0.0103557	0.0416364
66056	Zfp524	zinc finger protein 524	-0.496792	-3.26269	0.0103649	0.0416436
17172	Ascl1	achaete-scute family bHLH transcription factor 1	-0.346013	-3.25946	0.0104173	0.0418243
84036	Kcnn1	potassium intermediate/small conductance calcium-activated channel, subfamily N, member 1	-0.334775	-3.25824	0.0104371	0.0418892
13619	Phc1	polyhomeotic 1	-0.187612	-3.25784	0.0104436	0.0419002
18604	Pdk2	pyruvate dehydrogenase kinase, isoenzyme 2	-0.472249	-3.25634	0.0104681	0.041954
16985	Lsp1	lymphocyte specific 1	-0.339748	-3.25536	0.0104842	0.0420037
11544	Adprh	ADP-ribosylarginine hydrolase	-0.46103	-3.25408	0.0105052	0.0420578
20256	Clec11a	C-type lectin domain family 11, member a	-0.29818	-3.25316	0.0105203	0.0420728
74245	Ctbs	chitobiase	-0.457983	-3.25273	0.0105273	0.0420728
234582	Ccdc102a	coiled-coil domain containing 102A	-0.303704	-3.24774	0.0106097	0.0423683
21453	Tcof1	treacle ribosome biogenesis factor 1	-0.199531	-3.24734	0.0106164	0.0423683
14272	Fnta	farnesyltransferase, CAAX box, alpha	-0.348289	-3.2458	0.010642	0.0424373
15248	Hic1	hypermethylated in cancer 1	-0.271724	-3.24562	0.010645	0.0424373
72157	Pgm2	phosphoglucomutase 2	-0.441115	-3.24477	0.0106592	0.042479
217371	Rab40b	Rab40B, member RAS oncogene family	-0.509706	-3.24389	0.0106738	0.0425098
110796	Tshz1	teashirt zinc finger family member 1	-0.287388	-3.24385	0.0106744	0.0425098
104158	Ces1d	carboxylesterase 1D	-0.610376	-3.24276	0.0106928	0.0425678
14972	H2-K1	histocompatibility 2, K1, K region	-0.499825	-3.2409	0.0107238	0.0426765
54486	Hpgds	hematopoietic prostaglandin D synthase	-0.266628	-3.2403	0.010734	0.0427018
58875	Hibadh	3-hydroxyisobutyrate dehydrogenase	-0.345256	-3.23917	0.0107528	0.0427467
207781	C2cd2	C2 calcium-dependent domain containing 2	-0.407597	-3.23796	0.0107733	0.0427981
270118	Maml2	mastermind like transcriptional coactivator 2	-0.202704	-3.23567	0.0108119	0.0429363
80719	Igsf6	immunoglobulin superfamily, member 6	-0.269751	-3.23347	0.0108492	0.0430391
11629	Aif1	allograft inflammatory factor 1	-0.504328	-3.233	0.0108572	0.0430557
20460	Stil	Scl/Tal1 interrupting locus	-0.0693386	-3.23224	0.0108702	0.0430921
77219	Ptgr2	prostaglandin reductase 2	-0.345714	-3.23035	0.0109023	0.0431891
67203	Nde1	nudE neurodevelopment protein 1	-0.300947	-3.22954	0.0109161	0.0431912
68631	Cryl1	crystallin, lambda 1	-0.857379	-3.22942	0.0109181	0.0431912
223921	Aaas	achalasia, adrenocortical insufficiency, alacrimia	-0.450554	-3.22808	0.0109411	0.0432672
52477	Angel2	angel homolog 2	-0.443743	-3.22733	0.010954	0.043303
170439	Elovl6	ELOVL family member 6, elongation of long chain fatty acids (yeast)	-0.365424	-3.22653	0.0109677	0.043342
17766	Nudt1	nudix (nucleoside diphosphate linked moiety X)-type motif 1	-0.560989	-3.22504	0.0109933	0.043428
84111	Gpr87	G protein-coupled receptor 87	-0.456117	-3.22355	0.0110189	0.043514
70359	Gtpbp3	GTP binding protein 3	-0.399505	-3.22268	0.011034	0.043543
65960	Twsg1	twisted gastrulation BMP signaling modulator 1	-0.376574	-3.21994	0.0110814	0.0436998
107526	Gimap4	GTPase, IMAP family member 4	-0.406798	-3.21965	0.0110864	0.0437035
50996	Pdcd7	programmed cell death 7	-0.442082	-3.21938	0.0110912	0.0437035
17216	Mcm2	minichromosome maintenance complex component 2	-0.220323	-3.21922	0.011094	0.0437035
17217	Mcm4	minichromosome maintenance complex component 4	-0.314819	-3.2181	0.0111134	0.0437591
18294	Ogg1	8-oxoguanine DNA-glycosylase 1	-0.360955	-3.21774	0.0111197	0.0437591
73666	Thoc3	THO complex 3	-0.293621	-3.21728	0.0111277	0.0437754
338359	Supv3l1	suppressor of var1, 3-like 1 (S. cerevisiae)	-0.341643	-3.21561	0.0111568	0.0438594
13972	Gnb1l	guanine nucleotide binding protein (G protein), beta polypeptide 1-like	-0.146141	-3.21477	0.0111716	0.0438839
67711	Nsmce1	NSE1 homolog, SMC5-SMC6 complex component	-0.544572	-3.21434	0.0111791	0.043886
13032	Ctsc	cathepsin C	-0.787034	-3.21068	0.0112433	0.0441073
15461	Hras	Harvey rat sarcoma virus oncogene	-0.36826	-3.20994	0.0112563	0.0441433
16513	Kcnj10	potassium inwardly-rectifying channel, subfamily J, member 10	-0.0487338	-3.20785	0.0112933	0.0442575
15170	Ptpn6	protein tyrosine phosphatase, non-receptor type 6	-0.322622	-3.20493	0.0113452	0.0443992
77044	Arid2	AT rich interactive domain 2 (ARID, RFX-like)	-0.288678	-3.2016	0.0114045	0.0445851
71538	Fbxo9	f-box protein 9	-0.583241	-3.19921	0.0114472	0.0447367
66153	Fbxo36	F-box protein 36	-0.451271	-3.19765	0.0114753	0.0448266
12021	Bard1	BRCA1 associated RING domain 1	-0.0808221	-3.19533	0.0115172	0.0449334
19684	Rdx	radixin	-0.366822	-3.19532	0.0115174	0.0449334
66071	Ethe1	ethylmalonic encephalopathy 1	-0.501947	-3.19291	0.011561	0.0450723
20878	Aurka	aurora kinase A	-0.222925	-3.19233	0.0115714	0.0450926
59052	Mettl9	methyltransferase like 9	-0.379045	-3.19218	0.0115742	0.0450926
13058	Cybb	cytochrome b-245, beta polypeptide	-0.623009	-3.19122	0.0115918	0.0451456
22596	Xrcc5	X-ray repair complementing defective repair in Chinese hamster cells 5	-0.500058	-3.19079	0.0115995	0.0451604
16508	Kcnd2	potassium voltage-gated channel, Shal-related family, member 2	-0.160539	-3.19015	0.0116111	0.0451817
28109	D10Wsu102e	DNA segment, Chr 10, Wayne State University 102, expressed	-0.296806	-3.19005	0.011613	0.0451817
19222	Ptgir	prostaglandin I receptor (IP)	-0.236235	-3.18784	0.0116533	0.045317
53893	Nudt5	nudix (nucleoside diphosphate linked moiety X)-type motif 5	-0.365879	-3.1877	0.0116558	0.045317
94279	Sfxn2	sideroflexin 2	-0.351759	-3.18616	0.011684	0.0453955
67211	Armc10	armadillo repeat containing 10	-0.416443	-3.18553	0.0116957	0.0454098
105689	Mycbp2	MYC binding protein 2, E3 ubiquitin protein ligase	-0.328187	-3.17881	0.0118197	0.0458441
214111	Slc24a1	solute carrier family 24 (sodium/potassium/calcium exchanger), member 1	-0.0812405	-3.17609	0.0118703	0.0460244
65945	Clstn1	calsyntenin 1	-0.496915	-3.17524	0.0118861	0.0460479
12722	Clca3a1	chloride channel accessory 3A1	-0.189613	-3.17308	0.0119264	0.0461313
52392	D1Ertd622e	DNA segment, Chr 1, ERATO Doi 622, expressed	-0.227586	-3.17286	0.0119306	0.0461317
170639	Olfr78	olfactory receptor 78	-0.192587	-3.17258	0.0119359	0.0461364
89867	Sec16b	SEC16 homolog B (S. cerevisiae)	-0.203171	-3.17165	0.0119533	0.0461838
59044	Rnf130	ring finger protein 130	-0.480592	-3.17074	0.0119704	0.0462093
56316	Ggcx	gamma-glutamyl carboxylase	-0.528827	-3.17057	0.0119736	0.0462093
23945	Mgll	monoglyceride lipase	-0.490768	-3.17049	0.0119752	0.0462093
192120	Bspry	B-box and SPRY domain containing	-0.167457	-3.16901	0.012003	0.0462549
225207	Zfp521	zinc finger protein 521	-0.174471	-3.16899	0.0120034	0.0462549
18081	Ninj1	ninjurin 1	-0.498645	-3.1683	0.0120164	0.0462892
66086	Fopnl	Fgfr1op N-terminal like	-0.522319	-3.16684	0.0120439	0.0463657
53422	Ybx2	Y box protein 2	-0.496028	-3.1667	0.0120466	0.0463657
272322	Arntl2	aryl hydrocarbon receptor nuclear translocator-like 2	-0.256359	-3.1666	0.0120485	0.0463657
269831	Tspan12	tetraspanin 12	-0.380166	-3.1652	0.0120751	0.0464363
223774	Alg12	asparagine-linked glycosylation 12 (alpha-1,6-mannosyltransferase)	-0.379838	-3.16214	0.0121334	0.046597
13807	Eno2	enolase 2, gamma neuronal	-0.108387	-3.16192	0.0121375	0.046597
109778	Blvra	biliverdin reductase A	-0.443983	-3.15799	0.0122128	0.0468702
230027	Coq3	coenzyme Q3 methyltransferase	-0.260669	-3.15671	0.0122373	0.0469167
11481	Acvr2b	activin receptor IIB	-0.206893	-3.15612	0.0122487	0.0469387
319885	Zcchc7	zinc finger, CCHC domain containing 7	-0.142744	-3.15592	0.0122526	0.0469387
67445	C1qtnf4	C1q and tumor necrosis factor related protein 4	-0.376179	-3.15576	0.0122555	0.0469387
74776	Ppa2	pyrophosphatase (inorganic) 2	-0.393205	-3.14868	0.0123929	0.0474006
72621	Pdzd11	PDZ domain containing 11	-0.366793	-3.1478	0.01241	0.0474499
232811	Kmt5c	lysine methyltransferase 5C	-0.536342	-3.14664	0.0124327	0.0475047
21388	Tbx5	T-box 5	-0.325929	-3.14423	0.0124799	0.047669
17160	Man2b2	mannosidase 2, alpha B2	-0.439262	-3.14373	0.0124897	0.0476901
56407	Trpc4ap	transient receptor potential cation channel, subfamily C, member 4 associated protein	-0.326795	-3.14072	0.012549	0.0478683
230661	Tesk2	testis-specific kinase 2	-0.286456	-3.13997	0.0125638	0.0479084
320078	Olfml2b	olfactomedin-like 2B	-0.334114	-3.13951	0.0125729	0.047927
234729	Vac14	Vac14 homolog (S. cerevisiae)	-0.582576	-3.13799	0.012603	0.0480256
18749	Prkacb	protein kinase, cAMP dependent, catalytic, beta	-0.344089	-3.13585	0.0126456	0.0481391
231633	Tmem119	transmembrane protein 119	-0.290634	-3.13259	0.0127107	0.0483547
212508	Mtg1	mitochondrial ribosome-associated GTPase 1	-0.372256	-3.13186	0.0127254	0.0483777
67009	Ttc23	tetratricopeptide repeat domain 23	-0.374831	-3.13062	0.0127503	0.0484289
101831	Faap24	Fanconi anemia core complex associated protein 24	-0.280813	-3.12921	0.0127785	0.0485146
68117	Apool	apolipoprotein O-like	-0.34679	-3.12874	0.012788	0.0485345
104086	Cyp27a1	cytochrome P450, family 27, subfamily a, polypeptide 1	-0.430153	-3.12695	0.012824	0.0486547
22594	Xrcc1	X-ray repair complementing defective repair in Chinese hamster cells 1	-0.510164	-3.12586	0.0128462	0.0487225
27375	Tjp3	tight junction protein 3	-0.403768	-3.12501	0.0128634	0.0487714
18597	Pdha1	pyruvate dehydrogenase E1 alpha 1	-0.320819	-3.12305	0.0129032	0.0488731
103236	Csnk1g2	casein kinase 1, gamma 2	-0.379885	-3.1216	0.0129327	0.0489685
11945	Atp4b	ATPase, H+/K+ exchanging, beta polypeptide	-0.621183	-3.12104	0.0129442	0.0489792
18016	Nf2	neurofibromin 2	-0.371697	-3.12087	0.0129475	0.0489792
268566	Gphn	gephyrin	-0.423997	-3.12082	0.0129485	0.0489792
70503	Ddo	D-aspartate oxidase	-0.629037	-3.12031	0.0129589	0.0490022
12927	Bcar1	breast cancer anti-estrogen resistance 1	-0.360124	-3.11923	0.012981	0.0490691
18973	Pole	polymerase (DNA directed), epsilon	-0.0672827	-3.11893	0.0129871	0.049076
21894	Tln1	talin 1	-0.474208	-3.11807	0.0130048	0.0491239
50850	Spast	spastin	-0.339996	-3.11775	0.0130114	0.0491239
52184	Odf2l	outer dense fiber of sperm tails 2-like	-0.339525	-3.11768	0.0130128	0.0491239
16348	Invs	inversin	-0.145692	-3.11746	0.0130172	0.0491241
20168	Rtn3	reticulon 3	-0.270085	-3.11703	0.0130261	0.0491413
75221	Dpp3	dipeptidylpeptidase 3	-0.569389	-3.11674	0.0130322	0.0491477
20873	Plk4	polo like kinase 4	-0.246672	-3.11609	0.0130454	0.0491811
77827	Krba1	KRAB-A domain containing 1	-0.354549	-3.11543	0.0130591	0.0492163
11517	Adcyap1r1	adenylate cyclase activating polypeptide 1 receptor 1	-0.20252	-3.11521	0.0130636	0.0492171
67451	Pkp2	plakophilin 2	-0.259943	-3.1149	0.01307	0.0492245
69090	Ascc1	activating signal cointegrator 1 complex subunit 1	-0.540373	-3.11353	0.0130981	0.0493143
55943	Stx8	syntaxin 8	-0.285272	-3.11303	0.0131086	0.0493371
100764	Rita1	RBPJ interacting and tubulin associated 1	-0.300985	-3.11246	0.0131203	0.0493647
170625	Snx18	sorting nexin 18	-0.425141	-3.11222	0.0131253	0.049367
13006	Smc3	structural maintenance of chromosomes 3	-0.306355	-3.11147	0.0131409	0.0493929
320727	Ipo8	importin 8	-0.300796	-3.11073	0.0131563	0.0494179
170767	Rfxap	regulatory factor X-associated protein	-0.275632	-3.1101	0.0131693	0.0494487
11684	Alox12	arachidonate 12-lipoxygenase	-0.141859	-3.10991	0.0131732	0.0494487
30933	Tor2a	torsin family 2, member A	-0.578592	-3.10946	0.0131825	0.0494508
67454	Ikbip	IKBKB interacting protein	-0.397797	-3.1084	0.0132046	0.0495171
71838	Phf7	PHD finger protein 7	-0.321561	-3.10709	0.0132318	0.049603
72355	Cdpf1	cysteine rich, DPF motif domain containing 1	-0.498798	-3.10534	0.0132685	0.0497076
69745	Pold4	polymerase (DNA-directed), delta 4	-0.682149	-3.10499	0.0132757	0.0497179
12649	Chek1	checkpoint kinase 1	-0.094198	-3.10455	0.013285	0.0497362
20430	Cyfip1	cytoplasmic FMR1 interacting protein 1	-0.404387	-3.10348	0.0133075	0.0497932
17756	Map2	microtubule-associated protein 2	-0.13246	-3.10238	0.0133305	0.0498573
70240	Ufsp1	UFM1-specific peptidase 1	-0.685789	-3.10173	0.0133441	0.0498885
93893	Pcdhb22	protocadherin beta 22	-0.306547	-3.10157	0.0133477	0.0498885
12449	Ccnf	cyclin F	-0.0902765	-3.10124	0.0133545	0.0498975
235339	Dlat	dihydrolipoamide S-acetyltransferase (E2 component of pyruvate dehydrogenase complex)	-0.378935	-3.09678	0.0134488	0.0501668
52653	Nudcd2	NudC domain containing 2	-0.30564	-3.09583	0.013469	0.0502257
81909	Zfpl1	zinc finger like protein 1	-0.291821	-3.0946	0.0134952	0.0503067
19277	Ptpro	protein tyrosine phosphatase, receptor type, O	-0.116967	-3.09352	0.0135182	0.0503592
15412	Hoxb4	homeobox B4	-0.298761	-3.09209	0.0135489	0.0504569
66911	Nudt16l1	nudix (nucleoside diphosphate linked moiety X)-type motif 16-like 1	-0.796114	-3.09129	0.0135659	0.0505037
67063	Tmem246	transmembrane protein 246	-0.400509	-3.08848	0.0136261	0.0506945
17420	Mnat1	menage a trois 1	-0.243039	-3.08639	0.0136712	0.0507957
71985	Acad10	acyl-Coenzyme A dehydrogenase family, member 10	-0.441133	-3.08639	0.0136713	0.0507957
212483	Fam193b	family with sequence similarity 193, member B	-0.449006	-3.08459	0.0137101	0.0509233
66412	Arrdc4	arrestin domain containing 4	-0.370746	-3.08329	0.0137383	0.0510112
16826	Ldb2	LIM domain binding 2	-0.272331	-3.08255	0.0137544	0.0510256
66171	Pgls	6-phosphogluconolactonase	-0.551915	-3.08207	0.0137649	0.0510256
67712	Slc25a37	solute carrier family 25, member 37	-0.240865	-3.08192	0.0137682	0.0510256
13051	Cx3cr1	chemokine (C-X3-C motif) receptor 1	-0.288637	-3.08187	0.0137693	0.0510256
16970	Lrmp	lymphoid-restricted membrane protein	-0.210053	-3.0806	0.0137967	0.0510881
69459	Ubl7	ubiquitin-like 7 (bone marrow stromal cell-derived)	-0.459239	-3.08047	0.0137997	0.0510881
12983	Csf2rb	colony stimulating factor 2 receptor, beta, low-affinity (granulocyte-macrophage)	-0.285163	-3.07876	0.0138369	0.0512093
24111	Uts2	urotensin 2	-0.403015	-3.07802	0.0138531	0.0512525
67241	Smc6	structural maintenance of chromosomes 6	-0.416252	-3.07473	0.0139253	0.0514914
14938	Gzma	granzyme A	-0.469987	-3.07455	0.0139293	0.0514914
231004	Samd11	sterile alpha motif domain containing 11	-0.0911347	-3.07428	0.0139352	0.0514914
69810	Clec4b1	C-type lectin domain family 4, member b1	-0.310627	-3.07413	0.0139385	0.0514914
70153	2210016F16Rik	RIKEN cDNA 2210016F16 gene	-0.458831	-3.07404	0.0139405	0.0514914
76824	Mtfr1l	mitochondrial fission regulator 1-like	-0.371085	-3.07264	0.0139715	0.0515555
171212	Galnt10	polypeptide N-acetylgalactosaminyltransferase 10	-0.244577	-3.0723	0.0139789	0.051566
11769	Ap1s1	adaptor protein complex AP-1, sigma 1	-0.280604	-3.07041	0.0140209	0.0516607
14583	Gfpt1	glutamine fructose-6-phosphate transaminase 1	-0.241242	-3.06954	0.01404	0.0516902
110826	Etfb	electron transferring flavoprotein, beta polypeptide	-0.540669	-3.06926	0.0140463	0.0516968
19076	Prim2	DNA primase, p58 subunit	-0.392646	-3.06876	0.0140574	0.0517206
53412	Ppp1r3c	protein phosphatase 1, regulatory subunit 3C	-1.00882	-3.06728	0.0140903	0.0518081
75731	Idnk	idnK gluconokinase homolog (E. coli)	-0.102933	-3.06656	0.0141064	0.0518505
26433	Plod3	procollagen-lysine, 2-oxoglutarate 5-dioxygenase 3	-0.389512	-3.06588	0.0141216	0.0518895
18021	Nfatc3	nuclear factor of activated T cells, cytoplasmic, calcineurin dependent 3	-0.275642	-3.06412	0.0141609	0.0520168
75422	Mettl5	methyltransferase like 5	-0.381846	-3.06375	0.0141691	0.0520301
56212	Rhog	ras homolog family member G	-0.319765	-3.0607	0.0142376	0.0522475
66205	Cd302	CD302 antigen	-0.47977	-3.05905	0.0142747	0.0523461
192196	Luc7l2	LUC7-like 2 (S. cerevisiae)	-0.284297	-3.0589	0.0142783	0.0523461
26456	Sema4g	sema domain, immunoglobulin domain (Ig), transmembrane domain (TM) and short cytoplasmic domain, (semaphorin) 4G	-0.126182	-3.05836	0.0142905	0.0523738
20318	Sdf4	stromal cell derived factor 4	-0.372715	-3.05196	0.0144358	0.0528171
12772	Ccr2	chemokine (C-C motif) receptor 2	-0.703234	-3.05119	0.0144535	0.0528171
18176	Nras	neuroblastoma ras oncogene	-0.297488	-3.05071	0.0144645	0.0528404
18302	Oit3	oncoprotein induced transcript 3	-0.0660576	-3.05016	0.0144769	0.0528687
23959	Nt5e	5' nucleotidase, ecto	-0.329252	-3.04942	0.0144939	0.0529136
67610	Rspry1	ring finger and SPRY domain containing 1	-0.265069	-3.04563	0.0145811	0.0532075
59056	Evc	EvC ciliary complex subunit 1	-0.125356	-3.04534	0.014588	0.0532075
16897	Llgl1	LLGL1 scribble cell polarity complex component	-0.246949	-3.04531	0.0145886	0.0532075
72748	Hdhd3	haloacid dehalogenase-like hydrolase domain containing 3	-0.754159	-3.04351	0.0146302	0.0533421
13869	Erbb4	erb-b2 receptor tyrosine kinase 4	-0.335491	-3.03854	0.0147457	0.0536751
13858	Eps15	epidermal growth factor receptor pathway substrate 15	-0.217736	-3.03836	0.01475	0.0536751
66437	Fis1	fission, mitochondrial 1	-0.359106	-3.03645	0.0147945	0.0538199
218973	Wdhd1	WD repeat and HMG-box DNA binding protein 1	-0.180763	-3.03436	0.0148436	0.0539639
11552	Adra2b	adrenergic receptor, alpha 2b	-0.0733324	-3.03338	0.0148668	0.0540307
103080	2019-09-10	septin 10	-0.538549	-3.02914	0.0149669	0.0543595
67044	Higd2a	HIG1 domain family, member 2A	-0.279959	-3.02847	0.0149827	0.0543995
21687	Tek	TEK receptor tyrosine kinase	-0.421722	-3.02747	0.0150065	0.0544683
54125	Polm	polymerase (DNA directed), mu	-0.173614	-3.0268	0.0150225	0.054509
12833	Col6a1	collagen, type VI, alpha 1	-0.568653	-3.02237	0.0151283	0.0548362
52120	Hgsnat	heparan-alpha-glucosaminide N-acetyltransferase	-0.424761	-3.02221	0.0151321	0.0548362
114664	Hsd17b11	hydroxysteroid (17-beta) dehydrogenase 11	-0.27081	-3.02136	0.0151525	0.0548928
211389	Suox	sulfite oxidase	-0.483931	-3.02036	0.0151765	0.0549619
80905	Polh	polymerase (DNA directed), eta (RAD 30 related)	-0.381343	-3.02008	0.0151833	0.054969
97827	Exd2	exonuclease 3'-5' domain containing 2	-0.498092	-3.01928	0.0152026	0.0550211
80283	Abtb1	ankyrin repeat and BTB (POZ) domain containing 1	-0.423306	-3.01849	0.0152217	0.0550374
67872	Nsmce4a	NSE4 homolog A, SMC5-SMC6 complex component	-0.433163	-3.01555	0.0152927	0.0552765
26422	Nbea	neurobeachin	-0.195041	-3.01534	0.0152978	0.0552774
20811	Srms	src-related kinase lacking C-terminal regulatory tyrosine and N-terminal myristylation sites	-0.373962	-3.01067	0.0154116	0.0556351
60530	Fignl1	fidgetin-like 1	-0.0627713	-3.01024	0.0154221	0.0556554
74080	Nmnat3	nicotinamide nucleotide adenylyltransferase 3	-0.292356	-3.00858	0.0154626	0.0557483
20818	Srprb	signal recognition particle receptor, B subunit	-0.328191	-3.00671	0.0155086	0.0558607
18590	Pdgfa	platelet derived growth factor, alpha	-0.380257	-3.001	0.0156496	0.0562789
12802	Cnr2	cannabinoid receptor 2 (macrophage)	-0.0865616	-2.99987	0.0156779	0.0563625
105853	Mal2	mal, T cell differentiation protein 2	-0.779947	-2.99813	0.0157211	0.0564935
16918	Mycl	v-myc avian myelocytomatosis viral oncogene lung carcinoma derived	-0.266807	-2.998	0.0157243	0.0564935
140559	Igsf8	immunoglobulin superfamily, member 8	-0.427736	-2.99395	0.0158258	0.056804
68743	Anln	anillin, actin binding protein	-0.232588	-2.99196	0.0158758	0.0569654
12183	Bpgm	2,3-bisphosphoglycerate mutase	-0.297409	-2.9915	0.0158873	0.0569717
18676	Phf2	PHD finger protein 2	-0.359589	-2.99149	0.0158876	0.0569717
18795	Plcb1	phospholipase C, beta 1	-0.429235	-2.98935	0.0159418	0.0571478
76524	Cln6	ceroid-lipofuscinosis, neuronal 6	-0.340089	-2.98766	0.0159846	0.0572833
14089	Fap	fibroblast activation protein	-0.361143	-2.98518	0.0160476	0.0574568
246196	Zfp277	zinc finger protein 277	-0.326285	-2.98495	0.0160534	0.0574568
53322	Nucb2	nucleobindin 2	-0.293329	-2.98465	0.016061	0.0574661
14874	Gstz1	glutathione transferase zeta 1 (maleylacetoacetate isomerase)	-0.691198	-2.98437	0.0160683	0.057474
78697	Pus7	pseudouridylate synthase 7	-0.289804	-2.98395	0.0160791	0.0574802
171095	Il17rc	interleukin 17 receptor C	-0.553764	-2.9839	0.0160802	0.0574802
65099	Irak1bp1	interleukin-1 receptor-associated kinase 1 binding protein 1	-0.301909	-2.98334	0.0160944	0.0575049
67184	Ndufa13	NADH:ubiquinone oxidoreductase subunit A13	-0.289986	-2.98323	0.0160973	0.0575049
20509	Slc19a1	solute carrier family 19 (folate transporter), member 1	-0.491989	-2.98167	0.0161372	0.0576291
78330	Ndufv3	NADH:ubiquinone oxidoreductase core subunit V3	-0.454859	-2.98088	0.0161574	0.0576832
192192	Shkbp1	Sh3kbp1 binding protein 1	-0.2388	-2.97975	0.0161865	0.0577666
65963	Tmem176b	transmembrane protein 176B	-0.514677	-2.97704	0.0162563	0.0579264
232910	Ap2s1	adaptor-related protein complex 2, sigma 1 subunit	-0.435616	-2.97612	0.0162802	0.0579753
13430	Dnm2	dynamin 2	-0.361059	-2.97367	0.0163436	0.0581544
11871	Art2a	ADP-ribosyltransferase 2a	-0.156799	-2.97358	0.016346	0.0581544
12581	Cdkn2d	cyclin dependent kinase inhibitor 2D	-0.642937	-2.97287	0.0163645	0.0582022
72512	Tmem173	transmembrane protein 173	-0.210394	-2.97187	0.0163904	0.0582575
217353	Tmc6	transmembrane channel-like gene family 6	-0.220928	-2.97154	0.016399	0.0582698
78523	Mrpl9	mitochondrial ribosomal protein L9	-0.399946	-2.97096	0.0164141	0.0583052
66717	Ccdc96	coiled-coil domain containing 96	-0.124324	-2.96988	0.0164424	0.0583872
67425	Eps8l1	EPS8-like 1	-0.466622	-2.96888	0.0164685	0.058455
66156	Anapc11	anaphase promoting complex subunit 11	-0.247212	-2.96875	0.0164718	0.058455
108686	Ccdc88a	coiled coil domain containing 88A	-0.229757	-2.96714	0.016514	0.0585807
74316	Isca2	iron-sulfur cluster assembly 2	-0.413821	-2.96684	0.0165219	0.0585807
107321	Lpxn	leupaxin	-0.398431	-2.96681	0.0165228	0.0585807
18979	Pon1	paraoxonase 1	-0.695355	-2.96532	0.016562	0.0586969
78560	Adgra2	adhesion G protein-coupled receptor A2	-0.165996	-2.96505	0.0165689	0.0586969
211666	Mgst2	microsomal glutathione S-transferase 2	-0.290529	-2.96451	0.0165832	0.0587213
66054	Cndp2	CNDP dipeptidase 2 (metallopeptidase M20 family)	-0.555165	-2.96232	0.016641	0.058904
19075	Prim1	DNA primase, p49 subunit	-0.249247	-2.96217	0.0166452	0.058904
71177	Ints13	integrator complex subunit 13	-0.275896	-2.96112	0.0166727	0.0589646
16553	Kif13a	kinesin family member 13A	-0.390026	-2.95919	0.016724	0.0591275
67455	Klhl13	kelch-like 13	-0.2014	-2.9584	0.016745	0.0591555
16453	Jak3	Janus kinase 3	-0.366199	-2.95829	0.016748	0.0591555
76263	Gstk1	glutathione S-transferase kappa 1	-0.371912	-2.95811	0.0167529	0.0591555
71973	Rbpms2	RNA binding protein with multiple splicing 2	-0.4816	-2.9576	0.0167665	0.0591852
73847	Fam110a	family with sequence similarity 110, member A	-0.181421	-2.9569	0.0167851	0.0592295
19262	Ptpra	protein tyrosine phosphatase, receptor type, A	-0.35248	-2.95628	0.0168018	0.0592357
68366	Tmem129	transmembrane protein 129	-0.395429	-2.95259	0.0169007	0.0595101
72899	Macrod2	MACRO domain containing 2	-0.122998	-2.95174	0.0169234	0.0595532
14269	Fnbp1	formin binding protein 1	-0.287281	-2.94893	0.0169991	0.0597638
15356	Hmgcl	3-hydroxy-3-methylglutaryl-Coenzyme A lyase	-0.490659	-2.94893	0.0169991	0.0597638
12846	Comt	catechol-O-methyltransferase	-0.631001	-2.94836	0.0170147	0.0597814
[truncated: 1,276 more rows]
