# Supplementary material for: Mitochondrial pyruvate carrier is required for optimal brown fat thermogenesis
Source: eLife journal article supplement (doi:10.7554/elife.52558), 2020-08-14
Supplement: supp [file elife-52558-supp-v1.zip › elife_poa_e52558_Supplementary_file_3.xlsx]

## Sheet: Metabolites
Supplementary file 3. Metabolite analysis in brown adipose tissue at 30°C, 23°C, and 4°C.
Group	D-glucose	Glucose 6-phosphate	3-Phosphoglyceric acid	Phosphoenolpyruvate	Pyruvate	L-Lactic acid	Citric acid	cis-Aconitic acid	Isocitric acid	Succinic acid	Fumaric acid	D-Malic acid	Glycine	L-Alanine	L-Valine	L-Leucine	L-Isoleucine	L-Proline	L-Phenylalanine	L-Tyrosine	L-Tryptophan	L-Serine	L-Threonine	L-Methionine	L-Aspartic acid	L-Glutamic acid	Pyroglutamic acid	Beta-Alanine	Pantothenic acid	2-Aminoadipic acid	Fructose	D-Mannose	Mannitol	Sorbitol	Ribitol	Inositol phosphate	D-Threitol	Gluconic acid	Capric acid	Lauric acid	Myristic acid	Palmitoleic acid	Palmitic acid	Linoleic acid	Oleic acid	Elaidic acid	Stearic acid	Arachidonic acid	Malonic acid
30°C BAT	309052	2496	3402.4	1267.6	48287.8	1140974	38588.4	2282	34694.6	202975	1074637	41932.8	411897	1.61094e+06	272091	67978.6	91104.8	201257	32234	290523	152829	223030	36608	5568.8	527171	259501	1.22534e+06	41958.6	99833.8	26789.6	16145.4	44577.2	18946.2	23478.4	12674.2	67579.4	114269	40187.8	126215	324352	1.14702e+06	599674	2.25125e+06	526912	777053	301918	1.9451e+06	9620.4	1131
23°C BAT	264025	33956	6982.6	1814	53060.4	1.69252e+06	40329.6	2329.8	36002.2	455555	1458995	109200	540382	2.51024e+06	328890	76535.8	116821	166292	39141	300091	188332	329247	67813.2	9789.4	870392	293438	1.78256e+06	51062.6	64496.8	27259.4	13902.2	53780.6	27355.6	40044	28303.6	82884.8	133629	39082.2	133351	338413	1.14977e+06	528909	2.70978e+06	656233	1.03469e+06	337478	2.34343e+06	12230	1296.2
4°C BAT	535710	6702	3957	2237	60584	1.35245e+06	40709.8	2972	32754.6	579298	1.36372e+06	125953	413909	2.24536e+06	737032	169718	250199	216361	80700.2	368233	236148	470024	114953	5732.4	900283	571997	1.62679e+06	60332.8	12375.8	96833.8	16816.4	94329.6	21306.8	65408.6	10648.4	64057.2	133654	33923.4	143480	370402	1.12766e+06	560328	2.63006e+06	613659	974562	321014	2.23358e+06	10684	1246.2
sem 30°C	32650.1	741.293	203.889	335.308	4951.6	145861	8022.96	121.444	6091.84	30399.5	94711.8	9075.69	40614.7	182430	41278.5	13433.7	16663	28561.8	8806.27	38721	19322.1	57975.9	9906.02	1339.99	65686.1	38723.4	141350	7672.48	7872.52	7003.97	2482.4	3452.57	1897.29	1617.49	453.752	4714.62	7217.02	3105.18	4961.98	9978.34	98210	63348.9	121010	57640	70395.8	18363.9	99792.6	1233.9	367.371
sem 23°C	25979.3	17855.7	1773.01	429.275	10764.7	217445	6437.59	58.5469	4649.93	71428	147953	20447.8	42772.7	435662	21826.2	5721.18	10198.6	23636.8	7745.78	17852.2	16420	46868.1	8874.07	2781.62	126189	99513.6	99181.6	8257.42	21498.7	6985.94	1683.48	3812.99	1965.23	7278.27	3178.21	4200.77	7930.53	7225.81	2129.96	6293.44	46298.8	72670	142867	62259.3	120542	37256.2	90917.3	1604.58	286.425
sem 4°C	85313.5	3454.8	437.444	604.268	7605.73	142496	7977.73	244.323	5511.03	56747.1	174766	14402.2	35778.9	243676	33384.7	10406	14499.5	46653.6	6495.33	48886.3	24892.3	23488.6	8192.12	3121.31	96968.6	144524	182829	9321.04	4423.84	29218.5	1515.09	21209.6	1647.84	5244.63	1537.62	5843.46	10292.3	5165.75	6776.28	21766.6	49702.5	93782.1	219534	54623.9	117566	62993.6	101260	942.313	154.503
[truncated: 35 more columns]

## Sheet: 1-Way ANOVA
Metabolites	f.value	p.value	(-LOG10(p))	FDR	Tukey's HSD
2-Hydroxybutyric acid	37.128	7.2507e-06	5.1396	0.00060906	30°C-23°C; 4°C-23°C; 4°C-30°C
L-Valine	27.866	3.0929e-05	4.5096	0.00096887	30°C-23°C; 4°C-23°C; 4°C-30°C
3-hydroxybutyric acid	27.238	3.4602e-05	4.4609	0.00096887	30°C-23°C; 4°C-23°C; 4°C-30°C
Ribitol	23.316	7.3506e-05	4.1337	0.0015436	30°C-23°C; 4°C-23°C; 4°C-30°C
Pantothenic acid	21.687	0.00010356	3.9848	0.0017399	30°C-23°C; 4°C-23°C; 4°C-30°C
Sorbitol	16.366	0.00037274	3.4286	0.0046349	30°C-23°C; 4°C-23°C; 4°C-30°C
L-Isoleucine	16.234	0.00038624	3.4131	0.0046349	30°C-23°C; 4°C-23°C; 4°C-30°C
2'3'-Bisphosphoglycerate	15.328	0.00049575	3.3047	0.0052054	30°C-23°C; 4°C-23°C; 4°C-30°C
L-Leucine	13.07	0.00096997	3.0132	0.0090531	30°C-23°C; 4°C-23°C; 4°C-30°C
Succinic acid	12.212	0.0012788	2.8932	0.010335	30°C-23°C; 4°C-23°C; 4°C-30°C
Adenosine	12.04	0.0013534	2.8686	0.010335	30°C-23°C; 4°C-23°C; 4°C-30°C
2-Hydroxyglutaric acid	11.781	0.0014765	2.8308	0.010335	30°C-23°C; 4°C-23°C; 4°C-30°C
L-Threonine	10.329	0.0024612	2.6088	0.015903	30°C-23°C; 4°C-23°C; 4°C-30°C
Uridine	9.0277	0.004051	2.3924	0.024306	30°C-23°C; 4°C-23°C; 4°C-30°C
Heptadecanoic acid	8.6168	0.0047841	2.3202	0.026791	30°C-23°C; 4°C-23°C; 4°C-30°C
D-Malic acid	7.6407	0.0072425	2.1401	0.038023	30°C-23°C; 4°C-23°C; 4°C-30°C
L-Phenylalanine	7.0506	0.0094434	2.0249	0.046661	30°C-23°C; 4°C-23°C; 4°C-30°C
D-glucose	6.9182	0.010039	1.9983	0.046848	30°C-23°C; 4°C-23°C; 4°C-30°C
Adenine	6.3448	0.013183	1.88	0.058283	30°C-23°C; 4°C-23°C; 4°C-30°C
cis-Aconitic acid	5.9746	0.015825	1.8007	0.064524	30°C-23°C; 4°C-23°C; 4°C-30°C
L-Aspartic acid	5.9014	0.016418	1.7847	0.064524	30°C-23°C; 4°C-23°C; 4°C-30°C
Cholesterol	5.8442	0.016899	1.7721	0.064524	30°C-23°C; 4°C-23°C; 4°C-30°C
L-Serine	5.4729	0.020459	1.6891	0.074718	30°C-23°C; 4°C-23°C; 4°C-30°C
Mannitol	4.9871	0.026523	1.5764	0.091829	30°C-23°C; 4°C-23°C; 4°C-30°C
Campesterol	4.9323	0.02733	1.5634	0.091829	30°C-23°C; 4°C-23°C; 4°C-30°C
Threonic acid	4.8183	0.029105	1.536	0.09403	30°C-23°C; 4°C-23°C; 4°C-30°C
Glycerol	4.7147	0.030835	1.511	0.094385	30°C-23°C; 4°C-23°C; 4°C-30°C
Stearic acid	4.6562	0.031863	1.4967	0.094385	30°C-23°C; 4°C-23°C; 4°C-30°C
Cystathionine	4.5959	0.032967	1.4819	0.094385	30°C-23°C; 4°C-23°C; 4°C-30°C
Glucose 6-phosphate	4.5317	0.034191	1.4661	0.094385	30°C-23°C; 4°C-23°C; 4°C-30°C
D-Mannose	4.4991	0.034832	1.458	0.094385	30°C-23°C; 4°C-23°C; 4°C-30°C
2-Aminoadipic acid	4.4345	0.036148	1.4419	0.094889	30°C-23°C; 4°C-23°C; 4°C-30°C
L-Tryptophan	4.1411	0.042895	1.3676	0.10919	30°C-23°C; 4°C-23°C; 4°C-30°C
3-Phosphoglyceric acid	4.0681	0.044794	1.3488	0.11067	30°C-23°C; 4°C-23°C; 4°C-30°C
Pyroglutamic acid	3.925	0.048812	1.3115	0.11715	30°C-23°C; 4°C-23°C; 4°C-30°C
Inositol phosphate	3.7305	0.054966	1.2599	0.12825	30°C-23°C; 4°C-23°C; 4°C-30°C
2-Hydroxybenzoic acid	3.4276	0.066449	1.1775	0.14841	30°C-23°C; 4°C-23°C; 4°C-30°C
Pyrrolidonecarboxylic acid e hit	3.4114	0.067138	1.173	0.14841	30°C-23°C; 4°C-23°C; 4°C-30°C
O-Phosphoethanolamine	3.2419	0.074873	1.1257	0.16127	30°C-23°C; 4°C-23°C; 4°C-30°C
Urea	3.0954	0.082407	1.084	0.17306	30°C-23°C; 4°C-23°C; 4°C-30°C
Glycine	3.0248	0.086354	1.0637	0.17692	30°C-23°C; 4°C-23°C; 4°C-30°C
Capric acid	2.8185	0.099205	1.0035	0.19841	30°C-23°C; 4°C-23°C; 4°C-30°C
Glycerol 3-phosphate	2.6877	0.10851	0.96452	0.21198	30°C-23°C; 4°C-23°C; 4°C-30°C
L-Lactic acid	2.6496	0.11141	0.95307	0.21269	30°C-23°C; 4°C-23°C; 4°C-30°C
Lauric acid	2.6062	0.11482	0.93996	0.21434	30°C-23°C; 4°C-23°C; 4°C-30°C
Palmitic acid	2.2498	0.14799	0.82976	0.27024	30°C-23°C; 4°C-23°C; 4°C-30°C
L-Alanine	2.2148	0.15182	0.81866	0.27134	30°C-23°C; 4°C-23°C; 4°C-30°C
L-Glutamic acid	2.1699	0.1569	0.80438	0.27457	30°C-23°C; 4°C-23°C; 4°C-30°C
Glyoxylic acid	2.0788	0.16782	0.77517	0.28587	30°C-23°C; 4°C-23°C; 4°C-30°C
Fumaric acid	2.0601	0.17016	0.76914	0.28587	30°C-23°C; 4°C-23°C; 4°C-30°C
L-Methionine	1.7219	0.22008	0.65742	0.36052	30°C-23°C; 4°C-23°C; 4°C-30°C
Thymine	1.6563	0.23163	0.63521	0.36052	30°C-23°C; 4°C-23°C; 4°C-30°C
Oleic acid	1.637	0.23516	0.62864	0.36052	30°C-23°C; 4°C-23°C; 4°C-30°C
D-Threitol	1.6331	0.23588	0.62731	0.36052	30°C-23°C; 4°C-23°C; 4°C-30°C
Hypotaurine	1.6322	0.23605	0.62699	0.36052	30°C-23°C; 4°C-23°C; 4°C-30°C
Uric acid	1.5964	0.2428	0.61475	0.3642	30°C-23°C; 4°C-23°C; 4°C-30°C
Inosine	1.5484	0.25221	0.59823	0.37168	30°C-23°C; 4°C-23°C; 4°C-30°C
Linoleic acid	1.4763	0.26716	0.57322	0.38693	30°C-23°C; 4°C-23°C; 4°C-30°C
Beta-Alanine	1.0911	0.36697	0.43537	0.5163	30°C-23°C; 4°C-23°C; 4°C-30°C
L-Tyrosine	1.061	0.37646	0.42429	0.5163	30°C-23°C; 4°C-23°C; 4°C-30°C
Arachidonic acid	1.0491	0.38027	0.41991	0.5163	30°C-23°C; 4°C-23°C; 4°C-30°C
Pyrophosphate	1.0339	0.38523	0.41428	0.5163	30°C-23°C; 4°C-23°C; 4°C-30°C
Uracil	1.0279	0.38722	0.41204	0.5163	30°C-23°C; 4°C-23°C; 4°C-30°C
Phosphoenolpyruvate	0.93077	0.42094	0.37578	0.55193	30°C-23°C; 4°C-23°C; 4°C-30°C
Hypoxanthine	0.90031	0.43221	0.36431	0.55193	30°C-23°C; 4°C-23°C; 4°C-30°C
2-Monopalmitoylglycerol	0.89647	0.43366	0.36285	0.55193	30°C-23°C; 4°C-23°C; 4°C-30°C
N-acetyl-L-aspartic acid	0.75245	0.4922	0.30786	0.61418	30°C-23°C; 4°C-23°C; 4°C-30°C
serotonin	0.74109	0.49719	0.30347	0.61418	30°C-23°C; 4°C-23°C; 4°C-30°C
Fructose	0.7226	0.50546	0.29632	0.61534	30°C-23°C; 4°C-23°C; 4°C-30°C
Adipic acid	0.53537	0.59881	0.22271	0.71857	30°C-23°C; 4°C-23°C; 4°C-30°C
Gluconic acid	0.51037	0.61274	0.21273	0.72493	30°C-23°C; 4°C-23°C; 4°C-30°C
Pyruvate	0.46212	0.6407	0.19334	0.74748	30°C-23°C; 4°C-23°C; 4°C-30°C
L-Proline	0.39701	0.68084	0.16695	0.78343	30°C-23°C; 4°C-23°C; 4°C-30°C
Malonic acid	0.31512	0.73556	0.13338	0.83496	30°C-23°C; 4°C-23°C; 4°C-30°C
Benzoic acid	0.2759	0.76357	0.11715	0.85482	30°C-23°C; 4°C-23°C; 4°C-30°C
Palmitoleic acid	0.26254	0.7734	0.11159	0.85482	30°C-23°C; 4°C-23°C; 4°C-30°C
Zymosterol	0.18403	0.83421	0.078724	0.90855	30°C-23°C; 4°C-23°C; 4°C-30°C
Elaidic acid	0.17245	0.84365	0.073837	0.90855	30°C-23°C; 4°C-23°C; 4°C-30°C
Beta-lactate	0.15748	0.85603	0.067512	0.91021	30°C-23°C; 4°C-23°C; 4°C-30°C
Isocitric acid	0.10916	0.89747	0.046982	0.94182	30°C-23°C; 4°C-23°C; 4°C-30°C
1-Steroylglycerol	0.097084	0.90819	0.041825	0.94182	30°C-23°C; 4°C-23°C; 4°C-30°C
1-Palmitoylglycerol	0.068405	0.93424	0.02954	0.95703	30°C-23°C; 4°C-23°C; 4°C-30°C
Citric acid	0.054245	0.94743	0.023453	0.95885	30°C-23°C; 4°C-23°C; 4°C-30°C
Myristic acid	0.031967	0.96862	0.013846	0.96862	30°C-23°C; 4°C-23°C; 4°C-30°C
