# Supplementary material for: Mitochondrial pyruvate carrier is required for optimal brown fat thermogenesis
Source: eLife journal article supplement (doi:10.7554/elife.52558), 2020-08-14
Supplement: supp [file elife-52558-supp-v1.zip › elife_poa_e52558_Supplementary_file_4.xlsx]

## Sheet: Metabolites
Supplementary file 4. Metabolite analysis of serum at 30°C, 23°C, and 4°C.
Condition	D glucose	L Lactic acid	Citric acid	Isocitric acid	Succinic acid	Fumaric acid	D Malic acid	Sedoheptulose 7 phosphate	Glycine	L Alanine	L Valine	L Leucine	L Isoleucine	L Proline	L Phenylalanine	L Tyrosine	L Tryptophan	L Serine	L Threonine	L Methionine	L Aspartic acid	L Glutamic acid	L Lysine	Pyroglutamic acid	Ornithine	Beta Alanine	2 Aminoadipic acid	4 Hydroxyproline	D Mannose	Mannitol	Sorbitol	Ribitol	myo Inositol	Inositol phosphate	D Threitol	Gluconic acid	Nonanoic acid	Capric acid	Lauric acid	Myristic acid	Palmitoleic acid	Palmitic acid	Linoleic acid	Oleic acid	Elaidic acid	Stearic acid	Arachidonic acid	Heptadecanoic acid	2 Monopalmitoylglycerol
30°C	433541	160746	11311.4	4103.19	7444.95	6284.47	786.847	349.917	19273.3	159614	108981	80151.7	39516.6	20262.3	18329.2	14472.3	151074	48403.4	5524.29	8692.06	8751.47	4905.92	22941.6	812515	47513.4	486.635	1339.62	23807.6	120399	4215.51	4177.63	1871.56	70540.9	10072.4	4217.05	1708.23	32622.8	1783.71	4200.36	104421	13739.1	223969	57709.6	59192.6	5147.77	134601	410.431	2020.75	1350.96
23°C	803259	233142	8866.79	3348.04	30113.8	6109.66	885.523	183.488	16618.8	143517	100147	87654.6	42642.8	17550.2	20424.4	13504.2	172189	34407.1	5914.75	9502.88	7507.82	3422.6	17929.2	774503	35233.7	509.183	1511.98	16395.6	143995	3086.45	4578.82	2232.72	75020.8	10568.6	4535.88	2922.77	29912.4	1671.27	4208.98	134286	21096.7	325999	160949	104373	7007.82	171388	1247.91	2523.84	1636.72
4°C	228959	127240	10054.8	3574.82	18134.9	8184.51	983.409	573.497	10522.1	106545	190359	155486	60097.5	11829.7	23103.8	9965.84	96306.9	28432.4	4133.99	4531.41	5726.17	5214.92	18472	533962	36589	1004.76	8667.08	8444.39	113148	3173.51	3404.63	979.502	67974.6	6855.66	3020.75	3033.15	29363.2	2200.41	6209.8	106328	26197.4	283190	63502.3	121193	10813.9	127015	38.7777	2377.87	1268.67
sem 30C	127609	17444.6	716.134	270.891	1585.72	161.938	159.325	213.351	1886.51	30474	12639.7	9617.04	10531.9	3114.43	4854.89	1841.14	25709.7	6355.93	1064.78	1419.05	1951.69	842.42	3979.55	116092	10598.6	97.4039	143.388	1774.22	10598.2	581.629	527.525	251.114	4805.98	2184.45	268.355	226.75	2624.08	92.4507	147.354	7068.22	3085.17	16680.4	25436.7	17848.8	1451.38	5423.8	338.81	107.07	77.4277
sem 23C	173872	42560.3	1186.59	214.735	8485.51	829.491	124.553	89.4486	936.677	13577.9	4602.64	4210.23	5628.84	732.913	1539.79	818.874	38898.6	8810.67	398.97	547.767	779.314	566.527	2965.92	69346.5	5987.45	83.3804	411.923	3055.83	11612.6	1390.09	485.658	245.368	6009.51	2197.01	433.416	480.088	1850.94	137.092	94.3033	12216.9	4392.82	47902.9	49884.6	23563.5	1070.43	23552.6	346.711	183.102	137.893
sem 4C	41731.6	26611.6	2222.12	966.999	5517.35	2721.66	348.199	254.506	869.484	4442.85	8188.71	4867.78	4266.18	738.216	1355.67	1121.28	31158.2	1027.23	320.758	708.458	395.509	952.912	793.901	17014.4	4425.22	167.537	1791.56	2233.66	7934.7	633.936	639.991	255.121	2725.08	1147.18	301.223	229.347	1008.8	78.4245	417.769	4909.53	4198.26	31878.9	8763.9	14659	1033.4	3338.89	16.4911	113.969	72.46
[truncated: 37 more columns]

## Sheet: 1-Way ANOVA
Metabolites	f.value	p.value	(-LOG10(p))	FDR	Tukey's HSD
2 Hydroxybutyric acid	44.511	2.81e-06	5.5514	0.0002416	30°C-23°C; 4°C-23°C; 4°C-30°C
L Proline	33.647	1.2e-05	4.9203	0.00048822	30°C-23°C; 4°C-23°C; 4°C-30°C
L Leucine	30.687	1.91e-05	4.7182	0.00048822	30°C-23°C; 4°C-23°C; 4°C-30°C
Glycine	29.655	2.27e-05	4.6438	0.00048822	30°C-23°C; 4°C-23°C; 4°C-30°C
2 Aminoadipic acid	23.726	6.76e-05	4.1699	0.0011632	30°C-23°C; 4°C-23°C; 4°C-30°C
3 hydroxybutyric acid	18.106	0.00023779	3.6238	0.0034083	30°C-23°C; 4°C-23°C; 4°C-30°C
Pyroglutamic acid	14.774	0.00058054	3.2362	0.00688	30°C-23°C; 4°C-23°C; 4°C-30°C
L Valine	14.439	0.00064	3.1938	0.00688	30°C-23°C; 4°C-23°C; 4°C-30°C
L Methionine	12.066	0.0013419	2.8723	0.012823	30°C-23°C; 4°C-23°C; 4°C-30°C
4 Hydroxyproline	11.463	0.0016452	2.7838	0.014149	30°C-23°C; 4°C-23°C; 4°C-30°C
L Tyrosine	10.862	0.00203	2.6925	0.015871	30°C-23°C; 4°C-23°C; 4°C-30°C
Glycerol	10.063	0.0027165	2.566	0.019468	30°C-23°C; 4°C-23°C; 4°C-30°C
Arachidonic acid	9.4879	0.0033802	2.4711	0.022361	30°C-23°C; 4°C-23°C; 4°C-30°C
D Threitol	9.2862	0.0036569	2.4369	0.022464	30°C-23°C; 4°C-23°C; 4°C-30°C
2 Hydroxyglutaric acid	8.4663	0.0050906	2.2932	0.029186	30°C-23°C; 4°C-23°C; 4°C-30°C
Elaidic acid	7.926	0.0063965	2.1941	0.031495	30°C-23°C; 4°C-23°C; 4°C-30°C
Ethanolamine	7.923	0.0064049	2.1935	0.031495	30°C-23°C; 4°C-23°C; 4°C-30°C
L Alanine	7.8563	0.006592	2.181	0.031495	30°C-23°C; 4°C-23°C; 4°C-30°C
Uracil	7.1796	0.0089022	2.0505	0.039558	30°C-23°C; 4°C-23°C; 4°C-30°C
Lauric acid	7.1076	0.0091995	2.0362	0.039558	30°C-23°C; 4°C-23°C; 4°C-30°C
L Aspartic acid	6.2375	0.013891	1.8573	0.056888	30°C-23°C; 4°C-23°C; 4°C-30°C
Succinic acid	6.0787	0.015024	1.8232	0.058731	30°C-23°C; 4°C-23°C; 4°C-30°C
Phosphate	5.5068	0.020099	1.6968	0.075152	30°C-23°C; 4°C-23°C; 4°C-30°C
Isocitric acid	5.0259	0.025968	1.5856	0.093051	30°C-23°C; 4°C-23°C; 4°C-30°C
2 Monopalmitoylglycerol	4.8053	0.029315	1.5329	0.10082	30°C-23°C; 4°C-23°C; 4°C-30°C
L Threonine	4.6516	0.031947	1.4956	0.10082	30°C-23°C; 4°C-23°C; 4°C-30°C
Pyrrolidonecarboxylic acid e hit	4.6314	0.032312	1.4906	0.10082	30°C-23°C; 4°C-23°C; 4°C-30°C
Beta Alanine	4.54	0.03403	1.4681	0.10082	30°C-23°C; 4°C-23°C; 4°C-30°C
Beta Sitosterol	4.5351	0.034126	1.4669	0.10082	30°C-23°C; 4°C-23°C; 4°C-30°C
D glucose	4.4823	0.035169	1.4538	0.10082	30°C-23°C; 4°C-23°C; 4°C-30°C
Campesterol	4.4058	0.036749	1.4347	0.10149	30°C-23°C; 4°C-23°C; 4°C-30°C
1 Steroylglycerol	4.3586	0.037765	1.4229	0.10149	30°C-23°C; 4°C-23°C; 4°C-30°C
Oleic acid	4.1583	0.042461	1.372	0.11065	30°C-23°C; 4°C-23°C; 4°C-30°C
O Phosphoethanolamine	4.0122	0.046317	1.3343	0.11715	30°C-23°C; 4°C-23°C; 4°C-30°C
Xanthine	3.9149	0.049112	1.3088	0.11736	30°C-23°C; 4°C-23°C; 4°C-30°C
Citric acid	3.8815	0.050116	1.3	0.11736	30°C-23°C; 4°C-23°C; 4°C-30°C
Glycerol 3 phosphate	3.8692	0.050491	1.2968	0.11736	30°C-23°C; 4°C-23°C; 4°C-30°C
Palmitoleic acid	3.3303	0.07072	1.1505	0.16005	30°C-23°C; 4°C-23°C; 4°C-30°C
L Tryptophan	3.2275	0.07558	1.1216	0.16666	30°C-23°C; 4°C-23°C; 4°C-30°C
Uridine	3.1342	0.080331	1.0951	0.17214	30°C-23°C; 4°C-23°C; 4°C-30°C
L Isoleucine	3.1017	0.082068	1.0858	0.17214	30°C-23°C; 4°C-23°C; 4°C-30°C
Cholesterol	3.0428	0.085326	1.0689	0.17472	30°C-23°C; 4°C-23°C; 4°C-30°C
Ribitol	2.9594	0.090208	1.0448	0.18042	30°C-23°C; 4°C-23°C; 4°C-30°C
Ornithine	2.9119	0.093128	1.0309	0.18202	30°C-23°C; 4°C-23°C; 4°C-30°C
L Lactic acid	2.8726	0.095634	1.0194	0.18277	30°C-23°C; 4°C-23°C; 4°C-30°C
L Glutamic acid	2.7637	0.10299	0.98722	0.18729	30°C-23°C; 4°C-23°C; 4°C-30°C
Linoleic acid	2.7377	0.10484	0.97948	0.18729	30°C-23°C; 4°C-23°C; 4°C-30°C
Capric acid	2.697	0.10782	0.96731	0.18729	30°C-23°C; 4°C-23°C; 4°C-30°C
myo Inositol	2.684	0.10879	0.96341	0.18729	30°C-23°C; 4°C-23°C; 4°C-30°C
Hypoxanthine	2.6827	0.10889	0.96301	0.18729	30°C-23°C; 4°C-23°C; 4°C-30°C
Nonanoic acid	2.5342	0.12076	0.91808	0.20363	30°C-23°C; 4°C-23°C; 4°C-30°C
Cystathionine	2.4544	0.12776	0.8936	0.21014	30°C-23°C; 4°C-23°C; 4°C-30°C
Inositol phosphate	2.4354	0.1295	0.88772	0.21014	30°C-23°C; 4°C-23°C; 4°C-30°C
1 Palmitoylglycerol	2.3927	0.13351	0.8745	0.21262	30°C-23°C; 4°C-23°C; 4°C-30°C
Inosine	2.3209	0.14057	0.85212	0.21754	30°C-23°C; 4°C-23°C; 4°C-30°C
Benzoic acid	2.3102	0.14166	0.84877	0.21754	30°C-23°C; 4°C-23°C; 4°C-30°C
Nicotinamide	2.2133	0.15198	0.81821	0.2293	30°C-23°C; 4°C-23°C; 4°C-30°C
Sorbitol	2.1543	0.1587	0.79942	0.23531	30°C-23°C; 4°C-23°C; 4°C-30°C
2 3 Bisphosphoglycerate	2.1201	0.16276	0.78845	0.23725	30°C-23°C; 4°C-23°C; 4°C-30°C
Pyrophosphate	2.0775	0.16798	0.77474	0.24077	30°C-23°C; 4°C-23°C; 4°C-30°C
Mannitol	2.0241	0.17479	0.75747	0.24602	30°C-23°C; 4°C-23°C; 4°C-30°C
Gluconic acid	2.0046	0.17736	0.75114	0.24602	30°C-23°C; 4°C-23°C; 4°C-30°C
Glycolic acid	1.9418	0.18595	0.7306	0.25197	30°C-23°C; 4°C-23°C; 4°C-30°C
L Lysine	1.9307	0.18751	0.72697	0.25197	30°C-23°C; 4°C-23°C; 4°C-30°C
Oxalic acid	1.8729	0.19593	0.7079	0.25923	30°C-23°C; 4°C-23°C; 4°C-30°C
Adenosine 5 monophosphate	1.7348	0.21787	0.66179	0.2839	30°C-23°C; 4°C-23°C; 4°C-30°C
Adenosine 3 monophosphate	1.5841	0.24518	0.61052	0.3147	30°C-23°C; 4°C-23°C; 4°C-30°C
Uric acid	1.4723	0.26803	0.57181	0.33898	30°C-23°C; 4°C-23°C; 4°C-30°C
Hypotaurine	1.4461	0.27375	0.56265	0.34119	30°C-23°C; 4°C-23°C; 4°C-30°C
Stearic acid	1.1877	0.33836	0.47062	0.4157	30°C-23°C; 4°C-23°C; 4°C-30°C
D Mannose	1.1125	0.36039	0.44323	0.43653	30°C-23°C; 4°C-23°C; 4°C-30°C
L Serine	1.0509	0.37971	0.42055	0.45354	30°C-23°C; 4°C-23°C; 4°C-30°C
Sedoheptulose 7 phosphate	0.9862	0.40129	0.39654	0.47275	30°C-23°C; 4°C-23°C; 4°C-30°C
Myristic acid	0.92093	0.42454	0.37208	0.49339	30°C-23°C; 4°C-23°C; 4°C-30°C
L Phenylalanine	0.9036	0.43098	0.36555	0.49419	30°C-23°C; 4°C-23°C; 4°C-30°C
Fumaric acid	0.62047	0.55408	0.25643	0.62699	30°C-23°C; 4°C-23°C; 4°C-30°C
serotonin	0.59263	0.56827	0.24545	0.63469	30°C-23°C; 4°C-23°C; 4°C-30°C
Urea	0.53463	0.59921	0.22242	0.66067	30°C-23°C; 4°C-23°C; 4°C-30°C
Taurine	0.45593	0.6444	0.19084	0.7015	30°C-23°C; 4°C-23°C; 4°C-30°C
Threonic acid	0.3581	0.70623	0.15106	0.75919	30°C-23°C; 4°C-23°C; 4°C-30°C
Palmitic acid	0.30617	0.74185	0.12969	0.78764	30°C-23°C; 4°C-23°C; 4°C-30°C
Adenosine	0.17859	0.83863	0.076428	0.87954	30°C-23°C; 4°C-23°C; 4°C-30°C
Creatinine	0.15613	0.85716	0.066939	0.88814	30°C-23°C; 4°C-23°C; 4°C-30°C
Thymine	0.033413	0.96723	0.014471	0.97457	30°C-23°C; 4°C-23°C; 4°C-30°C
Heptadecanoic acid	0.032339	0.96826	0.014007	0.97457	30°C-23°C; 4°C-23°C; 4°C-30°C
D Malic acid	0.02581	0.97457	0.011185	0.97457	30°C-23°C; 4°C-23°C; 4°C-30°C
