# Supplementary material for: Mitochondrial pyruvate carrier is required for optimal brown fat thermogenesis
Source: eLife journal article supplement (doi:10.7554/elife.52558), 2020-08-14
Supplement: supp [file elife-52558-supp-v1.zip › elife_poa_e52558_Supplementary_file_5.xlsx]

## Sheet: Sheet1
Supplementary file 5. List of metabolites from serum of MPC1 F/F and MPC1 F/F::UCP1-Cre mice housed at 4°C for 6 hours.
Group	D-glucose	Pyruvate	Citric acid	Isocitric acid	2-Ketoglutarate	Succinic acid	Fumaric acid	D-Malic acid	Glycine	L-Alanine	L-Valine	L-Leucine	L-Isoleucine	L-Proline	L-Phenylalanine	L-Tyrosine	L-Serine	L-Threonine	L-Methionine	L-Asparagine	L-Glutamine	L-Aspartic acid	L-Glutamic acid	L-Lysine	Pyroglutamic acid	Ornithine	Beta-Alanine	2-Aminoadipic acid	4-Hydroxyproline	D-Fructose	D-Mannose	Sorbitol	Ribitol	myo-Inositol	Inositol phosphate	D-Threitol	Gluconic acid	Nonanoic acid	Capric acid	Lauric acid	Myristic acid	Palmitoleic acid	Palmitic acid	Linoleic acid	Oleic acid	Elaidic acid	Stearic acid	Arachidonic acid	Malonic acid
MPC1 F/F	1.9558e+06	22395.7	84842.8	34695.5	42535	56543.9	54266.3	7329.94	71488	716806	216534	168985	671706	150211	420175	280430	278252	375319	40215.9	5378.94	6640.76	15997.8	23030.5	493865	343244	605562	4879.77	153738	25198.6	74471.3	403269	25052.7	7637.87	512581	35062.9	20714.2	30605.3	129670	11047.8	28113.6	630133	231718	189693	591211	772345	58358.1	704419	957.247	981.767
MPC1 F/F UCP1Cre	1.13506e+06	21083.2	89609.6	36675.4	37164.1	86614.2	60788.1	8131.41	71884.2	581914	314338	253497	861389	141000	495405	374925	171581	450178	38572.6	6442.63	5575.26	19658.2	23718.4	683506	347746	740985	4313.34	200775	27630.2	33314.2	342569	20796.6	36400.9	574704	37040.7	19929.8	36064.1	144975	12603.2	33307.7	648546	277938	204800	699176	984558	71822.8	663198	1175.77	1008.54
se MPC1 Ctrl	373508	5666.38	11853.3	4642.27	6569.66	19083.7	2522.09	316.414	13352.5	132620	63253.3	61653	189253	32257.8	95044	119524	112501	130890	8115.25	1782.86	1450.81	2631.54	4216.51	228329	49888	206285	1519.53	41634.2	3166.82	19498.3	37163.8	2203.64	440.515	65111.7	3406.76	1051.58	7355.27	6090.33	811.59	2983.48	26732.4	35090.9	18204.1	96045.6	108563	6003.35	28960.1	86.4347	149.214
se MPC1 KO	237162	6098.89	3131.47	1528.05	6537.42	30358.1	4154.7	1067.4	5828.55	88420.9	46661.2	42271.3	98293.7	13239.1	40589.3	82140.3	59423.5	75908.4	3634.71	658.07	1397.22	3648.86	1827.87	149765	20192.4	103969	508.494	25094.8	1585.26	4964.6	27247.3	2605.36	30315.1	30568.7	3073.91	1264.74	3662.21	6103.99	610.193	1511.17	35305	15062.3	5971.53	43968.7	48182.8	3540.22	21777	170.252	44.3756
ttest	0.0932725	0.877859	0.705569	0.693939	0.57507	0.421291	0.209318	0.488076	0.978838	0.417185	0.241762	0.28463	0.39465	0.797025	0.48335	0.529368	0.421392	0.631471	0.857083	0.587996	0.608351	0.43479	0.883991	0.50319	0.934987	0.570712	0.731055	0.356065	0.507937	0.0680143	0.217149	0.240717	0.365135	0.408012	0.675601	0.643695	0.521483	0.10628	0.156565	0.151454	0.686343	0.253965	0.44868	0.330827	0.104289	0.0821674	0.281794	0.279075	0.866869
[truncated: 40 more columns]
