# Supplementary material for: Mitochondrial pyruvate carrier is required for optimal brown fat thermogenesis
Source: eLife journal article supplement (doi:10.7554/elife.52558), 2020-08-14
Supplement: supp [file elife-52558-supp-v1.zip › elife_poa_e52558_Supplementary_file_6.xlsx]

## Sheet: Fold Change
Supplementary file 6. List of metabolites from BAT of MPC1 F/F and MPC1 F/F UCP1 Cre mice housed at 4°C for 6 hours.
Group	D-glucose	Glucose 6-phosphate	DHAP	Pyruvate	L-Lactic acid	Citric acid	cis-Aconitic acid	Isocitric acid	Succinic acid	Fumaric acid	D-Malic acid	Sedoheptulose 7-phosphate	Glycine	L-Alanine	L-Valine	L-Leucine	L-Isoleucine	L-Phenylalanine	L-Tyrosine	L-Serine	L-Threonine	L-Methionine	L-Aspartic acid	L-Glutamic acid	Pyroglutamic acid	Beta-Alanine	Pantothenic acid	D-Fructose	D-Mannose	Mannitol	Sorbitol	myo-Inositol	Inositol phosphate	D-Threitol	Gluconic acid	Nonanoic acid	Capric acid	Lauric acid	Myristic acid	Palmitoleic acid	Palmitic acid	Linoleic acid	Oleic acid	Elaidic acid	Stearic acid	Arachidonic acid	Malonic acid	Heptadecanoic acid	2-Monopalmitoylglycerol
MPC1 F/F	554090	11619.2	1239.37	11539	391315	10370.1	836.336	9476.7	757599	273553	27842.7	13876.3	88236.2	1.57754e+06	222446	173778	81192.1	69911.4	290952	143635	197393	12364	148438	302430	603557	5110.11	6400.51	5313.39	23745.9	5113.33	14263.4	3.13766e+06	195848	7989.15	11962.3	175640	15868.6	33762.8	789983	79064	504113	554053	805127	59708.7	1.65896e+06	3449.58	601.071	20380.9	7881.96
MPC1 F/F UCP1Cre	405003	5824.18	683.227	13387.7	202338	5673.1	940.47	5467.15	234635	110434	7464.63	12899	75573.5	678060	300792	218212	80357.6	70460	334515	104898	164235	11202.7	97672.4	205075	218047	4344.76	3342.04	3320.08	21322.5	4908.34	9182.26	3.44978e+06	170635	6784.08	8765.73	181834	16816.7	37393.1	785855	93364.9	489982	715777	995005	64173.5	1.76135e+06	4072.23	1367.26	22679.7	10599.7
se MPC1 Ctrl	89240	3639.3	279.448	1839.68	112956	1460.61	39.5201	1116.2	47293.6	39765.7	3695.22	2196.56	9906.98	267428	47574.5	47145.3	14459	16972.5	76430.4	30938.9	48856.2	2445.73	31018.3	51049.5	115524	746.971	576.261	500.347	3281.7	397.727	2498.3	260291	22394.1	585.654	2026.58	12110.4	1752.06	3377.49	61432.4	14042.5	52676.7	93490.6	145951	8172.51	133734	360.685	74.5306	1666.36	938.512
se MPC1 KO	47664.5	630.592	185.112	1663.99	17874.3	804.971	49.8862	879.009	15511.2	9028.02	605.528	1634.25	8125.09	168406	74146	54364.7	15584.7	13587.2	71669.8	20635.5	37762	2397.06	18325.5	34444.9	34926.1	541.648	502.679	286.874	1820.64	567.284	1512.39	391478	19902	701.865	1863.97	23710.2	1762.84	3603.41	60844.8	12621.6	37809	79238	132509	11006.8	162031	679.753	235.046	1630.18	1453.66
ttest	0.171356	0.147725	0.128076	0.47326	0.129448	0.0182744	0.132838	0.0180947	1.00827e-06	0.00251747	0.000283991	0.728527	0.346318	0.0173646	0.394719	0.550718	0.96946	0.980365	0.686357	0.322123	0.60302	0.74154	0.189134	0.144988	0.00958445	0.42619	0.00252005	0.00616296	0.53299	0.773384	0.11251	0.521756	0.419709	0.216803	0.272625	0.820705	0.710824	0.479188	0.962853	0.466273	0.831864	0.216371	0.358154	0.75138	0.636492	0.437263	0.0111121	0.347323	0.147327
[truncated: 32 more columns]
