# Supplementary material for: Mitochondrial pyruvate carrier is required for optimal brown fat thermogenesis
Source: eLife journal article supplement (doi:10.7554/elife.52558), 2020-08-14
Supplement: supp [file elife-52558-supp-v1.zip › elife_poa_e52558_Supplementary_file_7.xlsx]

## Sheet: Sheet1
Supplementary file 7. Real-time PCR primer list.
Gene	Forward primer	Reverse primer
MPC1	GAGGACGACTTATCAACTACGAGAT	GCACGACTACTCATGCTGACA
MPC2	CCGCTTTACAACCACCCGGCA	CAGCACACACCAATCCCCATTTCA
CIDEA	ATCACAACTGGCCTGGTTACG	TACTACCCGGTGTCCATTTCT
DIO2	AATTATGCCTCGGAGAAGACCG	GGCAGTTGCCTAGTGAAAGGT
UCP1	CGTACCAAGCTGTGCGATGT	CAGTCGCAGAAAAGAAGCCAC
ELOVL3	TCCGCGTTCTCATGTAGGTCT	GGACCTGATGCAACCCTATGA
PGC1α	CCCTGCCATTGTTAAGACC	TGCTGCTGTTCCTGTTTTC
PPARγ	AACTCTGGGAGATTCTCCTGTTGA	TGGTAATTTCTTGTGAAGTGCTCATA
PRDM16	CAGCACGGTGAAGCCATTC	GCGTGCATCCGCTTGTG
CD36	ATGGGCTGTGATCGGAACTG	GTCTTCCCAATAAGCATGTCTCC
LPL	TGTGTCTTCAGGGGTCCTTAG	TTTGGCTCCAGAGTTTGACC
ATGL	TAATGTTGGCACCTGCTTCA	CCACTCACATCTACGGAGCC
CPT1a	TTGGAAGTCTCCCTCCTTCA	GCCCATGTTGTACAGCTTCC
CPT1b	GCTGCTTGCACATTTGTGTT	TGAGTGACTGGTGGGAAGAA
CPT2	TCTTCCTGAACTGGCTGTCA	GTACCCACCATGCACTACCA
AGPAT2	CAGCCAGGTTCTACGCCAAG	TGATGCTCATGTTATCCACGGT
DGAT2	GAAGATGTCTTGGAGGGCTG	CGCAGCGAAAACAAGAATAA
FASN	GGAGGTGGTGATAGCCGGTAT	TGGGTAATCCATAGAGCCCAG
ACC1	TGTACAAGCAGTGTGGGCTGGCT	CCACATGGCCTGGCTTGGAGGG
ACLY	CAGCCAAGGCAATTTCAGAGC	CTCGACGTTTGATTAACTGGTCT
OCTN2	AAGACCTGCAGGAAGCTGAA	TCCTTGTTTTTCGTGGGTGT
ACAD	CAACCTTCATCGCCATTTCT	GCCCAGAGAGCTCTAGACGA
HMGCL	GTGAAGATGGCGTCAGTGAG	AGTGCCCATGGAGGAGGT
HMGCS2	GAAGAGAGCGATGCAGGAAAC	GTCCACATATTGGGCTGGAAA
BDH1	CGTGGCACCAAGTTGTAAGA	GCATCTGGCTGGTCACTGT
OXCT1	CATAAGGGGTGTGTCTGCTACT	GCAAGGTTGCACCATTAGGAAT
ACSS2	TTCCCTGGCTACTATGTGACC	CCTGCCCGTGATCCAGTA
SLC25A1	TCCGCGTTCTCATGTAGGTCT	GGACCTGATGCAACCCTATGA
ACACA	GGAGATGTACGCTGACCGAGAA	ACCCGACGCATGGTTTTCA
MCT1	TGTTGTTGCAAATGGAGTGT	AAGTCGATAATTGATGCCCATGCCAA
SLC16A6	TGTTTGCTTTCGCACCAG	AAGGCCCACGAAGAGGAG
LIPE	CCAGCCTGAGGGCTTACTG	CTCCATTGACTGTGACATCTCG
EVA	TGTGCTTCCACTTCTCCTGA	TCCACAGCTTCTGTAGGACAAA
COXBb	CCAGCCAAAACTCCCACTT	GAACCATGAAGCCAACGAC
G6P	GTGTCCAGGACCCACCAATA	ACTGTGGGCATCAATCTCCT
PCK1	TGTCTTCACTGAGGTGCCAG	CTGGATGAAGTTTGATGCCC
PDK4	TGACAGGGCTTTCTGGTCTT	AGTGAACACTCCTTCGGTGC
LDHa	TCGTGCACTAGCGGTCTCAA	AACAGCACCAACCCCAACA
LDHb	GGATTCACCCCGTGTCTACC	GAGCGACCTCATCGTCCTTC
RPS3	ATCAGAGAGTTGACCGCAGTTG	AATGAACCGAAGCACACCATAG
