# Supplementary figures and images for: Mitochondrial pyruvate carrier is required for optimal brown fat thermogenesis
Source: eLife journal article supplement (doi:10.7554/elife.52558), 2020-08-14

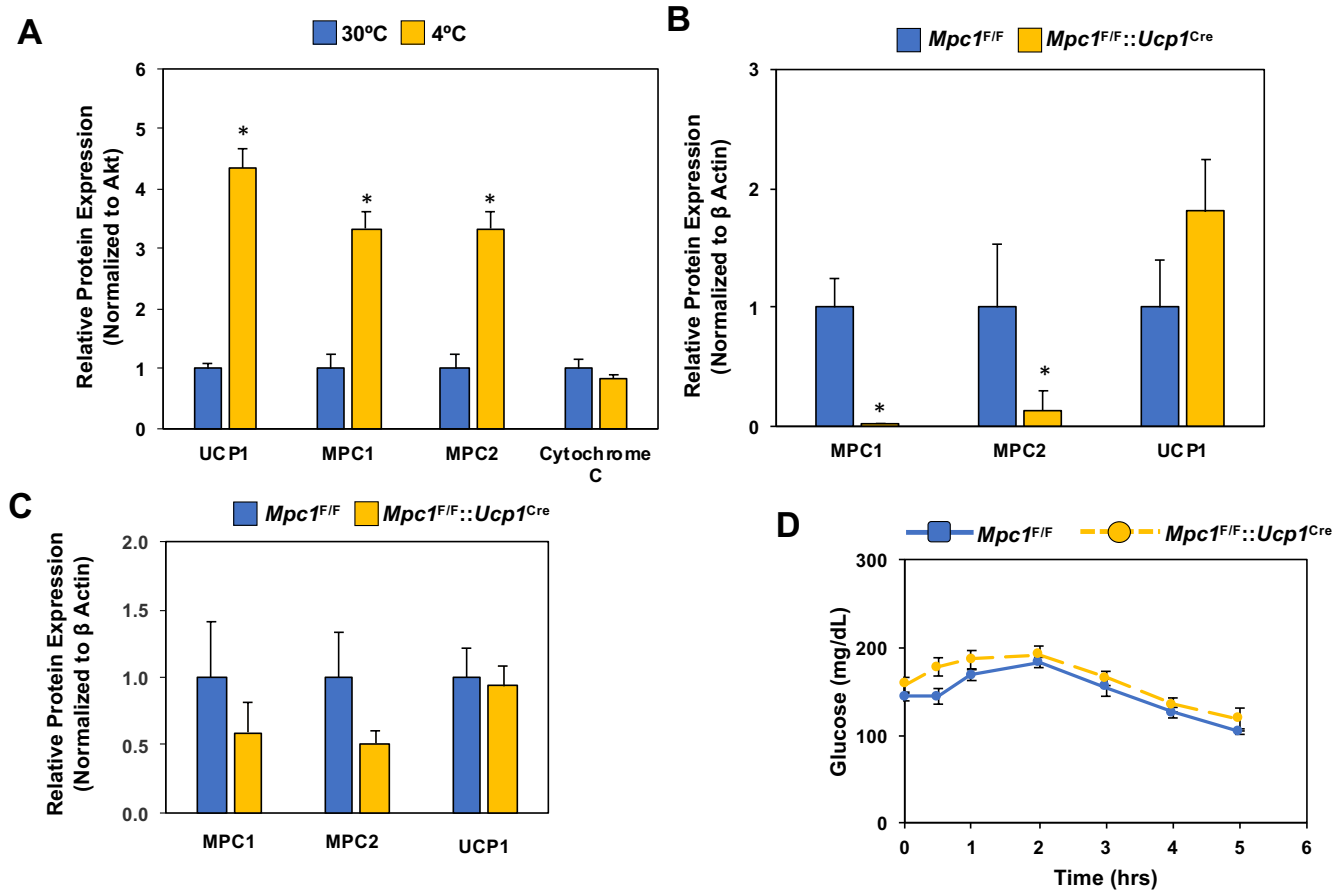

Figure 3-figure supplement 1

Supplement: supp [file elife-52558-supp-v1.zip]

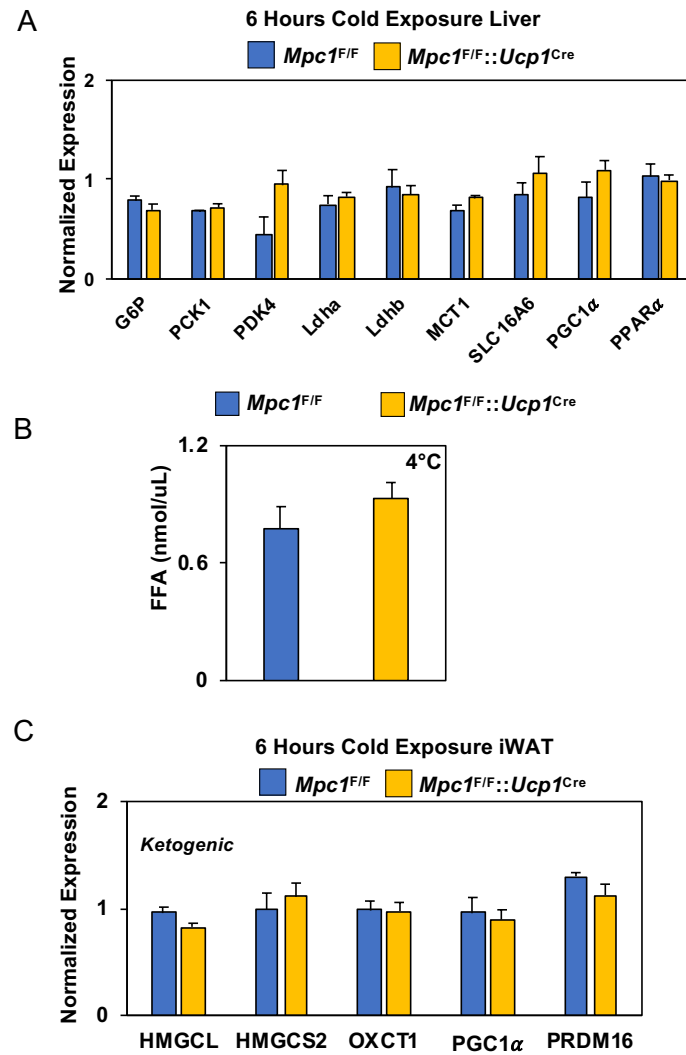

Figure 8-figure supplement 1

Supplement: supp [file elife-52558-supp-v1.zip]

**A**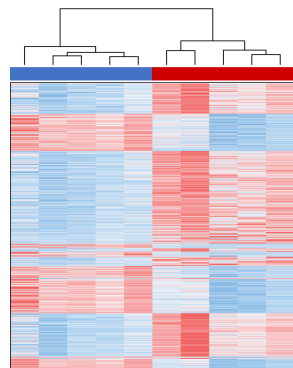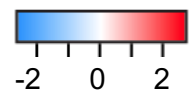

Z-score

Cold room

Room temp

**B**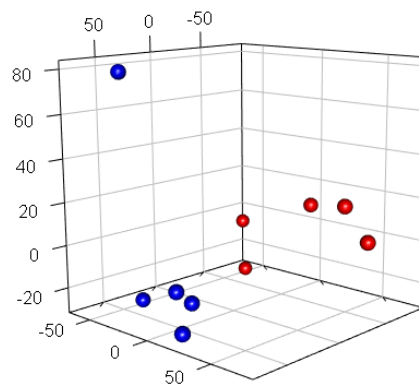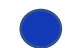

Cold room

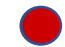

Room temp

Supplement: supp [file elife-52558-supp-v1.zip › elife_poa_e52558_Figure_1_figure_supplement_1.pdf]

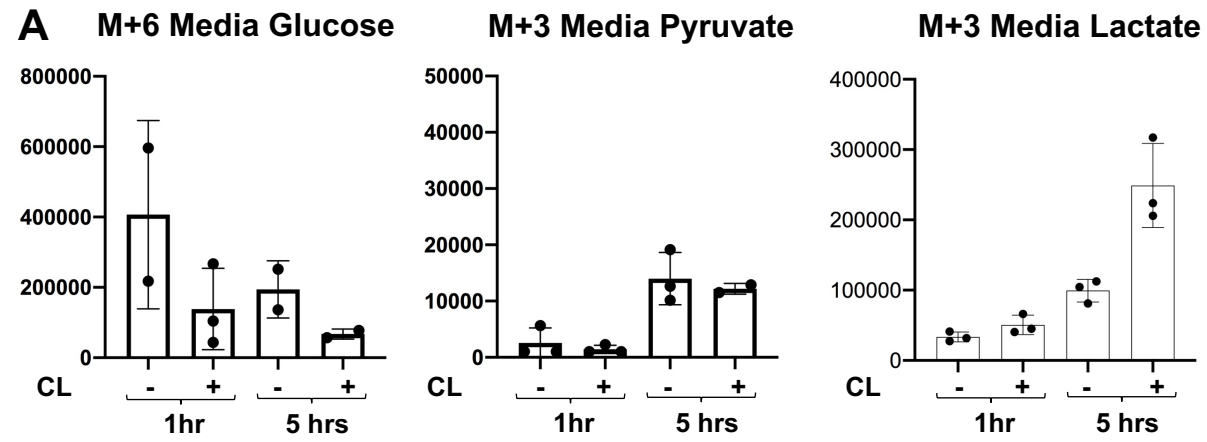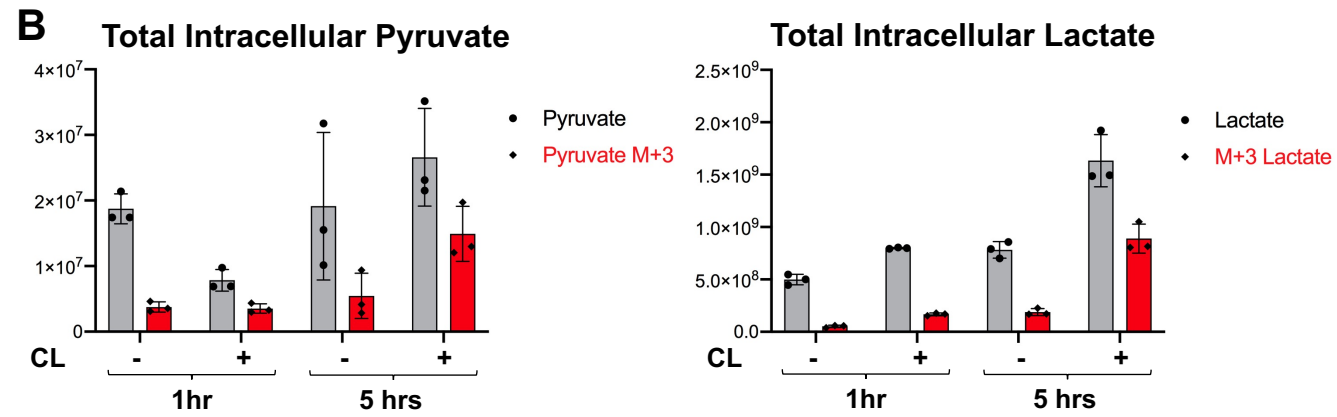

Figure 2-figure supplement 1

Supplement: supp [file elife-52558-supp-v1.zip › elife_poa_e52558_Figure_2_figure_supplement_1.pdf]

Figure 4-figure supplement 1

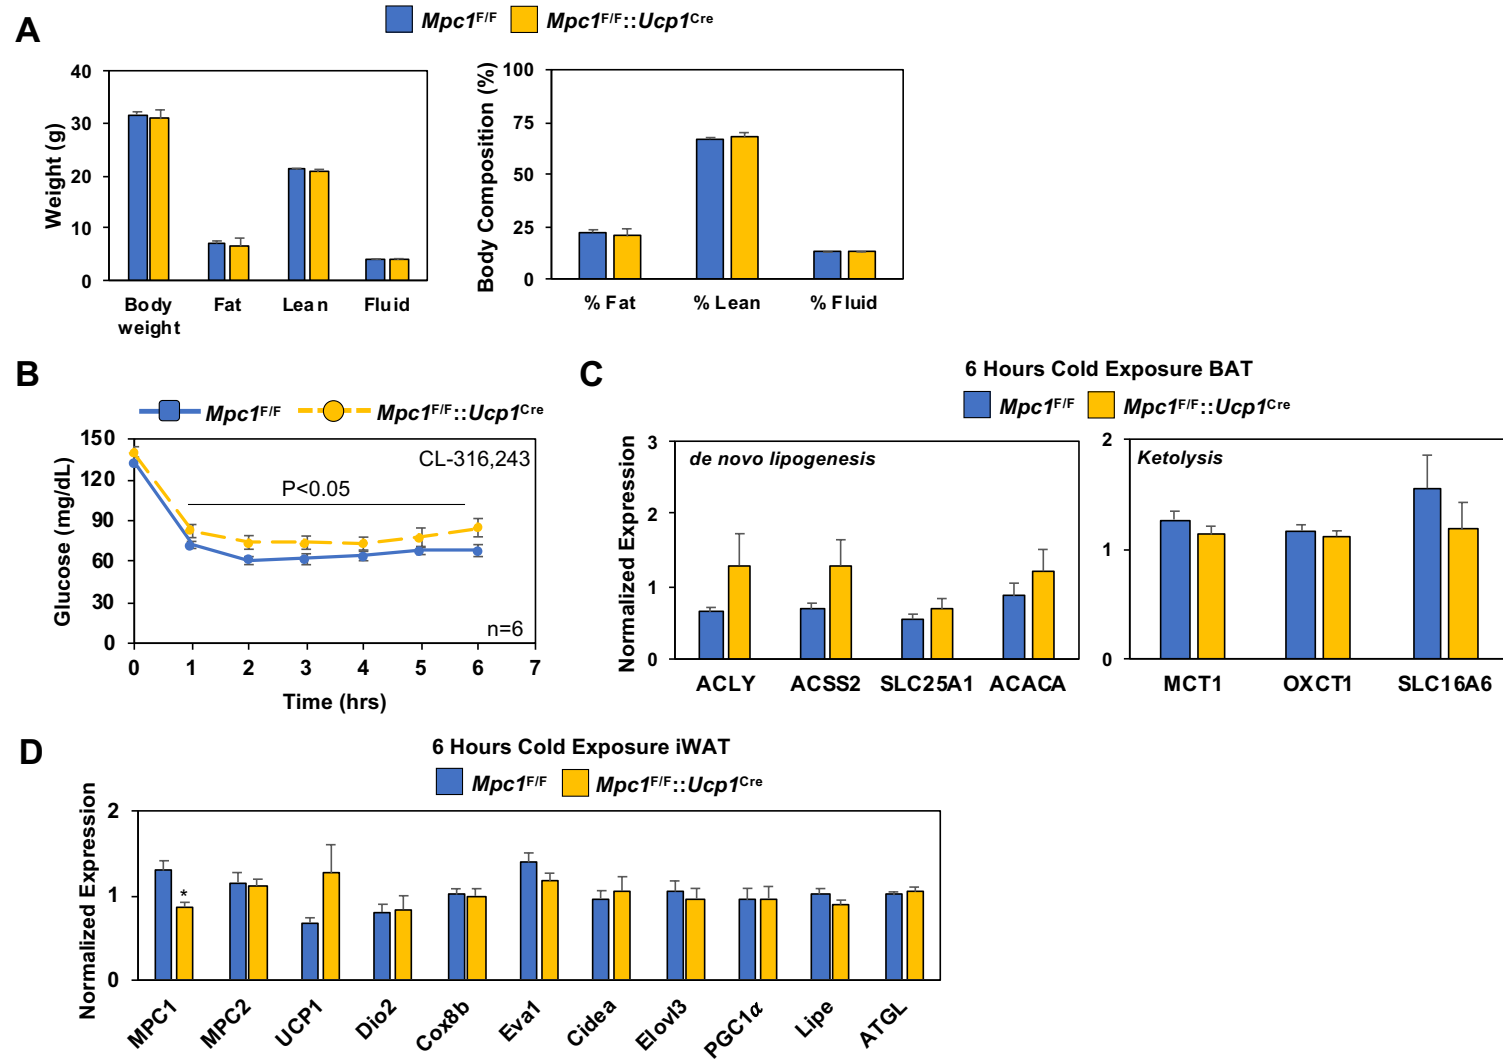

Supplement: supp [file elife-52558-supp-v1.zip › elife_poa_e52558_Figure_4_figure_supplement_1.pdf]

**A**

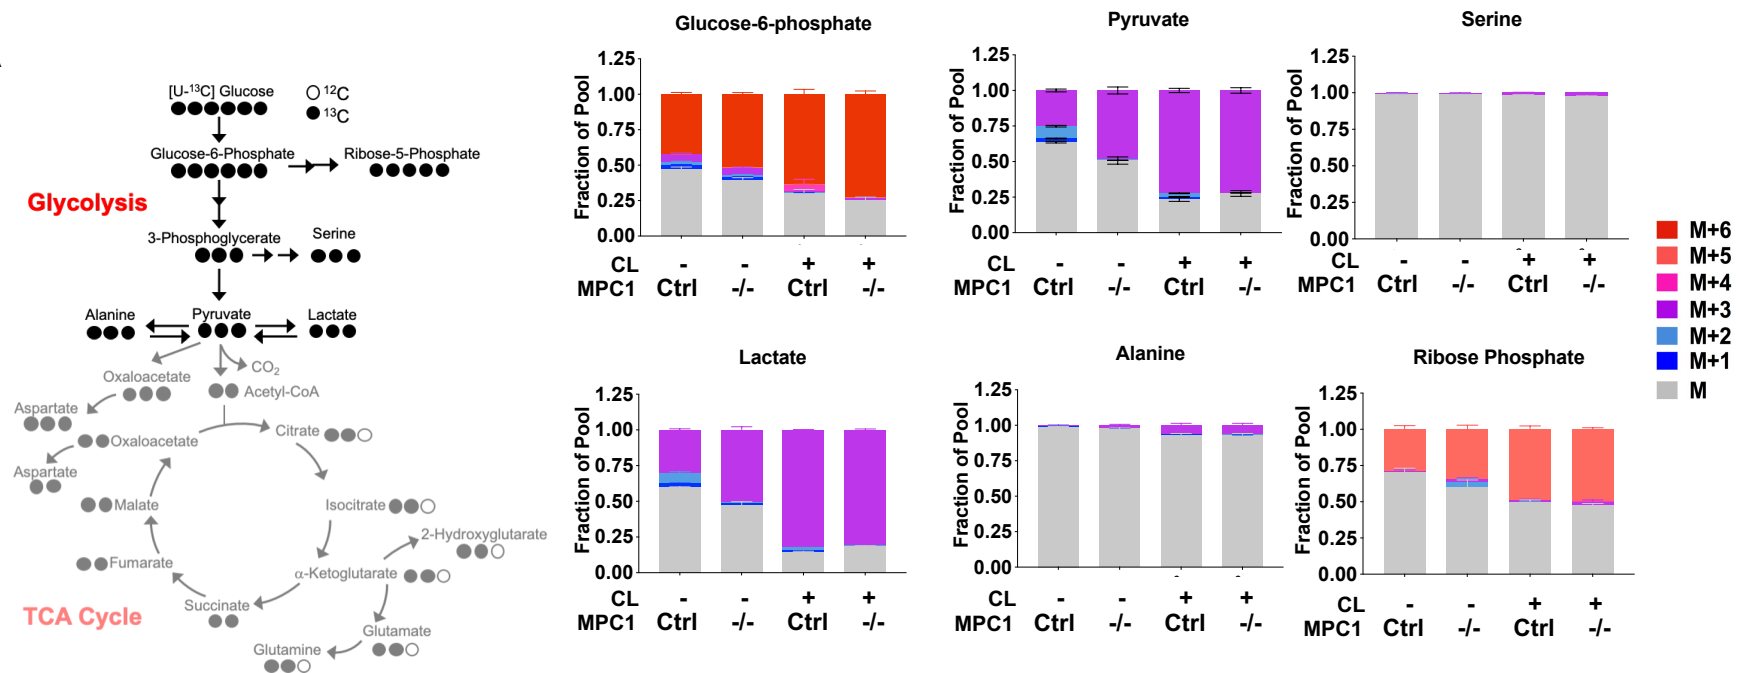

**B**

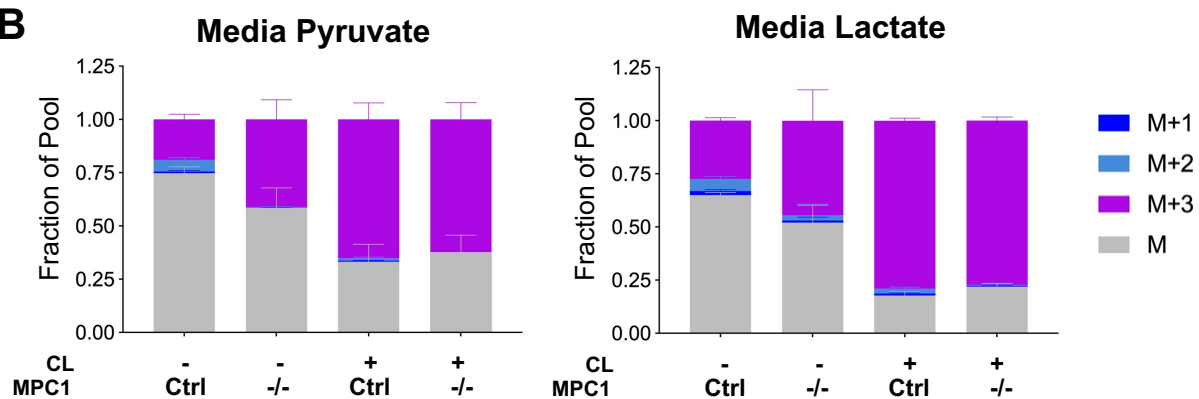

Figure 5-figure supplement 1

Supplement: supp [file elife-52558-supp-v1.zip › elife_poa_e52558_Figure_5_figure_supplement_1.pdf]

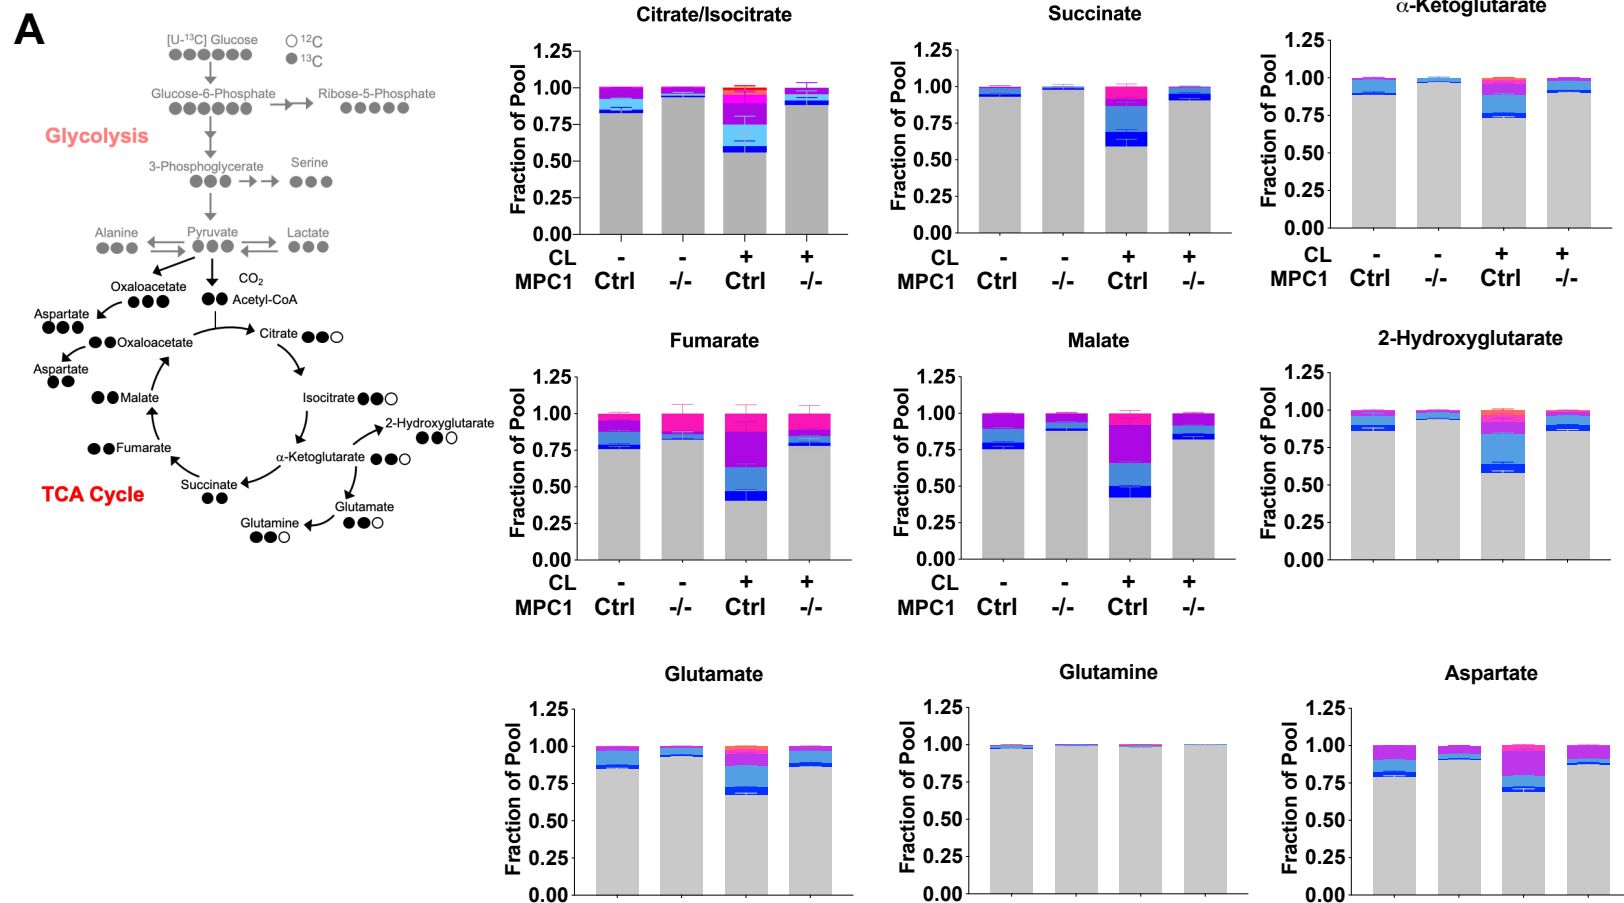

Figure 6-figure supplement 1

Supplement: supp [file elife-52558-supp-v1.zip › elife_poa_e52558_Figure_6_figure_supplement_1.pdf]

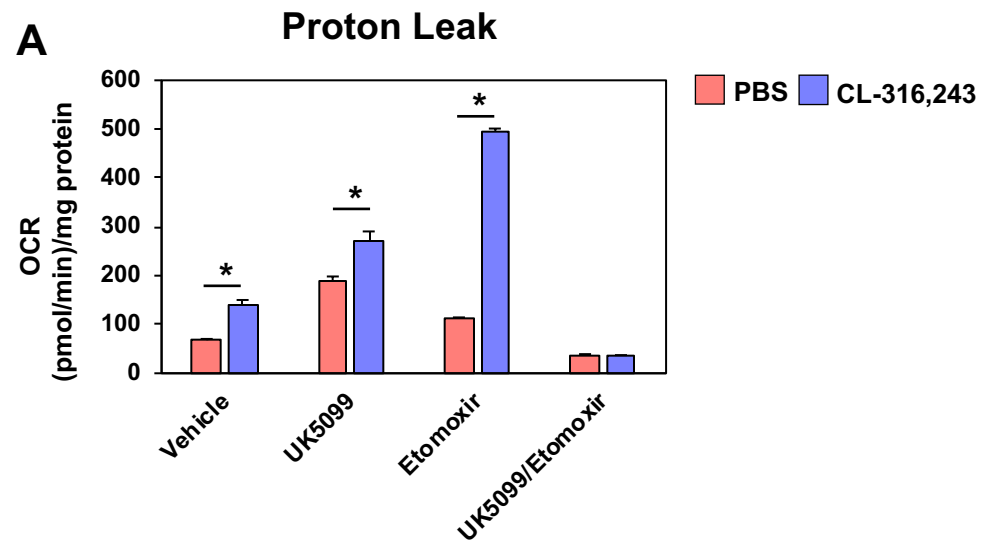

Figure 7-figure supplement 1

Supplement: supp [file elife-52558-supp-v1.zip › elife_poa_e52558_Figure_7_figure_supplement_1.pdf]
